# Supplementary material for: Impact of intensive control on malaria population genomics in Eastern Myanmar
Source: Research Square preprint supplement (doi:10.21203/rs.3.rs-6875020/v1), 2025-06-25
Supplement: Supplementary file 1 [file 18bf7723639955cdd6f7fad0.xlsx]

## Sheet: Table S1.a 5014 DryBloodSpots
SampleID	Year	Collection Date	MDA date	Collected before or after MDA	MP code	If included in analysis dataset	FWS	If infected with single genotype
MP0001	2016	2016-04-18	na	na	KP-0818	Included	0.974615	yes
MP0002	2016	2016-06-28	na	na	YT-0819	Not sequenced	NA	NA
MP0003	2016	2016-09-04	na	na	HP-13070	Not sequenced	NA	NA
MP0004	2016	2016-06-20	na	na	YT-0819	Included	0.961766	yes
MP0005	2016	2016-04-24	na	na	KL-0820	Included	0.962393	yes
MP0006	2016	2016-06-17	na	na	HK-11015	Not sequenced	NA	NA
MP0007	2016	2016-06-13	na	na	MH-0298A	Not sequenced	NA	NA
MP0008	2016	2016-06-15	2015-02-18	after	KT-0219	Included	0.949828	yes
MP0009	2016	2016-06-18	2016-03-11	after	NG-0807A	Not sequenced	NA	NA
MP0010	2016	2016-06-17	2015-08-07	after	TK-151A	Included	0.914492	yes
MP0011	2016	2016-06-15	2015-08-09	after	DL-0187A	Included	0.943822	yes
MP0012	2016	2016-06-05	na	na	TR-11006	Included	0.948188	yes
MP0013	2016	2016-12-06	na	na	KL-0268B	Included	0.954306	yes
MP0014	2016	2016-06-06	na	na	TR-11006	Included	0.959497	yes
MP0015	2016	2016-06-17	na	na	DB-0145A	Included	0.588663	no
MP0016	2016	2016-06-17	na	na	PS-0149	Low coverage	NA	NA
MP0017	2016	2016-08-06	2015-08-09	after	DL-0187A	Not sequenced	NA	NA
MP0018	2016	2016-06-16	na	na	MW-0176	Included	0.948429	yes
MP0019	2016	2016-06-15	na	na	KL-0268B	Not sequenced	NA	NA
MP0020	2016	2016-06-18	na	na	DB-0145A	Included	0.974069	yes
MP0021	2016	2016-06-16	na	na	HL-11001	Not sequenced	NA	NA
MP0022	2016	2016-06-14	na	na	HL-11001	Not sequenced	NA	NA
MP0023	2016	2016-06-19	na	na	HL-11001	Not sequenced	NA	NA
MP0024	2016	2016-06-13	na	na	HL-11001	Not sequenced	NA	NA
MP0025	2016	2016-06-18	na	na	DB-0145A	Included	0.952292	yes
MP0026	2016	2016-06-18	na	na	MN-268C	Included	0.93173	yes
MP0027	2016	2016-06-14	na	na	MN-268C	Included	0.980146	yes
MP0028	2016	2016-06-13	na	na	KL-0268B	Included	0.957554	yes
MP0029	2016	2016-05-20	na	na	BT-0198	Not sequenced	NA	NA
MP0030	NA	NA	na	na	KL-0268E	Included	0.974861	yes
MP0031	2016	2016-02-05	na	na	KL-0268B	Included	0.977014	yes
MP0032	2016	2016-05-17	na	na	DL-262A	Included	0.976927	yes
MP0033	2016	2016-04-22	na	na	WK-0343	Included	0.855507	no
MP0034	2016	2016-04-23	na	na	CK-298B	Included	0.97572	yes
MP0035	NA	NA	na	na	KL-0268E	Included	0.975885	yes
MP0036	2016	2016-05-18	na	na	BT-0198	Not sequenced	NA	NA
MP0037	2016	2016-02-05	na	na	KL-0268B	Included	0.970032	yes
MP0038	2016	2016-05-14	na	na	TR-11006	Not sequenced	NA	NA
MP0039	2016	2016-02-05	na	na	MM-11004	Included	0.974902	yes
MP0040	2016	2016-02-05	na	na	KL-0268B	Low coverage	NA	NA
MP0041	2016	2016-03-05	na	na	TR-11006	Included	0.945406	yes
MP0042	2016	2016-04-05	na	na	HB-0269A	Included	0.953494	yes
MP0043	2016	2016-05-05	na	na	KD-0249A	Low coverage	NA	NA
MP0044	2016	2016-05-05	2015-08-09	after	DL-0187A	Not sequenced	NA	NA
MP0045	2016	2016-04-05	2015-08-09	after	DL-0187A	Included	0.925451	yes
MP0046	2016	2016-04-24	na	na	DB-0145A	Included	0.962444	yes
MP0047	2016	2016-05-18	na	na	DB-0145B	Not sequenced	NA	NA
MP0048	2016	2016-03-26	na	na	NT-12059	Low coverage	NA	NA
MP0049	2016	2016-07-04	na	na	KL-0820	Not sequenced	NA	NA
MP0050	2016	2016-04-03	na	na	KL-0820	Low coverage	NA	NA
MP0051	2016	2016-02-29	na	na	KP-0818	Low coverage	NA	NA
MP0052	2016	2016-03-29	na	na	MN-0847	Not sequenced	NA	NA
MP0053	2016	2016-03-23	na	na	MN-0847	Not sequenced	NA	NA
MP0054	2016	2016-03-03	na	na	KL-0820	Included	0.9646	yes
MP0055	2016	2016-04-13	na	na	MN-0847	Not sequenced	NA	NA
MP0056	2016	2016-06-20	na	na	MW-0176	Included	0.975256	yes
MP0057	2016	2016-04-07	2020-05-02	before	LH-0266A	Included	0.948773	yes
MP0058	2016	2016-06-07	na	na	PL-0175	Included	0.925535	yes
MP0059	2016	2016-07-30	na	na	KL-0394	Included	0.96948	yes
MP0060	2016	2016-07-18	na	na	HB-11007	Not sequenced	NA	NA
MP0061	2016	2016-07-18	na	na	HB-11007	Not sequenced	NA	NA
MP0062	2016	2016-06-27	2016-03-14	after	MK-0288A	Not sequenced	NA	NA
MP0063	2016	2016-06-20	na	na	CK-11052A	Included	0.935835	yes
MP0064	2016	2016-06-25	na	na	NW-0325A	Not sequenced	NA	NA
MP0065	2016	2016-07-13	2016-09-02	before	MG-0261A	Not sequenced	NA	NA
MP0066	2016	2016-07-14	2016-09-02	before	MG-0261A	Included	0.946244	yes
MP0067	2016	2016-05-07	2016-09-02	before	MC-0396A	Not sequenced	NA	NA
MP0068	2016	2016-06-29	na	na	CK-11052A	Not sequenced	NA	NA
MP0069	2016	2016-07-26	na	na	HL-0365A	Not sequenced	NA	NA
MP0070	2016	2016-05-07	2017-06-30	before	MK-363C	Low coverage	NA	NA
MP0071	2016	2016-07-19	na	na	PH-0356A	Included	0.572769	no
MP0072	2016	2016-07-26	na	na	MN-0377	Not sequenced	NA	NA
MP0073	2016	2016-05-07	2017-06-30	before	MK-363C	Not sequenced	NA	NA
MP0074	2016	2016-07-24	na	na	PH-0356A	Not sequenced	NA	NA
MP0075	2016	2016-07-22	na	na	PH-0356A	Not sequenced	NA	NA
MP0076	2016	2016-07-25	na	na	MN-0377	Included	0.97325	yes
MP0077	2016	2016-08-07	na	na	MM-11004	Included	0.911748	yes
MP0078	2016	2016-07-22	na	na	PD-11057A	Low coverage	NA	NA
MP0079	2016	2016-07-13	na	na	ML-0458A	Not sequenced	NA	NA
MP0080	2016	2016-11-07	na	na	HL-0365A	Included	0.853924	no
MP0081	2016	2016-07-20	na	na	NB-11054A	Included	0.915739	yes
MP0082	2016	2016-11-07	na	na	MM-11004	Not sequenced	NA	NA
MP0083	2016	2016-07-14	2015-08-09	after	DL-0187A	Not sequenced	NA	NA
MP0084	2016	2016-07-21	na	na	MM-11004	Included	0.968556	yes
MP0085	2016	2016-02-07	na	na	HB-11007	Included	0.940495	yes
MP0086	2016	2016-07-07	2020-05-02	before	LH-0266B	Included	0.929801	yes
MP0087	2016	2016-06-23	2020-05-02	before	LH-0266B	Included	0.952681	yes
MP0088	2016	2016-06-23	2020-05-02	before	LH-0266B	Not sequenced	NA	NA
MP0089	2016	2016-06-27	2020-05-02	before	LH-0266B	Included	0.950668	yes
MP0090	2016	2016-06-27	2020-05-02	before	LH-0266B	Not sequenced	NA	NA
MP0091	2016	2016-06-28	2020-05-02	before	LH-0266B	Not sequenced	NA	NA
MP0092	2016	2016-06-28	2020-05-02	before	LH-0266B	Not sequenced	NA	NA
MP0093	2016	2016-06-07	2020-05-02	before	LH-0266B	Not sequenced	NA	NA
MP0094	2016	2016-11-07	2020-05-02	before	LH-0266B	Included	0.942497	yes
MP0095	2016	2016-07-20	2020-05-02	before	LH-0266B	Included	0.936283	yes
MP0096	2016	2016-07-25	2020-05-02	before	LH-0266B	Not sequenced	NA	NA
MP0097	2016	2016-12-07	na	na	MM-11004	Not sequenced	NA	NA
MP0098	2016	2016-07-28	na	na	PK-0406A	Not sequenced	NA	NA
MP0099	2016	2016-07-27	na	na	KN-0293A	Not sequenced	NA	NA
MP0100	2016	2016-06-29	na	na	HB-11007	Included	0.948358	yes
MP0101	2016	2016-06-29	na	na	HB-11007	Included	0.974218	yes
MP0102	2016	2016-09-07	na	na	HL-0221A	Not sequenced	NA	NA
MP0103	2016	2016-07-15	na	na	NB-11054A	Included	0.938887	yes
MP0104	2016	2016-10-07	na	na	LK-0491A	Not sequenced	NA	NA
MP0105	2016	2016-07-18	na	na	MM-11004	Not sequenced	NA	NA
MP0106	2016	2016-07-13	2015-08-09	after	DL-0187A	Not sequenced	NA	NA
MP0107	2016	2016-07-25	na	na	MP-0415A	Not sequenced	NA	NA
MP0108	2016	2016-06-24	na	na	MN-268C	Not sequenced	NA	NA
MP0109	2016	2016-07-13	na	na	LK-0491A	Not sequenced	NA	NA
MP0110	2016	2016-06-21	na	na	HL-11001	Included	0.93098	yes
MP0111	2016	2016-04-07	na	na	MM-11004	Not sequenced	NA	NA
MP0112	2016	2016-06-07	na	na	PW-0244A	Not sequenced	NA	NA
MP0113	2016	2016-05-07	na	na	HK-0277A	Included	0.962471	yes
MP0114	2016	2016-06-28	na	na	MM-11004	Included	0.858622	no
MP0115	2016	2016-10-07	na	na	WT-11053A	Included	0.968008	yes
MP0116	2016	2016-06-23	na	na	KW-0296A	Not sequenced	NA	NA
MP0117	2016	2016-06-20	na	na	KW-0296A	Not sequenced	NA	NA
MP0118	2016	2016-07-26	na	na	LK-0491A	Not sequenced	NA	NA
MP0119	2016	2016-07-16	2016-09-02	before	MG-0261A	Included	0.943359	yes
MP0120	2016	2016-07-20	2016-03-14	after	MK-0288A	Not sequenced	NA	NA
MP0121	2016	2016-06-22	na	na	MW-0176	Included	0.929469	yes
MP0122	2016	2016-07-15	2016-09-02	before	MG-0261A	Not sequenced	NA	NA
MP0123	2016	2016-06-16	na	na	TG-250A	Included	0.978289	yes
MP0124	2016	2016-06-22	na	na	KW-0296A	Included	0.960904	yes
MP0125	2016	2016-07-25	2016-09-02	before	MC-0396A	Not sequenced	NA	NA
MP0126	2016	2016-07-26	na	na	LK-0491A	Not sequenced	NA	NA
MP0127	2016	2016-06-21	na	na	MT-207A	Not sequenced	NA	NA
MP0128	2016	2016-06-15	na	na	MT-207A	Included	0.937324	yes
MP0129	2016	2016-06-21	na	na	MT-207A	Included	0.927122	yes
MP0130	2016	2016-07-28	na	na	KP-0344A	Included	0.92528	yes
MP0131	2016	2016-11-07	na	na	BT-0353B	Not sequenced	NA	NA
MP0132	2016	2016-06-23	na	na	PS-0149	Not sequenced	NA	NA
MP0133	2016	2016-07-30	na	na	KL-11013	Not sequenced	NA	NA
MP0134	2016	2016-07-26	2016-08-31	before	PL-0366	Not sequenced	NA	NA
MP0135	2016	2016-07-28	na	na	HT-0378A	Not sequenced	NA	NA
MP0136	2016	2016-06-20	2020-05-02	before	LH-0266B	Included	0.947938	yes
MP0137	2016	2016-06-20	2020-05-02	before	LH-0266B	Not sequenced	NA	NA
MP0138	2016	2016-06-21	2015-02-18	after	KT-0219	Not sequenced	NA	NA
MP0139	2016	2016-07-25	na	na	PS-11064A	Not sequenced	NA	NA
MP0140	2016	2016-06-20	na	na	DB-0145B	Included	0.969549	yes
MP0141	2016	2016-06-28	2016-08-31	before	PL-0366	Included	0.977777	yes
MP0142	2016	2016-06-20	na	na	PS-11064A	Not sequenced	NA	NA
MP0143	2016	2016-06-22	2020-05-02	before	LH-0266A	Not sequenced	NA	NA
MP0144	2016	2016-06-23	na	na	KK-0254A	Included	0.948373	yes
MP0145	2016	2016-06-20	na	na	AR-0267A	Not sequenced	NA	NA
MP0146	2016	2016-06-25	na	na	KW-0296A	Not sequenced	NA	NA
MP0147	2016	2016-02-07	na	na	KB-0148	Included	0.931586	yes
MP0148	2016	2016-07-22	na	na	MM-11004	Not sequenced	NA	NA
MP0149	2016	2016-07-13	na	na	MM-11004	Not sequenced	NA	NA
MP0150	2016	2016-02-07	na	na	HB-11007	Included	0.947277	yes
MP0151	2016	2016-07-25	2017-07-11	before	WM-0367	Not sequenced	NA	NA
MP0152	2016	2016-11-07	na	na	HP-11009	Not sequenced	NA	NA
MP0153	2016	2016-07-14	na	na	HL-0365A	Not sequenced	NA	NA
MP0154	2016	2016-07-13	2016-03-14	after	PL-0327A	Included	0.931567	yes
MP0155	2016	2016-07-29	na	na	KO-0204A	Not sequenced	NA	NA
MP0156	2016	2016-07-28	na	na	NB-11054A	Not sequenced	NA	NA
MP0157	2016	2016-07-14	na	na	ML-0458A	Included	0.967388	yes
MP0158	2016	2016-08-07	na	na	HB-11007	Not sequenced	NA	NA
MP0159	2016	2016-07-16	2016-09-12	before	WT-0297	Included	0.967846	yes
MP0160	2016	2016-07-17	2016-09-12	before	WT-0297	Not sequenced	NA	NA
MP0161	2016	2016-06-20	na	na	NL-0220	Low coverage	NA	NA
MP0162	2016	2016-07-16	na	na	KL-0268A	Not sequenced	NA	NA
MP0163	2016	2016-06-29	na	na	NB-11054A	Not sequenced	NA	NA
MP0164	2016	2016-01-07	2015-08-09	after	DL-0187A	Not sequenced	NA	NA
MP0165	2016	2016-07-13	na	na	PK-0159	Included	0.96195	yes
MP0166	2016	2016-06-20	na	na	HL-11001	Included	0.92875	yes
MP0167	2016	2016-06-21	na	na	MH-0298A	Included	0.945594	yes
MP0168	2016	2016-11-07	na	na	KH-0213A	Not sequenced	NA	NA
MP0169	2016	2016-06-20	na	na	DL-262A	Included	0.945198	yes
MP0170	2016	2016-06-21	na	na	KN-0217A	Included	0.934887	yes
MP0171	2016	2016-06-27	na	na	OT-0268D	Not sequenced	NA	NA
MP0172	2016	2016-06-27	na	na	HK-0170A	Not sequenced	NA	NA
MP0173	2016	2016-06-30	na	na	AH-0299A	Not sequenced	NA	NA
MP0174	2016	2016-04-07	2016-09-11	before	MK-0386B	Not sequenced	NA	NA
MP0175	2016	2016-04-07	na	na	LK-0491B	Not sequenced	NA	NA
MP0176	2016	2016-02-07	na	na	NB-11051A	Not sequenced	NA	NA
MP0177	2016	2016-06-21	na	na	PN-11043	Not sequenced	NA	NA
MP0178	2016	2016-07-07	na	na	TK-0459	Not sequenced	NA	NA
MP0179	2016	2016-06-27	na	na	NP-0400A	Not sequenced	NA	NA
MP0180	2016	2016-04-07	na	na	LK-0491B	Not sequenced	NA	NA
MP0181	2016	2016-11-07	2015-09-12	after	HT-0323	Not sequenced	NA	NA
MP0182	2016	2016-07-14	2016-09-12	before	WT-0297	Not sequenced	NA	NA
MP0183	2016	2016-06-23	2015-09-12	after	LN-0163A	Not sequenced	NA	NA
MP0184	2016	2016-06-25	na	na	KL-0268A	Not sequenced	NA	NA
MP0185	2016	2016-06-25	na	na	KL-0268A	Included	0.937571	yes
MP0186	2016	2016-07-18	na	na	MK-11003	Not sequenced	NA	NA
MP0187	2016	2016-06-23	na	na	HL-0221A	Not sequenced	NA	NA
MP0188	2016	2016-06-22	na	na	HL-0221A	Included	0.942092	yes
MP0189	2016	2016-07-18	na	na	HB-0269A	Included	0.942425	yes
MP0190	2016	2016-06-24	na	na	DP-0227A	Included	0.94133	yes
MP0191	2016	2016-06-21	na	na	HL-0221A	Included	0.929902	yes
MP0192	2016	2016-07-23	na	na	NN-0291A	Not sequenced	NA	NA
MP0193	2016	2016-06-28	na	na	MT-0342A	Included	0.943302	yes
MP0194	2016	2016-06-21	na	na	TR-11006	Included	0.976344	yes
MP0195	2016	2016-06-20	na	na	MM-11004	Not sequenced	NA	NA
MP0196	2016	2016-07-19	na	na	MT-0432	Included	0.94135	yes
MP0197	2016	2016-12-07	na	na	KH-0346A	Included	0.951717	yes
MP0198	2016	2016-05-07	na	na	CK-11052A	Not sequenced	NA	NA
MP0199	2016	2016-06-20	na	na	HL-11001	Included	0.910903	yes
MP0200	2016	2016-06-21	na	na	MN-268C	Included	0.966882	yes
MP0201	2016	2016-06-22	na	na	WT-0352A	Not sequenced	NA	NA
MP0202	2016	2016-10-07	na	na	LK-0491A	Not sequenced	NA	NA
MP0203	2016	2016-04-07	na	na	HK-0277A	Not sequenced	NA	NA
MP0204	2016	2016-08-07	na	na	HB-11007	Not sequenced	NA	NA
MP0205	2016	2016-07-19	2015-08-09	after	DL-0187A	Included	0.948809	yes
MP0206	2016	2016-07-18	na	na	HL-0365A	Not sequenced	NA	NA
MP0207	2016	2016-08-07	na	na	HB-11007	Not sequenced	NA	NA
MP0208	2016	2016-06-25	na	na	NG-0359A	Included	0.944258	yes
MP0209	2016	2016-06-20	na	na	HB-0340A	Included	0.911164	yes
MP0210	2016	2016-06-28	2016-09-02	before	MG-0261A	Included	0.97744	yes
MP0211	2016	2016-06-20	na	na	BT-0353A	Included	0.925913	yes
MP0212	2016	2016-07-20	na	na	HL-0365A	Not sequenced	NA	NA
MP0213	2016	2016-07-20	2015-08-09	after	DL-0187A	Not sequenced	NA	NA
MP0214	2016	2016-04-07	na	na	PP-11050A	Included	0.94925	yes
MP0215	2016	2016-11-07	na	na	KP-0344A	Not sequenced	NA	NA
MP0216	2016	2016-12-07	na	na	KP-0344A	Included	0.484173	no
MP0217	2016	2016-12-07	na	na	KP-0344A	Not sequenced	NA	NA
MP0218	2016	2016-06-22	na	na	DB-0145A	Not sequenced	NA	NA
MP0219	2016	2016-07-27	na	na	PH-0356A	Not sequenced	NA	NA
MP0220	2016	2016-07-18	na	na	KK-0254A	Not sequenced	NA	NA
MP0221	2016	2016-06-30	2016-09-03	before	WT-0314A	Included	0.938073	yes
MP0222	2016	2016-08-07	2017-06-30	before	MK-363C	Not sequenced	NA	NA
MP0223	2016	2016-07-28	na	na	KB-0148	Not sequenced	NA	NA
MP0224	2016	2016-07-25	na	na	KP-0344A	Not sequenced	NA	NA
MP0225	2016	2016-07-20	na	na	HS-0364	Not sequenced	NA	NA
MP0226	2016	2016-07-21	na	na	HS-0364	Not sequenced	NA	NA
MP0227	2016	2016-07-28	2020-05-02	before	LH-0266B	Not sequenced	NA	NA
MP0228	2016	2016-07-14	na	na	KP-0344A	Not sequenced	NA	NA
MP0229	2016	2016-11-07	na	na	HS-0364	Included	0.654834	no
MP0230	2016	2016-06-25	na	na	DB-0145A	Not sequenced	NA	NA
MP0231	2016	2016-01-07	na	na	DB-0145B	Included	0.935405	yes
MP0232	2016	2016-07-14	na	na	HS-0364	Not sequenced	NA	NA
MP0233	2016	2016-07-15	na	na	HS-0364	Included	0.933247	yes
MP0235	2016	2016-01-07	na	na	KN-0293A	Not sequenced	NA	NA
MP0236	2016	2016-06-10	na	na	KL-0767	Included	0.925716	yes
MP0237	2016	2016-06-10	na	na	KL-0767	Included	0.937254	yes
MP0238	2016	2016-06-16	na	na	MK-0447	Not sequenced	NA	NA
MP0239	2016	2016-06-16	na	na	MK-0447	Not sequenced	NA	NA
MP0240	2016	2016-06-13	2020-05-02	before	LH-0266A	Included	0.942069	yes
MP0241	2016	2016-06-13	2020-05-02	before	LH-0266A	Not sequenced	NA	NA
MP0242	2016	2016-06-14	2020-05-02	before	LH-0266A	Not sequenced	NA	NA
MP0243	2016	2016-06-14	2020-05-02	before	LH-0266A	Included	0.939976	yes
MP0244	2016	2016-06-14	2020-05-02	before	LH-0266A	Included	0.938405	yes
MP0245	2016	2016-06-14	2020-05-02	before	LH-0266A	Included	0.943651	yes
MP0246	2016	2016-06-14	2020-05-02	before	LH-0266A	Not sequenced	NA	NA
MP0247	2016	2016-06-15	2020-05-02	before	LH-0266A	Included	0.922241	yes
MP0248	2016	2016-06-15	2020-05-02	before	LH-0266A	Included	0.936782	yes
MP0249	2016	2016-06-15	2020-05-02	before	LH-0266A	Included	0.949779	yes
MP0250	2016	2016-06-17	2020-05-02	before	LH-0266A	Not sequenced	NA	NA
MP0251	2016	2016-06-17	2020-05-02	before	LH-0266A	Included	0.957635	yes
MP0252	2016	2016-06-17	2020-05-02	before	LH-0266A	Included	0.954185	yes
MP0253	2016	2016-06-18	2020-05-02	before	LH-0266A	Included	0.950405	yes
MP0254	2016	2016-06-19	2020-05-02	before	LH-0266A	Included	0.977358	yes
MP0255	2016	2016-06-19	2020-05-02	before	LH-0266A	Not sequenced	NA	NA
MP0258	2016	2016-04-11	na	na	WK-0343	Not sequenced	NA	NA
MP0259	2016	2016-01-29	na	na	TD-0279	Not sequenced	NA	NA
MP0260	2016	2016-01-18	na	na	MN-268C	Not sequenced	NA	NA
MP0261	2016	2016-03-11	na	na	MK-11003	Included	0.961215	yes
MP0262	2016	2016-01-26	na	na	KL-0268B	Not sequenced	NA	NA
MP0263	2016	2016-04-05	na	na	TR-11006	Included	0.973473	yes
MP0264	2016	2016-02-15	2017-07-12	before	TG-0357	Included	0.957358	yes
MP0265	2016	2016-01-25	na	na	KP-0818	Not sequenced	NA	NA
MP0266	2016	2016-02-16	2017-06-30	before	MK-363C	Included	0.972688	yes
MP0267	2016	2016-04-05	na	na	TR-11006	Included	0.969982	yes
MP0268	2016	2016-02-11	na	na	KT-0118A	Not sequenced	NA	NA
MP0269	2016	2016-02-04	2017-07-04	before	TM-0363F	Included	0.950507	yes
MP0270	2016	2016-01-26	na	na	OT-0268D	Included	0.970118	yes
MP0271	2016	2016-02-17	2017-06-30	before	MK-363C	Included	0.586287	no
MP0272	2016	2016-02-03	2017-06-30	before	MK-363C	Included	0.815466	no
MP0274	2016	2016-02-14	na	na	ML-0363B	Not sequenced	NA	NA
MP0275	2016	2016-02-01	na	na	ML-0363B	Not sequenced	NA	NA
MP0276	2016	2016-07-04	na	na	LK-0491B	Not sequenced	NA	NA
MP0277	2016	2016-07-25	2016-09-11	before	MW-0386A	Included	0.960361	yes
MP0278	2016	2016-06-18	na	na	HK-0208A	Included	0.940175	yes
MP0279	2016	2016-06-09	na	na	KL-0767	Included	0.952943	yes
MP0280	2016	2016-06-10	na	na	KL-0767	Low coverage	NA	NA
MP0283	2016	2016-06-07	na	na	KP-0818	Not sequenced	NA	NA
MP0284	2016	2016-06-16	na	na	TL-0797	Not sequenced	NA	NA
MP0285	2016	2016-07-04	na	na	KP-0818	Not sequenced	NA	NA
MP0286	2016	2016-07-13	na	na	KL-0820	Not sequenced	NA	NA
MP0287	2016	2016-07-13	na	na	KL-0820	Not sequenced	NA	NA
MP0288	2016	2016-07-13	na	na	KL-0820	Not sequenced	NA	NA
MP0289	2016	2016-07-14	na	na	KM-13055	Low coverage	NA	NA
MP0290	2016	2016-07-20	na	na	YT-0819	Not sequenced	NA	NA
MP0291	2016	2016-07-17	na	na	HP-0683	Included	0.909181	yes
MP0292	2016	2016-07-12	na	na	MK-0648	Not sequenced	NA	NA
MP0293	2016	2016-07-04	na	na	TN-0843	Not sequenced	NA	NA
MP0294	2016	2016-08-24	2016-09-12	before	KN-0388A	Not sequenced	NA	NA
MP0295	2016	2016-08-12	na	na	HS-0364	Low coverage	NA	NA
MP0296	2016	2016-08-12	2016-03-14	after	PL-0327A	Included	0.949044	yes
MP0297	2016	2016-08-09	na	na	NW-0325A	Not sequenced	NA	NA
MP0298	2016	2016-08-08	na	na	KK-0254A	Not sequenced	NA	NA
MP0299	2016	2016-08-09	na	na	MM-11004	Not sequenced	NA	NA
MP0300	2016	2016-08-22	na	na	WW-0381	Not sequenced	NA	NA
MP0301	2016	2016-08-10	na	na	DH-11075	Not sequenced	NA	NA
MP0302	2016	2016-08-10	na	na	DH-11075	Not sequenced	NA	NA
MP0303	2016	2016-08-19	na	na	MN-0377	Low coverage	NA	NA
MP0304	2016	2016-05-23	na	na	LW-0169	Low coverage	NA	NA
MP0306	2016	2016-05-23	na	na	LW-0169	Included	0.966445	yes
MP0307	2016	2016-05-27	na	na	LW-0169	Included	0.957661	yes
MP0308	2016	2016-08-27	na	na	KL-11013	Not sequenced	NA	NA
MP0309	2016	2016-08-18	na	na	LN-163B	Included	0.953116	yes
MP0310	2016	2016-08-24	2016-09-12	before	KN-0388A	Not sequenced	NA	NA
MP0311	2016	2016-08-16	na	na	KW-0296A	Not sequenced	NA	NA
MP0312	2016	2016-08-03	na	na	LW-0169	Not sequenced	NA	NA
MP0313	2016	2016-08-02	na	na	HB-11007	Included	0.949238	yes
MP0314	2016	2016-08-23	na	na	KL-11013	Not sequenced	NA	NA
MP0318	2016	2016-08-10	na	na	MN-0377	Not sequenced	NA	NA
MP0319	2016	2016-08-25	na	na	CK-11052A	Not sequenced	NA	NA
MP0320	2016	2016-08-10	na	na	PB-0275	Included	0.954737	yes
MP0321	2016	2016-08-08	na	na	NP-0400A	Not sequenced	NA	NA
MP0322	2016	2016-08-09	na	na	HL-0221A	Included	0.952037	yes
MP0323	2016	2016-08-22	na	na	PH-0356A	Not sequenced	NA	NA
MP0326	2016	2016-08-09	na	na	HS-0364	Not sequenced	NA	NA
MP0327	2016	2016-08-16	na	na	MN-0377	Not sequenced	NA	NA
MP0328	2016	2016-08-16	na	na	NK-0403	Not sequenced	NA	NA
MP0329	2016	2016-08-24	na	na	PH-0356A	Not sequenced	NA	NA
MP0330	2016	2016-08-22	na	na	PH-0356A	Not sequenced	NA	NA
MP0331	2016	2016-07-26	na	na	KT-0433	Not sequenced	NA	NA
MP0333	2016	2016-08-20	na	na	PN-0196	Not sequenced	NA	NA
MP0334	2016	2016-08-23	na	na	KT-0433	Included	0.967725	yes
MP0335	2016	2016-08-15	na	na	NK-0403	Not sequenced	NA	NA
MP0337	2016	2016-08-25	na	na	PH-0356A	Included	0.925116	yes
MP0338	2016	2016-08-20	na	na	HS-0364	Not sequenced	NA	NA
MP0339	2016	2016-08-15	na	na	NK_11800A	Included	0.627246	no
MP0340	2016	2016-08-16	na	na	TM-298C	Included	0.966964	yes
MP0341	2016	2016-08-03	na	na	KL-0394	Low coverage	NA	NA
MP0342	2016	2016-08-22	na	na	PH-0356A	Not sequenced	NA	NA
MP0343	2016	2016-08-27	na	na	PH-0356A	Not sequenced	NA	NA
MP0345	2016	2016-08-15	na	na	MN-0377	Included	0.941176	yes
MP0347	2016	2016-08-28	na	na	NK-0450A	Not sequenced	NA	NA
MP0348	2016	2016-08-21	2016-03-13	after	MT-193A	Not sequenced	NA	NA
MP0349	2016	2016-08-19	na	na	NK_11800A	Included	0.969144	yes
MP0350	2016	2016-08-16	na	na	KP-0344B	Included	0.933518	yes
MP0351	2016	2016-08-15	na	na	NK-0403	Not sequenced	NA	NA
MP0352	2016	2016-08-23	na	na	PK-0406A	Included	0.938123	yes
MP0353	2016	2016-11-26	na	na	LT-0133B	Included	0.957945	yes
MP0354	2016	2016-12-08	na	na	TM-0308	Low coverage	NA	NA
MP0355	2016	2016-11-25	na	na	PT-0395	Not sequenced	NA	NA
MP0356	2016	2016-09-05	na	na	ML-11071	Not sequenced	NA	NA
MP0357	NA	NA	na	na	CK-11052A	Low coverage	NA	NA
MP0358	2016	2016-09-01	na	na	HB-11007	Not sequenced	NA	NA
MP0359	2016	2016-09-06	na	na	KD-11058	Low coverage	NA	NA
MP0360	2016	2016-07-19	na	na	HL-11001	Not sequenced	NA	NA
MP0361	2016	2016-08-29	na	na	KL-11013	Included	0.966914	yes
MP0362	2016	2016-09-02	na	na	KP-0413	Not sequenced	NA	NA
MP0363	2016	2016-09-05	na	na	CK-11052A	Included	0.975476	yes
MP0364	2016	2016-08-31	2017-07-04	before	TP-0339	Not sequenced	NA	NA
MP0365	2016	2016-08-20	na	na	MP-0412A	Not sequenced	NA	NA
MP0366	2016	2016-08-29	na	na	LK-0331	Not sequenced	NA	NA
MP0367	2016	2016-08-30	na	na	TK-0306	Not sequenced	NA	NA
MP0368	2016	2016-09-08	na	na	TK-0306	Not sequenced	NA	NA
MP0369	2016	2016-08-31	na	na	TK-0306	Not sequenced	NA	NA
MP0370	2016	2016-09-02	2015-02-14	after	BD-0273	Not sequenced	NA	NA
MP0371	2016	2016-09-06	na	na	TM-298C	Included	0.973238	yes
MP0372	2016	2016-08-30	na	na	KK-0246	Not sequenced	NA	NA
MP0373	2016	2016-09-08	na	na	MH-0298A	Included	0.961791	yes
MP0374	2016	2016-08-30	2015-08-09	after	PD-0372	Not sequenced	NA	NA
MP0375	2016	2016-09-05	2015-08-09	after	PD-0372	Included	0.958666	yes
MP0376	2016	2016-09-10	na	na	HS-0364	Included	0.946835	yes
MP0377	2016	2016-09-10	na	na	HS-0364	Included	0.94496	yes
MP0378	2016	2016-08-29	na	na	KK-0254A	Included	0.69812	no
MP0379	2016	2016-09-08	na	na	KK-0254A	Not sequenced	NA	NA
MP0380	2016	2016-08-30	2016-09-12	before	KN-0388A	Not sequenced	NA	NA
MP0381	2016	2016-09-02	na	na	KN-0355A	Not sequenced	NA	NA
MP0382	2016	2016-09-02	na	na	KN-0355A	Not sequenced	NA	NA
MP0383	2016	2016-10-06	na	na	MK-0447	Not sequenced	NA	NA
MP0384	2016	2016-10-06	na	na	MK-0265	Included	0.959025	yes
MP0385	2016	2016-09-20	na	na	MK-11014	Not sequenced	NA	NA
MP0386	2016	2016-10-05	na	na	MK-11014	Not sequenced	NA	NA
MP0387	2016	2016-09-13	na	na	PT-0395	Not sequenced	NA	NA
MP0388	2016	2016-10-13	na	na	MK-0427	Not sequenced	NA	NA
MP0389	2016	2016-10-13	na	na	BB-0316	Not sequenced	NA	NA
MP0390	2016	2016-10-10	na	na	BB-0316	Not sequenced	NA	NA
MP0391	2016	2016-09-13	na	na	MP-0440	Included	0.95372	yes
MP0393	2016	2016-09-13	na	na	TM-298C	Included	0.963516	yes
MP0396	2016	2016-09-19	na	na	TM-298C	Included	0.948039	yes
MP0397	2016	2016-09-22	na	na	TM-298C	Low coverage	NA	NA
MP0399	2016	2016-09-23	na	na	HS-0364	Included	0.971061	yes
MP0400	2016	2016-09-29	na	na	HS-0364	Included	0.95843	yes
MP0402	2016	2016-09-26	na	na	PM-0390	Not sequenced	NA	NA
MP0403	2016	2016-09-26	na	na	NP-0400B	Not sequenced	NA	NA
MP0404	2016	2016-09-14	na	na	NP-0400A	Included	0.944553	yes
MP0407	2016	2016-09-30	na	na	KM-11067	Not sequenced	NA	NA
MP0408	2016	2016-10-19	na	na	PS-11064A	Not sequenced	NA	NA
MP0409	2016	2016-10-11	2016-03-18	after	KW-0301A	Not sequenced	NA	NA
MP0410	2016	2016-10-03	2017-07-04	before	NT-0361	Included	0.972296	yes
MP0411	2016	2016-09-12	na	na	MP-0440	Included	0.964807	yes
MP0412	2016	2016-09-13	na	na	MP-0440	Included	0.959629	yes
MP0413	2016	2016-09-16	na	na	MP-0440	Included	0.956535	yes
MP0414	2016	2016-10-11	na	na	HS-0364	Low coverage	NA	NA
MP0415	2016	2016-10-23	na	na	HS-0364	Not sequenced	NA	NA
MP0416	2016	2016-10-12	2017-07-11	before	WM-0367	Not sequenced	NA	NA
MP0417	2016	2016-09-19	na	na	TK-0306	Not sequenced	NA	NA
MP0418	2016	2016-09-20	na	na	TK-0306	Not sequenced	NA	NA
MP0419	2016	2016-09-22	na	na	TK-0306	Not sequenced	NA	NA
MP0420	2016	2016-09-23	na	na	TK-0306	Not sequenced	NA	NA
MP0421	2016	2016-09-21	na	na	TK-0306	Not sequenced	NA	NA
MP0422	2016	2016-09-26	2016-04-13	after	TK-0376	Low coverage	NA	NA
MP0423	2016	2016-09-15	na	na	KH-0213A	Included	0.958238	yes
MP0424	2016	2016-10-03	2016-03-14	after	PL-0327A	Included	0.964106	yes
MP0425	2016	2016-09-30	na	na	NL-0368	Included	0.968613	yes
MP0426	2016	2016-10-17	na	na	TA-0091A	Not sequenced	NA	NA
MP0427	2016	2016-09-20	na	na	MW-0176	Not sequenced	NA	NA
MP0428	2016	2016-09-22	na	na	PN-0196	Not sequenced	NA	NA
MP0429	2016	2016-10-10	na	na	PN-0196	Not sequenced	NA	NA
MP0430	2016	2016-09-12	na	na	CK-11052A	Not sequenced	NA	NA
MP0431	2016	2016-09-13	na	na	NK_11800A	Not sequenced	NA	NA
MP0432	2016	2016-09-23	na	na	KN-0355A	Not sequenced	NA	NA
MP0433	2016	2016-10-17	na	na	KN-0355A	Not sequenced	NA	NA
MP0434	2016	2016-09-29	na	na	KK-0254A	Not sequenced	NA	NA
MP0435	2016	2016-10-14	na	na	KL-0394	Not sequenced	NA	NA
MP0436	2016	2016-09-13	na	na	NK_11800A	Low coverage	NA	NA
MP0437	2016	2016-09-12	na	na	NK_11800A	Not sequenced	NA	NA
MP0438	2016	2016-09-17	na	na	NK_11800A	Not sequenced	NA	NA
MP0439	2016	2016-09-21	na	na	KK-0254A	Included	0.964901	yes
MP0440	2016	2016-09-12	na	na	KK-0254A	Included	0.97354	yes
MP0441	2016	2016-09-12	na	na	KK-0254A	Not sequenced	NA	NA
MP0442	2016	2016-09-20	na	na	KK-0254A	Included	0.976803	yes
MP0443	2016	2016-09-21	na	na	KK-0254A	Not sequenced	NA	NA
MP0444	2016	2016-10-30	na	na	KN-0663	Not sequenced	NA	NA
MP0445	2016	2016-11-08	na	na	YT-0819	Not sequenced	NA	NA
MP0446	2016	2016-09-15	na	na	TY-13125	Not sequenced	NA	NA
MP0447	2016	2016-07-16	na	na	HW-13077	Not sequenced	NA	NA
MP0448	2016	2016-10-25	na	na	KL-11013	Not sequenced	NA	NA
MP0449	2016	2016-11-16	na	na	MN-0377	Not sequenced	NA	NA
MP0450	2016	2016-10-29	na	na	TG-0294	Included	0.97023	yes
MP0452	2016	2016-10-25	na	na	PM-0390	Not sequenced	NA	NA
MP0453	2016	2016-10-24	2015-08-10	after	LT-0259	Not sequenced	NA	NA
MP0454	2016	2016-11-14	na	na	KN-0355A	Low coverage	NA	NA
MP0455	2016	2016-11-16	2015-08-09	after	PD-0372	Included	0.956684	yes
MP0456	2016	2016-11-14	na	na	AR-0264	Not sequenced	NA	NA
MP0457	2016	2016-10-28	na	na	MK-0265	Not sequenced	NA	NA
MP0458	2016	2016-11-15	na	na	NK_11800A	Not sequenced	NA	NA
MP0459	2016	2016-11-16	na	na	NK_11800A	Not sequenced	NA	NA
MP0460	2016	2016-11-14	na	na	TA-0091A	Not sequenced	NA	NA
MP0461	2016	2016-11-15	2015-08-09	after	PD-0372	Included	0.964829	yes
MP0462	2016	2016-11-14	na	na	MM-0181	Not sequenced	NA	NA
MP0463	2016	2016-11-18	na	na	PL-11008A	Not sequenced	NA	NA
MP0464	2016	2016-11-18	na	na	NK_11800A	Not sequenced	NA	NA
MP0465	2016	2016-12-24	na	na	PB-0275	Not sequenced	NA	NA
MP0466	2016	2016-10-24	na	na	KL-11013	Included	0.968852	yes
MP0467	2016	2016-11-18	na	na	HM-0333A	Not sequenced	NA	NA
MP0468	2016	2016-11-17	na	na	PP-11050A	Included	0.958353	yes
MP0469	2016	2016-11-17	na	na	TM-0308	Included	0.945406	yes
MP0470	2016	2016-11-14	2015-02-14	after	BD-0273	Not sequenced	NA	NA
MP0471	2016	2016-11-14	na	na	NK_11800A	Not sequenced	NA	NA
MP0472	2016	2016-11-18	na	na	KL-11013	Included	0.951804	yes
MP0473	2016	2016-11-18	na	na	KL-11013	Included	0.937975	yes
MP0474	2016	2016-11-17	na	na	HM-0333A	Not sequenced	NA	NA
MP0475	2016	2016-11-16	na	na	PP-11050A	Not sequenced	NA	NA
MP0476	2016	2016-11-14	na	na	NB-11054A	Not sequenced	NA	NA
MP0477	2016	2016-11-14	2015-08-09	after	PD-0372	Not sequenced	NA	NA
MP0478	2016	2016-11-17	na	na	NK_11800A	Not sequenced	NA	NA
MP0479	2017	2017-01-03	na	na	PN-0196	Not sequenced	NA	NA
MP0480	2016	2016-10-24	na	na	TD-0085A	Not sequenced	NA	NA
MP0481	2017	2017-02-06	2017-07-03	before	HG-0369	Not sequenced	NA	NA
MP0483	2016	2016-11-15	na	na	KP-0344B	Included	0.931705	yes
MP0484	2016	2016-11-18	na	na	HP-11009	Not sequenced	NA	NA
MP0485	2016	2016-10-19	na	na	LK-0331	Not sequenced	NA	NA
MP0486	2016	2016-10-24	na	na	TK-0306	Not sequenced	NA	NA
MP0487	2016	2016-11-20	na	na	PH-0356A	Not sequenced	NA	NA
MP0488	2016	2016-11-23	na	na	KN-0355A	Not sequenced	NA	NA
MP0491	2016	2016-11-05	2015-02-14	after	BD-0273	Included	0.943415	yes
MP0493	2016	2016-11-04	na	na	AR-0264	Not sequenced	NA	NA
MP0494	2016	2016-11-27	na	na	MK-11014	Included	0.714425	no
MP0495	2016	2016-11-04	na	na	KL-0268A	Included	0.783914	no
MP0496	2016	2016-11-24	na	na	HB-0320A	Not sequenced	NA	NA
MP0497	2016	2016-10-31	na	na	PN-0196	Not sequenced	NA	NA
MP0498	2016	2016-11-24	na	na	LE-0475	Not sequenced	NA	NA
MP0499	2016	2016-10-30	na	na	KK-0254A	Not sequenced	NA	NA
MP0501	2016	2016-11-21	na	na	HB-0320A	Not sequenced	NA	NA
MP0502	2016	2016-11-15	na	na	PT-0395	Not sequenced	NA	NA
MP0503	2016	2016-11-04	2015-08-09	after	PD-0372	Not sequenced	NA	NA
MP0505	2016	2016-10-31	na	na	HB-0320A	Not sequenced	NA	NA
MP0506	2016	2016-11-14	na	na	PT-0395	Not sequenced	NA	NA
MP0507	2016	2016-11-22	na	na	NK_11800A	Low coverage	NA	NA
MP0510	2016	2016-10-31	na	na	KN-0217A	Low coverage	NA	NA
MP0512	2016	2016-11-21	na	na	TM-0308	Not sequenced	NA	NA
MP0513	2016	2016-11-24	na	na	LK-0331	Not sequenced	NA	NA
MP0514	2016	2016-11-24	na	na	LK-0331	Not sequenced	NA	NA
MP0515	2016	2016-11-26	na	na	LK-0331	Not sequenced	NA	NA
MP0516	2016	2016-11-21	na	na	LK-0331	Not sequenced	NA	NA
MP0517	2016	2016-10-31	na	na	HP-0963	Not sequenced	NA	NA
MP0518	2016	2016-11-21	na	na	HL-0365A	Not sequenced	NA	NA
MP0520	2016	2016-10-31	2017-07-04	before	NT-0361	Not sequenced	NA	NA
MP0521	2016	2016-11-21	na	na	KP-0344B	Included	0.942274	yes
MP0522	2016	2016-11-24	na	na	KL-11013	Low coverage	NA	NA
MP0523	2016	2016-11-22	na	na	MN-0377	Not sequenced	NA	NA
MP0524	2016	2016-11-21	na	na	KN-0355A	Not sequenced	NA	NA
MP0526	2016	2016-10-31	na	na	HL-365B	Low coverage	NA	NA
MP0527	2016	2016-12-27	na	na	KL-11013	Not sequenced	NA	NA
MP0528	2016	2016-12-27	na	na	KL-11013	Not sequenced	NA	NA
MP0529	2016	2016-12-29	2020-05-02	before	LH-0266B	Included	0.956356	yes
MP0530	2016	2016-12-29	na	na	MN-0377	Not sequenced	NA	NA
MP0531	2016	2016-12-26	na	na	KL-11013	Not sequenced	NA	NA
MP0532	2016	2016-12-26	na	na	NW-0325A	Not sequenced	NA	NA
MP0533	2016	2016-12-26	na	na	MT-11020A	Not sequenced	NA	NA
MP0534	2016	2016-12-29	na	na	OK-0241	Not sequenced	NA	NA
MP0535	2016	2016-12-31	na	na	NN-0291A	Not sequenced	NA	NA
MP0536	2016	2016-12-21	na	na	PP-0338A	Not sequenced	NA	NA
MP0537	2016	2016-11-12	na	na	NK-0403	Not sequenced	NA	NA
MP0538	2016	2016-12-23	2016-03-19	after	HK-0303A	Not sequenced	NA	NA
MP0540	2016	2016-12-31	na	na	KN-0355A	Not sequenced	NA	NA
MP0542	2016	2016-12-20	na	na	MN-0377	Not sequenced	NA	NA
MP0543	2016	2016-12-20	na	na	PB-0275	Not sequenced	NA	NA
MP0544	2016	2016-12-20	na	na	LS-0223	Not sequenced	NA	NA
MP0546	2016	2016-12-29	na	na	ML-0458A	Not sequenced	NA	NA
MP0547	2016	2016-11-10	na	na	MK-0428	Not sequenced	NA	NA
MP0548	2016	2016-12-29	na	na	MT-11020A	Not sequenced	NA	NA
MP0549	2016	2016-12-30	na	na	PW-0244A	Not sequenced	NA	NA
MP0550	2016	2016-12-19	na	na	MT-0900	Not sequenced	NA	NA
MP0552	2016	2016-12-26	na	na	HB-0320A	Not sequenced	NA	NA
MP0553	2016	2016-12-26	na	na	PW-0244A	Not sequenced	NA	NA
MP0554	2016	2016-12-27	na	na	OK-0241	Included	0.948264	yes
MP0555	2016	2016-12-29	na	na	OK-0241	Low coverage	NA	NA
MP0556	2016	2016-12-29	na	na	PP-0100A	Low coverage	NA	NA
MP0557	2016	2016-12-25	na	na	PT-0395	Not sequenced	NA	NA
MP0558	2016	2016-12-25	na	na	PH-0356A	Included	0.940559	yes
MP0559	2016	2016-12-19	na	na	PP-0338A	Included	0.940603	yes
MP0560	2016	2016-12-28	na	na	DB-0145B	Included	0.946861	yes
MP0561	2016	2016-12-28	na	na	MT-11020A	Not sequenced	NA	NA
MP0562	2016	2016-12-25	na	na	PT-0395	Included	0.943145	yes
MP0563	2016	2016-12-28	na	na	KL-11013	Not sequenced	NA	NA
MP0564	2016	2016-12-26	na	na	KL-11013	Not sequenced	NA	NA
MP0566	2016	2016-12-20	na	na	TM-0308	Low coverage	NA	NA
MP0567	2016	2016-12-26	na	na	KW-11056A	Not sequenced	NA	NA
MP0568	2016	2016-12-28	na	na	TG-0294	Not sequenced	NA	NA
MP0569	2016	2016-12-21	na	na	HS-0364	Included	0.924968	yes
MP0570	2017	2017-01-07	na	na	KN-0174	Not sequenced	NA	NA
MP0571	2017	2017-01-04	na	na	HB-0340A	Low coverage	NA	NA
MP0572	2017	2017-01-03	na	na	MN-0377	Not sequenced	NA	NA
MP0573	2017	2017-01-04	na	na	DB-0145B	Included	0.936005	yes
MP0574	2017	2017-01-04	na	na	PP-11050A	Not sequenced	NA	NA
MP0575	2017	2017-01-04	na	na	LK-0462A	Not sequenced	NA	NA
MP0577	2017	2017-01-07	na	na	HB-0340A	Not sequenced	NA	NA
MP0578	2017	2017-01-02	2016-03-13	after	PH-0336A	Not sequenced	NA	NA
MP0579	2017	2017-01-04	na	na	ML-0458A	Not sequenced	NA	NA
MP0580	2017	2017-01-07	na	na	HB-0340A	Not sequenced	NA	NA
MP0581	2017	2017-01-07	na	na	MP-0440	Included	0.945907	yes
MP0582	2017	2017-01-02	na	na	MN-0377	Not sequenced	NA	NA
MP0585	2017	2017-01-04	na	na	PP-11050A	Not sequenced	NA	NA
MP0587	2017	2017-01-08	na	na	WM-0144	Included	0.956251	yes
MP0590	2017	2017-01-03	na	na	KT-0346B	Included	0.947921	yes
MP0591	2017	2017-01-03	2017-07-11	before	WM-0367	Not sequenced	NA	NA
MP0592	2017	2017-01-08	na	na	PS-0149	Not sequenced	NA	NA
MP0593	2017	2017-01-02	na	na	KP-0344B	Included	0.356882	no
MP0594	2016	2016-01-02	na	na	KP-0344B	Included	0.948877	yes
MP0595	2017	2017-01-05	na	na	HB-0340A	Not sequenced	NA	NA
MP0596	2017	2017-01-05	2017-07-11	before	WM-0367	Not sequenced	NA	NA
MP0597	2017	2017-01-04	na	na	PS-0149	Not sequenced	NA	NA
MP0598	2017	2017-01-07	na	na	HB-0340A	Not sequenced	NA	NA
MP0599	2017	2017-01-03	na	na	MY-11074	Not sequenced	NA	NA
MP0600	2017	2017-01-05	2017-07-11	before	WM-0367	Not sequenced	NA	NA
MP0601	2017	2017-01-07	na	na	HB-0340A	Not sequenced	NA	NA
MP0602	2017	2017-01-05	2015-09-12	after	LN-0163A	Included	0.948635	yes
MP0603	2017	2017-01-07	na	na	MN-0377	Not sequenced	NA	NA
MP0605	2017	2017-01-04	na	na	HB-0340A	Not sequenced	NA	NA
MP0606	2017	2017-01-04	na	na	TR-0414	Not sequenced	NA	NA
MP0607	2016	2016-12-30	na	na	PN-0196	Not sequenced	NA	NA
MP0608	2016	2016-12-19	na	na	KL-11013	Included	0.928901	yes
MP0609	2016	2016-12-23	na	na	MW-0176	Not sequenced	NA	NA
MP0611	2016	2016-12-19	na	na	NB-11054A	Not sequenced	NA	NA
MP0612	2016	2016-12-23	na	na	NN-0291A	Not sequenced	NA	NA
MP0613	2016	2016-12-21	na	na	HM-0333A	Not sequenced	NA	NA
MP0614	2016	2016-12-24	na	na	KL-11013	Not sequenced	NA	NA
MP0616	2016	2016-11-07	2016-03-19	after	MH-0348A	Not sequenced	NA	NA
MP0618	2016	2016-12-19	na	na	NB-11051A	Not sequenced	NA	NA
MP0619	2016	2016-12-24	na	na	KL-11013	Not sequenced	NA	NA
MP0620	2017	2017-11-07	2017-07-11	after	WM-0367	Not sequenced	NA	NA
MP0621	2016	2016-12-29	2015-09-12	after	LN-0163A	Not sequenced	NA	NA
MP0622	2016	2016-12-20	na	na	PW-0244A	Not sequenced	NA	NA
MP0623	2016	2016-12-27	na	na	KL-11013	Not sequenced	NA	NA
MP0624	2016	2016-12-24	na	na	KL-11013	Not sequenced	NA	NA
MP0626	2016	2016-11-07	na	na	TO-11005	Not sequenced	NA	NA
MP0627	2016	2016-12-21	na	na	PP-0338A	Not sequenced	NA	NA
MP0628	2016	2016-12-27	na	na	KL-11013	Not sequenced	NA	NA
MP0629	2016	2016-12-31	na	na	PN-0196	Not sequenced	NA	NA
MP0630	2016	2016-12-20	na	na	MK-0447	Not sequenced	NA	NA
MP0631	2016	2016-12-22	na	na	KL-11013	Not sequenced	NA	NA
MP0632	2016	2016-12-19	na	na	MM-0181	Not sequenced	NA	NA
MP0633	2016	2016-12-21	na	na	MW-0176	Included	0.953947	yes
MP0634	2016	2016-12-23	na	na	HB-0340A	Not sequenced	NA	NA
MP0635	2016	2016-12-20	na	na	MN-0377	Not sequenced	NA	NA
MP0636	2016	2016-12-19	na	na	KL-11013	Low coverage	NA	NA
MP0637	2016	2016-12-22	na	na	KL-11013	Not sequenced	NA	NA
MP0639	2016	2016-12-27	2016-03-19	after	HK-0303A	Not sequenced	NA	NA
MP0640	2016	2016-12-22	na	na	PP-0338A	Not sequenced	NA	NA
MP0641	2016	2016-11-10	na	na	MK-0265	Not sequenced	NA	NA
MP0642	2016	2016-11-11	na	na	PB-0275	Not sequenced	NA	NA
MP0643	2016	2016-11-10	na	na	NK_11800A	Low coverage	NA	NA
MP0644	2016	2016-11-08	na	na	HS-0364	Not sequenced	NA	NA
MP0645	2016	2016-12-23	2016-08-31	after	PL-0366	Not sequenced	NA	NA
MP0646	2016	2016-12-23	na	na	PT-0445	Not sequenced	NA	NA
MP0648	2016	2016-12-20	na	na	KL-11013	Not sequenced	NA	NA
MP0649	2016	2016-12-19	na	na	KP-0344A	Not sequenced	NA	NA
MP0651	2016	2016-11-12	na	na	KP-0344A	Not sequenced	NA	NA
MP0652	2016	2016-11-07	na	na	KP-0344A	Not sequenced	NA	NA
MP0653	2016	2016-12-14	na	na	MT-0342A	Not sequenced	NA	NA
MP0654	2016	2016-11-10	na	na	LK-0331	Not sequenced	NA	NA
MP0655	2016	2016-11-07	na	na	MP-0440	Not sequenced	NA	NA
MP0656	2016	2016-11-08	na	na	HB-0340A	Not sequenced	NA	NA
MP0657	2016	2016-12-20	na	na	LK-0491A	Not sequenced	NA	NA
MP0658	2016	2016-12-31	na	na	MT-207A	Not sequenced	NA	NA
MP0659	2016	2016-12-25	na	na	PT-0395	Low coverage	NA	NA
MP0660	2016	2016-12-21	na	na	BW-0382	Not sequenced	NA	NA
MP0661	2016	2016-12-19	2016-03-18	after	DH-0315A	Not sequenced	NA	NA
MP0662	2016	2016-12-19	na	na	PP-0338A	Not sequenced	NA	NA
MP0663	2016	2016-11-09	na	na	NK_11800A	Not sequenced	NA	NA
MP0664	2016	2016-11-07	2015-08-09	after	PD-0372	Not sequenced	NA	NA
MP0665	2016	2016-11-10	2015-08-09	after	PD-0372	Low coverage	NA	NA
MP0666	2016	2016-12-21	na	na	PL-11008A	Low coverage	NA	NA
MP0668	2016	2016-12-30	na	na	HB-0340A	Not sequenced	NA	NA
MP0670	2016	2016-12-19	na	na	ML-0380A	Included	0.940648	yes
MP0671	2016	2016-11-12	na	na	LK-0331	Not sequenced	NA	NA
MP0672	2016	2016-12-18	2015-08-09	after	PD-0372	Not sequenced	NA	NA
MP0673	2016	2016-12-30	na	na	KP-0344B	Included	0.409945	no
MP0675	2016	2016-12-28	na	na	HB-0340A	Not sequenced	NA	NA
MP0676	2016	2016-12-24	na	na	PT-0445	Not sequenced	NA	NA
MP0678	2016	2016-12-22	na	na	SP-0360A	Not sequenced	NA	NA
MP0679	2017	2017-02-14	na	na	WM-0416A	Not sequenced	NA	NA
MP0681	2017	2017-01-23	2017-07-11	before	WM-0367	Not sequenced	NA	NA
MP0682	2017	2017-02-06	2017-07-11	before	WM-0367	Not sequenced	NA	NA
MP0683	2017	2017-02-17	na	na	KK-0246	Not sequenced	NA	NA
MP0684	2017	2017-02-02	2017-07-11	before	WM-0367	Not sequenced	NA	NA
MP0685	2017	2017-02-17	2015-08-09	after	PD-0372	Not sequenced	NA	NA
MP0686	2017	2017-01-16	na	na	LK-0319A	Included	0.961038	yes
MP0687	2017	2017-01-09	na	na	TK-183A	Not sequenced	NA	NA
MP0688	2017	2017-01-23	2020-05-02	before	LH-0266B	Low coverage	NA	NA
MP0689	2017	2017-02-20	na	na	HK-0277A	Not sequenced	NA	NA
MP0690	2017	2017-01-11	na	na	KB-0148	Low coverage	NA	NA
MP0691	2017	2017-01-13	na	na	KP-0344A	Included	0.934247	yes
MP0692	2017	2017-01-19	2015-08-09	after	DL-0187A	Included	0.942909	yes
MP0694	2017	2017-01-14	na	na	HB-0340A	Included	0.924564	yes
MP0695	2017	2017-02-08	na	na	KK-0254A	Not sequenced	NA	NA
MP0696	2017	2017-02-14	na	na	MT-0342A	Included	0.95813	yes
MP0697	2017	2017-02-14	na	na	KK-0254A	Not sequenced	NA	NA
MP0698	2017	2017-02-21	na	na	KL-11013	Not sequenced	NA	NA
MP0699	2017	2017-02-03	2017-07-11	before	WM-0367	Not sequenced	NA	NA
MP0700	2017	2017-02-11	na	na	BK-0420A	Not sequenced	NA	NA
MP0701	2017	2017-01-17	2016-09-02	after	MG-0261A	Not sequenced	NA	NA
MP0702	2017	2017-02-04	2017-07-11	before	WM-0367	Not sequenced	NA	NA
MP0703	2017	2017-01-13	na	na	LK-0319A	Not sequenced	NA	NA
MP0705	2017	2017-01-23	na	na	LP-0448A	Not sequenced	NA	NA
MP0706	2017	2017-02-15	2015-08-09	after	PD-0372	Not sequenced	NA	NA
MP0707	2017	2017-02-02	na	na	MW-0176	Not sequenced	NA	NA
MP0708	2017	2017-01-21	na	na	HL-0221A	Not sequenced	NA	NA
MP0709	2017	2017-01-23	na	na	KL-0394	Not sequenced	NA	NA
MP0710	2017	2017-02-05	na	na	ML-0515	Not sequenced	NA	NA
MP0711	2017	2017-02-06	na	na	KL-11013	Not sequenced	NA	NA
MP0712	2017	2017-01-13	na	na	KL-11013	Not sequenced	NA	NA
MP0713	2016	2016-01-11	2016-03-18	before	DH-0315A	Not sequenced	NA	NA
MP0714	2017	2017-02-17	na	na	MP-0440	Not sequenced	NA	NA
MP0715	2017	2017-02-03	na	na	NB-11054A	Not sequenced	NA	NA
MP0716	2017	2017-01-18	2015-09-07	after	BP-0321A	Not sequenced	NA	NA
MP0717	2017	2017-02-07	na	na	LK-0462A	Not sequenced	NA	NA
MP0718	2017	2017-02-15	na	na	MN-0377	Not sequenced	NA	NA
MP0720	2017	2017-02-22	na	na	ML-0380A	Not sequenced	NA	NA
MP0722	2017	2017-01-14	na	na	NK_11800A	Not sequenced	NA	NA
MP0723	2017	2017-01-09	na	na	CK-11052A	Not sequenced	NA	NA
MP0726	2017	2017-01-31	na	na	KK-0254A	Not sequenced	NA	NA
MP0727	2017	2017-02-14	na	na	TM-0308	Not sequenced	NA	NA
MP0728	2017	2017-02-11	na	na	HT-0378A	Not sequenced	NA	NA
MP0732	2017	2017-02-09	na	na	TK-183A	Included	0.954218	yes
MP0733	2017	2017-01-15	na	na	HB-0340A	Not sequenced	NA	NA
MP0734	2017	2017-01-30	na	na	PP-0338A	Low coverage	NA	NA
MP0735	2017	2017-02-11	na	na	PT-0445	Not sequenced	NA	NA
MP0737	2017	2017-02-21	na	na	NB-11051A	Not sequenced	NA	NA
MP0738	2017	2017-01-12	na	na	PP-11050A	Not sequenced	NA	NA
MP0739	2017	2017-02-15	na	na	BK-0420A	Not sequenced	NA	NA
MP0740	2017	2017-02-01	na	na	PH-0356B	Included	0.937297	yes
MP0741	2017	2017-01-11	na	na	TM-0308	Not sequenced	NA	NA
MP0742	2017	2017-01-24	na	na	LK-0319A	Not sequenced	NA	NA
MP0743	2017	2017-01-14	na	na	HB-0340A	Included	0.932589	yes
MP0744	2017	2017-02-16	na	na	TM-298C	Low coverage	NA	NA
MP0746	2017	2017-02-13	na	na	KL-11013	Included	0.943284	yes
MP0747	2017	2017-12-20	na	na	PP-11050A	Not sequenced	NA	NA
MP0748	2017	2017-02-08	na	na	MN-0377	Not sequenced	NA	NA
MP0749	2017	2017-01-16	na	na	NB-11054A	Included	0.953417	yes
MP0750	2017	2017-01-19	2016-03-13	after	TK-0384A	Not sequenced	NA	NA
MP0751	2017	2017-02-07	na	na	BT-0353B	Included	0.925952	yes
MP0752	2017	2017-01-10	na	na	PP-11050A	Included	0.943085	yes
MP0753	2017	2017-12-14	2020-05-02	before	LH-0266B	Low coverage	NA	NA
MP0754	2017	2017-02-10	2017-07-11	before	WM-0367	Not sequenced	NA	NA
MP0756	2017	2017-02-24	2015-08-09	after	DL-0187A	Included	0.95327	yes
MP0757	2017	2017-01-15	na	na	HB-0340A	Not sequenced	NA	NA
MP0758	2017	2017-02-20	na	na	TM-298C	Included	0.959421	yes
MP0759	2017	2017-02-21	na	na	TM-298C	Included	0.597776	no
MP0760	2017	2017-02-16	2015-09-12	after	LN-0163A	Not sequenced	NA	NA
MP0761	2017	2017-02-14	na	na	PW-0244A	Not sequenced	NA	NA
MP0762	2017	2017-01-30	na	na	PP-11050A	Included	0.948471	yes
MP0763	2017	2017-01-31	2017-07-11	before	WM-0367	Not sequenced	NA	NA
MP0765	2017	2017-02-14	na	na	KL-11013	Not sequenced	NA	NA
MP0766	2017	2017-01-30	2017-07-11	before	WM-0367	Not sequenced	NA	NA
MP0767	2017	2017-02-24	na	na	AR-0267A	Included	0.948286	yes
MP0768	2017	2017-02-09	na	na	WM-0416B	Included	0.958625	yes
MP0769	2017	2017-01-11	na	na	OK-0241	Not sequenced	NA	NA
MP0770	2017	2017-01-30	na	na	HS-0364	Not sequenced	NA	NA
MP0772	2017	2017-01-15	na	na	PN-0196	Included	0.94259	yes
MP0774	2017	2017-01-31	na	na	PN-0196	Not sequenced	NA	NA
MP0775	2017	2017-02-02	2017-07-11	before	WM-0367	Not sequenced	NA	NA
MP0776	2017	2017-02-11	na	na	PP-11050A	Not sequenced	NA	NA
MP0777	2017	2017-01-19	2015-09-07	after	BP-0321A	Included	0.946611	yes
MP0778	2017	2017-02-06	na	na	PL-0379	Not sequenced	NA	NA
MP0779	2017	2017-02-09	na	na	MK-11047	Not sequenced	NA	NA
MP0780	2017	2017-02-13	na	na	DL-0187B	Included	0.961447	yes
MP0781	2017	2017-01-12	na	na	LK-0319A	Included	0.951068	yes
MP0782	2017	2017-01-14	na	na	LK-0319A	Not sequenced	NA	NA
MP0783	2017	2017-01-13	2017-07-11	before	WM-0367	Not sequenced	NA	NA
MP0784	2017	2017-01-28	na	na	MT-0342A	Not sequenced	NA	NA
MP0785	2017	2017-01-23	2020-05-02	before	LH-0266B	Included	0.938155	yes
MP0786	2017	2017-02-03	2017-07-11	before	WM-0367	Not sequenced	NA	NA
MP0787	2017	2017-02-14	na	na	KK-0254A	Not sequenced	NA	NA
MP0788	2017	2017-01-25	na	na	DL-0187B	Included	0.936646	yes
MP0789	2017	2017-02-08	na	na	MK-11047	Included	0.95371	yes
MP0790	2017	2017-02-20	na	na	KN-0355A	Not sequenced	NA	NA
MP0791	2017	2017-02-17	2015-08-09	after	PD-0372	Not sequenced	NA	NA
MP0792	2017	2017-01-30	2017-07-11	before	WM-0367	Not sequenced	NA	NA
MP0793	2017	2017-01-20	na	na	PH-0356A	Included	0.918454	yes
MP0794	2017	2017-02-25	na	na	KL-11013	Not sequenced	NA	NA
MP0795	2017	2017-02-14	na	na	KL-11013	Not sequenced	NA	NA
MP0796	2017	2017-01-26	na	na	NL-0368	Included	0.84119	no
MP0797	2017	2017-02-01	2015-08-09	after	PD-0372	Not sequenced	NA	NA
MP0798	2017	2017-02-06	na	na	KL-11013	Not sequenced	NA	NA
MP0800	2017	2017-02-16	na	na	TM-0308	Included	0.949509	yes
MP0801	2017	2017-01-19	2017-07-11	before	WM-0367	Not sequenced	NA	NA
MP0802	2017	2017-02-16	2017-07-11	before	WM-0367	Not sequenced	NA	NA
MP0803	2017	2017-02-03	2017-07-11	before	WM-0367	Not sequenced	NA	NA
MP0804	2017	2017-02-02	na	na	KM-11066	Not sequenced	NA	NA
MP0805	2016	2016-01-16	2016-03-18	before	DH-0315A	Not sequenced	NA	NA
MP0806	2017	2017-02-20	na	na	HS-0364	Not sequenced	NA	NA
MP0808	2017	2017-02-13	na	na	KL-11013	Not sequenced	NA	NA
MP0809	2017	2017-02-13	na	na	MK-11047	Not sequenced	NA	NA
MP0810	2017	2017-02-13	na	na	MK-11047	Not sequenced	NA	NA
MP0811	2017	2017-01-09	na	na	TM-0308	Not sequenced	NA	NA
MP0812	2017	2017-01-10	na	na	PP-11050A	Not sequenced	NA	NA
MP0813	2017	2017-02-04	2017-07-11	before	WM-0367	Not sequenced	NA	NA
MP0816	2017	2017-02-09	na	na	MN-0377	Not sequenced	NA	NA
MP0817	2017	2017-02-16	2015-08-09	after	PD-0372	Not sequenced	NA	NA
MP0819	2017	2017-01-09	na	na	KK-0254A	Not sequenced	NA	NA
MP0821	2017	2017-02-17	na	na	MW-0176	Not sequenced	NA	NA
MP0822	2017	2017-01-25	na	na	TM-0308	Included	0.947593	yes
MP0824	2017	2017-01-24	2016-09-12	after	KN-0388A	Not sequenced	NA	NA
MP0825	2017	2017-01-22	na	na	HB-0340A	Not sequenced	NA	NA
MP0826	2017	2017-02-14	na	na	MN-0377	Not sequenced	NA	NA
MP0828	2017	2017-01-10	na	na	MK-0428	Not sequenced	NA	NA
MP0829	2017	2017-01-25	na	na	PL-11008A	Included	0.848059	no
MP0831	2017	2017-01-10	2016-09-02	after	MG-0261A	Not sequenced	NA	NA
MP0832	2017	2017-01-13	na	na	KP-0344A	Not sequenced	NA	NA
MP0833	2017	2017-01-20	na	na	KP-0344A	Included	0.951559	yes
MP0834	2017	2017-01-15	na	na	HB-0340A	Not sequenced	NA	NA
MP0836	2017	2017-02-11	na	na	MK-0426	Not sequenced	NA	NA
MP0837	2017	2017-01-31	na	na	MP-0440	Not sequenced	NA	NA
MP0838	2017	2017-02-21	na	na	KL-11013	Not sequenced	NA	NA
MP0840	2017	2017-01-18	na	na	MP-0440	Not sequenced	NA	NA
MP0841	2017	2017-01-12	na	na	TD-0279	Not sequenced	NA	NA
MP0842	2017	2017-01-01	na	na	CK-11052A	Not sequenced	NA	NA
MP0843	2017	2017-01-10	na	na	WM-0416B	Included	0.953204	yes
MP0844	2017	2017-01-19	2020-05-02	before	LH-0266B	Included	0.942551	yes
MP0845	2017	2017-02-26	2017-07-03	before	HG-0369	Not sequenced	NA	NA
MP0846	2017	2017-02-15	2016-03-13	after	TK-0384A	Not sequenced	NA	NA
MP0848	2017	2017-01-30	na	na	CK-11052A	Not sequenced	NA	NA
MP0849	2017	2017-01-24	2017-07-11	before	WM-0367	Included	0.912891	yes
MP0850	2017	2017-01-13	na	na	NL-0029A	Not sequenced	NA	NA
MP0851	2017	2017-01-14	2015-08-09	after	PD-0372	Not sequenced	NA	NA
MP0852	2017	2017-01-25	2017-07-11	before	WM-0367	Included	0.947687	yes
MP0853	2017	2017-02-13	na	na	TM-0308	Not sequenced	NA	NA
MP0854	2017	2017-02-03	na	na	PL-11008A	Not sequenced	NA	NA
MP0855	2017	2017-02-13	na	na	MK-11047	Included	0.946281	yes
MP0856	2017	2017-02-02	na	na	MP-0440	Not sequenced	NA	NA
MP0858	2017	2017-01-31	na	na	WT-11053A	Included	0.964045	yes
MP0859	2017	2017-02-14	2020-05-02	before	LH-0266B	Included	0.956849	yes
MP0860	2017	2017-01-26	2015-09-12	after	PK-0328A	Not sequenced	NA	NA
MP0861	2017	2017-01-18	na	na	MT-11020A	Not sequenced	NA	NA
MP0862	2017	2017-01-24	na	na	KW-0296A	Not sequenced	NA	NA
MP0864	2017	2017-01-19	na	na	PK-0442	Not sequenced	NA	NA
MP0866	2017	2017-01-20	na	na	MW-0176	Not sequenced	NA	NA
MP0867	2017	2017-02-01	2017-07-11	before	WM-0367	Not sequenced	NA	NA
MP0868	2017	2017-02-03	2017-07-11	before	WM-0367	Not sequenced	NA	NA
MP0869	2017	2017-02-04	na	na	KL-11013	Not sequenced	NA	NA
MP0870	2017	2017-01-16	na	na	MT-11020A	Not sequenced	NA	NA
MP0871	2017	2017-02-03	2016-08-31	after	PL-0366	Not sequenced	NA	NA
MP0872	2017	2017-02-06	na	na	WM-0416A	Not sequenced	NA	NA
MP0873	2017	2017-02-09	na	na	WM-0416A	Not sequenced	NA	NA
MP0875	2017	2017-01-24	na	na	HS-0364	Not sequenced	NA	NA
MP0876	2017	2017-02-07	na	na	CK-11052A	Included	0.958148	yes
MP0877	2017	2017-02-21	2015-08-09	after	PD-0372	Not sequenced	NA	NA
MP0878	2017	2017-01-23	2016-03-13	after	PH-0336A	Not sequenced	NA	NA
MP0880	2017	2017-01-16	na	na	WM-0416B	Not sequenced	NA	NA
MP0887	2017	2017-02-22	na	na	KK-0481	Not sequenced	NA	NA
MP0888	2017	2017-01-23	na	na	KW-0473	Not sequenced	NA	NA
MP0889	2017	2017-02-02	na	na	BK-12278	Not sequenced	NA	NA
MP0891	2017	2017-01-30	na	na	MK-0648	Not sequenced	NA	NA
MP0892	2016	2016-08-25	2016-09-02	before	MC-0396A	Not sequenced	NA	NA
MP0893	2016	2016-08-22	2016-03-13	after	PH-0336A	Included	0.945671	yes
MP0896	2016	2016-06-23	na	na	HP-0683	Not sequenced	NA	NA
MP0897	2016	2016-10-30	na	na	HW-0842	Not sequenced	NA	NA
MP0898	2017	2017-01-01	na	na	KT-0618	Not sequenced	NA	NA
MP0899	2016	2016-08-15	na	na	SA-0710	Not sequenced	NA	NA
MP0900	2016	2016-06-28	na	na	HP-0683	Not sequenced	NA	NA
MP0902	2016	2016-08-31	2016-03-14	after	PL-0327A	Not sequenced	NA	NA
MP0903	2016	2016-06-15	na	na	HW-13077	Not sequenced	NA	NA
MP0904	2016	2016-09-08	na	na	MP-0440	Not sequenced	NA	NA
MP0905	2016	2016-06-20	na	na	HW-13077	Not sequenced	NA	NA
MP0906	2016	2016-12-09	na	na	HP-13070	Not sequenced	NA	NA
MP0908	2016	2016-11-08	na	na	TM-0578	Not sequenced	NA	NA
MP0909	2017	2017-03-08	na	na	HB-0320A	Not sequenced	NA	NA
MP0910	2017	2017-03-13	na	na	MN-0377	Not sequenced	NA	NA
MP0911	2017	2017-03-20	na	na	BB-0316	Not sequenced	NA	NA
MP0912	2017	2017-03-13	na	na	PP-11050A	Not sequenced	NA	NA
MP0913	2017	2017-03-06	na	na	KL-11013	Not sequenced	NA	NA
MP0914	2017	2017-04-24	2017-07-11	before	WM-0367	Not sequenced	NA	NA
MP0915	2017	2017-03-20	na	na	KL-11013	Not sequenced	NA	NA
MP0916	2017	2017-02-27	2016-03-13	after	PH-0336A	Not sequenced	NA	NA
MP0917	2017	2017-02-28	na	na	HB-0320A	Not sequenced	NA	NA
MP0918	2017	2017-02-20	na	na	HB-0320A	Not sequenced	NA	NA
MP0919	2017	2017-03-13	na	na	BB-0316	Not sequenced	NA	NA
MP0920	2017	2017-03-20	na	na	HL-0365A	Not sequenced	NA	NA
MP0921	2017	2017-03-20	na	na	TM-0308	Included	0.946771	yes
MP0926	2017	2017-02-07	na	na	HS-0364	Not sequenced	NA	NA
MP0927	2017	2017-03-08	2015-08-09	after	PD-0372	Not sequenced	NA	NA
MP0928	2017	2017-03-21	na	na	TM-0308	Not sequenced	NA	NA
MP0929	2017	2017-03-22	na	na	KP-0344A	Not sequenced	NA	NA
MP0930	2017	2017-02-28	na	na	KP-0344A	Included	0.961891	yes
MP0931	2017	2017-03-23	na	na	KK-12301	Not sequenced	NA	NA
MP0932	2017	2017-03-06	na	na	KP-0818	Included	0.963719	yes
MP0933	2017	2017-03-13	na	na	KP-0818	Not sequenced	NA	NA
MP0934	2017	2017-03-22	na	na	KP-0818	Not sequenced	NA	NA
MP0935	2017	2017-03-06	na	na	KL-11013	Not sequenced	NA	NA
MP0936	2017	2017-03-20	na	na	TM-0308	Included	0.947673	yes
MP0937	2017	2017-03-06	na	na	HB-0320A	Not sequenced	NA	NA
MP0939	2017	2017-02-27	na	na	PP-11050A	Included	0.931811	yes
MP0940	2017	2017-03-06	2016-03-18	after	DH-0315A	Not sequenced	NA	NA
MP0941	2017	2017-02-28	na	na	HB-0320A	Not sequenced	NA	NA
MP0942	2017	2017-03-16	na	na	KL-11013	Included	0.930819	yes
MP0943	2017	2017-03-08	na	na	HB-0320A	Not sequenced	NA	NA
MP0944	2017	2017-03-20	na	na	KK-0254A	Not sequenced	NA	NA
MP0945	2017	2017-03-14	na	na	NW-0325A	Not sequenced	NA	NA
MP0946	2017	2017-03-22	na	na	TM-0308	Not sequenced	NA	NA
MP0947	2017	2017-03-16	na	na	PP-11050A	Included	0.959532	yes
MP0948	2017	2017-03-22	2017-07-11	before	WM-0367	Not sequenced	NA	NA
MP0949	2017	2017-03-17	2016-03-18	after	DH-0315A	Not sequenced	NA	NA
MP0950	2017	2017-03-18	na	na	TK-183A	Not sequenced	NA	NA
MP0951	2017	2017-03-09	na	na	KK-11032	Included	0.961631	yes
MP0952	2017	2017-03-06	na	na	TM-0308	Included	0.949589	yes
MP0953	2017	2017-03-14	na	na	TM-0308	Included	0.958625	yes
MP0954	2017	2017-03-06	na	na	HB-0320A	Not sequenced	NA	NA
MP0955	2017	2017-03-10	na	na	NL-0368	Not sequenced	NA	NA
MP0956	2017	2017-03-09	na	na	CK-11052A	Included	0.951127	yes
MP0957	2017	2017-02-28	na	na	KK-0254A	Included	0.961925	yes
MP0958	2017	2017-03-18	na	na	CK-11052A	Not sequenced	NA	NA
MP0959	2017	2017-03-22	na	na	PP-11050A	Included	0.962796	yes
MP0960	2017	2017-02-27	na	na	CK-11052A	Included	0.946726	yes
MP0961	2017	2017-03-22	2017-07-11	before	WM-0367	Included	0.911945	yes
MP0962	2017	2017-03-10	2016-03-18	after	DH-0315A	Not sequenced	NA	NA
MP0963	2017	2017-03-12	na	na	HB-0320A	Included	0.938079	yes
MP0964	2017	2017-03-13	na	na	HB-0320A	Not sequenced	NA	NA
MP0965	2017	2017-02-28	na	na	NB-11054A	Not sequenced	NA	NA
MP0966	2017	2017-03-22	na	na	LW-0310A	Not sequenced	NA	NA
MP0967	2017	2017-03-04	na	na	MK-0428	Included	0.935863	yes
MP0968	2017	2017-03-06	na	na	KN-0355A	Included	0.897349	yes
MP0969	2017	2017-03-06	na	na	KN-0355A	Included	0.885951	no
MP0970	2017	2017-03-07	na	na	KN-0355A	Not sequenced	NA	NA
MP0971	2017	2017-01-27	na	na	NH-0402A	Included	0.954461	yes
MP0972	2017	2017-02-28	na	na	KK-0254A	Included	0.89152	no
MP0973	2017	2017-03-07	na	na	PP-11050A	Included	0.910686	yes
MP0974	2017	2017-03-08	na	na	HB-0320A	Included	0.91772	yes
MP0975	2017	2017-03-15	na	na	CK-11052A	Included	0.91475	yes
MP0976	2017	2017-03-16	na	na	BT-0353B	Included	0.903995	yes
MP0977	2017	2017-02-27	na	na	TM-0308	Not sequenced	NA	NA
MP0978	2017	2017-03-20	na	na	BB-0316	Included	0.901627	yes
MP0980	2017	2017-04-22	na	na	NK_11800A	Included	0.921456	yes
MP0982	2017	2017-04-28	2015-08-09	after	PD-0372	Not sequenced	NA	NA
MP0983	2017	2017-04-24	na	na	KN-0355A	Not sequenced	NA	NA
MP0984	2017	2017-04-24	na	na	PP-0338A	Not sequenced	NA	NA
MP0985	2017	2017-04-29	na	na	TY-0329	Not sequenced	NA	NA
MP0986	2017	2017-04-24	na	na	KL-11013	Included	0.91531	yes
MP0987	2017	2017-04-24	na	na	KL-11013	Not sequenced	NA	NA
MP0988	2017	2017-04-27	na	na	MK-11003	Not sequenced	NA	NA
MP0991	2017	2017-04-24	na	na	MK-0265	Not sequenced	NA	NA
MP0992	2017	2017-04-24	na	na	PP-11050A	Not sequenced	NA	NA
MP0993	2017	2017-04-24	na	na	PP-11050A	Included	0.904547	yes
MP0994	2017	2017-04-25	na	na	PP-11050A	Not sequenced	NA	NA
MP0995	2017	2017-04-26	na	na	TK-183A	Included	0.912442	yes
MP0996	2017	2017-04-24	na	na	TK-183A	Not sequenced	NA	NA
MP0997	2017	2017-04-26	na	na	KK-11032	Not sequenced	NA	NA
MP0998	2017	2017-04-24	na	na	MM-11004	Not sequenced	NA	NA
MP0999	2017	2017-04-27	na	na	KK-11032	Not sequenced	NA	NA
MP1000	2017	2017-04-25	na	na	KH-0213A	Not sequenced	NA	NA
MP1002	2016	2016-04-26	na	na	KN-0355A	Included	0.903295	yes
MP1003	2017	2017-04-25	2017-07-11	before	WM-0367	Not sequenced	NA	NA
MP1004	2017	2017-04-25	2017-07-11	before	WM-0367	Not sequenced	NA	NA
MP1005	2017	2017-04-26	2016-03-14	after	PL-0327A	Low coverage	NA	NA
MP1006	2017	2017-04-25	na	na	MT-11020A	Not sequenced	NA	NA
MP1007	2017	2017-04-25	na	na	TK-183A	Not sequenced	NA	NA
MP1008	2017	2017-04-25	na	na	LK-0331	Not sequenced	NA	NA
MP1009	2017	2017-02-21	2017-07-03	before	HG-0369	Not sequenced	NA	NA
MP1010	2017	2017-02-03	na	na	MT-11020A	Not sequenced	NA	NA
MP1011	2017	2017-02-04	2017-07-03	before	HG-0369	Included	0.903074	yes
MP1012	2017	2017-02-06	na	na	MT-11020A	Not sequenced	NA	NA
MP1013	2017	2017-01-30	2017-07-03	before	HG-0369	Not sequenced	NA	NA
MP1014	2017	2017-02-13	2017-07-03	before	HG-0369	Not sequenced	NA	NA
MP1015	2017	2017-02-02	2017-07-03	before	HG-0369	Not sequenced	NA	NA
MP1016	2017	2017-02-02	na	na	MT-11020A	Not sequenced	NA	NA
MP1017	2017	2017-02-22	na	na	TM-0308	Not sequenced	NA	NA
MP1018	2017	2017-02-10	na	na	HB-0340A	Not sequenced	NA	NA
MP1019	2017	2017-01-23	na	na	TK-0306	Not sequenced	NA	NA
MP1020	2017	2017-01-18	2015-08-09	after	PD-0372	Included	0.923472	yes
MP1021	2017	2017-01-10	na	na	TK-0306	Not sequenced	NA	NA
MP1022	2017	2017-01-11	na	na	TK-0306	Not sequenced	NA	NA
MP1023	2017	2017-01-17	2015-08-09	after	PD-0372	Not sequenced	NA	NA
MP1024	2017	2017-01-15	na	na	TG-250A	Not sequenced	NA	NA
MP1025	2017	2017-01-13	na	na	MN-0377	Not sequenced	NA	NA
MP1026	2017	2017-01-17	na	na	MN-0377	Not sequenced	NA	NA
MP1027	2017	2017-01-17	na	na	MN-0377	Not sequenced	NA	NA
MP1028	2016	2016-09-09	na	na	KH-0213A	Not sequenced	NA	NA
MP1029	2016	2016-09-05	na	na	KH-0213A	Not sequenced	NA	NA
MP1030	2016	2016-09-09	na	na	KH-0213A	Not sequenced	NA	NA
MP1031	2016	2016-11-25	na	na	BB-0316	Not sequenced	NA	NA
MP1032	2016	2016-11-26	na	na	BB-0316	Not sequenced	NA	NA
MP1033	2016	2016-10-31	na	na	BB-0316	Not sequenced	NA	NA
MP1034	2016	2016-11-20	na	na	MP-0440	Included	0.922184	yes
MP1035	2016	2016-10-25	na	na	MP-0440	Not sequenced	NA	NA
MP1036	2016	2016-11-03	na	na	PP-11050A	Included	0.932533	yes
MP1037	2016	2016-09-10	na	na	KH-0213A	Not sequenced	NA	NA
MP1038	2016	2016-09-10	na	na	KH-0213A	Not sequenced	NA	NA
MP1039	2016	2016-11-21	na	na	MP-0440	Included	0.925953	yes
MP1040	2017	2017-01-03	na	na	KL-11013	Not sequenced	NA	NA
MP1041	2017	2017-01-07	na	na	KL-11013	Not sequenced	NA	NA
MP1042	2016	2016-11-07	na	na	KK-0254A	Not sequenced	NA	NA
MP1043	2017	2017-01-04	na	na	KL-11013	Not sequenced	NA	NA
MP1044	2017	2017-01-07	na	na	KL-11013	Included	0.928655	yes
MP1045	2017	2017-01-05	na	na	KL-11013	Not sequenced	NA	NA
MP1046	2016	2016-11-10	na	na	KK-0254A	Not sequenced	NA	NA
MP1047	2016	2016-11-07	na	na	KK-0254A	Not sequenced	NA	NA
MP1048	2017	2017-01-05	na	na	KL-11013	Not sequenced	NA	NA
MP1049	2017	2017-01-05	na	na	KL-11013	Not sequenced	NA	NA
MP1050	2017	2017-01-06	na	na	KL-11013	Not sequenced	NA	NA
MP1052	2017	2017-07-27	2017-06-30	after	MK-363C	Included	0.933267	yes
MP1053	2017	2017-08-11	na	na	NA	Not sequenced	NA	NA
MP1055	2017	2017-04-27	na	na	NA	Not sequenced	NA	NA
MP1056	2017	2017-05-08	na	na	NA	Included	0.933522	yes
MP1057	2017	2017-05-16	na	na	NA	Not sequenced	NA	NA
MP1058	2017	2017-05-16	na	na	NA	Not sequenced	NA	NA
MP1059	2017	2017-06-25	na	na	NA	Not sequenced	NA	NA
MP1060	2017	2017-05-30	na	na	NA	Included	0.916948	yes
MP1061	2017	2017-06-21	na	na	NA	Included	0.917273	yes
MP1062	2017	2017-07-04	na	na	NA	Included	0.916179	yes
MP1063	2017	2017-06-26	na	na	NA	Included	0.910497	yes
MP1064	2017	2017-07-19	na	na	NA	Not sequenced	NA	NA
MP1065	2017	2017-05-03	na	na	NA	Not sequenced	NA	NA
MP1066	2017	2017-06-10	na	na	HS-839	Not sequenced	NA	NA
MP1067	2017	2017-05-24	na	na	KK-0824	Included	0.917215	yes
MP1068	2017	2017-05-07	na	na	TL-0797	Included	0.92536	yes
MP1069	2017	2017-06-13	na	na	YT-0819	Not sequenced	NA	NA
MP1070	2017	2017-08-18	2017-07-11	after	WM-0367	Not sequenced	NA	NA
MP1071	2017	2017-08-25	2016-03-14	after	HR-0318A	Included	0.910292	yes
MP1072	2017	2017-08-01	2016-03-14	after	PL-0327A	Not sequenced	NA	NA
MP1074	2017	2017-08-01	na	na	LE-0475	Not sequenced	NA	NA
MP1075	2017	2017-07-01	na	na	PH-0356A	Not sequenced	NA	NA
MP1076	2017	2017-08-17	na	na	MK-0426	Not sequenced	NA	NA
MP1077	2017	2017-08-14	na	na	TY-0329	Included	0.898197	yes
MP1080	2017	2017-08-21	2016-09-02	after	MG-0261A	Included	0.922471	yes
MP1082	2017	2017-07-31	na	na	LE-0475	Not sequenced	NA	NA
MP1083	2017	2017-08-09	na	na	ML-0380A	Not sequenced	NA	NA
MP1084	2017	2017-08-01	na	na	KL-0268A	Included	0.884891	no
MP1085	2017	2017-08-09	na	na	BB-0316	Not sequenced	NA	NA
MP1086	2017	2017-08-10	na	na	HB-0320A	Included	0.924173	yes
MP1087	2017	2017-08-16	na	na	PH-0356B	Included	0.925167	yes
MP1088	2017	2017-08-18	na	na	TR-11006	Not sequenced	NA	NA
MP1089	2017	2017-08-15	na	na	KL-0268E	Included	0.92143	yes
MP1092	2017	2017-08-15	na	na	KK-0246	Not sequenced	NA	NA
MP1093	2017	2017-08-18	na	na	TR-11006	Not sequenced	NA	NA
MP1095	2017	2017-08-07	na	na	BT-0353B	Included	0.922403	yes
MP1096	2017	2017-08-20	na	na	MK-0447	Not sequenced	NA	NA
MP1097	2017	2017-08-21	2015-08-09	after	PD-0372	Not sequenced	NA	NA
MP1098	2017	2017-08-01	na	na	HB-11007	Not sequenced	NA	NA
MP1099	2017	2017-08-14	na	na	TK-0459	Not sequenced	NA	NA
MP1100	2017	2017-08-14	na	na	MK-0447	Not sequenced	NA	NA
MP1102	2017	2017-08-05	2015-09-07	after	BP-0321A	Not sequenced	NA	NA
MP1103	2017	2017-08-08	na	na	LK-0331	Not sequenced	NA	NA
MP1104	2017	2017-08-02	na	na	DB-0145A	Included	0.922698	yes
MP1105	2017	2017-07-31	2016-03-14	after	PL-0327A	Not sequenced	NA	NA
MP1107	2017	2017-08-15	na	na	MK-0447	Not sequenced	NA	NA
MP1108	2017	2017-08-03	2016-09-03	after	WT-0314A	Not sequenced	NA	NA
MP1109	2017	2017-08-09	na	na	MK-0447	Not sequenced	NA	NA
MP1111	2017	2017-08-14	na	na	MK-0426	Not sequenced	NA	NA
MP1112	2017	2017-08-09	na	na	TK-0459	Not sequenced	NA	NA
MP1115	2017	2017-08-11	na	na	PH-0356B	Included	0.926579	yes
MP1116	2017	2017-08-02	na	na	KL-0394	Not sequenced	NA	NA
MP1117	2017	2017-08-02	na	na	KN-0355A	Not sequenced	NA	NA
MP1118	2017	2017-08-02	na	na	ML-0380A	Included	0.919871	yes
MP1119	2017	2017-08-01	2016-03-14	after	PL-0327A	Not sequenced	NA	NA
MP1120	2017	2017-08-17	na	na	BB-0316	Included	0.913547	yes
MP1122	2017	2017-07-31	2015-09-12	after	HT-0323	Not sequenced	NA	NA
MP1123	2017	2017-08-07	na	na	LK-0331	Included	0.922845	yes
MP1124	2017	2017-08-07	2015-08-09	after	PD-0372	Not sequenced	NA	NA
MP1125	2017	2017-08-12	na	na	NK-0403	Included	0.94128	yes
MP1126	2017	2017-08-31	2020-05-02	before	LH-0266B	Not sequenced	NA	NA
MP1127	2017	2017-08-08	2015-08-09	after	PD-0372	Not sequenced	NA	NA
MP1128	2017	2017-08-01	na	na	DB-0145B	Included	0.931022	yes
MP1129	2017	2017-08-05	na	na	MK-0426	Included	0.919854	yes
MP1130	2017	2017-08-07	2015-08-09	after	PD-0372	Not sequenced	NA	NA
MP1131	2017	2017-08-05	na	na	KN-0355A	Not sequenced	NA	NA
MP1132	2017	2017-05-01	2016-03-14	after	PL-0327A	Not sequenced	NA	NA
MP1134	2017	2017-08-16	na	na	KN-0217A	Not sequenced	NA	NA
MP1135	2017	2017-05-27	2017-07-12	before	HD-0363D	Included	0.919715	yes
MP1136	2017	2017-08-07	na	na	PH-0356A	Included	0.907605	yes
MP1137	2017	2017-05-01	na	na	MK-11003	Included	0.912504	yes
MP1138	2017	2017-05-12	2017-07-04	before	NT-0361	Not sequenced	NA	NA
MP1142	2017	2017-05-08	2016-03-14	after	PL-0327A	Included	0.917162	yes
MP1143	2017	2017-05-15	2017-07-04	before	NT-0361	Not sequenced	NA	NA
MP1144	2017	2017-05-16	na	na	KK-11032	Included	0.92306	yes
MP1145	2017	2017-05-03	na	na	KL-0268A	Included	0.911745	yes
MP1146	2017	2017-05-17	2016-08-31	after	PL-0366	Not sequenced	NA	NA
MP1147	2017	2017-08-08	na	na	KN-0217A	Not sequenced	NA	NA
MP1148	2017	2017-05-15	na	na	TM-0308	Not sequenced	NA	NA
MP1149	2017	2017-05-15	na	na	TM-0308	Included	0.915358	yes
MP1150	2017	2017-05-15	na	na	TM-0308	Included	0.908489	yes
MP1151	2017	2017-08-12	na	na	KL-0394	Not sequenced	NA	NA
MP1152	2017	2017-05-22	na	na	KN-0355A	Not sequenced	NA	NA
MP1153	2017	2017-05-01	na	na	PB-0275	Not sequenced	NA	NA
MP1154	2017	2017-05-08	na	na	KL-11013	Not sequenced	NA	NA
MP1155	2017	2017-05-22	na	na	TM-0308	Not sequenced	NA	NA
MP1156	2017	2017-05-19	na	na	MN-0377	Not sequenced	NA	NA
MP1157	2017	2017-05-16	na	na	MN-0377	Included	0.874735	no
MP1158	2017	2017-05-24	na	na	MP-0440	Not sequenced	NA	NA
MP1159	2017	2017-05-11	na	na	TK-183A	Not sequenced	NA	NA
MP1161	2017	2017-05-12	2015-08-09	after	PD-0372	Not sequenced	NA	NA
MP1162	2017	2017-05-15	na	na	KL-0268E	Included	0.926943	yes
MP1163	2017	2017-05-01	na	na	MN-0377	Not sequenced	NA	NA
MP1164	2017	2017-05-18	na	na	MN-0377	Not sequenced	NA	NA
MP1165	2017	2017-05-10	2017-07-11	before	WM-0367	Not sequenced	NA	NA
MP1166	2017	2017-05-05	na	na	MK-0426	Not sequenced	NA	NA
MP1168	2017	2017-08-14	na	na	KN-0217A	Not sequenced	NA	NA
MP1170	2017	2017-05-06	na	na	TK-183A	Included	0.921797	yes
MP1171	2017	2017-05-15	2017-06-30	before	MK-363C	Included	0.926341	yes
MP1172	2017	2017-05-01	2016-03-14	after	PL-0327A	Not sequenced	NA	NA
MP1173	2017	2017-05-05	na	na	LK-0319A	Not sequenced	NA	NA
MP1175	2017	2017-05-13	2016-03-14	after	PL-0327A	Included	0.934111	yes
MP1176	2017	2017-05-02	na	na	HL-0221A	Not sequenced	NA	NA
MP1178	2017	2017-05-05	na	na	TK-183A	Included	0.916109	yes
MP1179	2017	2017-05-04	na	na	LK-0319A	Not sequenced	NA	NA
MP1180	2017	2017-07-31	na	na	PL-11008A	Not sequenced	NA	NA
MP1181	2017	2017-05-09	na	na	KK-11032	Not sequenced	NA	NA
MP1182	2017	2017-05-09	na	na	TM-0308	Included	0.931892	yes
MP1183	2017	2017-05-26	na	na	CK-11052A	Not sequenced	NA	NA
MP1184	2017	2017-05-25	na	na	TM-0308	Included	0.914223	yes
MP1186	2017	2017-05-22	na	na	PK-0406A	Included	0.911263	yes
MP1187	2017	2017-05-06	2017-06-24	before	MM-0363A	Included	0.913604	yes
MP1188	2017	2017-05-01	na	na	LK-0331	Included	0.890038	no
MP1189	2017	2017-05-04	na	na	MT-11020A	Not sequenced	NA	NA
MP1190	2017	2017-05-23	na	na	MT-11020A	Not sequenced	NA	NA
MP1191	2017	2017-05-15	na	na	TM-0308	Included	0.934493	yes
MP1192	2017	2017-05-03	2016-03-14	after	PL-0327A	Included	0.918174	yes
MP1194	2017	2017-05-22	na	na	TM-298C	Not sequenced	NA	NA
MP1195	2017	2017-05-15	na	na	CK-11052A	Included	0.921554	yes
MP1196	2017	2017-05-27	na	na	TG-0294	Not sequenced	NA	NA
MP1197	2017	2017-05-13	na	na	BB-0316	Not sequenced	NA	NA
MP1198	2017	2017-05-08	na	na	BB-0316	Not sequenced	NA	NA
MP1199	2017	2017-05-15	na	na	TM-0308	Included	0.935588	yes
MP1200	2017	2017-05-09	na	na	LK-0331	Not sequenced	NA	NA
MP1201	2017	2017-05-03	2015-02-05	after	BW-0228	Not sequenced	NA	NA
MP1202	2017	2017-05-08	na	na	MM-11004	Not sequenced	NA	NA
MP1203	2017	2017-05-15	na	na	MM-0181	Not sequenced	NA	NA
MP1206	2017	2017-05-08	2016-03-14	after	PL-0327A	Not sequenced	NA	NA
MP1207	2017	2017-05-22	na	na	KL-11013	Not sequenced	NA	NA
MP1208	2017	2017-05-19	2016-03-14	after	PL-0327A	Not sequenced	NA	NA
MP1209	2017	2017-05-22	na	na	LK-0319A	Not sequenced	NA	NA
MP1210	2017	2017-05-10	na	na	MT-0342A	Included	0.892328	no
MP1211	2017	2017-05-10	na	na	CK-11052A	Not sequenced	NA	NA
MP1212	2017	2017-05-16	na	na	DK-11049A	Not sequenced	NA	NA
MP1215	2017	2017-05-15	na	na	HB-0320A	Not sequenced	NA	NA
MP1216	2017	2017-07-31	2016-03-13	after	PH-0336A	Included	0.823179	no
MP1217	2017	2017-08-04	2016-09-03	after	WT-0314A	Not sequenced	NA	NA
MP1218	2017	2017-05-08	na	na	MC-0393B	Not sequenced	NA	NA
MP1219	2017	2017-08-31	2020-05-02	before	LH-0266B	Included	0.901884	yes
MP1220	2017	2017-08-17	na	na	KP-0344A	Not sequenced	NA	NA
MP1221	2017	2017-05-08	na	na	PP-0338A	Not sequenced	NA	NA
MP1222	2017	2017-05-01	na	na	KL-11013	Not sequenced	NA	NA
MP1223	2017	2017-05-04	na	na	PB-0275	Not sequenced	NA	NA
MP1224	2017	2017-05-05	na	na	PB-0275	Not sequenced	NA	NA
MP1225	2017	2017-05-02	na	na	NL-0368	Not sequenced	NA	NA
MP1226	2017	2017-05-25	na	na	TM-0308	Not sequenced	NA	NA
MP1227	2017	2017-05-15	2017-07-11	before	WM-0367	Not sequenced	NA	NA
MP1229	2017	2017-05-08	2015-08-09	after	PD-0372	Not sequenced	NA	NA
MP1231	2017	2017-05-05	na	na	HB-0320A	Not sequenced	NA	NA
MP1232	2017	2017-05-08	na	na	CK-11052A	Not sequenced	NA	NA
MP1233	2017	2017-05-23	na	na	CK-11052A	Included	0.881037	no
MP1234	2017	2017-05-23	na	na	NB-11054A	Not sequenced	NA	NA
MP1235	2017	2017-05-22	na	na	CK-11052A	Not sequenced	NA	NA
MP1236	2017	2017-05-04	2016-03-14	after	HR-0318A	Not sequenced	NA	NA
MP1237	2017	2017-05-22	na	na	MN-0377	Not sequenced	NA	NA
MP1238	2017	2017-05-01	na	na	HB-0320A	Not sequenced	NA	NA
MP1239	2017	2017-05-14	na	na	CK-11052A	Included	0.897922	yes
MP1240	2017	2017-05-23	na	na	MN-0377	Not sequenced	NA	NA
MP1241	2017	2017-05-02	na	na	HB-0320A	Not sequenced	NA	NA
MP1242	2017	2017-05-03	na	na	LK-0319A	Not sequenced	NA	NA
MP1244	2017	2017-05-15	na	na	TM-0308	Included	0.932126	yes
MP1245	2017	2017-05-01	2017-07-11	before	WM-0367	Not sequenced	NA	NA
MP1246	2017	2017-05-03	na	na	CK-11052A	Not sequenced	NA	NA
MP1247	2017	2017-05-16	na	na	TM-0308	Not sequenced	NA	NA
MP1249	2017	2017-05-01	na	na	MC-0393B	Not sequenced	NA	NA
MP1251	2017	2017-05-15	2016-03-19	after	MH-0348A	Not sequenced	NA	NA
MP1253	2017	2017-05-09	na	na	HN-0337A	Not sequenced	NA	NA
MP1254	2017	2017-05-29	2016-03-18	after	DH-0315A	Not sequenced	NA	NA
MP1255	2017	2017-06-06	na	na	CK-11052A	Not sequenced	NA	NA
MP1256	2017	2017-06-13	2017-06-24	before	MM-0363A	Included	0.926401	yes
MP1257	2017	2017-06-24	na	na	LK-0319A	Included	0.926017	yes
MP1259	2017	2017-06-13	na	na	KK-0254A	Included	0.901989	yes
MP1260	2017	2017-06-19	na	na	KN-0355A	Not sequenced	NA	NA
MP1261	2017	2017-06-18	na	na	KN-0355A	Included	0.886013	no
MP1262	2017	2017-06-15	na	na	NK_11800A	Not sequenced	NA	NA
MP1263	2017	2017-06-12	na	na	MG-0261B	Included	0.938697	yes
MP1264	2017	2017-06-12	2016-03-18	after	KW-0301A	Not sequenced	NA	NA
MP1265	2017	2017-06-14	na	na	NB-11054A	Not sequenced	NA	NA
MP1266	2017	2017-06-12	na	na	PP-11050A	Included	0.927095	yes
MP1267	2017	2017-06-05	na	na	PP-0338A	Not sequenced	NA	NA
MP1268	2017	2017-06-07	na	na	PP-11050A	Included	0.932666	yes
MP1269	2017	2017-06-06	na	na	PP-0338A	Included	0.940048	yes
MP1270	2017	2017-06-13	na	na	KN-0355A	Not sequenced	NA	NA
MP1271	2017	2017-06-22	na	na	BB-0316	Included	0.95943	yes
MP1272	2017	2017-06-21	na	na	MN-0377	Not sequenced	NA	NA
MP1273	2017	2017-06-16	na	na	MK-11014	Included	0.925616	yes
MP1274	2017	2017-06-05	na	na	KL-0268A	Included	0.957993	yes
MP1275	2017	2017-06-16	2016-03-14	after	PL-0327A	Included	0.966886	yes
MP1277	2017	2017-05-31	2016-03-14	after	PL-0327A	Included	0.96773	yes
MP1278	2017	2017-06-13	2016-03-14	after	PL-0327A	Not sequenced	NA	NA
MP1279	2017	2017-06-12	na	na	BB-0316	Not sequenced	NA	NA
MP1280	2017	2017-07-10	na	na	MK-11003	Not sequenced	NA	NA
MP1283	2017	2017-06-19	2017-07-11	before	WM-0367	Not sequenced	NA	NA
MP1284	2017	2017-05-03	na	na	MK-11003	Not sequenced	NA	NA
MP1285	2017	2017-06-13	2016-03-14	after	PL-0327A	Not sequenced	NA	NA
MP1287	2017	2017-06-14	na	na	MK-11003	Included	0.955338	yes
MP1288	2017	2017-06-05	2016-03-14	after	PL-0327A	Not sequenced	NA	NA
MP1289	2017	2017-06-05	na	na	TO-11005	Not sequenced	NA	NA
MP1290	2017	2017-06-12	na	na	KL-0268A	Included	0.960612	yes
MP1291	2017	2017-06-07	2017-07-04	before	TM-0363F	Included	0.969399	yes
MP1293	2017	2017-06-16	2016-03-14	after	PL-0327A	Not sequenced	NA	NA
MP1294	2017	2017-06-05	2017-06-30	before	MK-363E	Included	0.550993	no
MP1295	2017	2017-06-05	2016-03-14	after	PL-0327A	Included	0.965235	yes
MP1296	2017	2017-06-01	na	na	HB-11007	Not sequenced	NA	NA
MP1297	2017	2017-06-05	na	na	TO-11005	Not sequenced	NA	NA
MP1298	2017	2017-06-20	na	na	KL-0394	Included	0.967747	yes
MP1299	2017	2017-06-05	2016-03-14	after	PL-0327A	Not sequenced	NA	NA
MP1300	2017	2017-06-12	2016-03-14	after	PL-0327A	Not sequenced	NA	NA
MP1301	2017	2017-06-16	na	na	PB-0275	Not sequenced	NA	NA
MP1302	2017	2017-06-12	2016-03-14	after	PL-0327A	Not sequenced	NA	NA
MP1304	2017	2017-06-13	na	na	HB-0320A	Included	0.967375	yes
MP1305	2017	2017-06-23	na	na	MN-268C	Included	0.965415	yes
MP1306	2017	2017-06-12	na	na	MM-0181	Not sequenced	NA	NA
MP1307	2017	2017-06-23	2015-02-10	after	HP-0203	Included	0.952974	yes
MP1308	2017	2017-05-27	na	na	HB-0272A	Not sequenced	NA	NA
MP1309	2017	2017-06-13	2016-03-14	after	PL-0327A	Not sequenced	NA	NA
MP1310	2017	2017-06-10	2016-03-14	after	PL-0327A	Not sequenced	NA	NA
MP1311	2017	2017-06-21	na	na	MH-0298A	Included	0.965289	yes
MP1312	2017	2017-06-12	2016-03-14	after	PL-0327A	Included	0.968918	yes
MP1313	2017	2017-06-17	2016-03-14	after	PL-0327A	Not sequenced	NA	NA
MP1314	2017	2017-06-06	na	na	HB-11007	Not sequenced	NA	NA
MP1315	2017	2017-06-06	2016-03-14	after	PL-0327A	Not sequenced	NA	NA
MP1316	2017	2017-05-30	na	na	HB-0320A	Not sequenced	NA	NA
MP1317	2017	2017-06-20	2016-04-13	after	TK-0376	Not sequenced	NA	NA
MP1318	2017	2017-06-06	na	na	HB-0269A	Not sequenced	NA	NA
MP1319	2017	2017-06-21	2016-09-03	after	WT-0314A	Included	0.964277	yes
MP1320	2017	2017-06-12	2015-08-09	after	PD-0372	Not sequenced	NA	NA
MP1321	2017	2017-06-08	na	na	HB-11007	Not sequenced	NA	NA
MP1322	2017	2017-06-17	2016-03-14	after	PL-0327A	Included	0.966273	yes
MP1323	2017	2017-06-03	na	na	HB-11007	Not sequenced	NA	NA
MP1324	2017	2017-06-02	na	na	MK-11003	Not sequenced	NA	NA
MP1325	2017	2017-06-03	na	na	HB-11007	Included	0.957828	yes
MP1327	2017	2017-06-05	na	na	MK-11003	Not sequenced	NA	NA
MP1328	2017	2017-05-30	2017-06-24	before	MM-0363A	Included	0.957233	yes
MP1329	2017	2017-06-15	2015-08-09	after	PD-0372	Included	0.927918	yes
MP1330	2017	2017-06-13	na	na	MG-0261B	Included	0.968805	yes
MP1332	2017	2017-06-14	na	na	KL-0394	Included	0.955627	yes
MP1333	2017	2017-06-06	na	na	MK-11047	Not sequenced	NA	NA
MP1335	2017	2017-06-22	na	na	MK-0447	Not sequenced	NA	NA
MP1337	2017	2017-06-17	2017-07-03	before	HG-0369	Not sequenced	NA	NA
MP1338	2017	2017-06-15	2016-04-13	after	TK-0376	Low coverage	NA	NA
MP1341	2017	2017-06-17	na	na	KN-0389	Not sequenced	NA	NA
MP1342	2017	2017-06-09	na	na	MW-0176	Not sequenced	NA	NA
MP1343	2017	2017-06-12	2016-09-03	after	WT-0314A	Not sequenced	NA	NA
MP1344	2017	2017-06-03	2017-07-12	before	HD-0363D	Low coverage	NA	NA
MP1345	2017	2017-06-02	2017-07-04	before	NT-0361	Included	0.958429	yes
MP1347	2017	2017-06-07	2016-03-14	after	PL-0327A	Included	0.967047	yes
MP1348	2017	2017-05-29	2016-03-14	after	PL-0327A	Not sequenced	NA	NA
MP1349	2017	2017-06-15	na	na	TG-0294	Not sequenced	NA	NA
MP1350	2017	2017-06-14	2015-08-09	after	PD-0372	Not sequenced	NA	NA
MP1352	2017	2017-06-25	2016-04-13	after	TK-0376	Included	0.960706	yes
MP1353	2017	2017-05-30	na	na	TK-0306	Not sequenced	NA	NA
MP1354	2017	2017-06-22	na	na	KL-0268A	Included	0.949735	yes
MP1355	2017	2017-06-02	2016-03-14	after	PL-0327A	Included	0.964566	yes
MP1356	2017	2017-05-30	2017-07-12	before	HD-0363D	Included	0.958186	yes
MP1357	2017	2017-05-30	na	na	MK-11003	Included	0.953575	yes
MP1358	2017	2017-06-13	na	na	HB-11007	Low coverage	NA	NA
MP1359	2017	2017-06-08	2016-03-14	after	PL-0327A	Included	0.956005	yes
MP1360	2017	2017-06-11	na	na	PB-0275	Included	0.960085	yes
MP1361	2017	2017-06-12	na	na	HB-0320A	Included	0.943731	yes
MP1362	2017	2017-06-14	na	na	MN-0377	Included	0.959123	yes
MP1363	2017	2017-06-20	na	na	BB-0316	Included	0.954373	yes
MP1365	2017	2017-06-21	na	na	KL-11013	Included	0.951571	yes
MP1366	2017	2017-06-08	na	na	KL-0268A	Included	0.958187	yes
MP1368	2017	2017-06-20	2017-07-03	before	HG-0369	Low coverage	NA	NA
MP1369	2017	2017-06-17	2016-04-13	after	TK-0376	Included	0.965068	yes
MP1370	2017	2017-06-14	2016-09-11	after	MW-0386A	Not sequenced	NA	NA
MP1371	2017	2017-06-08	2016-03-20	after	PN-0199A	Included	0.962731	yes
MP1372	2017	2017-05-29	na	na	MN-0377	Not sequenced	NA	NA
MP1373	2017	2017-05-29	na	na	MN-0377	Not sequenced	NA	NA
MP1374	2017	2017-06-21	2016-04-13	after	TK-0376	Not sequenced	NA	NA
MP1375	2017	2017-06-20	na	na	KL-0268A	Low coverage	NA	NA
MP1376	2017	2017-06-08	na	na	HB-0269A	Included	0.950111	yes
MP1377	2017	2017-07-26	2020-05-02	before	LH-0266B	Included	0.965959	yes
MP1378	2017	2017-06-20	na	na	DL-262A	Included	0.963278	yes
MP1379	2017	2017-06-16	na	na	KL-11013	Not sequenced	NA	NA
MP1380	2017	2017-06-14	2017-07-04	before	NT-0361	Not sequenced	NA	NA
MP1381	2017	2017-06-07	2017-07-11	before	WM-0367	Low coverage	NA	NA
MP1382	2017	2017-06-06	na	na	MM-0181	Included	0.963872	yes
MP1383	2017	2017-06-07	na	na	BB-0316	Not sequenced	NA	NA
MP1384	2017	2017-06-19	na	na	KT-0278	Included	0.956606	yes
MP1385	2017	2017-05-29	na	na	MK-11003	Included	0.955686	yes
MP1386	2017	2017-06-11	na	na	MP-0440	Included	0.9602	yes
MP1387	2017	2017-06-16	na	na	PB-0275	Not sequenced	NA	NA
MP1388	2017	2017-06-24	na	na	KN-0355A	Not sequenced	NA	NA
MP1389	2017	2017-06-05	na	na	KL-11013	Included	0.963529	yes
MP1390	2017	2017-06-17	na	na	PB-0275	Not sequenced	NA	NA
MP1391	2017	2017-06-06	2017-07-12	before	HD-0363D	Included	0.961326	yes
MP1392	2017	2017-06-08	2016-03-19	after	MH-0348A	Included	0.929577	yes
MP1393	2017	2017-05-29	2017-07-04	before	TP-0339	Not sequenced	NA	NA
MP1394	2017	2017-05-29	na	na	LK-0331	Not sequenced	NA	NA
MP1395	2017	2017-06-19	2016-03-14	after	PL-0327A	Included	0.961326	yes
MP1396	2017	2017-06-14	2017-07-11	before	WM-0367	Not sequenced	NA	NA
MP1397	2017	2017-06-05	2017-07-11	before	WM-0367	Not sequenced	NA	NA
MP1398	2017	2017-06-16	2016-03-14	after	PL-0327A	Not sequenced	NA	NA
MP1400	2017	2017-06-14	2017-07-04	before	TP-0339	Included	0.956241	yes
MP1401	2017	2017-06-19	2016-03-14	after	PL-0327A	Not sequenced	NA	NA
MP1402	2017	2017-06-06	na	na	MN-0377	Not sequenced	NA	NA
MP1403	2017	2017-06-05	2015-08-11	after	HW-0184	Included	0.965043	yes
MP1405	2017	2017-06-12	na	na	HB-11007	Not sequenced	NA	NA
MP1406	2017	2017-06-12	na	na	TK-0306	Not sequenced	NA	NA
MP1408	2017	2017-05-31	na	na	CK-11052A	Low coverage	NA	NA
MP1409	2017	2017-06-23	2016-03-18	after	KW-0301A	Included	0.966059	yes
MP1410	2017	2017-06-13	na	na	HB-0269A	Included	0.951133	yes
MP1412	2017	2017-06-12	na	na	SP-0362A	Not sequenced	NA	NA
MP1414	2017	2017-06-12	na	na	KL-11013	Included	0.962818	yes
MP1415	2017	2017-06-16	na	na	PB-0275	Not sequenced	NA	NA
MP1416	2017	2017-06-15	na	na	HS-0364	Included	0.958142	yes
MP1417	2017	2017-06-05	2016-03-18	after	DH-0315A	Included	0.960524	yes
MP1418	2017	2017-06-22	2016-09-02	after	MG-0261A	Not sequenced	NA	NA
MP1419	2017	2017-06-05	na	na	MN-0377	Not sequenced	NA	NA
MP1420	2017	2017-06-19	na	na	DP-0251	Not sequenced	NA	NA
MP1422	2017	2017-06-19	na	na	MK-11003	Low coverage	NA	NA
MP1424	2017	2017-05-30	2017-07-12	before	TG-0357	Included	0.958489	yes
MP1425	2017	2017-05-29	na	na	LK-0331	Not sequenced	NA	NA
MP1427	2017	2017-06-03	2017-07-04	before	TP-0339	Not sequenced	NA	NA
MP1428	2017	2017-06-14	2017-07-04	before	NT-0361	Not sequenced	NA	NA
MP1430	2017	2017-06-22	na	na	MK-11003	Included	0.955944	yes
MP1431	2017	2017-06-20	na	na	MH-0298A	Included	0.951393	yes
MP1432	2017	2017-06-14	na	na	TY-0329	Included	0.947472	yes
MP1433	2017	2017-05-29	na	na	PS-11064A	Not sequenced	NA	NA
MP1434	2017	2017-06-21	na	na	KL-0394	Included	0.958591	yes
MP1435	2017	2017-06-21	2016-03-14	after	PL-0327A	Not sequenced	NA	NA
MP1436	2017	2017-06-23	na	na	KL-0268A	Low coverage	NA	NA
MP1437	2017	2017-06-01	2016-04-13	after	TK-0376	Not sequenced	NA	NA
MP1438	2017	2017-06-22	2016-03-14	after	PL-0327A	Included	0.950921	yes
MP1439	2017	2017-06-14	2017-07-11	before	WM-0367	Low coverage	NA	NA
MP1440	2017	2017-06-20	2016-03-14	after	PL-0327A	Included	0.962371	yes
MP1441	2017	2017-06-23	2016-03-14	after	PL-0327A	Not sequenced	NA	NA
MP1442	2017	2017-05-20	2017-07-04	before	NT-0361	Low coverage	NA	NA
MP1443	2017	2017-06-06	2016-03-19	after	MH-0348A	Included	0.951672	yes
MP1444	2017	2017-06-02	2017-07-04	before	TP-0339	Included	0.9597	yes
MP1445	2017	2017-06-12	na	na	TM-0308	Included	0.958267	yes
MP1447	2017	2017-06-20	na	na	HB-0269A	Not sequenced	NA	NA
MP1448	2017	2017-06-19	2016-03-14	after	PL-0327A	Not sequenced	NA	NA
MP1449	2017	2017-06-08	2017-07-04	before	NT-0361	Not sequenced	NA	NA
MP1450	2017	2017-06-21	na	na	HB-0269A	Not sequenced	NA	NA
MP1451	2017	2017-06-09	na	na	MP-0440	Not sequenced	NA	NA
MP1452	2017	2017-06-16	2017-07-04	before	NT-0361	Included	0.927022	yes
MP1453	2017	2017-06-09	2017-07-04	before	NT-0361	Not sequenced	NA	NA
MP1454	2017	2017-06-15	2016-09-03	after	WT-0314A	Not sequenced	NA	NA
MP1455	2017	2017-06-20	na	na	KL-0268A	Included	0.475403	no
MP1456	2017	2017-05-30	na	na	CK-11052A	Included	0.928833	yes
MP1457	2017	2017-06-02	na	na	ML-0380A	Not sequenced	NA	NA
MP1458	2017	2017-05-30	2017-07-04	before	TP-0339	Not sequenced	NA	NA
MP1459	2017	2017-06-12	na	na	CK-11052A	Not sequenced	NA	NA
MP1460	2017	2017-06-19	na	na	ML-0380A	Not sequenced	NA	NA
MP1462	2017	2017-06-14	na	na	NK_11800A	Not sequenced	NA	NA
MP1463	2017	2017-05-31	na	na	MP-0440	Not sequenced	NA	NA
MP1465	2017	2017-06-01	na	na	LK-0331	Not sequenced	NA	NA
MP1466	2017	2017-06-07	na	na	KN-0355A	Not sequenced	NA	NA
MP1467	2017	2017-06-12	na	na	LK-0331	Not sequenced	NA	NA
MP1468	2017	2017-06-14	na	na	KN-0355A	Not sequenced	NA	NA
MP1469	2017	2017-06-13	na	na	KN-0355A	Not sequenced	NA	NA
MP1470	2017	2017-06-01	2016-03-18	after	DH-0315A	Not sequenced	NA	NA
MP1471	2017	2017-06-14	2017-07-04	before	NT-0361	Not sequenced	NA	NA
MP1472	2017	2017-06-12	2017-07-04	before	TP-0339	Not sequenced	NA	NA
MP1474	2017	2017-06-07	na	na	NB-11054A	Included	0.910962	yes
MP1475	2017	2017-06-12	2016-09-02	after	MC-0396A	Not sequenced	NA	NA
MP1476	2017	2017-05-29	na	na	MC-0393B	Not sequenced	NA	NA
MP1477	2017	2017-06-10	na	na	ML-0458A	Not sequenced	NA	NA
MP1478	2017	2017-06-20	2020-05-02	before	HH-0431	Not sequenced	NA	NA
MP1479	2017	2017-06-06	na	na	MK-0265	Not sequenced	NA	NA
MP1480	2017	2017-06-12	na	na	MK-0265	Included	0.910043	yes
MP1481	2017	2017-05-31	2017-07-04	before	TP-0339	Not sequenced	NA	NA
MP1483	2017	2017-06-04	2017-06-30	before	MK-363C	Not sequenced	NA	NA
MP1485	2017	2017-06-18	2017-07-04	before	TP-0339	Not sequenced	NA	NA
MP1486	2017	2017-05-30	na	na	PS-11064A	Not sequenced	NA	NA
MP1488	2017	2017-06-14	2017-07-04	before	NT-0361	Not sequenced	NA	NA
MP1489	2017	2017-06-22	2016-03-19	after	MH-0348A	Not sequenced	NA	NA
MP1491	2017	2017-05-29	2016-09-03	after	WT-0314A	Not sequenced	NA	NA
MP1492	2017	2017-06-19	na	na	KN-0355A	Not sequenced	NA	NA
MP1493	2017	2017-06-23	2016-03-18	after	KW-0301A	Not sequenced	NA	NA
MP1494	2017	2017-06-08	2016-03-18	after	DH-0315A	Not sequenced	NA	NA
MP1497	2017	2017-06-19	2016-09-03	after	WT-0314A	Not sequenced	NA	NA
MP1498	2017	2017-06-01	2016-09-03	after	WT-0314A	Not sequenced	NA	NA
MP1500	2017	2017-05-30	2016-09-03	after	WT-0314A	Not sequenced	NA	NA
MP1501	2017	2017-06-16	na	na	SP-0360A	Not sequenced	NA	NA
MP1502	2017	2017-06-15	na	na	MK-11047	Not sequenced	NA	NA
MP1503	2017	2017-06-23	na	na	KN-0355A	Not sequenced	NA	NA
MP1505	2017	2017-06-23	2016-03-19	after	MH-0348A	Not sequenced	NA	NA
MP1507	2017	2017-06-05	2016-03-18	after	DH-0315A	Not sequenced	NA	NA
MP1509	2017	2017-06-14	2017-06-24	before	MM-0363A	Included	0.930329	yes
MP1511	2017	2017-06-03	2016-03-14	after	HR-0318A	Not sequenced	NA	NA
MP1512	2017	2017-05-30	2016-03-18	after	DH-0315A	Not sequenced	NA	NA
MP1514	2017	2017-06-01	2016-03-18	after	DH-0315A	Not sequenced	NA	NA
MP1515	2017	2017-05-30	2016-03-18	after	DH-0315A	Not sequenced	NA	NA
MP1516	2017	2017-06-23	2016-03-19	after	MH-0348A	Not sequenced	NA	NA
MP1517	2017	2017-06-05	2017-07-04	before	TP-0339	Not sequenced	NA	NA
MP1518	2017	2017-06-12	na	na	MK-0265	Not sequenced	NA	NA
MP1519	2017	2017-06-06	na	na	NB-11054A	Not sequenced	NA	NA
MP1520	2017	2017-05-29	2020-05-02	before	LH-0266B	Included	0.888686	no
MP1521	2017	2017-05-21	na	na	MK-0265	Included	0.933979	yes
MP1522	2017	2017-06-17	2017-07-04	before	TP-0339	Not sequenced	NA	NA
MP1523	2017	2017-06-05	na	na	TM-0308	Not sequenced	NA	NA
MP1524	2017	2017-05-22	2016-09-03	after	WT-0314A	Included	0.945937	yes
MP1525	2017	2017-06-19	2017-07-03	before	HG-0369	Included	0.907	yes
MP1526	2017	2017-06-01	2016-03-14	after	HR-0318A	Not sequenced	NA	NA
MP1527	2017	2017-06-22	2016-09-03	after	WT-0314A	Not sequenced	NA	NA
MP1529	2017	2017-06-01	na	na	MP-0440	Not sequenced	NA	NA
MP1530	2017	2017-06-02	na	na	HB-0320A	Not sequenced	NA	NA
MP1532	2017	2017-06-07	2017-06-24	before	MM-0363A	Included	0.920678	yes
MP1533	2017	2017-06-12	2016-03-14	after	PL-0327A	Included	0.920318	yes
MP1536	2017	2017-06-09	na	na	KH-0213A	Not sequenced	NA	NA
MP1537	2017	2017-06-20	na	na	HT-0378A	Not sequenced	NA	NA
MP1538	2017	2017-06-14	na	na	MK-11014	Not sequenced	NA	NA
MP1539	2017	2017-06-01	2017-07-04	before	TP-0339	Not sequenced	NA	NA
MP1540	2017	2017-06-18	na	na	HT-0378A	Not sequenced	NA	NA
MP1541	2017	2017-06-20	na	na	KP-0418	Not sequenced	NA	NA
MP1542	2017	2017-06-09	na	na	KH-0213A	Not sequenced	NA	NA
MP1543	2017	2017-06-05	na	na	NB-11054A	Included	0.900289	yes
MP1544	2017	2017-05-30	2017-07-04	before	TM-0363F	Included	0.772596	no
MP1545	2017	2017-06-05	na	na	TK-183A	Included	0.967405	yes
MP1547	2017	2017-06-06	na	na	LP-0375	Not sequenced	NA	NA
MP1548	2017	2017-06-18	na	na	HN-0337A	Included	0.956792	yes
MP1549	2017	2017-06-06	na	na	HP-11009	Included	0.961634	yes
MP1550	2017	2017-06-07	na	na	NB-11054A	Included	0.954341	yes
MP1551	2017	2017-06-06	na	na	KP-0344A	Included	0.95608	yes
MP1552	2017	2017-06-01	2016-09-03	after	WT-0314A	Included	0.9553	yes
MP1553	2017	2017-06-14	na	na	CK-11052A	Low coverage	NA	NA
MP1554	2017	2017-06-05	2017-06-30	before	MK-363C	Included	0.955468	yes
MP1555	2017	2017-06-05	na	na	DB-0239A	Included	0.955754	yes
MP1556	2017	2017-05-29	na	na	PS-11064A	Included	0.95546	yes
MP1557	2017	2017-04-27	na	na	NB-11054A	Included	0.952587	yes
MP1558	2017	2017-05-22	2017-07-04	before	TP-0339	Included	0.946751	yes
MP1559	2017	2017-05-25	2017-07-04	before	TP-0339	Included	0.955109	yes
MP1560	2017	2017-05-18	2016-03-14	after	HR-0318A	Not sequenced	NA	NA
MP1561	2017	2017-05-08	na	na	MH-0298A	Included	0.962098	yes
MP1562	2016	2016-06-19	2016-03-14	after	HR-0318A	Not sequenced	NA	NA
MP1563	2017	2017-05-15	2016-03-14	after	HR-0318A	Not sequenced	NA	NA
MP1564	2017	2017-05-20	2017-07-04	before	TP-0339	Included	0.949647	yes
MP1565	2017	2017-05-16	2017-07-04	before	TP-0339	Not sequenced	NA	NA
MP1566	2017	2017-05-05	2017-07-04	before	TP-0339	Included	0.958999	yes
MP1567	2017	2017-05-10	2017-07-04	before	TP-0339	Included	0.958322	yes
MP1568	2017	2017-05-01	2017-07-04	before	TP-0339	Included	0.80267	no
MP1569	2017	2017-06-09	na	na	MH-0298A	Included	0.605658	no
MP1570	2017	2017-05-25	na	na	PN-0196	Not sequenced	NA	NA
MP1571	2017	2017-05-24	2017-07-04	before	TP-0339	Not sequenced	NA	NA
MP1572	2017	2017-05-21	2017-07-04	before	TP-0339	Included	0.954784	yes
MP1573	2017	2017-05-23	2017-07-04	before	TP-0339	Not sequenced	NA	NA
MP1574	2017	2017-05-03	2017-07-04	before	TP-0339	Included	0.964883	yes
MP1575	2017	2017-05-17	2017-07-04	before	TP-0339	Included	0.956061	yes
MP1576	2017	2017-05-10	na	na	TM-298C	Included	0.960382	yes
MP1577	2017	2017-05-02	2017-07-04	before	LK-0350	Not sequenced	NA	NA
MP1578	2017	2017-05-01	2017-07-04	before	LK-0350	Not sequenced	NA	NA
MP1579	2017	2017-05-25	na	na	KK-0246	Not sequenced	NA	NA
MP1580	2017	2017-05-23	2017-07-04	before	LK-0350	Not sequenced	NA	NA
MP1581	2017	2017-07-05	2017-07-11	before	WM-0367	Not sequenced	NA	NA
MP1582	2017	2017-06-29	2016-03-14	after	PL-0327A	Included	0.94106	yes
MP1583	2017	2017-07-11	na	na	MM-11004	Included	0.918255	yes
MP1584	2017	2017-06-21	2017-06-24	before	MM-0363A	Included	0.945639	yes
MP1586	2017	2017-06-19	2017-06-24	before	MM-0363A	Included	0.948039	yes
MP1590	2017	2017-06-24	na	na	MM-11004	Not sequenced	NA	NA
MP1591	2017	2017-06-27	na	na	PK-0449	Not sequenced	NA	NA
MP1594	2017	2017-07-06	na	na	PT-0445	Included	0.950707	yes
MP1597	2017	2017-07-10	na	na	MK-0447	Not sequenced	NA	NA
MP1598	2017	2017-06-26	na	na	TO-11005	Not sequenced	NA	NA
MP1599	2017	2017-06-26	na	na	BB-0316	Not sequenced	NA	NA
MP1601	2017	2017-06-27	2017-07-11	before	WM-0367	Not sequenced	NA	NA
MP1602	2017	2017-07-19	na	na	KN-0217A	Included	0.94539	yes
MP1603	2017	2017-06-26	2017-07-11	before	WM-0367	Not sequenced	NA	NA
MP1604	2017	2017-07-10	2017-07-04	after	TP-0339	Included	0.958828	yes
MP1605	2017	2017-06-22	2017-07-04	before	TP-0339	Not sequenced	NA	NA
MP1606	2017	2017-07-03	na	na	BB-0316	Not sequenced	NA	NA
MP1607	2017	2017-07-29	na	na	MP-0440	Not sequenced	NA	NA
MP1608	2017	2017-07-03	na	na	BB-0316	Included	0.956215	yes
MP1609	2017	2017-06-28	na	na	BB-0316	Not sequenced	NA	NA
MP1610	2017	2017-07-17	na	na	KT-0433	Not sequenced	NA	NA
MP1611	2017	2017-07-12	2015-08-14	after	PT-0282	Included	0.951064	yes
MP1612	2017	2017-06-28	2020-05-02	before	HH-0431	Included	0.943672	yes
MP1613	2017	2017-07-12	na	na	MN-268C	Low coverage	NA	NA
MP1614	2017	2017-07-12	na	na	MN-268C	Included	0.944078	yes
MP1615	2017	2017-07-26	na	na	MK-11003	Low coverage	NA	NA
MP1616	2017	2017-07-10	na	na	BB-0316	Included	0.952093	yes
MP1618	2017	2017-07-17	2017-07-12	after	TG-0357	Not sequenced	NA	NA
MP1619	2017	2017-06-26	2016-03-14	after	PL-0327A	Included	0.965249	yes
MP1620	2017	2017-06-19	2017-07-04	before	TP-0339	Included	0.875477	no
MP1621	2017	2017-07-27	2017-06-30	after	MK-363C	Included	0.964363	yes
MP1622	2017	2017-07-11	na	na	LF-0284	Included	0.956497	yes
MP1623	2017	2017-06-29	na	na	LK-0331	Included	0.968294	yes
MP1624	2017	2017-06-30	na	na	HS-0364	Included	0.952213	yes
MP1625	2017	2017-06-29	na	na	HB-11007	Not sequenced	NA	NA
MP1627	2017	2017-06-25	na	na	TK-183A	Not sequenced	NA	NA
MP1628	2017	2017-06-26	na	na	KL-0268A	Included	0.966847	yes
MP1629	2017	2017-07-19	na	na	MN-268C	Included	0.959343	yes
MP1630	2017	2017-07-13	2017-06-24	after	MM-0363A	Included	0.957244	yes
MP1631	2017	2017-06-26	2015-08-09	after	PD-0372	Not sequenced	NA	NA
MP1632	2017	2017-06-28	2015-08-09	after	PD-0372	Not sequenced	NA	NA
MP1635	2017	2017-07-03	2017-07-04	before	NT-0361	Not sequenced	NA	NA
MP1636	2017	2017-06-20	2017-06-24	before	MM-0363A	Low coverage	NA	NA
MP1638	2017	2017-07-12	2017-07-12	before	HD-0363D	Included	0.947314	yes
MP1640	2017	2017-07-18	2015-08-09	after	PD-0372	Included	0.955046	yes
MP1641	2017	2017-07-08	2017-07-11	before	WM-0367	Included	0.96766	yes
MP1642	2017	2017-06-26	na	na	MN-268C	Included	0.965101	yes
MP1643	2017	2017-06-20	na	na	MM-11004	Included	0.943168	yes
MP1644	2017	2017-06-29	2016-03-14	after	PL-0327A	Included	0.939898	yes
MP1645	2017	2017-06-30	2016-03-14	after	PL-0327A	Not sequenced	NA	NA
MP1646	2017	2017-06-26	na	na	MN-268C	Low coverage	NA	NA
MP1647	2017	2017-09-17	na	na	DB-0145A	Included	0.915241	yes
MP1648	2017	2017-07-10	na	na	KN-0355A	Not sequenced	NA	NA
MP1649	2017	2017-07-29	na	na	HB-11007	Included	0.917726	yes
MP1650	2017	2017-06-19	na	na	LK-0331	Not sequenced	NA	NA
MP1651	2017	2017-07-30	na	na	DB-0145B	Included	0.950959	yes
MP1652	2017	2017-07-20	na	na	DB-0145B	Included	0.934953	yes
MP1653	2017	2017-06-27	na	na	MK-11003	Included	0.923861	yes
MP1654	2017	2017-07-12	na	na	TK-0247	Not sequenced	NA	NA
MP1655	2017	2017-07-12	na	na	TK-0247	Not sequenced	NA	NA
MP1656	2017	2017-06-24	na	na	MM-11004	Not sequenced	NA	NA
MP1657	2017	2017-06-29	na	na	LK-0319A	Included	0.926076	yes
MP1658	2017	2017-07-24	2016-09-12	after	KN-0388A	Included	0.890914	no
MP1659	2017	2017-07-11	na	na	HB-0434	Not sequenced	NA	NA
MP1660	2017	2017-07-18	2016-03-18	after	DH-0315A	Included	0.867096	no
MP1661	2017	2017-07-01	na	na	MK-0447	Not sequenced	NA	NA
MP1662	2017	2017-06-26	na	na	KL-0394	Included	0.911799	yes
MP1663	2017	2017-07-04	na	na	KL-0268A	Included	0.900964	yes
MP1664	2017	2017-06-29	2017-07-11	before	WM-0367	Not sequenced	NA	NA
MP1665	2017	2017-07-13	na	na	HB-0340A	Not sequenced	NA	NA
MP1666	2017	2017-07-14	na	na	PH-0356A	Included	0.917237	yes
MP1667	2017	2017-06-26	na	na	KP-0344A	Not sequenced	NA	NA
MP1668	2017	2017-07-14	na	na	HT-0378A	Included	0.932627	yes
MP1669	2017	2017-07-03	na	na	PH-0356B	Included	0.924128	yes
MP1670	2017	2017-07-12	na	na	HB-0340A	Low coverage	NA	NA
MP1671	2017	2017-07-25	na	na	PT-0395	Included	0.909263	yes
MP1672	2017	2017-07-24	na	na	PT-0395	Included	0.917088	yes
MP1673	2017	2017-06-30	2016-03-14	after	PL-0327A	Not sequenced	NA	NA
MP1675	2017	2017-06-15	na	na	TG-250A	Included	0.892999	no
MP1676	2017	2017-07-23	na	na	KH-0213A	Not sequenced	NA	NA
MP1677	2017	2017-07-26	na	na	MK-0447	Not sequenced	NA	NA
MP1678	2017	2017-06-19	na	na	KO-0204A	Low coverage	NA	NA
MP1679	2017	2017-07-17	2015-09-12	after	HT-0323	Not sequenced	NA	NA
MP1681	2017	2017-07-05	na	na	KL-0268A	Low coverage	NA	NA
MP1684	2017	2017-07-03	2016-03-14	after	PL-0327A	Not sequenced	NA	NA
MP1685	2017	2017-07-04	2016-03-14	after	PL-0327A	Not sequenced	NA	NA
MP1686	2017	2017-07-10	2016-03-14	after	PL-0327A	Low coverage	NA	NA
MP1687	2017	2017-07-06	na	na	HB-11007	Included	0.939044	yes
MP1688	2017	2017-06-26	na	na	KH-11068	Not sequenced	NA	NA
MP1689	2017	2017-06-26	na	na	MK-0238	Included	0.916915	yes
MP1690	2017	2017-06-27	na	na	MN-268C	Included	0.929327	yes
MP1691	2017	2017-07-14	na	na	KN-0355A	Not sequenced	NA	NA
MP1692	2017	2017-07-03	na	na	CK-11052A	Included	0.920954	yes
MP1693	2017	2017-06-27	na	na	KP-0344A	Not sequenced	NA	NA
MP1694	2017	2017-07-23	2015-09-07	after	BP-0321A	Low coverage	NA	NA
MP1695	2017	2017-07-06	na	na	NB-11051A	Not sequenced	NA	NA
MP1696	2017	2017-07-17	na	na	MK-11003	Not sequenced	NA	NA
MP1697	2017	2017-07-06	2016-09-02	after	MG-0261A	Not sequenced	NA	NA
MP1698	2017	2017-07-28	na	na	PD-11057A	Not sequenced	NA	NA
MP1699	2017	2017-07-06	2016-03-18	after	DH-0315A	Not sequenced	NA	NA
MP1700	2017	2017-06-26	2016-03-19	after	MH-0348A	Not sequenced	NA	NA
MP1701	2017	2017-07-28	na	na	HB-0320A	Not sequenced	NA	NA
MP1702	2017	2017-07-04	na	na	KD-11058	Not sequenced	NA	NA
MP1703	2017	2017-07-06	2016-08-31	after	PL-0366	Included	0.900609	yes
MP1704	2017	2017-06-26	na	na	KL-11013	Low coverage	NA	NA
MP1705	2017	2017-06-22	na	na	LK-0331	Included	0.928033	yes
MP1706	2017	2017-06-26	na	na	KL-0394	Low coverage	NA	NA
MP1707	2017	2017-07-07	na	na	PT-0395	Not sequenced	NA	NA
MP1708	2017	2017-06-29	na	na	PH-0356B	Included	0.94604	yes
MP1709	2017	2017-07-28	2016-04-13	after	TK-0376	Included	0.823906	no
MP1710	2017	2017-07-26	na	na	KP-0344A	Not sequenced	NA	NA
MP1711	2017	2017-07-10	na	na	TR-0414	Not sequenced	NA	NA
MP1712	2017	2017-07-24	na	na	PH-0356B	Included	0.934566	yes
MP1714	2017	2017-07-19	na	na	KP-11046A	Not sequenced	NA	NA
MP1715	2017	2017-06-27	na	na	MK-0265	Included	0.916996	yes
MP1716	2017	2017-07-11	na	na	KN-0355A	Not sequenced	NA	NA
MP1717	2017	2017-06-29	2016-03-19	after	MH-0348A	Included	0.891926	no
MP1718	2017	2017-06-28	2016-03-19	after	MH-0348A	Not sequenced	NA	NA
MP1719	2017	2017-07-25	2016-03-19	after	MH-0348A	Not sequenced	NA	NA
MP1720	2017	2017-07-10	2015-08-09	after	PD-0372	Included	0.94083	yes
MP1721	2017	2017-06-26	na	na	HT-0378A	Not sequenced	NA	NA
MP1722	2017	2017-07-12	2017-07-11	after	WM-0367	Not sequenced	NA	NA
MP1723	2017	2017-07-10	na	na	HS-0364	Included	0.945868	yes
MP1724	2017	2017-07-11	na	na	HS-0364	Included	0.920691	yes
MP1725	2017	2017-07-17	na	na	HS-0364	Not sequenced	NA	NA
MP1726	2017	2017-07-17	na	na	HS-0364	Included	0.920183	yes
MP1727	2017	2017-07-17	na	na	HT-0378A	Included	0.901929	yes
MP1728	2017	2017-06-28	na	na	HT-0378A	Not sequenced	NA	NA
MP1729	2017	2017-07-15	2015-08-09	after	PD-0372	Included	0.922284	yes
MP1730	2017	2017-07-03	2017-07-11	before	WM-0367	Not sequenced	NA	NA
MP1731	2017	2017-07-23	na	na	HT-0378A	Not sequenced	NA	NA
MP1732	2017	2017-07-28	na	na	ML-0380A	Not sequenced	NA	NA
MP1733	2017	2017-07-21	na	na	PS-11064A	Not sequenced	NA	NA
MP1734	2017	2017-07-20	na	na	PS-11064A	Not sequenced	NA	NA
MP1735	2017	2017-07-17	na	na	PP-0338A	Included	0.935074	yes
MP1736	2017	2017-07-08	na	na	KN-0355A	Included	0.899524	yes
MP1737	2017	2017-07-07	na	na	MC-0393B	Included	0.908945	yes
MP1738	2017	2017-07-08	2017-07-11	before	WM-0367	Included	0.613893	no
MP1739	2017	2017-06-29	2016-04-13	after	TK-0376	Not sequenced	NA	NA
MP1740	2017	2017-07-03	na	na	NK-0425A	Included	0.942666	yes
MP1741	2017	2017-07-04	na	na	KP-0344A	Not sequenced	NA	NA
MP1742	2017	2017-07-27	2016-09-11	after	MW-0386A	Not sequenced	NA	NA
MP1743	2017	2017-07-20	na	na	KP-0421A	Not sequenced	NA	NA
MP1744	2017	2017-07-08	2017-07-11	before	WM-0367	Not sequenced	NA	NA
MP1747	2017	2017-06-26	na	na	DP-0227A	Not sequenced	NA	NA
MP1748	2017	2017-07-24	na	na	KK-0246	Not sequenced	NA	NA
MP1749	2017	2017-07-26	2016-03-14	after	PL-0327A	Not sequenced	NA	NA
MP1750	2017	2017-07-28	2016-03-14	after	PL-0327A	Not sequenced	NA	NA
MP1751	2017	2017-07-27	na	na	HB-11007	Not sequenced	NA	NA
MP1753	2017	2017-07-18	na	na	LK-0331	Not sequenced	NA	NA
MP1754	2017	2017-07-04	na	na	MK-0447	Not sequenced	NA	NA
MP1755	2017	2017-07-05	2017-07-11	before	WM-0367	Not sequenced	NA	NA
MP1757	2017	2017-07-21	na	na	KP-0344A	Low coverage	NA	NA
MP1758	2017	2017-07-03	na	na	KP-0344A	Not sequenced	NA	NA
MP1759	2017	2017-06-18	na	na	TG-250A	Not sequenced	NA	NA
MP1760	2017	2017-06-25	na	na	PH-0356A	Not sequenced	NA	NA
MP1761	2017	2017-07-24	2016-09-03	after	WT-0314A	Not sequenced	NA	NA
MP1762	2017	2017-10-02	na	na	TK-0566	Not sequenced	NA	NA
MP1763	2017	2017-09-26	2015-08-10	after	TB-0805	Not sequenced	NA	NA
MP1764	2017	2017-09-19	2015-08-10	after	TB-0805	Not sequenced	NA	NA
MP1765	2017	2017-08-21	na	na	KP-0344B	Not sequenced	NA	NA
MP1766	2017	2017-09-18	na	na	HM-0833	Not sequenced	NA	NA
MP1767	2017	2017-09-12	na	na	KL-0268E	Not sequenced	NA	NA
MP1768	2017	2017-09-13	na	na	OT-0268D	Not sequenced	NA	NA
MP1770	2017	2017-09-05	2017-06-24	after	MM-0363A	Not sequenced	NA	NA
MP1771	2017	2017-08-28	na	na	TM-0798	Not sequenced	NA	NA
MP1772	2017	2017-09-11	na	na	PH-0356B	Not sequenced	NA	NA
MP1773	2017	2017-09-07	2017-07-11	after	WM-0367	Not sequenced	NA	NA
MP1774	2017	2017-09-15	na	na	HT-0378A	Not sequenced	NA	NA
MP1775	2017	2017-09-09	na	na	KN-0217A	Included	0.949595	yes
MP1776	2017	2017-09-11	2020-05-02	before	LH-0266B	Not sequenced	NA	NA
MP1777	2017	2017-08-28	na	na	HB-0272A	Not sequenced	NA	NA
MP1778	2017	2017-09-11	na	na	TK-0459	Not sequenced	NA	NA
MP1779	2017	2017-08-21	na	na	KD-0249A	Not sequenced	NA	NA
MP1781	2017	2017-09-12	na	na	PP-11050A	Not sequenced	NA	NA
MP1782	2017	2017-09-16	na	na	HL-0221A	Not sequenced	NA	NA
MP1784	2017	2017-09-13	na	na	KL-0268E	Not sequenced	NA	NA
MP1786	2017	2017-09-07	2017-07-11	after	WM-0367	Not sequenced	NA	NA
MP1787	2017	2017-09-09	na	na	HB-11007	Included	0.93518	yes
MP1788	2017	2017-09-16	2017-07-11	after	WM-0367	Not sequenced	NA	NA
MP1789	2017	2017-09-11	na	na	NB-11054A	Not sequenced	NA	NA
MP1790	2017	2017-09-08	na	na	HS-0364	Not sequenced	NA	NA
MP1791	2017	2017-09-07	na	na	HS-0364	Not sequenced	NA	NA
MP1792	2017	2017-08-29	na	na	NK_11800A	Not sequenced	NA	NA
MP1793	2017	2017-09-05	na	na	LK-0331	Not sequenced	NA	NA
MP1794	2017	2017-08-22	2016-03-14	after	PL-0327A	Included	0.945851	yes
MP1796	2017	2017-09-07	na	na	KT-0433	Not sequenced	NA	NA
MP1797	2017	2017-08-31	na	na	HS-0364	Not sequenced	NA	NA
MP1798	2017	2017-08-31	na	na	TY-0329	Not sequenced	NA	NA
MP1799	2017	2017-09-19	2017-07-11	after	WM-0367	Included	0.915998	yes
MP1800	2017	2017-09-13	na	na	PH-0356A	Not sequenced	NA	NA
MP1801	2017	2017-09-05	na	na	TM-298C	Not sequenced	NA	NA
MP1803	2017	2017-09-05	na	na	MN-268C	Not sequenced	NA	NA
MP1804	2017	2017-09-12	2017-06-24	after	MM-0363A	Not sequenced	NA	NA
MP1805	2017	2017-09-04	na	na	LK-0331	Included	0.913955	yes
MP1806	2017	2017-09-18	na	na	OT-0268D	Not sequenced	NA	NA
MP1807	2017	2017-09-05	na	na	HB-0320A	Included	0.921462	yes
MP1808	2017	2017-09-04	2015-09-12	after	HT-0323	Included	0.93587	yes
MP1809	2017	2017-09-18	na	na	HB-0434	Included	0.940546	yes
MP1810	2017	2017-08-30	2015-09-12	after	HT-0323	Not sequenced	NA	NA
MP1812	2017	2017-09-04	na	na	KT-0433	Not sequenced	NA	NA
MP1813	2017	2017-09-12	na	na	PH-0356A	Not sequenced	NA	NA
MP1814	2017	2017-08-29	2017-07-11	after	WM-0367	Not sequenced	NA	NA
MP1815	2017	2017-09-04	na	na	LK-0331	Not sequenced	NA	NA
MP1816	2017	2017-08-23	na	na	WK-0343	Not sequenced	NA	NA
MP1817	2017	2017-09-04	2016-03-14	after	MK-0288A	Not sequenced	NA	NA
MP1818	2017	2017-09-06	na	na	TM-298C	Not sequenced	NA	NA
MP1819	2017	2017-09-06	na	na	MK-11047	Not sequenced	NA	NA
MP1820	2017	2017-09-16	2017-07-11	after	WM-0367	Not sequenced	NA	NA
MP1821	2017	2017-09-16	na	na	KL-0268B	Not sequenced	NA	NA
MP1822	2017	2017-09-06	na	na	KK-0246	Not sequenced	NA	NA
MP1823	2017	2017-04-25	na	na	NC-0882	Included	0.948032	yes
MP1824	2017	2017-04-17	na	na	KP-0818	Not sequenced	NA	NA
MP1825	2017	2017-04-22	na	na	HW-13077	Not sequenced	NA	NA
MP1826	2017	2017-10-19	na	na	LK-0331	Not sequenced	NA	NA
MP1827	2017	2017-10-16	na	na	LW-0310A	Included	0.948591	yes
MP1828	2017	2017-10-03	na	na	MG-0261B	Included	0.953586	yes
MP1829	2017	2017-09-27	na	na	KN-0293A	Not sequenced	NA	NA
MP1830	2017	2017-10-16	na	na	NB-11054A	Included	0.938823	yes
MP1831	2017	2017-09-22	na	na	MK-11047	Included	0.951554	yes
MP1832	2017	2017-10-20	na	na	DL-262B	Included	0.932487	yes
MP1833	2017	2017-10-22	na	na	KH-0213A	Included	0.913669	yes
MP1834	2017	2017-10-09	na	na	NB-11054A	Included	0.924195	yes
MP1835	2017	2017-10-17	na	na	DL-262B	Not sequenced	NA	NA
MP1836	2017	2017-10-17	na	na	NB-11051A	Included	0.909691	yes
MP1837	2017	2017-10-13	na	na	KP-0344B	Included	0.702262	no
MP1838	2017	2017-11-21	na	na	PT-0445	Not sequenced	NA	NA
MP1839	2017	2017-09-29	na	na	NN-0291A	Included	0.939483	yes
MP1840	2017	2017-09-29	na	na	MK-11047	Included	0.933405	yes
MP1841	2017	2017-10-14	na	na	MK-0447	Not sequenced	NA	NA
MP1842	2017	2017-10-22	na	na	NB-11051A	Included	0.933955	yes
MP1843	2017	2017-09-26	na	na	PW-0244A	Included	0.923886	yes
MP1844	2017	2017-09-23	na	na	HT-0378A	Included	0.938023	yes
MP1845	2017	2017-10-06	na	na	HS-0364	Not sequenced	NA	NA
MP1846	2017	2017-10-17	na	na	PP-11050A	Low coverage	NA	NA
MP1847	2017	2017-10-05	na	na	PH-0356A	Included	0.928231	yes
MP1848	2017	2017-10-07	na	na	HS-0364	Included	0.925433	yes
MP1849	2017	2017-10-04	na	na	HS-0364	Included	0.936	yes
MP1850	2017	2017-10-04	na	na	HS-0364	Included	0.920617	yes
MP1851	2017	2017-10-22	na	na	KN-0217A	Included	0.926923	yes
MP1852	2017	2017-09-26	na	na	BT-0353A	Included	0.598256	no
MP1853	2017	2017-09-25	na	na	TM-298C	Included	0.897503	yes
MP1854	2017	2017-10-21	na	na	LK-0331	Not sequenced	NA	NA
MP1855	2017	2017-09-28	na	na	DP-0227A	Included	0.939762	yes
MP1856	2017	2017-09-26	na	na	TG-250A	Included	0.927631	yes
MP1857	2017	2017-10-20	na	na	ML-0458A	Not sequenced	NA	NA
MP1858	2017	2017-10-16	na	na	KN-0217A	Included	0.918142	yes
MP1859	2017	2017-09-22	na	na	HT-0378A	Not sequenced	NA	NA
MP1860	2017	2017-10-17	na	na	MK-0265	Not sequenced	NA	NA
MP1861	2017	2017-10-12	na	na	LK-0331	Not sequenced	NA	NA
MP1862	2017	2017-09-27	na	na	DP-0227A	Included	0.921328	yes
MP1863	2017	2017-10-03	na	na	KK-0246	Not sequenced	NA	NA
MP1864	2017	2017-09-27	na	na	TK-0459	Not sequenced	NA	NA
MP1865	2017	2017-10-03	na	na	TK-0306	Included	0.928975	yes
MP1866	2017	2017-10-17	na	na	HB-11007	Not sequenced	NA	NA
MP1867	2017	2017-10-06	na	na	HS-0364	Not sequenced	NA	NA
MP1868	2017	2017-10-02	na	na	MT-0342A	Low coverage	NA	NA
MP1869	2017	2017-10-18	na	na	HL-0365A	Included	0.93313	yes
MP1870	2017	2017-10-04	na	na	KL-0268A	Not sequenced	NA	NA
MP1871	2017	2017-09-21	2016-03-18	after	DH-0315A	Low coverage	NA	NA
MP1872	2017	2017-10-11	na	na	HB-11007	Not sequenced	NA	NA
MP1873	2017	2017-09-25	na	na	KL-0268A	Not sequenced	NA	NA
MP1874	2017	2017-09-20	na	na	AR-0267A	Not sequenced	NA	NA
MP1875	2017	2017-10-12	na	na	KL-0268A	Not sequenced	NA	NA
MP1876	2017	2017-10-02	na	na	KW-0296A	Not sequenced	NA	NA
MP1877	2017	2017-10-05	2016-03-18	after	DH-0315A	Not sequenced	NA	NA
MP1878	2017	2017-09-25	na	na	KK-0246	Not sequenced	NA	NA
MP1879	2017	2017-10-03	na	na	TK-0306	Not sequenced	NA	NA
MP1880	2017	2017-10-16	na	na	TK-0306	Included	0.936182	yes
MP1881	2017	2017-10-17	na	na	ML-0380A	Included	0.948353	yes
MP1882	2017	2017-10-16	na	na	TK-0306	Not sequenced	NA	NA
MP1883	2017	2017-09-26	na	na	WW-0381	Not sequenced	NA	NA
MP1884	2017	2017-10-02	na	na	PN-11048	Not sequenced	NA	NA
MP1885	2017	2017-09-26	na	na	DP-0227A	Not sequenced	NA	NA
MP1886	2017	2017-10-02	2015-02-18	after	KT-0219	Not sequenced	NA	NA
MP1887	2017	2017-09-28	na	na	KN-0217A	Included	0.926714	yes
MP1888	2017	2017-09-21	na	na	KP-11046A	Not sequenced	NA	NA
MP1889	2017	2017-10-14	na	na	MK-11047	Included	0.905219	yes
MP1890	2017	2017-09-19	na	na	WW-0381	Included	0.939314	yes
MP1891	2017	2017-10-13	na	na	KL-0268A	Not sequenced	NA	NA
MP1892	2017	2017-10-09	na	na	KL-0268A	Included	0.960617	yes
MP1893	2017	2017-10-04	na	na	KH-0213A	Not sequenced	NA	NA
MP1894	2017	2017-10-06	na	na	BB-0316	Included	0.957833	yes
MP1895	2017	2017-09-18	2016-03-13	after	TK-0384A	Not sequenced	NA	NA
MP1896	2017	2017-10-20	na	na	KL-11013	Not sequenced	NA	NA
MP1897	2017	2017-09-28	na	na	KN-0217A	Not sequenced	NA	NA
MP1898	2017	2017-09-26	2016-03-20	after	PN-0199A	Not sequenced	NA	NA
MP1899	2017	2017-09-25	2016-03-14	after	PL-0327A	Included	0.964124	yes
MP1900	2017	2017-09-22	na	na	DP-0227A	Included	0.96266	yes
MP1901	2017	2017-09-26	na	na	DP-0227A	Included	0.968096	yes
MP1902	2017	2017-09-20	na	na	NN-0291A	Included	0.964159	yes
MP1903	2017	2017-09-28	na	na	KN-0217A	Not sequenced	NA	NA
MP1904	2017	2017-09-22	na	na	BB-0316	Not sequenced	NA	NA
MP1905	2017	2017-10-12	na	na	HT-0378B	Not sequenced	NA	NA
MP1906	2017	2017-10-06	na	na	KN-0217A	Included	0.957953	yes
MP1907	2017	2017-10-19	na	na	HB-0340A	Included	0.955105	yes
MP1908	2017	2017-10-04	na	na	KN-0217A	Not sequenced	NA	NA
MP1909	2017	2017-10-18	na	na	OT-0268D	Included	0.958912	yes
MP1910	2017	2017-10-05	na	na	KL-0268A	Not sequenced	NA	NA
MP1911	2017	2017-10-13	na	na	HT-0378B	Not sequenced	NA	NA
MP1912	2017	2017-10-17	na	na	ML-0380A	Included	0.956836	yes
MP1913	2017	2017-10-12	na	na	KP-0344B	Not sequenced	NA	NA
MP1914	2017	2017-10-16	na	na	HB-0340A	Included	0.629669	no
MP1915	2017	2017-10-19	na	na	PP-11050A	Not sequenced	NA	NA
MP1916	2017	2017-10-03	na	na	KN-0293A	Not sequenced	NA	NA
MP1917	2017	2017-09-19	na	na	MK-0265	Included	0.959283	yes
MP1918	2017	2017-10-03	2016-03-13	after	MT-193A	Not sequenced	NA	NA
MP1919	2017	2017-10-22	na	na	HB-0340A	Not sequenced	NA	NA
MP1920	2017	2017-10-02	na	na	KW-0296A	Not sequenced	NA	NA
MP1921	2017	2017-10-09	na	na	KW-0296A	Low coverage	NA	NA
MP1922	2017	2017-10-29	na	na	KK-0528	Not sequenced	NA	NA
MP1923	2017	2017-10-28	na	na	NL-12174	Low coverage	NA	NA
MP1924	2017	2017-10-06	na	na	WL-0546	Low coverage	NA	NA
MP1925	2017	2017-10-07	na	na	MW-0872	Not sequenced	NA	NA
MP1926	2017	2017-11-06	na	na	LP-0888	Not sequenced	NA	NA
MP1927	2017	2017-11-18	na	na	KW-0473	Not sequenced	NA	NA
MP1928	2017	2017-11-18	na	na	KW-0473	Not sequenced	NA	NA
MP1929	2017	2017-11-17	na	na	KW-0473	Not sequenced	NA	NA
MP1930	2017	2017-11-27	na	na	KW-0473	Not sequenced	NA	NA
MP1931	2017	2017-11-17	na	na	KW-0473	Low coverage	NA	NA
MP1932	2017	2017-11-18	na	na	KW-0473	Not sequenced	NA	NA
MP1933	2017	2017-11-18	na	na	KW-0473	Not sequenced	NA	NA
MP1934	2017	2017-11-14	na	na	TN-0721	Not sequenced	NA	NA
MP1935	2017	2017-12-06	na	na	KW-0473	Not sequenced	NA	NA
MP1936	2017	2017-06-14	na	na	HP-0834	Not sequenced	NA	NA
MP1937	2017	2017-06-06	na	na	KL-0845	Included	0.96211	yes
MP1938	2017	2017-06-06	na	na	KL-0845	Included	0.9624	yes
MP1939	2017	2017-06-13	na	na	HP-0834	Low coverage	NA	NA
MP1940	2017	2017-06-12	na	na	HP-0834	Included	0.957498	yes
MP1941	2017	2017-06-13	na	na	HP-0834	Low coverage	NA	NA
MP1942	2017	2017-06-05	na	na	MC-0392A	Low coverage	NA	NA
MP1943	2017	2017-06-08	2016-08-31	after	PL-0366	Included	0.94572	yes
MP1944	2017	2017-06-06	na	na	MC-0392A	Included	0.948188	yes
MP1945	2017	2017-06-14	2016-03-13	after	TK-0384A	Not sequenced	NA	NA
MP1946	2017	2017-06-01	2016-08-31	after	PL-0366	Not sequenced	NA	NA
MP1947	2017	2017-06-13	na	na	MM-11004	Not sequenced	NA	NA
MP1948	2017	2017-05-30	na	na	MM-11004	Not sequenced	NA	NA
MP1949	2017	2017-06-08	2016-08-31	after	PL-0366	Not sequenced	NA	NA
MP1950	2017	2017-06-05	2016-08-31	after	PL-0366	Low coverage	NA	NA
MP1951	2017	2017-06-06	2016-03-13	after	TK-0384A	Not sequenced	NA	NA
MP1952	2017	2017-06-19	na	na	KP-11065	Included	0.953053	yes
MP1953	2017	2017-06-15	2016-08-31	after	PL-0366	Not sequenced	NA	NA
MP1954	2017	2017-06-14	2016-08-31	after	PL-0366	Not sequenced	NA	NA
MP1955	2017	2017-06-13	2016-08-31	after	PL-0366	Not sequenced	NA	NA
MP1956	2017	2017-06-19	na	na	KT-0346B	Not sequenced	NA	NA
MP1957	2017	2017-11-09	na	na	PK-0406A	Not sequenced	NA	NA
MP1958	2017	2017-11-15	na	na	KM-0123A	Not sequenced	NA	NA
MP1959	2017	2017-11-02	na	na	PK-0406A	Included	0.951303	yes
MP1960	2017	2017-10-26	na	na	HS-0364	Low coverage	NA	NA
MP1961	2017	2017-11-26	na	na	MK-0447	Not sequenced	NA	NA
MP1962	2017	2017-10-24	na	na	MK-0447	Not sequenced	NA	NA
MP1963	2017	2017-11-11	na	na	HS-0364	Not sequenced	NA	NA
MP1964	2017	2017-11-02	na	na	PK-0406A	Included	0.948667	yes
MP1965	2017	2017-11-02	na	na	PK-0406A	Included	0.952435	yes
MP1966	2017	2017-10-31	na	na	PK-0406A	Included	0.9429	yes
MP1967	2017	2017-11-04	na	na	MW-0176	Not sequenced	NA	NA
MP1968	2017	2017-11-14	2017-07-11	after	WM-0367	Included	0.953329	yes
MP1969	2017	2017-11-03	2017-07-11	after	WM-0367	Not sequenced	NA	NA
MP1970	2017	2017-11-02	2017-07-11	after	WM-0367	Included	0.956749	yes
MP1971	2017	2017-11-03	2016-03-13	after	MT-193A	Included	0.956396	yes
MP1972	2017	2017-10-31	2016-03-13	after	MT-193A	Not sequenced	NA	NA
MP1973	2017	2017-10-31	na	na	KN-0217A	Included	0.950657	yes
MP1974	2017	2017-11-07	2015-08-09	after	PD-0372	Included	0.955795	yes
MP1975	2017	2017-11-23	na	na	KN-0217A	Not sequenced	NA	NA
MP1976	2017	2017-11-23	na	na	KN-0217A	Low coverage	NA	NA
MP1977	2017	2017-11-25	na	na	KN-0217A	Not sequenced	NA	NA
MP1978	2017	2017-10-23	na	na	MK-0265	Included	0.944345	yes
MP1979	2017	2017-11-06	na	na	BB-0316	Included	0.957976	yes
MP1980	2017	2017-11-06	na	na	PK-0406A	Not sequenced	NA	NA
MP1981	2017	2017-10-26	na	na	NB-11051A	Not sequenced	NA	NA
MP1982	2017	2017-11-07	2016-03-20	after	PN-0199A	Not sequenced	NA	NA
MP1983	2017	2017-11-07	na	na	BB-0316	Included	0.955729	yes
MP1984	2017	2017-11-14	2016-03-13	after	MT-193A	Not sequenced	NA	NA
MP1985	2017	2017-11-13	na	na	DB-0145B	Low coverage	NA	NA
MP1986	2017	2017-11-03	na	na	HL-0221A	Not sequenced	NA	NA
MP1987	2017	2017-10-26	na	na	HS-0364	Not sequenced	NA	NA
MP1988	2017	2017-10-31	na	na	MT-0432	Included	0.952632	yes
MP1989	2017	2017-11-17	na	na	ML-0458A	Not sequenced	NA	NA
MP1990	2017	2017-10-23	na	na	LP-214A	Included	0.944685	yes
MP1991	2017	2017-10-24	na	na	PN-0196	Included	0.957679	yes
MP1992	2017	2017-10-26	na	na	ML-0458A	Included	0.957187	yes
MP1993	2017	2017-10-23	na	na	KM-0123A	Included	0.959966	yes
MP1994	2017	2017-11-01	na	na	MT-0432	Not sequenced	NA	NA
MP1995	2017	2017-11-24	na	na	ML-0458A	Included	0.964718	yes
MP1996	2017	2017-10-31	na	na	LK-0331	Not sequenced	NA	NA
MP1997	2017	2017-11-21	2016-08-31	after	PL-0366	Not sequenced	NA	NA
MP1998	2017	2017-11-07	na	na	NB-11054A	Included	0.950185	yes
MP1999	2017	2017-11-21	2016-08-31	after	PL-0366	Included	0.965229	yes
MP2000	2017	2017-10-27	na	na	KP-11046A	Included	0.958273	yes
MP2001	2017	2017-11-23	na	na	DP-0227A	Included	0.970735	yes
MP2002	2017	2017-11-22	na	na	HK-0277A	Included	0.965712	yes
MP2003	2017	2017-10-31	na	na	ET-11063	Included	0.641956	no
MP2004	2017	2017-11-25	na	na	DP-0227A	Not sequenced	NA	NA
MP2005	2017	2017-11-08	na	na	PK-0406A	Included	0.945984	yes
MP2006	2017	2017-11-25	na	na	DP-0227A	Included	0.962911	yes
MP2007	2017	2017-11-24	na	na	DP-0227A	Included	0.962569	yes
MP2008	2017	2017-11-08	na	na	MK-11003	Included	0.954676	yes
MP2009	2017	2017-10-30	na	na	LK-0331	Not sequenced	NA	NA
MP2010	2017	2017-11-07	na	na	KL-0268E	Not sequenced	NA	NA
MP2011	2017	2017-11-02	na	na	HB-11007	Included	0.958654	yes
MP2012	2017	2017-11-02	na	na	KL-0268E	Included	0.966111	yes
MP2013	2017	2017-11-05	na	na	MK-11003	Not sequenced	NA	NA
MP2014	2017	2017-10-26	na	na	OT-0268D	Low coverage	NA	NA
MP2015	2017	2017-10-30	na	na	KL-0268A	Low coverage	NA	NA
MP2016	2017	2017-11-10	na	na	LK-0331	Included	0.909694	yes
MP2017	2017	2017-11-10	na	na	LK-0331	Not sequenced	NA	NA
MP2018	2017	2017-11-10	na	na	LK-0331	Included	0.931988	yes
MP2019	2017	2017-11-22	na	na	ET-0185	Not sequenced	NA	NA
MP2020	2017	2017-10-24	na	na	KL-0268A	Included	0.870448	no
MP2021	2017	2017-10-24	na	na	TK-0306	Not sequenced	NA	NA
MP2022	2017	2017-10-27	na	na	TK-0306	Not sequenced	NA	NA
MP2023	2017	2017-11-06	2017-07-04	after	NT-0361	Not sequenced	NA	NA
MP2024	2017	2017-10-01	na	na	KL-11013	Included	0.947244	yes
MP2025	2017	2017-11-25	na	na	DB-0145B	Not sequenced	NA	NA
MP2026	2017	2017-11-08	na	na	PK-0406A	Included	0.933605	yes
MP2027	2017	2017-10-25	na	na	KK-0246	Not sequenced	NA	NA
MP2028	2017	2017-10-30	na	na	KK-0246	Not sequenced	NA	NA
MP2029	2017	2017-11-21	na	na	HL-0221A	Included	0.943517	yes
MP2030	2017	2017-11-21	na	na	DB-0145B	Not sequenced	NA	NA
MP2031	2017	2017-11-08	na	na	DB-0145B	Included	0.936632	yes
MP2032	2017	2017-11-21	na	na	KW-11056A	Not sequenced	NA	NA
MP2033	2017	2017-10-30	na	na	KN-0217A	Included	0.927152	yes
MP2034	2017	2017-10-23	na	na	PK-0330A	Not sequenced	NA	NA
MP2035	2017	2017-10-28	na	na	KP-11046A	Included	0.947145	yes
MP2036	2017	2017-10-25	2016-09-03	after	WT-0314A	Included	0.934138	yes
MP2037	2017	2017-11-08	na	na	MT-0432	Not sequenced	NA	NA
MP2038	2017	2017-11-07	na	na	MK-0265	Included	0.947582	yes
MP2039	2017	2017-10-23	na	na	PP-11050A	Included	0.952554	yes
MP2040	2017	2017-10-25	na	na	KP-11046A	Not sequenced	NA	NA
MP2041	2017	2017-11-11	na	na	TK-183A	Included	0.939176	yes
MP2042	2017	2017-11-08	na	na	MK-0265	Not sequenced	NA	NA
MP2043	2017	2017-11-20	na	na	OT-0268D	Not sequenced	NA	NA
MP2044	2017	2017-11-23	na	na	LK-0331	Included	0.874127	no
MP2045	2017	2017-11-01	2016-09-03	after	WT-0314A	Included	0.943979	yes
MP2046	2017	2017-10-31	2016-09-03	after	WT-0314A	Included	0.944551	yes
MP2047	2017	2017-10-30	na	na	NB-11051A	Included	0.941318	yes
MP2048	2017	2017-11-23	na	na	MM-11004	Not sequenced	NA	NA
MP2049	2017	2017-11-21	na	na	DL-262A	Not sequenced	NA	NA
MP2050	2017	2017-11-15	2017-06-24	after	MM-0363A	Included	0.932985	yes
MP2051	2017	2017-11-21	2017-06-24	after	MM-0363A	Included	0.935013	yes
MP2052	2017	2017-11-11	na	na	HS-0364	Included	0.906557	yes
MP2053	2017	2017-11-01	2016-09-03	after	WT-0314A	Included	0.949073	yes
MP2054	2017	2017-11-13	2017-07-04	after	NT-0361	Not sequenced	NA	NA
MP2055	2017	2017-11-08	na	na	HL-0221A	Included	0.942135	yes
MP2056	2017	2017-11-20	na	na	KL-0268A	Not sequenced	NA	NA
MP2057	2017	2017-11-16	na	na	LK-0331	Not sequenced	NA	NA
MP2058	2017	2017-10-23	2017-07-04	after	NT-0361	Included	0.939159	yes
MP2059	2017	2017-11-24	na	na	KL-0268A	Included	0.931759	yes
MP2060	2017	2017-11-02	2016-03-18	after	DH-0315A	Not sequenced	NA	NA
MP2061	2017	2017-10-23	na	na	MN-268C	Included	0.948088	yes
MP2062	2017	2017-11-20	2020-05-02	before	LH-0266B	Not sequenced	NA	NA
MP2063	2017	2017-11-21	2016-09-03	after	WT-0314A	Not sequenced	NA	NA
MP2064	2017	2017-11-07	na	na	NB-11054A	Included	0.933528	yes
MP2065	2017	2017-11-07	2016-09-03	after	WT-0314A	Not sequenced	NA	NA
MP2066	2017	2017-11-08	2016-09-03	after	WT-0314A	Not sequenced	NA	NA
MP2067	2017	2017-10-26	2016-09-03	after	WT-0314A	Not sequenced	NA	NA
MP2068	2017	2017-11-03	na	na	MK-0265	Included	0.932577	yes
MP2069	2017	2017-11-04	na	na	KN-0293A	Not sequenced	NA	NA
MP2070	2017	2017-11-08	2016-09-03	after	WT-0314A	Included	0.935251	yes
MP2071	2017	2017-11-11	2015-08-09	after	PD-0372	Not sequenced	NA	NA
MP2072	2017	2017-11-08	na	na	KN-0293A	Not sequenced	NA	NA
MP2073	2017	2017-11-08	na	na	NB-11054A	Included	0.951038	yes
MP2074	2017	2017-10-25	na	na	TY-0329	Included	0.921852	yes
MP2075	2017	2017-11-30	2016-03-18	after	KW-0301A	Included	0.931404	yes
MP2076	2017	2017-11-10	na	na	KN-0293A	Low coverage	NA	NA
MP2077	2017	2017-11-13	na	na	KN-0293A	Included	0.958133	yes
MP2078	2017	2017-11-11	2016-09-03	after	WT-0314A	Not sequenced	NA	NA
MP2079	2017	2017-11-13	na	na	KL-11013	Not sequenced	NA	NA
MP2080	2017	2017-11-09	na	na	KW-11056A	Not sequenced	NA	NA
MP2081	2017	2017-11-20	na	na	PP-0240	Low coverage	NA	NA
MP2082	2017	2017-10-31	na	na	DB-0145B	Not sequenced	NA	NA
MP2083	2017	2017-08-01	na	na	HS-0364	Not sequenced	NA	NA
MP2084	2017	2017-08-07	na	na	HS-0364	Not sequenced	NA	NA
MP2085	2017	2017-08-15	na	na	HS-0364	Not sequenced	NA	NA
MP2086	2017	2017-11-13	na	na	KP-11046A	Not sequenced	NA	NA
MP2087	2017	2017-07-31	2017-07-12	after	TG-0357	Not sequenced	NA	NA
MP2088	2017	2017-11-09	na	na	KN-0293A	Not sequenced	NA	NA
MP2089	2017	2017-11-08	2016-09-03	after	WT-0314A	Not sequenced	NA	NA
MP2090	2017	2017-08-01	na	na	HS-0364	Not sequenced	NA	NA
MP2091	2017	2017-08-21	na	na	HS-0364	Not sequenced	NA	NA
MP2092	2017	2017-10-23	2016-09-03	after	WT-0314A	Included	0.940898	yes
MP2093	2017	2017-11-13	na	na	HB-11007	Not sequenced	NA	NA
MP2094	2017	2017-08-01	na	na	BK-0405A	Not sequenced	NA	NA
MP2095	2017	2017-08-21	na	na	HS-0364	Included	0.94781	yes
MP2096	2017	2017-11-06	2016-09-03	after	WT-0314A	Included	0.934326	yes
MP2097	2017	2017-07-24	2017-07-12	after	TG-0357	Not sequenced	NA	NA
MP2098	2017	2017-10-29	na	na	HB-0340A	Included	0.634381	no
MP2099	2017	2017-11-21	na	na	HS-0364	Included	0.965724	yes
MP2100	2017	2017-10-23	na	na	HB-0340A	Included	0.575266	no
MP2101	2017	2017-10-27	na	na	PH-0356A	Not sequenced	NA	NA
MP2102	2017	2017-10-22	na	na	HB-0340A	Included	0.483265	no
MP2103	2017	2017-10-29	na	na	HB-0340A	Not sequenced	NA	NA
MP2104	2017	2017-10-27	na	na	NL-0368	Included	0.957207	yes
MP2105	2017	2017-11-01	na	na	HT-0378A	Included	0.926419	yes
MP2106	2017	2017-11-02	na	na	PH-0356B	Included	0.794484	no
MP2107	2017	2017-11-02	na	na	HB-0340A	Included	0.949453	yes
MP2108	2017	2017-11-01	na	na	HB-0340A	Low coverage	NA	NA
MP2109	2017	2017-11-20	na	na	HB-0340A	Included	0.957112	yes
MP2110	2017	2017-10-26	na	na	HB-0340A	Included	0.61631	no
MP2111	2017	2017-11-24	na	na	HB-0340A	Not sequenced	NA	NA
MP2112	2017	2017-11-03	na	na	HB-0340A	Not sequenced	NA	NA
MP2113	2017	2017-11-20	na	na	HS-0364	Not sequenced	NA	NA
MP2114	2017	2017-10-28	na	na	HB-0340A	Not sequenced	NA	NA
MP2115	2017	2017-11-20	na	na	PS-11064A	Included	0.962731	yes
MP2116	2017	2017-11-20	na	na	KP-0344A	Included	0.963746	yes
MP2117	2017	2017-11-15	na	na	KP-0344B	Low coverage	NA	NA
MP2118	2017	2017-11-22	na	na	PS-11064A	Included	0.963745	yes
MP2119	2017	2017-11-13	na	na	HL-0365A	Included	0.950811	yes
MP2120	2017	2017-11-23	na	na	PS-11064A	Included	0.958517	yes
MP2121	2017	2017-11-04	na	na	LL-13092	Not sequenced	NA	NA
MP2122	2017	2017-11-09	na	na	KP-0344A	Included	0.958403	yes
MP2123	2017	2017-11-06	na	na	PS-11064A	Included	0.963697	yes
MP2124	2017	2017-12-02	na	na	HW-13077	Not sequenced	NA	NA
MP2125	2017	2017-11-17	na	na	PS-11064A	Included	0.961644	yes
MP2126	2017	2017-11-13	na	na	PS-11064A	Included	0.958416	yes
MP2127	2017	2017-11-19	na	na	PS-11064A	Included	0.955814	yes
MP2128	2017	2017-11-20	na	na	KP-0344A	Included	0.959414	yes
MP2129	2017	2017-11-13	na	na	KW-11056A	Not sequenced	NA	NA
MP2130	2017	2017-11-17	na	na	HS-0364	Included	0.95489	yes
MP2131	2017	2017-11-13	na	na	NB-11054A	Not sequenced	NA	NA
MP2132	2017	2017-11-18	na	na	KL-0028	Not sequenced	NA	NA
MP2133	2017	2017-08-14	na	na	HB-0211	Not sequenced	NA	NA
MP2134	2017	2017-11-14	na	na	MK-11003	Included	0.93764	yes
MP2135	2017	2017-11-22	na	na	KK-0246	Not sequenced	NA	NA
MP2136	2017	2017-08-16	na	na	BK-0405A	Included	0.956615	yes
MP2137	2017	2017-08-20	na	na	HT-0378A	Included	0.959863	yes
MP2138	2017	2017-11-11	2016-09-03	after	WT-0314A	Included	0.939501	yes
MP2139	2017	2017-11-07	na	na	KW-11056A	Not sequenced	NA	NA
MP2140	2017	2017-11-17	na	na	OT-0268D	Not sequenced	NA	NA
MP2141	2017	2017-07-17	na	na	ML-0515	Not sequenced	NA	NA
MP2142	2017	2017-07-19	na	na	ML-0515	Not sequenced	NA	NA
MP2143	2017	2017-07-17	na	na	ML-0515	Not sequenced	NA	NA
MP2144	2017	2017-07-17	na	na	ML-0515	Not sequenced	NA	NA
MP2145	2017	2017-06-27	na	na	HK-0844	Not sequenced	NA	NA
MP2146	2017	2017-06-29	na	na	HK-0844	Not sequenced	NA	NA
MP2147	2017	2017-07-18	na	na	HK-0844	Not sequenced	NA	NA
MP2148	2017	2017-06-30	na	na	NA	Not sequenced	NA	NA
MP2149	2017	2017-07-17	na	na	HK-0844	Not sequenced	NA	NA
MP2150	2017	2017-07-04	na	na	HW-0842	Not sequenced	NA	NA
MP2151	2017	2017-06-12	na	na	DB-0239A	Not sequenced	NA	NA
MP2152	2017	2017-07-03	na	na	PT-0216	Not sequenced	NA	NA
MP2153	2017	2017-07-26	na	na	KM-0123A	Not sequenced	NA	NA
MP2154	2017	2017-12-22	na	na	LP-0888	Not sequenced	NA	NA
MP2155	2017	2017-12-18	na	na	HK-0601	Not sequenced	NA	NA
MP2156	2017	2017-11-27	na	na	HT-12137	Not sequenced	NA	NA
MP2157	2017	2017-11-28	na	na	YC-12321	Not sequenced	NA	NA
MP2158	2017	2017-12-29	na	na	HK-0601	Not sequenced	NA	NA
MP2159	2017	2017-12-18	na	na	HK-0601	Not sequenced	NA	NA
MP2160	2017	2017-12-05	2017-06-24	after	MM-0363A	Included	0.954615	yes
MP2161	2017	2017-12-11	2015-09-12	after	HT-0323	Included	0.950484	yes
MP2162	2017	2017-12-06	na	na	MM-11004	Included	0.959629	yes
MP2163	2017	2017-12-06	na	na	ML-0363B	Not sequenced	NA	NA
MP2164	2017	2017-12-13	na	na	TK-0306	Not sequenced	NA	NA
MP2165	2017	2017-12-14	na	na	ML-0458A	Low coverage	NA	NA
MP2166	2017	2017-12-04	na	na	MM-11004	Not sequenced	NA	NA
MP2167	2017	2017-12-12	na	na	TK-0306	Not sequenced	NA	NA
MP2168	2017	2017-12-11	na	na	KL-0268A	Included	0.949998	yes
MP2169	2017	2017-12-11	na	na	NG-0359A	Not sequenced	NA	NA
MP2170	2017	2017-12-11	na	na	KL-0268B	Not sequenced	NA	NA
MP2171	2017	2017-12-07	2016-09-03	after	WT-0314A	Not sequenced	NA	NA
MP2172	2017	2017-12-14	na	na	MM-0181	Included	0.950704	yes
MP2173	2017	2017-12-06	na	na	LK-0331	Low coverage	NA	NA
MP2174	2017	2017-12-05	na	na	LK-0331	Included	0.850818	no
MP2175	2017	2017-12-07	na	na	LK-0331	Included	0.961714	yes
MP2176	2017	2017-12-08	na	na	KP-11046A	Not sequenced	NA	NA
MP2177	2017	2017-12-05	na	na	NB-11054A	Not sequenced	NA	NA
MP2178	2017	2017-12-12	na	na	HK-0844	Not sequenced	NA	NA
MP2179	2017	2017-11-28	na	na	PK-0406A	Included	0.9473	yes
MP2180	2017	2017-12-05	na	na	MK-0265	Not sequenced	NA	NA
MP2181	2017	2017-12-11	na	na	TK-0306	Not sequenced	NA	NA
MP2182	2017	2017-12-07	na	na	LK-0331	Low coverage	NA	NA
MP2183	2017	2017-12-08	na	na	MK-11003	Included	0.954732	yes
MP2184	2017	2017-12-11	na	na	PP-0240	Not sequenced	NA	NA
MP2185	2017	2017-12-06	na	na	LF-0284	Included	0.961855	yes
MP2186	2017	2017-12-13	na	na	KL-0268E	Included	0.95486	yes
MP2187	2017	2017-11-27	na	na	MK-0265	Included	0.956871	yes
MP2188	2017	2017-12-11	na	na	KL-0268A	Included	0.9602	yes
MP2189	2017	2017-12-08	2020-05-02	before	LH-0266B	Included	0.971321	yes
MP2190	2017	2017-12-01	na	na	LF-0284	Not sequenced	NA	NA
MP2191	2017	2017-11-29	na	na	WT-11053A	Included	0.957131	yes
MP2192	2017	2017-12-06	na	na	MG-0261B	Not sequenced	NA	NA
MP2193	2017	2017-12-13	na	na	LK-0331	Included	0.913336	yes
MP2194	2017	2017-11-27	2016-08-31	after	PL-0366	Included	0.960576	yes
MP2195	2017	2017-12-15	2017-06-24	after	MM-0363A	Included	0.966606	yes
MP2196	2017	2017-12-06	na	na	MM-11004	Included	0.772595	no
MP2197	2017	2017-12-07	na	na	MM-11004	Included	0.960283	yes
MP2198	2017	2017-12-04	na	na	DK-11049A	Included	0.925839	yes
MP2199	2017	2017-12-12	na	na	LK-0331	Not sequenced	NA	NA
MP2200	2017	2017-12-11	2017-07-04	after	TP-0339	Included	0.925338	yes
MP2201	2017	2017-12-04	na	na	DK-11049A	Not sequenced	NA	NA
MP2202	2017	2017-12-11	na	na	LK-0331	Not sequenced	NA	NA
MP2203	2017	2017-12-02	na	na	MM-0181	Included	0.918233	yes
MP2204	2017	2017-12-04	na	na	BB-0316	Not sequenced	NA	NA
MP2205	2017	2017-12-07	2020-05-02	before	LH-0266B	Not sequenced	NA	NA
MP2206	2017	2017-11-27	2016-03-19	after	HK-0303A	Not sequenced	NA	NA
MP2207	2017	2017-12-06	na	na	WW-0381	Included	0.93068	yes
MP2208	2017	2017-12-11	na	na	MW-0176	Included	0.943126	yes
MP2209	2017	2017-12-02	2016-03-19	after	HK-0303A	Not sequenced	NA	NA
MP2210	2017	2017-12-11	na	na	LK-0331	Included	0.923308	yes
MP2211	2017	2017-12-08	na	na	KN-0217A	Included	0.656249	no
MP2212	2017	2017-12-08	na	na	KK-0246	Not sequenced	NA	NA
MP2213	2017	2017-12-06	na	na	WN-095A	Included	0.931214	yes
MP2214	2017	2017-12-07	na	na	DB-0145B	Included	0.937007	yes
MP2215	2017	2017-12-05	na	na	OT-0268D	Not sequenced	NA	NA
MP2216	2017	2017-11-29	na	na	HL-0221A	Included	0.937587	yes
MP2217	2017	2017-12-06	na	na	LF-0284	Included	0.912901	yes
MP2218	2017	2017-12-09	na	na	ML-0458A	Low coverage	NA	NA
MP2219	2017	2017-12-05	na	na	PK-0406A	Included	0.931935	yes
MP2220	2017	2017-12-11	na	na	LK-0331	Not sequenced	NA	NA
MP2221	2017	2017-11-27	na	na	KN-0218	Not sequenced	NA	NA
MP2222	2017	2017-11-27	na	na	PN-0196	Included	0.944636	yes
MP2223	2017	2017-11-28	na	na	MM-11004	Not sequenced	NA	NA
MP2224	2017	2017-12-04	na	na	TK-0306	Not sequenced	NA	NA
MP2225	2017	2017-12-12	2015-02-11	after	HM-0292	Not sequenced	NA	NA
[truncated: 3,015 more rows]

## Sheet: Table S1.b 1726 single infected
SampleID	Collection date	MDA date	Collected before or after MDA	MP code	HCPC code	IBD cluster (r ≥ 0.9)	If representing a IBD cluster	pfkelch13	pfcrt_76	pfcrt_72-76[CVMNK]	pfcrt_others	pfaat1
METF.HRP.1	2015-11-18	na	na	NN-0287A	region17	Cluster1	no	R561H	Lys76Thr	CVIET	Ala220Ser,Gln271Glu,Asn326Ser,Ile356Thr,Arg371Ile	Phe313Ser,Ser258Leu
MP0306	2016-05-23	na	na	LW-0169	region12	Cluster1	no	R561H	Lys76Thr	CVIET	Ala220Ser,Gln271Glu,Ile356Thr,Arg371Ile	Phe313Ser,Ser258Leu
MP0307	2016-05-27	na	na	LW-0169	region12	Cluster1	no	R561H.G538D	Lys76Thr	CVIET	Ala220Ser,Gln271Glu,Asn326Ser	Phe313Ser,Ser258Leu
METF.HRP.25	2016-06-20	na	na	KP-0344A	region28	Cluster1	YES-2016	R561H	Lys76Thr	CVIET	Ala220Ser,Gln271Glu,Asn326Ser,Ile356Thr,Arg371Ile	Lys541Asn,Phe313Ser
METF.HRP.53	2016-06-20	na	na	KP-0344A	region28	Cluster1	no	R561H	Lys76Thr	CVIET	Ala220Ser,Gln271Glu,Asn326Ser,Ile356Thr,Arg371Ile	Lys541Asn,Phe313Ser
MS0007	2016-06-20	na	na	KP-0344A	region28	Cluster1	no	R561H	Lys76Thr	CVIET	Ala220Ser,Gln271Glu,Asn326Ser,Ile356Thr,Arg371Ile	Lys541Asn,Phe313Ser
MP0967	2017-03-04	na	na	MK-0428	region37	Cluster1	no	R561H.wt.mix	Lys76Thr	CVIET	Ala220Ser,Gln271Glu,Asn326Ser,Ile356Thr,Arg371Ile	Phe313Ser,Ser258Leu
MP0993	2017-04-24	na	na	PP-11050A	region14	Cluster1	no	R561H.wt.mix	Lys76Thr	CVIET	Ala220Ser,Gln271Glu,Asn326Ser,Ile356Thr,Arg371Ile	Phe313Ser,Ser258Leu
MP0995	2017-04-26	na	na	TK-183A	region12	Cluster1	no	R561H	Lys76Thr	CVIET	Ala220Ser,Gln271Glu,Asn326Ser,Ile356Thr,Arg371Ile	Phe313Ser,Ser258Leu
MP1178	2017-05-05	na	na	TK-183A	region12	Cluster1	no	R561H	Lys76Thr	CVIET	Ala220Ser,Gln271Glu,Asn326Ser,Ile356Thr,Arg371Ile	Phe313Ser,Ser258Leu
MP1170	2017-05-06	na	na	TK-183A	region12	Cluster1	no	R561H	Lys76Thr	CVIET	Ala220Ser,Gln271Glu,Asn326Ser,Ile356Thr,Arg371Ile	Phe313Ser,Ser258Leu
MP1545	2017-06-05	na	na	TK-183A	region12	Cluster1	no	R561H	Lys76Thr	CVIET	Ala220Ser,Gln271Glu,Asn326Ser,Ile356Thr,Arg371Ile	Phe313Ser,Ser258Leu
MP1612	2017-06-28	2020-05-02	before	HH-0431	region37	Cluster1	no	R561H	Lys76Thr	CVIET	Ala220Ser,Gln271Glu,Asn326Ser	Phe313Ser,Ser258Leu
MP1602	2017-07-19	na	na	KN-0217A	region15	Cluster1	no	R561H	na	na	Ala220Ser,Gln271Glu,Asn326Ser,Ile356Thr,Arg371Ile	Phe313Ser,Ser258Leu
MP1652	2017-07-20	na	na	DB-0145B	region10	Cluster1	no	R561H	Lys76Thr	CVIET	Ala220Ser,Gln271Glu,Asn326Ser,Ile356Thr,Arg371Ile	Phe313Ser,Ser258Leu
MP1647	2017-09-17	na	na	DB-0145A	region10	Cluster1	no	R561H	Lys76Thr	CVIET	Ala220Ser,Gln271Glu,Asn326Ser,Ile356Thr,Arg371Ile	Phe313Ser,Ser258Leu
MP1809	2017-09-18	na	na	HB-0434	region37	Cluster1	no	R561H	Lys76Thr	CVIET	Ala220Ser,Gln271Glu,Asn326Ser,Ile356Thr,Arg371Ile	Phe313Ser,Ser258Leu
MP1887	2017-09-28	na	na	KN-0217A	region15	Cluster1	no	R561H	Lys76Thr	CVIET	Ala220Ser,Gln271Glu,Asn326Ser,Ile356Thr,Arg371Ile	Phe313Ser,Ser258Leu
MP1906	2017-10-06	na	na	KN-0217A	region15	Cluster1	no	R561H	Lys76Thr	CVIET	Ala220Ser,Gln271Glu,Asn326Ser,Ile356Thr,Arg371Ile	Phe313Ser,Ser258Leu
MP1858	2017-10-16	na	na	KN-0217A	region15	Cluster1	no	R561H	Lys76Thr	CVIET	Ala220Ser,Gln271Glu,Asn326Ser,Ile356Thr,Arg371Ile	Phe313Ser,Ser258Leu
MP1833	2017-10-22	na	na	KH-0213A	region15	Cluster1	no	R561H	Lys76Thr	CVIET	Ala220Ser,Ile356Thr,Arg371Ile	Phe313Ser,Ser258Leu
MP1851	2017-10-22	na	na	KN-0217A	region15	Cluster1	no	R561H	Lys76Thr	CVIET	Ala220Ser,Gln271Glu,Asn326Ser,Ile356Thr,Arg371Ile	Phe313Ser,Ser258Leu
MP1993	2017-10-23	na	na	KM-0123A	region5	Cluster1	no	R561H	Lys76Thr	CVIET	Ala220Ser,Gln271Glu,Asn326Ser,Ile356Thr,Arg371Ile	Phe313Ser,Ser258Leu
MP1991	2017-10-24	na	na	PN-0196	region12	Cluster1	no	R561H	Lys76Thr	CVIET	Ala220Ser,Gln271Glu,Asn326Ser,Ile356Thr,Arg371Ile	Phe313Ser,Ser258Leu
MP2033	2017-10-30	na	na	KN-0217A	region15	Cluster1	no	R561H	Lys76Thr	CVIET	Ala220Ser,Gln271Glu,Asn326Ser,Ile356Thr,Arg371Ile	Phe313Ser,Ser258Leu
MP1973	2017-10-31	na	na	KN-0217A	region15	Cluster1	no	R561H	Lys76Thr	CVIET	Ala220Ser,Gln271Glu,Asn326Ser,Ile356Thr,Arg371Ile	Phe313Ser,Ser258Leu
MP1971	2017-11-03	2016-03-13	after	MT-193A	region12	Cluster1	no	R561H	Lys76Thr	CVIET	Ala220Ser,Gln271Glu,Asn326Ser,Ile356Thr,Arg371Ile	Phe313Ser,Ser258Leu
MP2041	2017-11-11	na	na	TK-183A	region12	Cluster1	no	R561H.wt.mix	Lys76Thr	CVIET	Ala220Ser,Gln271Glu,Asn326Ser,Ile356Thr,Arg371Ile	Phe313Ser,Ser258Leu
MP2222	2017-11-27	na	na	PN-0196	region12	Cluster1	no	R561H	Lys76Thr	CVIET	Ala220Ser,Gln271Glu,Asn326Ser,Ile356Thr,Arg371Ile	Phe313Ser,Ser258Leu
MP2336	2017-12-02	na	na	TK-183A	region12	Cluster1	YES-2017	R561H	Lys76Thr	CVIET	Ala220Ser,Gln271Glu,Asn326Ser,Ile356Thr,Arg371Ile	Phe313Ser,Ser258Leu
MP2319	2017-12-04	na	na	KN-0217A	region15	Cluster1	no	R561H	Lys76Thr	CVIET	Ala220Ser,Gln271Glu,Asn326Ser,Ile356Thr,Arg371Ile	Phe313Ser,Ser258Leu
MP2322	2017-12-04	na	na	KN-0217A	region15	Cluster1	no	R561H	Lys76Thr	CVIET	Ala220Ser,Gln271Glu,Asn326Ser,Ile356Thr,Arg371Ile	Phe313Ser,Ser258Leu
MP2349	2017-12-04	na	na	TT-106B	region9	Cluster1	no	R561H	Lys76Thr	CVIET	Ala220Ser,Gln271Glu,Asn326Ser,Ile356Thr,Arg371Ile	Phe313Ser,Ser258Leu
MP2283	2017-12-05	na	na	KB-0148	region10	Cluster1	no	R561H	Lys76Thr	CVIET	Ala220Ser,Gln271Glu,Asn326Ser,Ile356Thr,Arg371Ile	Phe313Ser,Ser258Leu
MP2308	2017-12-05	na	na	KN-0217A	region15	Cluster1	no	R561H	Lys76Thr	CVIET	Ala220Ser,Gln271Glu,Asn326Ser,Ile356Thr,Arg371Ile	Phe313Ser,Ser258Leu
MP2354	2017-12-05	na	na	DP-0227A	region15	Cluster1	no	R561H	Lys76Thr	CVIET	Ala220Ser,Gln271Glu,Asn326Ser,Ile356Thr,Arg371Ile	Phe313Ser,Ser258Leu
MP2213	2017-12-06	na	na	WN-095A	region9	Cluster1	no	R561H	Lys76Thr	CVIET	Ala220Ser,Gln271Glu,Asn326Ser,Ile356Thr,Arg371Ile	Phe313Ser,Ser258Leu
MP2257	2017-12-06	na	na	MW-0176	region12	Cluster1	no	R561H	Lys76Thr	CVIET	Ala220Ser,Gln271Glu,Asn326Ser,Ile356Thr,Arg371Ile	Phe313Ser,Ser258Leu
MP2289	2017-12-06	na	na	HL-0221A	region15	Cluster1	no	R561H	Lys76Thr	CVIET	Ala220Ser,Gln271Glu,Asn326Ser,Ile356Thr,Arg371Ile	Phe313Ser,Ser258Leu
MP2307	2017-12-06	na	na	TK-183A	region12	Cluster1	no	R561H	Lys76Thr	CVIET	Ala220Ser,Gln271Glu,Asn326Ser,Ile356Thr,Arg371Ile	Phe313Ser,Ser258Leu
MP2333	2017-12-06	na	na	KN-0217A	region15	Cluster1	no	R561H	Lys76Thr	CVIET	Ala220Ser,Gln271Glu,Asn326Ser,Ile356Thr,Arg371Ile	Phe313Ser,Ser258Leu
MP2214	2017-12-07	na	na	DB-0145B	region10	Cluster1	no	R561H	Lys76Thr	CVIET	Ala220Ser,Gln271Glu,Asn326Ser,Ile356Thr,Arg371Ile	Phe313Ser,Ser258Leu
MP2272	2017-12-07	na	na	LW-0169	region12	Cluster1	no	R561H	Lys76Thr	CVIET	Ala220Ser,Gln271Glu,Asn326Ser,Ile356Thr,Arg371Ile	Phe313Ser,Ser258Leu
MP2278	2017-12-08	na	na	PS-0149	region10	Cluster1	no	R561H	Lys76Thr	CVIET	Ala220Ser,Gln271Glu,Asn326Ser,Ile356Thr,Arg371Ile	Phe313Ser,Ser258Leu
MP2274	2017-12-09	na	na	LW-0169	region12	Cluster1	no	R561H	Lys76Thr	CVIET	Ala220Ser,Gln271Glu,Asn326Ser,Ile356Thr,Arg371Ile	Phe313Ser,Ser258Leu
MP2306	2017-12-09	2015-08-09	after	DL-0187A	region12	Cluster1	no	R561H	Lys76Thr	CVIET	Ala220Ser,Gln271Glu,Asn326Ser,Ile356Thr,Arg371Ile	Phe313Ser,Ser258Leu
MP2324	2017-12-09	na	na	ET-0182C	region29	Cluster1	no	R561H	Lys76Thr	CVIET	Ala220Ser,Gln271Glu,Asn326Ser,Ile356Thr,Arg371Ile	Phe313Ser,Ser258Leu
MP2328	2017-12-09	na	na	KH-0213A	region15	Cluster1	no	R561H	Lys76Thr	CVIET	Ala220Ser,Gln271Glu,Asn326Ser,Ile356Thr,Arg371Ile	Phe313Ser,Ser258Leu
MP2281	2017-12-10	2015-08-07	after	TK-151A	region10	Cluster1	no	R561H	Lys76Thr	CVIET	Ala220Ser,Gln271Glu,Asn326Ser,Ile356Thr,Arg371Ile	Phe313Ser,Ser258Leu
MP2208	2017-12-11	na	na	MW-0176	region12	Cluster1	no	R561H	Lys76Thr	CVIET	Ala220Ser,Gln271Glu,Asn326Ser,Ile356Thr,Arg371Ile	Phe313Ser,Ser258Leu
MP2377	2017-12-11	na	na	PS-0149	region10	Cluster1	no	R561H	Lys76Thr	CVIET	Ala220Ser,Gln271Glu,Asn326Ser,Ile356Thr,Arg371Ile	Phe313Ser,Ser258Leu
MP2682	2017-12-11	na	na	KH-0213A	region15	Cluster1	no	R561H	Lys76Thr	CVIET	Ala220Ser,Gln271Glu,Asn326Ser,Ile356Thr,Arg371Ile	Phe313Ser,Ser258Leu
MP2681	2017-12-13	na	na	KH-0213A	region15	Cluster1	no	R561H	Lys76Thr	CVIET	Ala220Ser,Gln271Glu,Asn326Ser,Ile356Thr,Arg371Ile	Phe313Ser,Ser258Leu
MP2613	2017-12-14	na	na	KH-0213A	region15	Cluster1	no	R561H	Lys76Thr	CVIET	Ala220Ser,Gln271Glu,Asn326Ser,Ile356Thr,Arg371Ile	Phe313Ser,Ser258Leu
MP2460	2017-12-15	na	na	TK-183A	region12	Cluster1	no	R561H	Lys76Thr	CVIET	Ala220Ser,Gln271Glu,Asn326Ser,Ile356Thr,Arg371Ile	Phe313Ser,Ser258Leu
MP2461	2017-12-15	na	na	KN-0217A	region15	Cluster1	no	R561H	Lys76Thr	CVIET	Ala220Ser,Gln271Glu,Asn326Ser,Ile356Thr,Arg371Ile	Phe313Ser,Ser258Leu
MP2503	2017-12-15	na	na	TK-183A	region12	Cluster1	no	R561H	Lys76Thr	CVIET	Ala220Ser,Gln271Glu,Asn326Ser,Ile356Thr,Arg371Ile	Phe313Ser,Ser258Leu
MP2704	2017-12-15	na	na	LP-214A	region12	Cluster1	no	R561H.wt.mix	Lys76Thr	CVIET	Ala220Ser,Gln271Glu,Asn326Ser,Ile356Thr,Arg371Ile	Phe313Ser,Ser258Leu
MP2538	2017-12-16	na	na	KH-0213A	region15	Cluster1	no	R561H	Lys76Thr	CVIET	Ala220Ser,Gln271Glu,Asn326Ser,Ile356Thr,Arg371Ile	Phe313Ser,Ser258Leu
MP2268	2017-12-17	na	na	MW-0176	region12	Cluster1	no	R561H.wt.mix	Lys76Thr	CVIET	Ala220Ser,Gln271Glu,Asn326Ser,Ile356Thr,Arg371Ile	Phe313Ser,Ser258Leu
MP2690	2017-12-18	na	na	KH-0213A	region15	Cluster1	no	R561H	Lys76Thr	CVIET	Ala220Ser,Gln271Glu,Asn326Ser,Ile356Thr,Arg371Ile	Phe313Ser,Ser258Leu
MP2705	2017-12-18	na	na	TK-183A	region12	Cluster1	no	R561H	Lys76Thr	CVIET	Ala220Ser,Gln271Glu,Asn326Ser,Ile356Thr,Arg371Ile	Phe313Ser,Ser258Leu
MP2683	2017-12-20	na	na	KH-0213A	region15	Cluster1	no	R561H	Lys76Thr	CVIET	Ala220Ser,Gln271Glu,Asn326Ser,Ile356Thr,Arg371Ile	Phe313Ser,Ser258Leu
MP2706	2017-12-23	2016-03-11	after	NG-0807A	region10	Cluster1	no	R561H	Lys76Thr	CVIET	Ala220Ser,Gln271Glu,Asn326Ser,Ile356Thr,Arg371Ile	Phe313Ser,Ser258Leu
MP2420	2017-12-26	2015-08-07	after	TK-151A	region10	Cluster1	no	R561H	Lys76Thr	CVIET	Ala220Ser,Gln271Glu,Asn326Ser,Ile356Thr,Arg371Ile	Phe313Ser,Ser258Leu
MP2750	2017-12-26	na	na	LK-0122	region7	Cluster1	no	R561H	Lys76Thr	CVIET		Phe313Ser,Ser258Leu
MP2528	2017-12-27	na	na	DP-0227A	region15	Cluster1	no	R561H	Lys76Thr	CVIET	Ala220Ser,Gln271Glu,Asn326Ser,Ile356Thr,Arg371Ile	Phe313Ser,Ser258Leu
MP2701	2017-12-29	na	na	MT-207A	region12	Cluster1	no	R561H.wt.mix	Lys76Thr	CVIET	Ala220Ser,Gln271Glu,Ile356Thr,Arg371Ile	Phe313Ser,Ser258Leu
MP2689	2018-01-03	2016-03-13	after	MT-193A	region12	Cluster1	no	R561H	Lys76Thr	CVIET	Ala220Ser,Gln271Glu,Asn326Ser,Ile356Thr,Arg371Ile	Phe313Ser,Ser258Leu
MP2498	2018-01-06	na	na	ML-0458A	region38	Cluster1	no	R561H	Lys76Thr	CVIET	Ala220Ser,Gln271Glu,Asn326Ser,Ile356Thr,Arg371Ile	Phe313Ser,Ser258Leu
MP2456	2018-01-07	na	na	DB-0145B	region10	Cluster1	no	R561H.wt.mix	Lys76Thr	CVIET	Ala220Ser,Gln271Glu,Asn326Ser,Ile356Thr,Arg371Ile	Phe313Ser,Ser258Leu
MP2497	2018-01-09	na	na	DP-0227A	region15	Cluster1	no	R561H	Lys76Thr	CVIET	Ala220Ser,Gln271Glu,Asn326Ser,Ile356Thr,Arg371Ile	Phe313Ser,Ser258Leu
MP2691	2018-01-10	na	na	KN-0217A	region15	Cluster1	no	R561H	Lys76Thr	CVIET	Ala220Ser,Gln271Glu,Asn326Ser,Ile356Thr,Arg371Ile	Phe313Ser,Ser258Leu
MP2478	2018-01-11	na	na	ML-0458A	region38	Cluster1	no	R561H	Lys76Thr	CVIET	Ala220Ser,Gln271Glu,Asn326Ser,Ile356Thr,Arg371Ile	Phe313Ser,Ser258Leu
MP2610	2018-01-11	na	na	MW-0176	region12	Cluster1	no	R561H	Lys76Thr	CVIET	Ala220Ser,Gln271Glu,Asn326Ser,Ile356Thr,Arg371Ile	Phe313Ser,Ser258Leu
MP2451	2018-01-12	na	na	KB-0148	region10	Cluster1	no	R561H	Lys76Thr	CVIET	Ala220Ser,Gln271Glu,Asn326Ser,Ile356Thr,Arg371Ile	Phe313Ser,Ser258Leu
MP2554	2018-01-15	na	na	KH-0213A	region15	Cluster1	no	R561H	Lys76Thr	CVIET	Ala220Ser,Gln271Glu,Asn326Ser,Ile356Thr,Arg371Ile	Phe313Ser,Ser258Leu
MP2536	2018-01-16	na	na	MW-0176	region12	Cluster1	no	R561H	Lys76Thr	CVIET	Ala220Ser,Gln271Glu,Asn326Ser,Ile356Thr,Arg371Ile	Phe313Ser,Ser258Leu
MP2703	2018-01-17	na	na	HK-0208A	region12	Cluster1	no	R561H	Lys76Thr	CVIET	Ala220Ser,Gln271Glu,Asn326Ser,Ile356Thr,Arg371Ile	Phe313Ser,Ser258Leu
MP2534	2018-01-19	na	na	KL-0908	region42	Cluster1	no	R561H	Lys76Thr	CVIET	Ala220Ser,Gln271Glu,Asn326Ser,Ile356Thr,Arg371Ile	Phe313Ser,Ser258Leu
MP2693	2018-01-19	na	na	HK-0208A	region12	Cluster1	no	R561H	Lys76Thr	CVIET	Ala220Ser,Gln271Glu,Asn326Ser,Ile356Thr,Arg371Ile	Phe313Ser,Ser258Leu
MP3010	2018-01-22	na	na	TK-183A	region12	Cluster1	no	R561H	Lys76Thr	CVIET	Ala220Ser,Gln271Glu,Asn326Ser,Ile356Thr,Arg371Ile	Phe313Ser,Ser258Leu
MP3000	2018-01-23	na	na	HK-0208A	region12	Cluster1	no	R561H	Lys76Thr	CVIET	Ala220Ser,Gln271Glu,Asn326Ser,Ile356Thr,Arg371Ile	Phe313Ser,Ser258Leu
MP3032	2018-01-25	na	na	KN-0217A	region15	Cluster1	no	R561H	Lys76Thr	CVIET	Ala220Ser,Gln271Glu,Asn326Ser,Ile356Thr,Arg371Ile	Phe313Ser,Ser258Leu
MP3003	2018-01-26	na	na	TK-183A	region12	Cluster1	no	R561H	Lys76Thr	CVIET	Ala220Ser,Gln271Glu,Asn326Ser,Ile356Thr,Arg371Ile	Phe313Ser,Ser258Leu
MP2870	2018-01-29	2016-09-12	after	KN-0388A	region16	Cluster1	no	R561H	Lys76Thr	CVIET	Asn326Ser,Ile356Thr,Arg371Ile	Phe313Ser,Ser258Leu
MP2759	2018-02-02	na	na	KN-0217A	region15	Cluster1	no	R561H	Lys76Thr	CVIET	Ala220Ser,Gln271Glu,Asn326Ser,Ile356Thr,Arg371Ile	Phe313Ser,Ser258Leu
MP2767	2018-02-03	na	na	TT-232A	region15	Cluster1	no	R561H	Lys76Thr	CVIET	Ala220Ser,Gln271Glu,Asn326Ser,Ile356Thr,Arg371Ile	Phe313Ser,Ser258Leu
MP3012	2018-02-05	na	na	HB-0211	region18	Cluster1	no	R561H	Lys76Thr	CVIET	Ala220Ser,Gln271Glu,Asn326Ser,Ile356Thr,Arg371Ile	Phe313Ser,Ser258Leu
MP2760	2018-02-07	na	na	DP-0227A	region15	Cluster1	no	R561H	Lys76Thr	CVIET	Ala220Ser,Gln271Glu,Asn326Ser,Ile356Thr,Arg371Ile	Phe313Ser,Ser258Leu
MP2782	2018-02-07	na	na	HL-0221A	region15	Cluster1	no	R561H	Lys76Thr	CVIET	Ala220Ser,Gln271Glu,Asn326Ser,Ile356Thr,Arg371Ile	Phe313Ser,Ser258Leu
MP3023	2018-02-12	na	na	KH-0213A	region15	Cluster1	no	R561H	Lys76Thr	CVIET	Ala220Ser,Gln271Glu,Asn326Ser,Ile356Thr,Arg371Ile	Phe313Ser,Ser258Leu
MP3017	2018-02-13	na	na	TG-250A	region15	Cluster1	no	R561H	Lys76Thr	CVIET	Ala220Ser,Gln271Glu,Asn326Ser,Ile356Thr,Arg371Ile	Ser258Leu
MP3025	2018-02-14	na	na	HK-0208A	region12	Cluster1	no	R561H	Lys76Thr	CVIET	Ala220Ser,Gln271Glu,Asn326Ser,Ile356Thr,Arg371Ile	Phe313Ser,Ser258Leu
MP2881	2018-02-18	na	na	LW-0169	region12	Cluster1	no	R561H.wt.mix	Lys76Thr	CVIET	Asn326Ser,Ile356Thr,Arg371Ile	Phe313Ser
MP3031	2018-02-19	na	na	KN-0217A	region15	Cluster1	no	R561H	Lys76Thr	CVIET	Ala220Ser,Gln271Glu,Asn326Ser,Ile356Thr,Arg371Ile	Phe313Ser,Ser258Leu
MP3026	2018-02-21	na	na	DB-0239A	region15	Cluster1	no	R561H	Lys76Thr	CVIET	Ala220Ser,Gln271Glu,Asn326Ser,Ile356Thr,Arg371Ile	Phe313Ser,Ser258Leu
MP3055	2018-02-27	na	na	BT-0353B	region28	Cluster1	no	R561H	Lys76Thr	CVIET	Ala220Ser,Gln271Glu,Asn326Ser,Ile356Thr,Arg371Ile	Phe313Ser,Ser258Leu
MP3004	2018-02-28	2016-03-13	after	MT-193A	region12	Cluster1	no	R561H	Lys76Thr	CVIET	Ala220Ser,Gln271Glu,Asn326Ser,Ile356Thr,Arg371Ile	Phe313Ser,Ser258Leu
MP3030	2018-02-28	na	na	KH-0213A	region15	Cluster1	no	R561H	Lys76Thr	CVIET	Ala220Ser,Gln271Glu,Asn326Ser,Ile356Thr,Arg371Ile	Phe313Ser,Ser258Leu
MP3158	2018-03-05	2016-03-13	after	MT-193A	region12	Cluster1	no	R561H	Lys76Thr	CVIET	Ala220Ser,Gln271Glu,Asn326Ser,Ile356Thr,Arg371Ile	Phe313Ser,Ser258Leu
MP3232	2018-03-23	na	na	LK-0152	region7	Cluster1	no	R561H	Lys76Thr	CVIET	Ala220Ser,Gln271Glu,Asn326Ser,Ile356Thr,Arg371Ile	Phe313Ser,Ser258Leu
MP3049	2018-03-27	2017-06-30	after	MK-363C	region30	Cluster1	no	R561H	Lys76Thr	CVIET	Ala220Ser,Gln271Glu,Asn326Ser,Ile356Thr,Arg371Ile	Phe313Ser,Ser258Leu
MP4702	2018-04-04	2016-03-13	after	MT-193A	region12	Cluster1	no	R561H	Lys76Thr	CVIET	Ala220Ser,Gln271Glu,Asn326Ser,Ile356Thr,Arg371Ile	Phe313Ser,Ser258Leu
MP3085	2018-04-09	na	na	TK-155B	region9	Cluster1	no	R561H	Lys76Thr	CVIET	Ala220Ser,Gln271Glu,Asn326Ser,Ile356Thr,Arg371Ile	Phe313Ser,Ser258Leu
MP3321	2018-04-18	na	na	TK-183A	region12	Cluster1	no	R561H	Lys76Thr	CVIET	Ala220Ser,Gln271Glu,Asn326Ser,Ile356Thr,Arg371Ile	Phe313Ser,Ser258Leu
MP3343	2018-04-23	na	na	KH-0213A	region15	Cluster1	no	R561H	Lys76Thr	CVIET	Ala220Ser,Gln271Glu,Asn326Ser,Ile356Thr,Arg371Ile	Phe313Ser,Ser258Leu
MP3381	2018-04-23	na	na	KO-0204A	region12	Cluster1	no	R561H	Lys76Thr	CVIET	Ala220Ser,Gln271Glu,Asn326Ser,Ile356Thr,Arg371Ile	Phe313Ser,Ser258Leu
MP3385	2018-05-12	na	na	TK-183A	region12	Cluster1	no	R561H	Lys76Thr	CVIET	Ala220Ser,Gln271Glu,Asn326Ser,Ile356Thr,Arg371Ile	Phe313Ser,Ser258Leu
MP3625	2018-05-21	na	na	TK-183A	region12	Cluster1	no	R561H	na	na		Phe313Ser
MP3680	2018-05-21	na	na	LP-214A	region12	Cluster1	no	R561H	Lys76Thr	CVIET	Ala220Ser,Gln271Glu,Asn326Ser,Ile356Thr,Arg371Ile	Phe313Ser,Ser258Leu
MP3720	2018-05-22	na	na	TK-183A	region12	Cluster1	no	R561H	Lys76Thr	CVIET	Ala220Ser,Gln271Glu,Asn326Ser,Ile356Thr,Arg371Ile	Phe313Ser,Ser258Leu
MP3698	2018-05-30	na	na	TK-183A	region12	Cluster1	no	R561H	Lys76Thr	CVIET	Ala220Ser,Gln271Glu,Asn326Ser,Ile356Thr,Arg371Ile	Phe313Ser,Ser258Leu
MP3661	2018-05-31	na	na	DL-0187B	region12	Cluster1	no	R561H	Lys76Thr	CVIET	Gln271Glu,Asn326Ser	Phe313Ser,Ser258Leu
MP3658	2018-06-02	na	na	PN-0196	region12	Cluster1	no	R561H	Lys76Thr	CVIET	Ala220Ser,Gln271Glu,Asn326Ser	Phe313Ser,Ser258Leu
MP3677	2018-06-04	na	na	KO-0204A	region12	Cluster1	no	R561H	Lys76Thr	CVIET	Ala220Ser,Gln271Glu,Arg371Ile	Phe313Ser,Ser258Leu
MP3689	2018-06-04	na	na	TK-183A	region12	Cluster1	no	R561H.wt.mix	Lys76Thr	CVIET	Ala220Ser,Ile356Thr,Arg371Ile	Phe313Ser,Ser258Leu
MP3498	2018-06-09	na	na	TO-11005	region6	Cluster1	no	R561H	Lys76Thr	CVIET	Ala220Ser,Asn326Ser,Ile356Thr,Arg371Ile	Phe313Ser,Ser258Leu
MP3654	2018-06-11	na	na	KH-0213A	region15	Cluster1	no	R561H	Lys76Thr	CVIET	Ala220Ser,Gln271Glu,Asn326Ser,Ile356Thr,Arg371Ile	Phe313Ser,Ser258Leu
MP4081	2018-06-18	na	na	PK-0159	region10	Cluster1	no	R561H	Lys76Thr	CVIET	Ala220Ser,Gln271Glu,Asn326Ser,Ile356Thr,Arg371Ile	Phe313Ser,Ser258Leu
MP4088	2018-06-18	na	na	NH-0402A	region24	Cluster1	no	R561H	Lys76Thr	CVIET	Ala220Ser,Gln271Glu,Asn326Ser,Ile356Thr,Arg371Ile	Phe313Ser,Ser258Leu
MP4090	2018-06-18	na	na	PS-0149	region10	Cluster1	no	R561H	Lys76Thr	CVIET	Ala220Ser,Gln271Glu,Asn326Ser,Ile356Thr,Arg371Ile	Phe313Ser,Ser258Leu
MP4077	2018-06-19	na	na	LN-163B	region10	Cluster1	no	R561H	Lys76Thr	CVIET	Ala220Ser,Gln271Glu,Asn326Ser,Ile356Thr,Arg371Ile	Phe313Ser,Ser258Leu
MP4078	2018-06-19	na	na	MY-11074	region10	Cluster1	no	R561H	na	na		Phe313Ser,Ser258Leu
MP3944	2018-06-21	na	na	HK-0208A	region12	Cluster1	no	R561H	Lys76Thr	CVIET	Ala220Ser,Gln271Glu,Asn326Ser,Ile356Thr,Arg371Ile	Phe313Ser,Ser258Leu
MP4083	2018-06-27	na	na	HK-0208A	region12	Cluster1	no	R561H	Lys76Thr	CVIET	Gln271Glu,Arg371Ile	Phe313Ser,Ser258Leu
MP4075	2018-07-04	na	na	PS-0149	region10	Cluster1	no	R561H	Lys76Thr	CVIET	Ala220Ser,Gln271Glu,Asn326Ser,Ile356Thr,Arg371Ile	Phe313Ser,Ser258Leu
MP4086	2018-07-07	na	na	MY-11074	region10	Cluster1	no	R561H	Lys76Thr	CVIET	Ala220Ser,Gln271Glu,Asn326Ser,Ile356Thr,Arg371Ile	Phe313Ser,Ser258Leu
MP3924	2018-07-18	na	na	DB-0145B	region10	Cluster1	no	R561H	na	na	Ala220Ser,Gln271Glu,Ile356Thr,Arg371Ile	Phe313Ser,Ser258Leu
MP3810	2018-07-20	na	na	KL-0908	region42	Cluster1	no	R561H	Lys76Thr	CVIET	Ala220Ser,Gln271Glu,Asn326Ser,Ile356Thr,Arg371Ile	Phe313Ser,Ser258Leu
MP3785	2018-07-30	na	na	HL-0221A	region15	Cluster1	no	R561H	Lys76Thr	CVIET	Ala220Ser,Gln271Glu,Asn326Ser,Ile356Thr,Arg371Ile	Phe313Ser,Ser258Leu
MP3834	2018-08-02	na	na	LN-163B	region10	Cluster1	no	R561H	Lys76Thr	CVIET	Ala220Ser,Gln271Glu,Asn326Ser,Ile356Thr,Arg371Ile	Phe313Ser,Ser258Leu
MP3780	2018-08-08	na	na	TK-155B	region9	Cluster1	no	R561H	Lys76Thr	CVIET	Ala220Ser,Gln271Glu,Asn326Ser,Ile356Thr,Arg371Ile	Phe313Ser,Ser258Leu
MP3814	2018-08-22	na	na	MW-0176	region12	Cluster1	no	R561H	Lys76Thr	CVIET	Ala220Ser,Gln271Glu,Asn326Ser,Ile356Thr,Arg371Ile	Phe313Ser,Ser258Leu
MP4118	2018-09-27	na	na	KT-0118A	region5	Cluster1	no	R561H	na	na		Phe313Ser,Ser258Leu
MP4132	2018-10-08	na	na	DB-0145B	region10	Cluster1	no	R561H	Lys76Thr	CVIET	Ala220Ser,Gln271Glu,Asn326Ser,Ile356Thr,Arg371Ile	Phe313Ser,Ser258Leu
MP4181	2018-10-22	na	na	KO-0204A	region12	Cluster1	no	R561H	Lys76Thr	CVIET	Ala220Ser,Gln271Glu,Asn326Ser,Arg371Ile	Phe313Ser,Ser258Leu
MP4184	2018-10-23	na	na	KN-0217A	region15	Cluster1	no	R561H.wt.mix	Lys76Thr	CVIET	Ala220Ser,Gln271Glu,Asn326Ser,Ile356Thr,Arg371Ile	Phe313Ser,Ser258Leu
MP4166	2018-11-06	na	na	KM-0121	region7	Cluster1	no	R561H	Lys76Thr	CVIET	Ala220Ser,Asn326Ser,Arg371Ile	Phe313Ser,Ser258Leu
MP4201	2018-11-11	na	na	TK-155B	region9	Cluster1	no	R561H	Lys76Thr	CVIET	Ala220Ser,Gln271Glu,Asn326Ser,Ile356Thr,Arg371Ile	Phe313Ser,Ser258Leu
MP4169	2018-11-12	na	na	DB-0145B	region10	Cluster1	no	R561H	Lys76Thr	CVIET	Ala220Ser,Gln271Glu,Asn326Ser,Ile356Thr,Arg371Ile	Phe313Ser,Ser258Leu
MP4281	2018-11-12	na	na	KH-0213A	region15	Cluster1	no	R561H	Lys76Thr	CVIET	Ala220Ser,Gln271Glu,Asn326Ser,Ile356Thr,Arg371Ile	Phe313Ser,Ser258Leu
MP4161	2018-11-15	na	na	TK-155B	region9	Cluster1	no	R561H	Lys76Thr	CVIET	Ala220Ser,Gln271Glu,Asn326Ser,Arg371Ile	Phe313Ser,Ser258Leu
MP4358	2018-11-16	2016-03-13	after	MT-193A	region12	Cluster1	no	R561H	Lys76Thr	CVIET	Ala220Ser,Gln271Glu,Asn326Ser,Ile356Thr,Arg371Ile	Phe313Ser,Ser258Leu
MP4343	2018-11-20	2015-09-12	after	LN-0163A	region10	Cluster1	no	R561H	Lys76Thr	CVIET	Ala220Ser,Gln271Glu,Asn326Ser,Ile356Thr,Arg371Ile	Phe313Ser,Ser258Leu
MP4185	2018-11-21	na	na	LN-163B	region10	Cluster1	no	R561H	Lys76Thr	CVIET	Ala220Ser,Gln271Glu,Asn326Ser,Ile356Thr,Arg371Ile	Phe313Ser,Ser258Leu
MP4400	2018-11-24	na	na	PK-0159	region10	Cluster1	no	R561H	Lys76Thr	CVIET	Ala220Ser,Gln271Glu,Asn326Ser,Ile356Thr,Arg371Ile	Phe313Ser,Ser258Leu
MP4250	2018-11-26	na	na	PK-0159	region10	Cluster1	no	R561H	Lys76Thr	CVIET	Ala220Ser,Gln271Glu,Asn326Ser,Ile356Thr,Arg371Ile	Phe313Ser,Ser258Leu
MP4360	2018-12-03	na	na	TK-155B	region9	Cluster1	YES-2018	R561H	Lys76Thr	CVIET	Ala220Ser,Gln271Glu,Asn326Ser,Ile356Thr,Arg371Ile	Phe313Ser,Ser258Leu
MP4387	2018-12-03	na	na	TK-155B	region9	Cluster1	no	R561H	Lys76Thr	CVIET	Ala220Ser,Gln271Glu,Asn326Ser,Ile356Thr,Arg371Ile	Phe313Ser,Ser258Leu
MP4382	2018-12-04	na	na	DB-0145B	region10	Cluster1	no	R561H	Lys76Thr	CVIET	Ala220Ser,Gln271Glu,Asn326Ser,Ile356Thr,Arg371Ile	Phe313Ser,Ser258Leu
MP4299	2018-12-12	2015-02-11	after	HM-0292	region32	Cluster1	no	R561H	Lys76Thr	CVIET	Ala220Ser,Gln271Glu,Ile356Thr,Arg371Ile	Lys541Asn,Phe313Ser
MP4371	2018-12-13	na	na	KW-11056A	region14	Cluster1	no	R561H	Lys76Thr	CVIET	Ala220Ser,Gln271Glu,Asn326Ser,Arg371Ile	Phe313Ser,Ser258Leu
MP4348	2018-12-17	na	na	KB-0148	region10	Cluster1	no	R561H	Lys76Thr	CVIET	Ala220Ser,Gln271Glu	Phe313Ser
METF.HRP.20	2018-12-18	na	na	MK-363E	region30	Cluster1	no	R561H	Lys76Thr	CVIET	Ala220Ser,Gln271Glu,Asn326Ser,Ile356Thr,Arg371Ile	Lys541Asn,Phe313Ser
METF.HRP.43	2018-12-18	na	na	TP-0339	region33	Cluster1	no	R561H	Lys76Thr	CVIET	Ala220Ser,Gln271Glu,Asn326Ser,Ile356Thr,Arg371Ile	Lys541Asn,Phe313Ser
MP4287	2018-12-24	na	na	TK-155B	region9	Cluster1	no	R561H	na	na	Ala220Ser,Gln271Glu,Asn326Ser,Ile356Thr	Phe313Ser,Ser258Leu
MP4295	2018-12-25	na	na	HK-11015	region20	Cluster1	no	R561H	Lys76Thr	CVIET	Ala220Ser,Gln271Glu,Ile356Thr,Arg371Ile	Phe313Ser,Ser258Leu
MP4218	2019-01-01	na	na	LN-163B	region10	Cluster1	no	R561H	Lys76Thr	CVIET	Ala220Ser,Gln271Glu,Asn326Ser,Ile356Thr,Arg371Ile	Phe313Ser,Ser258Leu
MP4339	2019-01-04	2015-02-05	after	CB-0194	region18	Cluster1	no	R561H.wt.mix	Lys76Thr	CVIET	Ala220Ser,Arg371Ile	Phe313Ser,Ser258Leu
MP4291	2019-01-18	na	na	HK-11015	region20	Cluster1	no	R561H.wt.mix	Lys76Thr	CVIET	Ala220Ser,Gln271Glu,Arg371Ile	Phe313Ser,Ser258Leu
MP4213	2019-01-25	na	na	TK-155B	region9	Cluster1	no	R561H	Lys76Thr	CVIET	Ala220Ser,Gln271Glu,Asn326Ser,Ile356Thr,Arg371Ile	Phe313Ser,Ser258Leu
MP4454	2019-02-10	na	na	MY-11074	region10	Cluster1	no	R561H	Lys76Thr	CVIET	Ala220Ser,Gln271Glu,Asn326Ser,Arg371Ile	Phe313Ser,Ser258Leu
MP4433	2019-02-14	na	na	TK-155B	region9	Cluster1	no	R561H	Lys76Thr	CVIET	Ala220Ser,Gln271Glu,Asn326Ser,Ile356Thr,Arg371Ile	Phe313Ser,Ser258Leu
MP4576	2019-06-10	na	na	TK-183A	region12	Cluster1	no	R561H	Lys76Thr	CVIET	Ala220Ser,Gln271Glu,Asn326Ser,Ile356Thr,Arg371Ile	Phe313Ser,Ser258Leu
MP4579	2019-06-15	na	na	TK-183A	region12	Cluster1	no	R561H	Lys76Thr	CVIET	Ala220Ser,Gln271Glu,Asn326Ser,Ile356Thr,Arg371Ile	Phe313Ser,Ser258Leu
MP4671	2019-06-15	na	na	TK-183A	region12	Cluster1	no	R561H	Lys76Thr	CVIET	Ala220Ser,Gln271Glu,Asn326Ser,Ile356Thr,Arg371Ile	Phe313Ser,Ser258Leu
MP4615	2019-06-16	na	na	TK-183A	region12	Cluster1	no	R561H	Lys76Thr	CVIET	Ala220Ser,Gln271Glu,Asn326Ser,Ile356Thr,Arg371Ile	Phe313Ser,Ser258Leu
MP4564	2019-06-20	na	na	MY-11074	region10	Cluster1	no	R561H	Lys76Thr	CVIET	Ala220Ser,Arg371Ile	Phe313Ser,Ser258Leu
MP4759	2019-10-28	na	na	DB-0239A	region15	Cluster1	YES-2019	R561H	Lys76Thr	CVIET	Ala220Ser,Gln271Glu,Asn326Ser,Ile356Thr,Arg371Ile	Phe313Ser,Ser258Leu
MP4830	2019-11-25	2015-02-18	after	KT-0219	region27	Cluster1	no	R561H	Lys76Thr	CVIET	Ala220Ser,Gln271Glu,Asn326Ser,Ile356Thr,Arg371Ile	Phe313Ser,Ser258Leu
MP4846	2019-11-25	2015-02-18	after	KT-0219	region27	Cluster1	no	R561H	Lys76Thr	CVIET	Ala220Ser,Gln271Glu,Asn326Ser,Ile356Thr,Arg371Ile	Phe313Ser,Ser258Leu
MP4761	2019-12-17	na	na	ET-0182D	region20	Cluster1	no	R561H	Lys76Thr	CVIET	Ala220Ser,Gln271Glu,Asn326Ser,Ile356Thr,Arg371Ile	Phe313Ser,Ser258Leu
MP4762	2019-12-24	na	na	DB-0239A	region15	Cluster1	no	R561H	Lys76Thr	CVIET	Ala220Ser,Asn326Ser	Phe313Ser,Ser258Leu
MP4826	2020-04-29	na	na	NG-0359A	region28	Cluster1	no	R561H	Lys76Thr	CVIET	Ala220Ser,Gln271Glu,Asn326Ser,Ile356Thr,Arg371Ile	Phe313Ser,Ser258Leu
MP4822	2020-04-30	2020-05-02	before	LH-0266B	region13	Cluster1	no	R561H	na	na		Phe313Ser,Ser258Leu
MP4833	2020-05-18	na	na	TK-183A	region12	Cluster1	YES-2020	R561H	Lys76Thr	CVIET	Ala220Ser,Gln271Glu,Asn326Ser,Ile356Thr,Arg371Ile	Phe313Ser,Ser258Leu
MP4842	2020-05-25	2020-05-02	after	LH-0266B	region13	Cluster1	no	R561H	Lys76Thr	CVIET	Ala220Ser,Gln271Glu,Asn326Ser,Ile356Thr,Arg371Ile	Phe313Ser,Ser258Leu
MP4835	2020-05-26	2020-05-02	after	LH-0266B	region13	Cluster1	no	R561H	Lys76Thr	CVIET	Ala220Ser,Gln271Glu,Asn326Ser,Ile356Thr,Arg371Ile	Phe313Ser,Ser258Leu
MP4847	2020-05-29	2020-05-02	after	LH-0266B	region13	Cluster1	no	R561H	Lys76Thr	CVIET	Ala220Ser,Gln271Glu,Arg371Ile	Phe313Ser,Ser258Leu
MP4860	2020-06-01	2020-05-02	after	LH-0266B	region13	Cluster1	no	R561H	Lys76Thr	CVIET	Ala220Ser,Gln271Glu,Asn326Ser,Ile356Thr,Arg371Ile	Phe313Ser,Ser258Leu
MP4926	2020-06-01	na	na	HK-0277A	region17	Cluster1	no	R561H.wt.mix	Lys76Thr	CVIET	Ala220Ser,Gln271Glu,Asn326Ser,Ile356Thr,Arg371Ile	Phe313Ser,Ser258Leu
MP4856	2020-06-03	2020-05-02	after	LH-0266B	region13	Cluster1	no	R561H	Lys76Thr	CVIET	Ala220Ser,Gln271Glu,Asn326Ser,Ile356Thr,Arg371Ile	Phe313Ser,Ser258Leu
MP4864	2020-06-03	2020-05-02	after	LH-0266B	region13	Cluster1	no	R561H	Lys76Thr	CVIET	Ala220Ser,Gln271Glu,Asn326Ser,Ile356Thr,Arg371Ile	Phe313Ser,Ser258Leu
MP4849	2020-06-04	2020-05-02	after	LH-0266B	region13	Cluster1	no	R561H.wt.mix	Lys76Thr	CVIET	Ala220Ser,Gln271Glu,Asn326Ser,Ile356Thr,Arg371Ile	Phe313Ser,Ser258Leu
MP4854	2020-06-04	2020-05-02	after	LH-0266B	region13	Cluster1	no	R561H	Lys76Thr	CVIET	Ala220Ser,Gln271Glu,Asn326Ser,Ile356Thr,	Phe313Ser,Ser258Leu
MP4873	2020-06-04	2020-05-02	after	LH-0266B	region13	Cluster1	no	R561H	Lys76Thr	CVIET	Ala220Ser,Gln271Glu,Asn326Ser,Ile356Thr,Arg371Ile	Phe313Ser,Ser258Leu
MP4877	2020-06-04	2020-05-02	after	LH-0266B	region13	Cluster1	no	R561H	Lys76Thr	CVIET	Ile356Thr	Phe313Ser,Ser258Leu
MP4863	2020-06-05	2020-05-02	after	LH-0266B	region13	Cluster1	no	R561H	Lys76Thr	CVIET	Ala220Ser,Gln271Glu,Asn326Ser,Ile356Thr,Arg371Ile	Phe313Ser,Ser258Leu
MP4867	2020-06-05	2020-05-02	after	LH-0266B	region13	Cluster1	no	R561H	Lys76Thr	CVIET	Ala220Ser,Gln271Glu,Ile356Thr	Phe313Ser,Ser258Leu
MP4874	2020-06-05	2020-05-02	after	LH-0266B	region13	Cluster1	no	R561H	Lys76Thr	CVIET	Ala220Ser	Phe313Ser,Ser258Leu
MP4907	2020-06-05	2020-05-02	after	LH-0266B	region13	Cluster1	no	R561H	Lys76Thr	CVIET	Ala220Ser,Gln271Glu,Asn326Ser,Ile356Thr,Arg371Ile	Phe313Ser,Ser258Leu
MP4910	2020-06-05	2020-05-02	after	LH-0266B	region13	Cluster1	no	R561H	Lys76Thr	CVIET	Ala220Ser,Asn326Ser,Ile356Thr	Phe313Ser,Ser258Leu
MP4914	2020-06-06	2020-05-02	after	LH-0266B	region13	Cluster1	no	R561H.wt.mix	Lys76Thr	CVIET	Ala220Ser,Asn326Ser,Cys350Tyr,Ile356Thr,Arg371Ile	Phe313Ser,Ser258Leu
MP4887	2020-06-08	2020-05-02	after	LH-0266B	region13	Cluster1	no	R561H	Lys76Thr	CVIET	Ala220Ser,Gln271Glu,Asn326Ser,Ile356Thr,Arg371Ile	Phe313Ser,Ser258Leu
MP4889	2020-06-08	2020-05-02	after	LH-0266B	region13	Cluster1	no	R561H	Lys76Thr	CVIET	Ala220Ser	Phe313Ser,Ser258Leu
MP4897	2020-06-08	2020-05-02	after	LH-0266B	region13	Cluster1	no	R561H	na	na	Ala220Ser,Asn326Ser,Arg371Ile	Phe313Ser,Ser258Leu
MP4898	2020-06-08	2020-05-02	after	LH-0266B	region13	Cluster1	no	R561H	Lys76Thr	CVIET	Ala220Ser,Gln271Glu,Asn326Ser,Ile356Thr,Arg371Ile	Phe313Ser,Ser258Leu
MP4870	2020-06-09	2020-05-02	after	LH-0266B	region13	Cluster1	no	R561H.wt.mix	Lys76Thr	CVIET	Ala220Ser,Gln271Glu,Asn326Ser,Ile356Thr,Arg371Ile	Phe313Ser,Ser258Leu
MP4880	2020-06-10	2020-05-02	after	LH-0266B	region13	Cluster1	no	R561H	Lys76Thr	CVIET	Ala220Ser,Gln271Glu,Asn326Ser,Ile356Thr,Arg371Ile	Phe313Ser,Ser258Leu
MP4958	2020-06-10	2020-05-02	after	LH-0266B	region13	Cluster1	no	R561H	Lys76Thr	CVIET	Ala220Ser,Gln271Glu,Asn326Ser,Ile356Thr,Arg371Ile	Phe313Ser,Ser258Leu
MP4960	2020-06-10	2020-05-02	after	LH-0266B	region13	Cluster1	no	R561H	Lys76Thr	CVIET	Ala220Ser,Gln271Glu,Asn326Ser,Ile356Thr,Arg371Ile	Phe313Ser,Ser258Leu
MP4963	2020-06-10	2020-05-02	after	LH-0266B	region13	Cluster1	no	R561H	Lys76Thr	CVIET	Ala220Ser,Gln271Glu,Asn326Ser,Ile356Thr,Arg371Ile	Phe313Ser,Ser258Leu
MP4878	2020-06-11	2020-05-02	after	LH-0266B	region13	Cluster1	no	R561H	Lys76Thr	CVIET	Ala220Ser,Gln271Glu,Asn326Ser,Ile356Thr,Arg371Ile	Phe313Ser,Ser258Leu
MP4890	2020-06-11	2020-05-02	after	LH-0266B	region13	Cluster1	no	R561H	Lys76Thr	CVIET	Ala220Ser,Gln271Glu,Asn326Ser,Ile356Thr	Phe313Ser,Ser258Leu
MP4942	2020-06-11	na	na	MY-11074	region10	Cluster1	no	R561H	Lys76Thr	CVIET	Ala220Ser,Gln271Glu,Asn326Ser,Ile356Thr,Arg371Ile	Phe313Ser,Ser258Leu
MP4886	2020-06-13	2020-05-02	after	LH-0266B	region13	Cluster1	no	R561H	Lys76Thr	CVIET	Ala220Ser,Gln271Glu,Asn326Ser,Ile356Thr,Arg371Ile	Phe313Ser,Ser258Leu
MP4964	2020-06-14	2020-05-02	after	LH-0266B	region13	Cluster1	no	R561H	Lys76Thr	CVIET	Ala220Ser,Gln271Glu,Asn326Ser,Ile356Thr,Arg371Ile	Phe313Ser,Ser258Leu
MP4971	2020-06-14	2020-05-02	after	LH-0266B	region13	Cluster1	no	R561H	Lys76Thr	CVIET	Ala220Ser,Gln271Glu,Asn326Ser,Ile356Thr,Arg371Ile	Phe313Ser,Ser258Leu
MP4973	2020-06-14	2020-05-02	after	LH-0266B	region13	Cluster1	no	R561H	Lys76Thr	CVIET	Ala220Ser,Gln271Glu,Asn326Ser,Ile356Thr,Arg371Ile	Phe313Ser,Ser258Leu
MP4974	2020-06-14	2020-05-02	after	LH-0266B	region13	Cluster1	no	R561H	Lys76Thr	CVIET	Ala220Ser,Gln271Glu,Asn326Ser,Ile356Thr,Arg371Ile	Phe313Ser,Ser258Leu
MP4975	2020-06-14	2020-05-02	after	LH-0266B	region13	Cluster1	no	R561H	Lys76Thr	CVIET	Ala220Ser,Gln271Glu,Asn326Ser,Ile356Thr,Arg371Ile	Phe313Ser,Ser258Leu
MP4903	2020-06-15	2020-05-02	after	LH-0266B	region13	Cluster1	no	R561H	Lys76Thr	CVIET	Ala220Ser,Gln271Glu,Asn326Ser,Ile356Thr,Arg371Ile	Phe313Ser,Ser258Leu
MP4976	2020-06-15	2020-05-02	after	LH-0266B	region13	Cluster1	no	R561H.wt.mix	Lys76Thr	CVIET	Ala220Ser,Gln271Glu,Asn326Ser,Ile356Thr,Arg371Ile	Phe313Ser,Ser258Leu
MP4941	2020-06-16	na	na	PL-0379	region34	Cluster1	no	R561H	Lys76Thr	CVIET	Ala220Ser,Gln271Glu,Asn326Ser,Ile356Thr,Arg371Ile	Phe313Ser,Ser258Leu
MP4924	2020-06-17	na	na	KK-0254A	region13	Cluster1	no	R561H	Lys76Thr	CVIET	Ala220Ser,Gln271Glu,Asn326Ser,Ile356Thr,Arg371Ile	Phe313Ser,Ser258Leu
MP4980	2020-06-23	2020-05-02	after	LH-0266B	region13	Cluster1	no	R561H	Lys76Thr	CVIET	Ala220Ser,Gln271Glu,Asn326Ser,Ile356Thr,Arg371Ile	Phe313Ser,Ser258Leu
MP4981	2020-06-30	na	na	MN-12230	region36	Cluster1	no	R561H	Lys76Thr	CVIET	Ala220Ser,Gln271Glu,Asn326Ser,Ile356Thr,Arg371Ile	Phe313Ser,Ser258Leu
MP4988	2020-07-09	2020-05-02	after	LH-0266B	region13	Cluster1	no	R561H	Lys76Thr	CVIET	Ala220Ser,Gln271Glu,Asn326Ser,Ile356Thr,Arg371Ile	Phe313Ser,Ser258Leu
MP4989	2020-07-09	2016-09-02	after	MG-0261A	region11	Cluster1	no	R561H	Lys76Thr	CVIET	Ala220Ser,Gln271Glu,Asn326Ser,Ile356Thr,Arg371Ile	Phe313Ser,Ser258Leu
MP4990	2020-07-09	2020-05-02	after	LH-0266B	region13	Cluster1	no	R561H	Lys76Thr	CVIET	Ala220Ser,Gln271Glu,Asn326Ser,Ile356Thr,Arg371Ile	Phe313Ser,Ser258Leu
MP4991	2020-07-09	2020-05-02	after	LH-0266B	region13	Cluster1	no	R561H	Lys76Thr	CVIET	Ala220Ser,Gln271Glu,Asn326Ser,Ile356Thr,Arg371Ile	Phe313Ser,Ser258Leu
MP4992	2020-07-09	na	na	KK-0254A	region13	Cluster1	no	R561H	Lys76Thr	CVIET	Ala220Ser,Gln271Glu,Asn326Ser,Ile356Thr,Arg371Ile	Phe313Ser,Ser258Leu
MP4998	2020-07-15	na	na	MG-0261B	region11	Cluster1	no	R561H	Lys76Thr	CVIET	Ala220Ser,Gln271Glu,Asn326Ser,Ile356Thr,Arg371Ile	Phe313Ser,Ser258Leu
MP4999	2020-07-20	na	na	PL-0041	region1	Cluster1	no	R561H	Lys76Thr	CVIET	Ala220Ser,Gln271Glu,Asn326Ser,Ile356Thr,Arg371Ile	Phe313Ser,Ser258Leu
MP5000	2020-07-20	na	na	KK-11802	region20	Cluster1	no	R561H.wt.mix	Lys76Thr	CVIET	Ala220Ser,Gln271Glu,Asn326Ser,Ile356Thr,Arg371Ile	Phe313Ser,Ser258Leu
MP5001	2020-07-20	na	na	MG-0261B	region11	Cluster1	no	R561H	Lys76Thr	CVIET	Ala220Ser,Gln271Glu,Asn326Ser,Ile356Thr,Arg371Ile	Phe313Ser,Ser258Leu
MP5002	2020-07-20	na	na	TG-250A	region15	Cluster1	no	R561H	Lys76Thr	CVIET	Ala220Ser,Gln271Glu,Asn326Ser,Ile356Thr,Arg371Ile	Phe313Ser,Ser258Leu
MP5005	2020-07-20	na	na	HL-0365A	region28	Cluster1	no	R561H	Lys76Thr	CVIET	Ala220Ser,Gln271Glu,Asn326Ser,Ile356Thr,Arg371Ile	Phe313Ser,Ser258Leu
MP0266	2016-02-16	2017-06-30	before	MK-363C	region30	Cluster2	no	F446I	Lys76Thr	CVIET	Ala220Ser,Gln271Glu,Asn326Ser,Ile356Thr,Arg371Ile	Lys541Asn,Phe313Ser
MP0027	2016-06-14	na	na	MN-268C	region25	Cluster2	no	F446I	Lys76Thr	CVIET	Ala220Ser,Gln271Glu,Asn326Ser,Ile356Thr,Arg371Ile	Lys541Asn,Phe313Ser
MP0185	2016-06-25	na	na	KL-0268A	region25	Cluster2	YES-2016	F446I	Lys76Thr	CVIET	Ala220Ser,Gln271Glu,Asn326Ser,Ile356Thr,Arg371Ile	Lys541Asn,Phe313Ser
MP0100	2016-06-29	na	na	HB-11007	region25	Cluster2	no	F446I	Lys76Thr	CVIET	Ala220Ser,Gln271Glu,Asn326Ser,Ile356Thr,Arg371Ile	Lys541Asn,Phe313Ser
MP0101	2016-06-29	na	na	HB-11007	region25	Cluster2	no	F446I	Lys76Thr	CVIET	Ala220Ser,Gln271Glu,Asn326Ser,Ile356Thr,Arg371Ile	Lys541Asn,Phe313Ser
MP0371	2016-09-06	na	na	TM-298C	region23	Cluster2	no	F446I	Lys76Thr	CVIET	Ala220Ser,Gln271Glu,Asn326Ser,Ile356Thr,Arg371Ile	Lys541Asn,Phe313Ser
MP0393	2016-09-13	na	na	TM-298C	region23	Cluster2	no	F446I	Lys76Thr	CVIET	Ala220Ser,Gln271Glu,Asn326Ser,Ile356Thr,Arg371Ile	Lys541Asn,Phe313Ser
MP0396	2016-09-19	na	na	TM-298C	region23	Cluster2	no	F446I	Lys76Thr	CVIET	Ala220Ser,Gln271Glu,Asn326Ser,Ile356Thr,Arg371Ile	Phe313Ser
MP0554	2016-12-27	na	na	OK-0241	region27	Cluster2	no	F446I	Lys76Thr	CVIET	Ala220Ser,Gln271Glu,Asn326Ser,Ile356Thr,Arg371Ile	Lys541Asn,Phe313Ser
MP0749	2017-01-16	na	na	NB-11054A	region19	Cluster2	no	F446I	Lys76Thr	CVIET	Asn326Ser,Ile356Thr,Arg371Ile	Lys541Asn,Phe313Ser
MP1576	2017-05-10	na	na	TM-298C	region23	Cluster2	no	F446I	Lys76Thr	CVIET	Ala220Ser,Gln271Glu,Asn326Ser,Ile356Thr,Arg371Ile	Lys541Asn,Phe313Ser
MP1175	2017-05-13	2016-03-14	after	PL-0327A	region30	Cluster2	no	F446I	Lys76Thr	CVIET	Ala220Ser,Gln271Glu,Asn326Ser,Ile356Thr,Arg371Ile	Lys541Asn,Phe313Ser
MP1135	2017-05-27	2017-07-12	before	HD-0363D	region30	Cluster2	no	F446I	Lys76Thr	CVIET	Ala220Ser,Gln271Glu,Asn326Ser,Ile356Thr,Arg371Ile	Lys541Asn
MP1277	2017-05-31	2016-03-14	after	PL-0327A	region30	Cluster2	no	F446I	Lys76Thr	CVIET	Ala220Ser,Gln271Glu,Asn326Ser,Ile356Thr,Arg371Ile	Lys541Asn,Phe313Ser
MP1355	2017-06-02	2016-03-14	after	PL-0327A	region30	Cluster2	no	F446I	Lys76Thr	CVIET	Ala220Ser,Gln271Glu,Asn326Ser,Ile356Thr,Arg371Ile	Lys541Asn,Phe313Ser
MP1295	2017-06-05	2016-03-14	after	PL-0327A	region30	Cluster2	no	F446I	Lys76Thr	CVIET	Ala220Ser,Gln271Glu,Asn326Ser,Ile356Thr,Arg371Ile	Lys541Asn,Phe313Ser
MP1554	2017-06-05	2017-06-30	before	MK-363C	region30	Cluster2	no	F446I	na	na	Ala220Ser,Gln271Glu,Ile356Thr,Arg371Ile	Lys541Asn,Phe313Ser
MP1555	2017-06-05	na	na	DB-0239A	region15	Cluster2	no	F446I	Lys76Thr	CVIET	Ala220Ser,Gln271Glu,Asn326Ser,Ile356Thr,Arg371Ile	Lys541Asn,Phe313Ser
MP1291	2017-06-07	2017-07-04	before	TM-0363F	region30	Cluster2	no	F446I	Lys76Thr	CVIET	Ala220Ser,Gln271Glu,Asn326Ser,Ile356Thr,Arg371Ile	Lys541Asn,Phe313Ser
MP1347	2017-06-07	2016-03-14	after	PL-0327A	region30	Cluster2	no	F446I	Lys76Thr	CVIET	Ala220Ser,Gln271Glu,Ile356Thr,Arg371Ile	Lys541Asn,Phe313Ser
MP1366	2017-06-08	na	na	KL-0268A	region25	Cluster2	no	F446I	Lys76Thr	CVIET	Ala220Ser	Lys541Asn,Phe313Ser
MP1290	2017-06-12	na	na	KL-0268A	region25	Cluster2	no	F446I	Lys76Thr	CVIET	Gln271Glu,Asn326Ser,Arg371Ile	Lys541Asn,Phe313Ser
MP1312	2017-06-12	2016-03-14	after	PL-0327A	region30	Cluster2	YES-2017	F446I	Lys76Thr	CVIET	Ala220Ser,Gln271Glu,Asn326Ser,Ile356Thr,Arg371Ile	Lys541Asn,Phe313Ser
MP1533	2017-06-12	2016-03-14	after	PL-0327A	region30	Cluster2	no	F446I	Lys76Thr	CVIET	Ala220Ser,Gln271Glu,Asn326Ser,Ile356Thr,Arg371Ile	Lys541Asn,Phe313Ser
MP1275	2017-06-16	2016-03-14	after	PL-0327A	region30	Cluster2	no	F446I	Lys76Thr	CVIET	Ala220Ser,Gln271Glu,Asn326Ser,Ile356Thr,Arg371Ile	Lys541Asn,Phe313Ser
MP1395	2017-06-19	2016-03-14	after	PL-0327A	region30	Cluster2	no	F446I	Lys76Thr	CVIET	Ala220Ser,Gln271Glu,Asn326Ser,Ile356Thr,	Lys541Asn,Phe313Ser
MP1378	2017-06-20	na	na	DL-262A	region25	Cluster2	no	F446I	Lys76Thr	CVIET	Ala220Ser,Gln271Glu,Asn326Ser,Ile356Thr,Arg371Ile	Lys541Asn,Phe313Ser
MP1430	2017-06-22	na	na	MK-11003	region25	Cluster2	no	F446I	na	na	Gln271Glu,Asn326Ser	Lys541Asn,Phe313Ser
MP1305	2017-06-23	na	na	MN-268C	region25	Cluster2	no	F446I	Lys76Thr	CVIET	Ala220Ser,Asn326Ser,Ile356Thr,Arg371Ile	Lys541Asn,Phe313Ser
MP1619	2017-06-26	2016-03-14	after	PL-0327A	region30	Cluster2	no	F446I	Lys76Thr	CVIET	Ala220Ser,Gln271Glu,Asn326Ser,Ile356Thr,Arg371Ile	Lys541Asn,Phe313Ser
MP1642	2017-06-26	na	na	MN-268C	region25	Cluster2	no	F446I	Lys76Thr	CVIET	Ala220Ser,Gln271Glu,Asn326Ser,Ile356Thr,Arg371Ile	Lys541Asn,Phe313Ser
MP1644	2017-06-29	2016-03-14	after	PL-0327A	region30	Cluster2	no	F446I	Lys76Thr	CVIET	Ala220Ser,Gln271Glu,Asn326Ser,Ile356Thr,Arg371Ile	Lys541Asn,Phe313Ser
MP1723	2017-07-10	na	na	HS-0364	region31	Cluster2	no	F446I	Lys76Thr	CVIET	Gln271Glu,Asn326Ser,Ile356Thr,Arg371Ile	Lys541Asn,Phe313Ser
MP1651	2017-07-30	na	na	DB-0145B	region10	Cluster2	no	F446I	Lys76Thr	CVIET	Ala220Ser,Gln271Glu,Asn326Ser,Ile356Thr,Arg371Ile	Lys541Asn,Phe313Ser
MP1104	2017-08-02	na	na	DB-0145A	region10	Cluster2	no	F446I	Lys76Thr	CVIET	Ala220Ser,Gln271Glu,Asn326Ser,Ile356Thr,Arg371Ile	Lys541Asn,Phe313Ser
MP2095	2017-08-21	na	na	HS-0364	region31	Cluster2	no	F446I	Lys76Thr	CVIET	Ala220Ser,Gln271Glu,Asn326Ser,Ile356Thr,Arg371Ile	Lys541Asn,Phe313Ser
MP1808	2017-09-04	2015-09-12	after	HT-0323	region30	Cluster2	no	F446I	Lys76Thr	CVIET	Ala220Ser,Gln271Glu,Asn326Ser,Ile356Thr,Arg371Ile	Lys541Asn,Phe313Ser
MP1899	2017-09-25	2016-03-14	after	PL-0327A	region30	Cluster2	no	F446I.wt.mix	Lys76Thr	CVIET	Ala220Ser,Gln271Glu,Asn326Ser,Ile356Thr,Arg371Ile	Lys541Asn,Phe313Ser
MP1865	2017-10-03	na	na	TK-0306	region23	Cluster2	no	F446I.wt.mix	Lys76Thr	CVIET	Ala220Ser,Gln271Glu,Asn326Ser,Ile356Thr,Arg371Ile	Lys541Asn,Phe313Ser
MP1892	2017-10-09	na	na	KL-0268A	region25	Cluster2	no	F446I	Lys76Thr	CVIET	Ala220Ser,Gln271Glu,Asn326Ser,Ile356Thr,Arg371Ile	Lys541Asn,Phe313Ser
MP1880	2017-10-16	na	na	TK-0306	region23	Cluster2	no	F446I	Lys76Thr	CVIET	Ala220Ser,Gln271Glu,Asn326Ser,Ile356Thr,Arg371Ile	Lys541Asn,Phe313Ser
MP1869	2017-10-18	na	na	HL-0365A	region28	Cluster2	no	F446I	Lys76Thr	CVIET	Ala220Ser,Gln271Glu,Asn326Ser,Ile356Thr,Arg371Ile	Phe313Ser
MP1909	2017-10-18	na	na	OT-0268D	region25	Cluster2	no	F446I	Lys76Thr	CVIET	Ala220Ser,Gln271Glu,Asn326Ser,Ile356Thr,Arg371Ile	Lys541Asn,Phe313Ser
MP2359	2017-10-25	na	na	KT-0433	region38	Cluster2	no	F446I	Lys76Thr	CVIET	Ala220Ser,Gln271Glu,Asn326Ser,Ile356Thr,Arg371Ile	Lys541Asn,Phe313Ser
MP2011	2017-11-02	na	na	HB-11007	region25	Cluster2	no	NA	Lys76Thr	CVIET	Ala220Ser,Gln271Glu,Asn326Ser	Lys541Asn,Phe313Ser
MP2345	2017-11-27	na	na	PK-0442	region37	Cluster2	no	F446I	Lys76Thr	CVIET	Ala220Ser,Gln271Glu,Asn326Ser,Ile356Thr,Arg371Ile	Lys541Asn,Phe313Ser
MP2350	2017-12-11	na	na	PH-0356A	region31	Cluster2	no	F446I	Lys76Thr	CVIET	Ala220Ser,Gln271Glu,Asn326Ser,Ile356Thr,Arg371Ile	Lys541Asn,Phe313Ser
MP2228	2017-12-15	na	na	MK-11003	region25	Cluster2	no	F446I	Lys76Thr	CVIET	Ala220Ser,Gln271Glu,Asn326Ser,Ile356Thr,Arg371Ile	Lys541Asn,Phe313Ser
MP2532	2017-12-25	2017-06-30	after	MK-363E	region30	Cluster2	no	F446I	Lys76Thr	CVIET	Ala220Ser,Gln271Glu,Asn326Ser,Ile356Thr,Arg371Ile	Lys541Asn,Phe313Ser
MP2635	2017-12-25	na	na	Clinic-11084	region22	Cluster2	no	F446I	Lys76Thr	CVIET	Ala220Ser,Gln271Glu,Asn326Ser,Ile356Thr,Arg371Ile	Lys541Asn,Phe313Ser
MP2509	2017-12-29	na	na	KT-0433	region38	Cluster2	no	F446I	Lys76Thr	CVIET	Ala220Ser,Gln271Glu,Asn326Ser,Ile356Thr,Arg371Ile	Lys541Asn,Phe313Ser
MP2574	2018-01-03	na	na	KL-0268A	region25	Cluster2	no	F446I	Lys76Thr	CVIET	Ala220Ser,Gln271Glu,Asn326Ser,Ile356Thr,Arg371Ile	Lys541Asn,Phe313Ser
MP2495	2018-01-05	2020-05-02	before	HH-0431	region37	Cluster2	no	F446I	Lys76Thr	CVIET	Ala220Ser,Gln271Glu,Asn326Ser,Ile356Thr,Arg371Ile	Lys541Asn,Phe313Ser
MP2632	2018-01-08	2017-06-30	after	MK-363E	region30	Cluster2	no	F446I.wt.mix	Lys76Thr	CVIET	Ala220Ser,Gln271Glu,Asn326Ser,Ile356Thr,Arg371Ile	Lys541Asn,Phe313Ser
MP3393	2018-01-12	2015-08-10	after	LT-0259	region27	Cluster2	no	F446I	Lys76Thr	CVIET	Ala220Ser,Gln271Glu,Asn326Ser,Ile356Thr,Arg371Ile	Lys541Asn,Phe313Ser
MP2492	2018-01-20	na	na	ML-0458A	region38	Cluster2	no	F446I	Lys76Thr	CVIET	Ala220Ser,Gln271Glu,Asn326Ser,Ile356Thr,Arg371Ile	Lys541Asn,Phe313Ser
MP2959	2018-01-23	na	na	MK-11003	region25	Cluster2	no	F446I	Lys76Thr	CVIET	Ala220Ser,Gln271Glu,Asn326Ser,Ile356Thr,Arg371Ile	Lys541Asn,Phe313Ser
MP2962	2018-01-23	na	na	MK-11003	region25	Cluster2	no	F446I	Lys76Thr	CVIET	Ala220Ser,Gln271Glu,Asn326Ser,Ile356Thr,Arg371Ile	Lys541Asn,Phe313Ser
MP2919	2018-01-29	2016-03-14	after	PL-0327A	region30	Cluster2	no	F446I.wt.mix	Lys76Thr	CVIET	Ala220Ser,Ile356Thr,Arg371Ile	Lys541Asn,Phe313Ser
MP3007	2018-01-29	2017-06-30	after	MK-363C	region30	Cluster2	no	F446I	Lys76Thr	CVIET	Ala220Ser,Gln271Glu,Asn326Ser,Ile356Thr,Arg371Ile	Lys541Asn,Phe313Ser
MP3027	2018-01-30	2017-06-30	after	MK-363C	region30	Cluster2	no	F446I	Lys76Thr	CVIET	Ala220Ser,Gln271Glu,Asn326Ser,Ile356Thr,Arg371Ile	Lys541Asn,Phe313Ser
MP2947	2018-02-03	na	na	MM-11004	region30	Cluster2	no	F446I	Lys76Thr	CVIET	Ala220Ser,Gln271Glu,Asn326Ser,Ile356Thr,Arg371Ile	Lys541Asn,Phe313Ser
MP2765	2018-02-05	na	na	KT-0433	region38	Cluster2	no	F446I	Lys76Thr	CVIET	Ala220Ser,Gln271Glu,Asn326Ser,Ile356Thr,Arg371Ile	Lys541Asn,Phe313Ser
MP2954	2018-02-07	na	na	BT-0353B	region28	Cluster2	no	F446I	Lys76Thr	CVIET	Ala220Ser,Gln271Glu,Asn326Ser,Ile356Thr,Arg371Ile	Lys541Asn,Phe313Ser
MP2886	2018-02-12	na	na	BT-0353B	region28	Cluster2	no	F446I	Lys76Thr	CVIET	Ala220Ser,Gln271Glu,Asn326Ser,Ile356Thr,Arg371Ile	Lys541Asn,Phe313Ser
MP2818	2018-02-16	2017-06-30	after	MK-363E	region30	Cluster2	no	F446I	Lys76Thr	CVIET	Ala220Ser,Gln271Glu,Asn326Ser,Ile356Thr,Arg371Ile	Lys541Asn,Phe313Ser
MP2834	2018-02-22	na	na	PH-0222	region27	Cluster2	YES-2018	F446I	Lys76Thr	CVIET	Ala220Ser,Gln271Glu,Asn326Ser,Ile356Thr,Arg371Ile	Lys541Asn,Phe313Ser
MP2757	2018-02-25	na	na	MP-0440	region37	Cluster2	no	F446I.wt.mix	Lys76Thr	CVIET	Ala220Ser,Gln271Glu,Asn326Ser,Ile356Thr,Arg371Ile	Lys541Asn,Phe313Ser
MP3221	2018-02-27	na	na	PH-0222	region27	Cluster2	no	F446I	Lys76Thr	CVIET	Gln271Glu,Asn326Ser,Ile356Thr,Arg371Ile	Lys541Asn,Phe313Ser
MP3072	2018-03-02	2016-03-13	after	KK-0206	region22	Cluster2	no	F446I	Lys76Thr	CVIET	Ala220Ser,Gln271Glu,Asn326Ser,Ile356Thr,Arg371Ile	Phe313Ser
MP3061	2018-03-12	na	na	KT-0433	region38	Cluster2	no	F446I	Lys76Thr	CVIET	Ala220Ser,Gln271Glu,Asn326Ser,Ile356Thr,Arg371Ile	Lys541Asn
MP3079	2018-03-20	na	na	OT-0268D	region25	Cluster2	no	NA	Lys76Thr	CVIET	Ala220Ser,Asn326Ser	Lys541Asn,Phe313Ser
MP3295	2018-04-23	2020-05-02	before	HH-0431	region37	Cluster2	no	F446I.wt.mix	Lys76Thr	CVIET	Ala220Ser,Gln271Glu,Asn326Ser,Arg371Ile	Lys541Asn,Phe313Ser
MP3358	2018-05-07	2016-03-13	after	KK-0206	region22	Cluster2	no	F446I	Lys76Thr	CVIET	Ala220Ser,Gln271Glu,Asn326Ser,Ile356Thr,Arg371Ile	Lys541Asn,Phe313Ser
MP3271	2018-05-14	2020-05-02	before	HH-0431	region37	Cluster2	no	F446I	Lys76Thr	CVIET	Ala220Ser,Gln271Glu,Asn326Ser,Ile356Thr,Arg371Ile	Lys541Asn,Phe313Ser
MP3845	2018-05-27	na	na	YC-12321	region50	Cluster2	no	F446I	na	na	Arg371Ile	Lys541Asn,Phe313Ser
MP3612	2018-05-28	na	na	DB-0145B	region10	Cluster2	no	F446I	Lys76Thr	CVIET	Ala220Ser,Gln271Glu,Asn326Ser,Ile356Thr,Arg371Ile	Lys541Asn,Phe313Ser
MP3664	2018-05-28	2020-05-02	before	HH-0431	region37	Cluster2	no	F446I	Lys76Thr	CVIET	Ala220Ser,Gln271Glu,Asn326Ser,Ile356Thr,Arg371Ile	Lys541Asn,Phe313Ser
MP3515	2018-05-30	na	na	MN-268C	region25	Cluster2	no	F446I	Lys76Thr	CVIET	Ala220Ser,Gln271Glu,Asn326Ser,Ile356Thr,Arg371Ile	Lys541Asn,Phe313Ser
MP3465	2018-06-05	na	na	HT-0378B	region31	Cluster2	no	F446I	Lys76Thr	CVIET	Ala220Ser,Gln271Glu,Asn326Ser,Ile356Thr,Arg371Ile	Lys541Asn,Phe313Ser
MP3537	2018-06-07	2016-03-13	after	KK-0206	region22	Cluster2	no	F446I	Lys76Thr	CVIET	Ala220Ser,Gln271Glu,Asn326Ser,Ile356Thr,Arg371Ile	Lys541Asn,Phe313Ser
MP3700	2018-06-07	na	na	KK-0608	region46	Cluster2	no	F446I.wt.mix	Lys76Thr	CVIET	Ala220Ser,Gln271Glu,Asn326Ser,Ile356Thr,Arg371Ile	Lys541Asn,Phe313Ser
MP3538	2018-06-10	na	na	Clinic-11082	region27	Cluster2	no	F446I	Lys76Thr	CVIET	Ala220Ser,Gln271Glu,Asn326Ser,Ile356Thr,Arg371Ile	Lys541Asn,Phe313Ser
MP3608	2018-06-11	2020-05-02	before	LH-0266B	region13	Cluster2	no	NA	na	na	Asn326Ser,Ile356Thr	Phe313Ser
MP3695	2018-06-11	na	na	KK-0608	region46	Cluster2	no	F446I	Lys76Thr	CVIET	Ala220Ser,Gln271Glu,Asn326Ser,Ile356Thr,Arg371Ile	Lys541Asn,Phe313Ser
MP3619	2018-06-12	2020-05-02	before	LH-0266B	region13	Cluster2	no	F446I	Lys76Thr	CVIET	Ala220Ser,Gln271Glu,Asn326Ser,Ile356Thr,Arg371Ile	Lys541Asn,Phe313Ser
MP3530	2018-06-14	na	na	PH-0222	region27	Cluster2	no	F446I	Lys76Thr	CVIET	Ala220Ser,Gln271Glu,Asn326Ser,Ile356Thr,Arg371Ile	Lys541Asn,Phe313Ser
MP3532	2018-06-15	2016-03-13	after	KK-0206	region22	Cluster2	no	F446I	Lys76Thr	CVIET	Ala220Ser,Gln271Glu,Asn326Ser,Ile356Thr,Arg371Ile	Lys541Asn,Phe313Ser
MP3929	2018-06-18	2020-05-02	before	LH-0266B	region13	Cluster2	no	F446I	Lys76Thr	CVIET	Ala220Ser,Gln271Glu,Asn326Ser,Ile356Thr,Arg371Ile	Lys541Asn,Phe313Ser
MP3954	2018-06-18	2020-05-02	before	LH-0266B	region13	Cluster2	no	F446I	Lys76Thr	CVIET	Ala220Ser,Gln271Glu,Asn326Ser,Arg371Ile	Lys541Asn,Phe313Ser
MP4023	2018-06-18	na	na	KH-12082	region44	Cluster2	no	F446I	Lys76Thr	CVIET	Ala220Ser,Gln271Glu,Asn326Ser,Ile356Thr,Arg371Ile	Lys541Asn,Phe313Ser
MP4046	2018-06-18	2016-03-13	after	KK-0206	region22	Cluster2	no	F446I	Lys76Thr	CVIET	Ala220Ser,Gln271Glu,Asn326Ser,Ile356Thr,Arg371Ile	Lys541Asn,Phe313Ser
MP4053	2018-06-18	2015-02-05	after	BK-0189	region18	Cluster2	no	F446I	Lys76Thr	CVIET	Ala220Ser,Gln271Glu,Asn326Ser,Ile356Thr,Arg371Ile	Lys541Asn,Phe313Ser
MP4101	2018-06-20	2015-02-13	after	MT-0305	region22	Cluster2	no	F446I	Lys76Thr	CVIET	Ala220Ser,Gln271Glu,Asn326Ser,Ile356Thr,Arg371Ile	Lys541Asn,Phe313Ser
MP3930	2018-06-22	2020-05-02	before	LH-0266B	region13	Cluster2	no	F446I	na	na	Ala220Ser,Gln271Glu,Ile356Thr,Arg371Ile	Lys541Asn,Phe313Ser
MP4009	2018-06-23	2015-02-18	after	KT-0219	region27	Cluster2	no	F446I	Lys76Thr	CVIET	Ala220Ser,Gln271Glu,Asn326Ser,Ile356Thr,Arg371Ile	Lys541Asn,Phe313Ser
MP3925	2018-07-02	na	na	MK-0428	region37	Cluster2	no	F446I	Lys76Thr	CVIET	Ala220Ser,Gln271Glu,Asn326Ser,Ile356Thr,Arg371Ile	Lys541Asn,Phe313Ser
MP3953	2018-07-02	2020-05-02	before	LH-0266B	region13	Cluster2	no	F446I	Lys76Thr	CVIET	Ala220Ser,Gln271Glu,Asn326Ser,Ile356Thr,Arg371Ile	Lys541Asn,Phe313Ser
MP3917	2018-07-05	na	na	MK-0428	region37	Cluster2	no	F446I	Lys76Thr	CVIET	Ala220Ser,Gln271Glu,Asn326Ser,Ile356Thr,Arg371Ile	Lys541Asn,Phe313Ser
MP3984	2018-07-07	na	na	MP-0440	region37	Cluster2	no	F446I	Lys76Thr	CVIET	Ile356Thr,Arg371Ile	Lys541Asn,Phe313Ser
MP3994	2018-07-07	na	na	KL-11013	region35	Cluster2	no	F446I	Lys76Thr	CVIET	Ala220Ser,Gln271Glu,Asn326Ser,Ile356Thr,Arg371Ile	Lys541Asn,Phe313Ser
MP3903	2018-07-11	na	na	MP-0440	region37	Cluster2	no	F446I	Lys76Thr	CVIET	Ala220Ser,Gln271Glu,Asn326Ser,Ile356Thr,Arg371Ile	Lys541Asn,Phe313Ser
MP3802	2018-07-30	na	na	MK-11047	region17	Cluster2	no	F446I	Lys76Thr	CVIET	Ala220Ser,Gln271Glu,Asn326Ser,Ile356Thr,Arg371Ile	Lys541Asn,Phe313Ser
MP3829	2018-07-30	na	na	MH-0298A	region23	Cluster2	no	F446I	Lys76Thr	CVIET	Ala220Ser,Gln271Glu,Asn326Ser,Ile356Thr,Arg371Ile	Lys541Asn,Phe313Ser
MP3782	2018-08-20	na	na	MK-0428	region37	Cluster2	no	F446I	Lys76Thr	CVIET	Ala220Ser,Gln271Glu,Asn326Ser,Ile356Thr,Arg371Ile	Lys541Asn,Phe313Ser
MP3815	2018-08-24	na	na	TR-0414	region35	Cluster2	no	F446I.wt.mix	Lys76Thr	CVIET	Ala220Ser,Gln271Glu,Asn326Ser,Ile356Thr,Arg371Ile	Lys541Asn,Phe313Ser
MP3821	2018-08-24	na	na	TR-0414	region35	Cluster2	no	F446I	Lys76Thr	CVIET	Ala220Ser,Gln271Glu,Asn326Ser,Ile356Thr,Arg371Ile	Lys541Asn,Phe313Ser
MP4143	2018-10-01	na	na	KP-0344A	region28	Cluster2	no	F446I	Lys76Thr	CVIET	Gln271Glu,Asn326Ser,Ile356Thr,Arg371Ile	Phe313Ser
MP4122	2018-10-15	na	na	AR-0267A	region15	Cluster2	no	F446I	Lys76Thr	CVIET	Ala220Ser,Gln271Glu,Asn326Ser,Ile356Thr,Arg371Ile	Lys541Asn,Phe313Ser
MP4179	2018-10-24	na	na	ML-0380B	region24	Cluster2	no	F446I	Lys76Thr	CVIET	Ala220Ser,Gln271Glu,Asn326Ser,Ile356Thr,Arg371Ile	Lys541Asn,Phe313Ser
MP4198	2018-11-04	na	na	KD-11058	region17	Cluster2	no	F446I	Lys76Thr	CVIET	Ala220Ser,Gln271Glu,Asn326Ser,Ile356Thr,Arg371Ile	Lys541Asn,Phe313Ser
MP4353	2018-11-19	2016-03-14	after	PL-0327A	region30	Cluster2	no	F446I	Lys76Thr	CVIET	Ala220Ser,Gln271Glu,Asn326Ser,Ile356Thr,Arg371Ile	Lys541Asn,Phe313Ser
MP4233	2018-11-29	na	na	MN-12230	region36	Cluster2	no	F446I	Lys76Thr	CVIET	Ala220Ser,Gln271Glu,Asn326Ser,Ile356Thr	Lys541Asn,Phe313Ser
MP4252	2018-11-30	2020-05-02	before	LH-0266B	region13	Cluster2	no	F446I	Lys76Thr	CVIET	Ala220Ser,Gln271Glu,Asn326Ser,Ile356Thr,Arg371Ile	Lys541Asn,Phe313Ser
MP4367	2018-11-30	2020-05-02	before	LH-0266B	region13	Cluster2	no	F446I	Lys76Thr	CVIET	Ala220Ser,Gln271Glu,Asn326Ser,Ile356Thr,Arg371Ile	Lys541Asn,Phe313Ser
MP4420	2018-12-14	2017-06-30	after	MK-363C	region30	Cluster2	no	F446I	Lys76Thr	CVIET	Ala220Ser,Ile356Thr,Arg371Ile	Lys541Asn,Phe313Ser
MP4323	2018-12-18	na	na	NN-0291A	region17	Cluster2	no	F446I	na	na	Asn326Ser,Ile356Thr	Lys541Asn,Phe313Ser
MP4389	2018-12-19	2017-06-30	after	MK-363C	region30	Cluster2	no	F446I	Lys76Thr	CVIET	Ala220Ser,Gln271Glu,Asn326Ser,Ile356Thr,Arg371Ile	Lys541Asn,Phe313Ser
MP4416	2018-12-19	na	na	KD-11058	region17	Cluster2	no	F446I	Lys76Thr	CVIET	Ala220Ser,Gln271Glu,Asn326Ser,Ile356Thr,Arg371Ile	Lys541Asn,Phe313Ser
MP4234	2018-12-26	na	na	PD-0248	region27	Cluster2	no	F446I	Lys76Thr	CVIET	Ala220Ser,Gln271Glu,Asn326Ser,Ile356Thr,Arg371Ile	Lys541Asn,Phe313Ser
MP4267	2018-12-26	na	na	Clinic-11082	region27	Cluster2	no	NA	Lys76Thr	CVIET	Gln271Glu,Asn326Ser,Ile356Thr,Arg371Ile	Lys541Asn,Phe313Ser
MP4344	2019-01-07	na	na	MK-0238	region27	Cluster2	no	F446I	Lys76Thr	CVIET	Ala220Ser,Gln271Glu,Asn326Ser,Ile356Thr,Arg371Ile	Lys541Asn,Phe313Ser
MP4379	2019-01-10	na	na	MK-0428	region37	Cluster2	no	F446I	Lys76Thr	CVIET	Ala220Ser,Gln271Glu,Asn326Ser,Ile356Thr,Arg371Ile	Lys541Asn,Phe313Ser
MP4432	2019-04-01	na	na	KK-0608	region46	Cluster2	YES-2019	F446I	Lys76Thr	CVIET	Ala220Ser,Gln271Glu,Asn326Ser,Ile356Thr,Arg371Ile	Lys541Asn,Phe313Ser
MP4985	2020-07-06	na	na	NH-0281A	region17	Cluster2	YES-2020	F446I	Lys76Thr	CVIET	Ala220Ser,Gln271Glu,Asn326Ser,Ile356Thr,Arg371Ile	Lys541Asn,Phe313Ser
MP1002	2016-04-26	na	na	KN-0355A	region16	Cluster3	YES-2016	P441L.wt.mix	Lys76Thr	CVIET	Ala220Ser,Gln271Glu,Asn326Ser,Ile356Thr,Arg371Ile	Phe313Ser,Ser258Leu
MP0352	2016-08-23	na	na	PK-0406A	region24	Cluster3	no	P441L	Lys76Thr	CVIET	Asn326Ser,Ile356Thr,Arg371Ile	Phe313Ser,Ser258Leu
MP0968	2017-03-06	na	na	KN-0355A	region16	Cluster3	no	P441L	Lys76Thr	CVIET	Gln271Glu,Asn326Ser,Ile356Thr,Arg371Ile	Phe313Ser,Ser258Leu
MP1557	2017-04-27	na	na	NB-11054A	region19	Cluster3	no	P441L	Lys76Thr	CVIET	Ala220Ser,Gln271Glu,Asn326Ser,Ile356Thr,Arg371Ile	Phe313Ser,Ser258Leu
MP1552	2017-06-01	2016-09-03	after	WT-0314A	region14	Cluster3	no	P441L	Lys76Thr	CVIET	Ala220Ser,Gln271Glu,Asn326Ser,Ile356Thr,Arg371Ile	Phe313Ser,Ser258Leu
MP1543	2017-06-05	na	na	NB-11054A	region19	Cluster3	no	P441L	Lys76Thr	CVIET	Ala220Ser,Gln271Glu,Asn326Ser,Ile356Thr,Arg371Ile	Phe313Ser,Ser258Leu
MP1269	2017-06-06	na	na	PP-0338A	region19	Cluster3	no	P441L	Lys76Thr	CVIET	Ala220Ser,Arg371Ile	Phe313Ser,Ser258Leu
MP1443	2017-06-06	2016-03-19	after	MH-0348A	region47	Cluster3	no	P441L	Lys76Thr	CVIET	Ala220Ser,Gln271Glu,Asn326Ser,Ile356Thr,Arg371Ile	Phe313Ser,Ser258Leu
MP1474	2017-06-07	na	na	NB-11054A	region19	Cluster3	no	P441L	Lys76Thr	CVIET	Ala220Ser,Gln271Glu,Asn326Ser,Ile356Thr,Arg371Ile	Phe313Ser,Ser258Leu
MP1550	2017-06-07	na	na	NB-11054A	region19	Cluster3	no	P441L	Lys76Thr	CVIET	Ala220Ser,Gln271Glu,Asn326Ser,Ile356Thr,Arg371Ile	Phe313Ser,Ser258Leu
MP1392	2017-06-08	2016-03-19	after	MH-0348A	region47	Cluster3	no	P441L	Lys76Thr	CVIET	Ala220Ser,Gln271Glu,Asn326Ser,Ile356Thr,Arg371Ile	Phe313Ser,Ser258Leu
MP1480	2017-06-12	na	na	MK-0265	region32	Cluster3	no	P441L	Lys76Thr	CVIET	Ala220Ser,Asn326Ser,Ile356Thr,Arg371Ile	Phe313Ser,Ser258Leu
MP1432	2017-06-14	na	na	TY-0329	region19	Cluster3	no	P441L	Lys76Thr	CVIET	Ala220Ser,Gln271Glu,Asn326Ser,Ile356Thr,Arg371Ile	Phe313Ser,Ser258Leu
MP1737	2017-07-07	na	na	MC-0393B	region24	Cluster3	no	P441L	Lys76Thr	CVIET	Ala220Ser,Gln271Glu,Asn326Ser,Ile356Thr,Arg371Ile	Phe313Ser,Ser258Leu
MP1736	2017-07-08	na	na	KN-0355A	region16	Cluster3	no	P441L	Lys76Thr	CVIET	Ala220Ser,Gln271Glu,Asn326Ser,Ile356Thr,Arg371Ile	Phe313Ser,Ser258Leu
MP1118	2017-08-02	na	na	ML-0380A	region24	Cluster3	no	P441L	Lys76Thr	CVIET	Ala220Ser,Gln271Glu,Asn326Ser,Ile356Thr,Arg371Ile	Phe313Ser,Ser258Leu
MP1086	2017-08-10	na	na	HB-0320A	region21	Cluster3	no	P441L	Lys76Thr	CVIET	Ala220Ser,Gln271Glu,Asn326Ser,Ile356Thr,Arg371Ile	Phe313Ser,Ser258Leu
MP1077	2017-08-14	na	na	TY-0329	region19	Cluster3	no	P441L	Lys76Thr	CVIET	Ala220Ser,Gln271Glu,Asn326Ser,Ile356Thr,Arg371Ile	Phe313Ser,Ser258Leu
MP1219	2017-08-31	2020-05-02	before	LH-0266B	region13	Cluster3	no	P441L.wt.mix	Lys76Thr	CVIET	Ala220Ser,Gln271Glu,Asn326Ser,Ile356Thr,Arg371Ile	Phe313Ser,Ser258Leu
MP1843	2017-09-26	na	na	PW-0244A	region11	Cluster3	no	P441L	Lys76Thr	CVIET	Ala220Ser,Gln271Glu,Asn326Ser,Ile356Thr,Arg371Ile	Phe313Ser,Ser258Leu
MP1834	2017-10-09	na	na	NB-11054A	region19	Cluster3	no	P441L	Lys76Thr	CVIET	Ala220Ser,Gln271Glu,Asn326Ser,Ile356Thr,Arg371Ile	Phe313Ser,Ser258Leu
MP1889	2017-10-14	na	na	MK-11047	region17	Cluster3	no	P441L	Lys76Thr	CVIET	Ala220Ser,Gln271Glu,Asn326Ser,Ile356Thr,Arg371Ile	Phe313Ser,Ser258Leu
MP1827	2017-10-16	na	na	LW-0310A	region14	Cluster3	no	P441L	Lys76Thr	CVIET	Ala220Ser,Gln271Glu,Asn326Ser,Ile356Thr,Arg371Ile	Phe313Ser,Ser258Leu
MP1830	2017-10-16	na	na	NB-11054A	region19	Cluster3	no	P441L	Lys76Thr	CVIET	Ala220Ser,Gln271Glu,Asn326Ser,Ile356Thr,Arg371Ile	Phe313Ser,Ser258Leu
MP1836	2017-10-17	na	na	NB-11051A	region19	Cluster3	no	P441L	Lys76Thr	CVIET	Ala220Ser,Gln271Glu,Asn326Ser,Ile356Thr,Arg371Ile	Phe313Ser,Ser258Leu
MP2362	2017-10-17	2016-09-03	after	WT-0314A	region14	Cluster3	no	P441L	Lys76Thr	CVIET	Ala220Ser,Gln271Glu,Asn326Ser,Ile356Thr,Arg371Ile	Phe313Ser,Ser258Leu
MP1832	2017-10-20	na	na	DL-262B	region14	Cluster3	no	P441L	Lys76Thr	CVIET	Ala220Ser,Gln271Glu,Asn326Ser,Ile356Thr,Arg371Ile	Phe313Ser,Ser258Leu
MP1842	2017-10-22	na	na	NB-11051A	region19	Cluster3	no	P441L	Lys76Thr	CVIET	Ala220Ser,Gln271Glu,Asn326Ser,Ile356Thr,Arg371Ile	Phe313Ser,Ser258Leu
MP1990	2017-10-23	na	na	LP-214A	region12	Cluster3	no	P441L	Lys76Thr	CVIET	Ala220Ser,Gln271Glu,Asn326Ser,Ile356Thr,Arg371Ile	Phe313Ser,Ser258Leu
MP2092	2017-10-23	2016-09-03	after	WT-0314A	region14	Cluster3	no	P441L	Lys76Thr	CVIET	Ala220Ser,Gln271Glu,Asn326Ser,Ile356Thr,Arg371Ile	Phe313Ser,Ser258Leu
MP2036	2017-10-25	2016-09-03	after	WT-0314A	region14	Cluster3	no	P441L	Lys76Thr	CVIET	Ala220Ser,Gln271Glu,Asn326Ser,Ile356Thr,Arg371Ile	Phe313Ser,Ser258Leu
MP2074	2017-10-25	na	na	TY-0329	region19	Cluster3	no	P441L	Lys76Thr	CVIET	Ala220Ser,Gln271Glu,Asn326Ser,Ile356Thr,Arg371Ile	Phe313Ser,Ser258Leu
METF.HRP.5	2017-10-26	na	na	WT-0314A	region14	Cluster3	no	P441L	Lys76Thr	CVIET	Ala220Ser,Gln271Glu,Asn326Ser,Ile356Thr,Arg371Ile	Phe313Ser,Ser258Leu
MP2000	2017-10-27	na	na	KP-11046A	region14	Cluster3	YES-2017	P441L	Lys76Thr	CVIET	Ala220Ser,Gln271Glu,Asn326Ser,Ile356Thr,Arg371Ile	Phe313Ser,Ser258Leu
MP2035	2017-10-28	na	na	KP-11046A	region14	Cluster3	no	P441L	Lys76Thr	CVIET	Ala220Ser,Gln271Glu,Asn326Ser,Ile356Thr,Arg371Ile	Phe313Ser,Ser258Leu
MP2047	2017-10-30	na	na	NB-11051A	region19	Cluster3	no	P441L	Lys76Thr	CVIET	Ala220Ser,Gln271Glu,Asn326Ser,Ile356Thr,Arg371Ile	Phe313Ser,Ser258Leu
MP1966	2017-10-31	na	na	PK-0406A	region24	Cluster3	no	P441L	Lys76Thr	CVIET	Ala220Ser,Gln271Glu,Asn326Ser,Ile356Thr,Arg371Ile	Phe313Ser,Ser258Leu
MP2046	2017-10-31	2016-09-03	after	WT-0314A	region14	Cluster3	no	P441L	Lys76Thr	CVIET	Ala220Ser,Gln271Glu,Asn326Ser,Ile356Thr,Arg371Ile	Phe313Ser,Ser258Leu
MP2045	2017-11-01	2016-09-03	after	WT-0314A	region14	Cluster3	no	P441L	Lys76Thr	CVIET	Ala220Ser,Gln271Glu,Asn326Ser,Ile356Thr,Arg371Ile	Phe313Ser,Ser258Leu
MP2053	2017-11-01	2016-09-03	after	WT-0314A	region14	Cluster3	no	P441L	Lys76Thr	CVIET	Ala220Ser,Gln271Glu,Asn326Ser,Ile356Thr,Arg371Ile	Phe313Ser,Ser258Leu
MP1959	2017-11-02	na	na	PK-0406A	region24	Cluster3	no	P441L	Lys76Thr	CVIET	Ala220Ser,Gln271Glu,Asn326Ser,Ile356Thr,Arg371Ile	Phe313Ser,Ser258Leu
MP1964	2017-11-02	na	na	PK-0406A	region24	Cluster3	no	P441L	Lys76Thr	CVIET	Ala220Ser,Gln271Glu,Asn326Ser,Ile356Thr,Arg371Ile	Phe313Ser,Ser258Leu
MP1965	2017-11-02	na	na	PK-0406A	region24	Cluster3	no	P441L	Lys76Thr	CVIET	Ala220Ser,Gln271Glu,Asn326Ser,Ile356Thr,Arg371Ile	Phe313Ser,Ser258Leu
MP2068	2017-11-03	na	na	MK-0265	region32	Cluster3	no	P441L	Lys76Thr	CVIET	Ala220Ser,Gln271Glu,Asn326Ser,Ile356Thr,Arg371Ile	Phe313Ser,Ser258Leu
MP2096	2017-11-06	2016-09-03	after	WT-0314A	region14	Cluster3	no	P441L	Lys76Thr	CVIET	Ala220Ser,Gln271Glu,Asn326Ser,Ile356Thr,Arg371Ile	Phe313Ser,Ser258Leu
MP1998	2017-11-07	na	na	NB-11054A	region19	Cluster3	no	P441L	Lys76Thr	CVIET	Ala220Ser,Gln271Glu,Asn326Ser,Ile356Thr,Arg371Ile	Phe313Ser
MP2064	2017-11-07	na	na	NB-11054A	region19	Cluster3	no	P441L	Lys76Thr	CVIET	Ala220Ser,Gln271Glu,Asn326Ser,Ile356Thr,Arg371Ile	na
MP2005	2017-11-08	na	na	PK-0406A	region24	Cluster3	no	P441L	Lys76Thr	CVIET	Ala220Ser,Gln271Glu,Asn326Ser,Ile356Thr,Arg371Ile	Phe313Ser,Ser258Leu
MP2026	2017-11-08	na	na	PK-0406A	region24	Cluster3	no	P441L	Lys76Thr	CVIET	Ala220Ser,Gln271Glu,Asn326Ser,Ile356Thr,Arg371Ile	Phe313Ser,Ser258Leu
MP2070	2017-11-08	2016-09-03	after	WT-0314A	region14	Cluster3	no	P441L	Lys76Thr	CVIET	Ala220Ser,Gln271Glu,Asn326Ser,Ile356Thr,Arg371Ile	Phe313Ser,Ser258Leu
MP2073	2017-11-08	na	na	NB-11054A	region19	Cluster3	no	P441L	Lys76Thr	CVIET	Ala220Ser,Gln271Glu,Asn326Ser,Ile356Thr,Arg371Ile	Phe313Ser,Ser258Leu
MP2138	2017-11-11	2016-09-03	after	WT-0314A	region14	Cluster3	no	P441L	Lys76Thr	CVIET	Ala220Ser,Gln271Glu,Asn326Ser,Ile356Thr,Arg371Ile	Phe313Ser,Ser258Leu
MP2194	2017-11-27	2016-08-31	after	PL-0366	region26	Cluster3	no	P441L	Lys76Thr	CVIET	Ala220Ser,Gln271Glu,Asn326Ser,Ile356Thr,Arg371Ile	Phe313Ser,Ser258Leu
MP2179	2017-11-28	na	na	PK-0406A	region24	Cluster3	no	P441L	Lys76Thr	CVIET	Ala220Ser,Gln271Glu,Asn326Ser,Ile356Thr,Arg371Ile	Phe313Ser,Ser258Leu
MP2191	2017-11-29	na	na	WT-11053A	region14	Cluster3	no	P441L	Lys76Thr	CVIET	Ala220Ser,Gln271Glu,Asn326Ser,Ile356Thr,Arg371Ile	Phe313Ser,Ser258Leu
MP2075	2017-11-30	2016-03-18	after	KW-0301A	region14	Cluster3	no	P441L	Lys76Thr	CVIET	Gln271Glu	Phe313Ser,Ser258Leu
MP2219	2017-12-05	na	na	PK-0406A	region24	Cluster3	no	P441L	Lys76Thr	CVIET	Ala220Ser,Gln271Glu,Asn326Ser,Ile356Thr,Arg371Ile	Phe313Ser,Ser258Leu
MP2416	2017-12-11	2016-03-18	after	DH-0315A	region21	Cluster3	no	P441L	Lys76Thr	CVIET	Ala220Ser,Gln271Glu,Asn326Ser,Ile356Thr,Arg371Ile	Phe313Ser,Ser258Leu
MP2471	2017-12-13	2016-09-03	after	WT-0314A	region14	Cluster3	no	P441L	Lys76Thr	CVIET	Ala220Ser,Gln271Glu,Asn326Ser,Ile356Thr,Arg371Ile	Phe313Ser,Ser258Leu
MP2725	2017-12-14	na	na	TY-0329	region19	Cluster3	no	P441L	Lys76Thr	CVIET	Ala220Ser,Gln271Glu,Asn326Ser,Ile356Thr,Arg371Ile	Phe313Ser,Ser258Leu
MP2468	2017-12-15	na	na	WT-11053A	region14	Cluster3	no	P441L	Lys76Thr	CVIET	Ala220Ser,Gln271Glu,Asn326Ser,Ile356Thr,Arg371Ile	Phe313Ser,Ser258Leu
MP2404	2017-12-18	na	na	TY-0329	region19	Cluster3	no	P441L	Lys76Thr	CVIET	Ala220Ser,Gln271Glu,Asn326Ser,Ile356Thr,Arg371Ile	Phe313Ser,Ser258Leu
MP2395	2017-12-21	2016-09-03	after	WT-0314A	region14	Cluster3	no	P441L	Lys76Thr	CVIET	Ala220Ser,Gln271Glu,Asn326Ser,Ile356Thr,Arg371Ile	Phe313Ser,Ser258Leu
MP2399	2017-12-26	2016-09-03	after	WT-0314A	region14	Cluster3	no	P441L	Lys76Thr	CVIET	Ala220Ser,Gln271Glu,Asn326Ser,Ile356Thr,Arg371Ile	Phe313Ser,Ser258Leu
MP2411	2017-12-27	na	na	TY-0329	region19	Cluster3	no	P441L	Lys76Thr	CVIET	Ala220Ser,Gln271Glu,Asn326Ser,Ile356Thr,Arg371Ile	Phe313Ser,Ser258Leu
MP2696	2018-01-01	na	na	SP-0362A	region16	Cluster3	no	P441L	Lys76Thr	CVIET	Ala220Ser,Gln271Glu,Asn326Ser,Ile356Thr,Arg371Ile	Phe313Ser,Ser258Leu
MP2730	2018-01-02	na	na	KN-0355A	region16	Cluster3	no	P441L	Lys76Thr	CVIET	Ala220Ser,Gln271Glu,Asn326Ser,Ile356Thr,Arg371Ile	Phe313Ser,Ser258Leu
MP2654	2018-01-08	2017-06-30	after	MK-363C	region30	Cluster3	no	P441L	Lys76Thr	CVIET	Ala220Ser,Gln271Glu,Asn326Ser,Ile356Thr,Arg371Ile	Phe313Ser,Ser258Leu
MP2444	2018-01-09	2020-05-02	before	LH-0266B	region13	Cluster3	no	P441L	Lys76Thr	CVIET	Ala220Ser,Gln271Glu,Asn326Ser,Ile356Thr,Arg371Ile	Phe313Ser,Ser258Leu
MP2550	2018-01-15	na	na	KN-0355A	region16	Cluster3	no	P441L	Lys76Thr	CVIET	Ala220Ser,Gln271Glu,Asn326Ser,Ile356Thr,Arg371Ile	Phe313Ser,Ser258Leu
MP2386	2018-01-16	na	na	WM-0416B	region24	Cluster3	no	P441L	Lys76Thr	CVIET	Ala220Ser,Gln271Glu,Asn326Ser,Ile356Thr,Arg371Ile	Phe313Ser,Ser258Leu
MP2999	2018-01-29	2016-03-18	after	DH-0315A	region21	Cluster3	no	P441L	Lys76Thr	CVIET	Ala220Ser,Gln271Glu,Asn326Ser,Ile356Thr,Arg371Ile	Phe313Ser,Ser258Leu
MP2764	2018-01-30	na	na	PK-0406A	region24	Cluster3	no	P441L	Lys76Thr	CVIET	Ala220Ser,Gln271Glu,Asn326Ser,Ile356Thr,Arg371Ile	Phe313Ser,Ser258Leu
MP2792	2018-02-06	na	na	NN-0287A	region17	Cluster3	no	P441L	Lys76Thr	CVIET	Ala220Ser,Gln271Glu,Asn326Ser,Ile356Thr,Arg371Ile	Ser258Leu
MP2859	2018-02-07	na	na	MK-0265	region32	Cluster3	no	P441L	Lys76Thr	CVIET	Ala220Ser,Gln271Glu,Asn326Ser,Ile356Thr,Arg371Ile	Phe313Ser,Ser258Leu
MP2791	2018-02-13	na	na	NK_11800A	region11	Cluster3	no	P441L	Lys76Thr	CVIET	Ala220Ser,Gln271Glu,Asn326Ser,Ile356Thr,Arg371Ile	Phe313Ser,Ser258Leu
MP3341	2018-02-13	na	na	MK-0426	region37	Cluster3	no	P441L	Lys76Thr	CVIET	Ala220Ser,Asn326Ser,Arg371Ile	Phe313Ser
MP3346	2018-02-19	na	na	MK-0426	region37	Cluster3	no	P441L	Lys76Thr	CVIET	Ala220Ser,Gln271Glu,Asn326Ser,Ile356Thr,Arg371Ile	Phe313Ser,Ser258Leu
MP3054	2018-03-01	2016-03-13	after	PH-0336A	region19	Cluster3	no	P441L	Lys76Thr	CVIET	Ala220Ser,Gln271Glu,Asn326Ser,Ile356Thr,Arg371Ile	Phe313Ser,Ser258Leu
MP3185	2018-04-02	na	na	SP-0362A	region16	Cluster3	no	P441L	Lys76Thr	CVIET	Ala220Ser,Gln271Glu,Asn326Ser,Ile356Thr,Arg371Ile	Phe313Ser,Ser258Leu
MP3211	2018-04-02	na	na	SP-0362A	region16	Cluster3	no	P441L	Lys76Thr	CVIET	Ala220Ser,Gln271Glu,Asn326Ser,Ile356Thr,Arg371Ile	Phe313Ser,Ser258Leu
MP3372	2018-04-23	na	na	MT-11020A	region47	Cluster3	no	P441L	na	na	Asn326Ser,Ile356Thr,Arg371Ile	Phe313Ser,Ser258Leu
MP3320	2018-05-01	na	na	SP-0362A	region16	Cluster3	no	P441L.wt.mix	Lys76Thr	CVIET	Ala220Ser,Gln271Glu,Asn326Ser,Ile356Thr,Arg371Ile	Phe313Ser,Ser258Leu
MP3375	2018-05-01	na	na	MC-0393B	region24	Cluster3	no	P441L	Lys76Thr	CVIET	Ala220Ser,Gln271Glu,Asn326Ser,Ile356Thr,Arg371Ile	Phe313Ser,Ser258Leu
MP3379	2018-05-07	na	na	MT-11020A	region47	Cluster3	no	P441L	Lys76Thr	CVIET	Ala220Ser,Gln271Glu,Asn326Ser,Ile356Thr,Arg371Ile	Phe313Ser,Ser258Leu
MP3336	2018-05-09	na	na	MT-11020A	region47	Cluster3	no	P441L	Lys76Thr	CVIET	Ala220Ser,Gln271Glu,Asn326Ser,Ile356Thr,Arg371Ile	Phe313Ser,Ser258Leu
MP3260	2018-05-16	na	na	MC-0393B	region24	Cluster3	no	P441L	Lys76Thr	CVIET	Ala220Ser,Gln271Glu,Asn326Ser,Ile356Thr,Arg371Ile	Phe313Ser,Ser258Leu
MP3670	2018-05-28	na	na	NB-11054A	region19	Cluster3	no	P441L.wt.mix	na	na	Ala220Ser,Asn326Ser,Ile356Thr,Arg371Ile	Phe313Ser
MP3666	2018-05-31	2016-03-13	after	PH-0336A	region19	Cluster3	no	P441L	Lys76Thr	CVIET	Ala220Ser,Gln271Glu,Asn326Ser,Ile356Thr,Arg371Ile	Phe313Ser,Ser258Leu
MP3636	2018-06-12	na	na	ML-0380A	region24	Cluster3	no	P441L	Lys76Thr	CVIET	Ala220Ser,Gln271Glu,Asn326Ser,Ile356Thr,Arg371Ile	Phe313Ser,Ser258Leu
MP3906	2018-06-18	na	na	KT-0433	region38	Cluster3	no	P441L	Lys76Thr	CVIET	Ala220Ser,Gln271Glu,Asn326Ser,Ile356Thr,Arg371Ile	Phe313Ser,Ser258Leu
MP3951	2018-06-18	na	na	PT-0395	region35	Cluster3	no	NA	Lys76Thr	CVIET	Ala220Ser,Gln271Glu,Asn326Ser,Ile356Thr,Arg371Ile	Phe313Ser,Ser258Leu
MP4084	2018-06-19	na	na	WW-0381	region26	Cluster3	no	P441L	Lys76Thr	CVIET	Ala220Ser,Gln271Glu,Asn326Ser,Arg371Ile	Phe313Ser,Ser258Leu
MP4079	2018-06-20	na	na	WW-0381	region26	Cluster3	no	P441L	Lys76Thr	CVIET	Ala220Ser,Gln271Glu,Asn326Ser,Ile356Thr,Arg371Ile	Phe313Ser,Ser258Leu
MP3976	2018-06-21	na	na	MK-0428	region37	Cluster3	no	P441L	Lys76Thr	CVIET	Ala220Ser,Gln271Glu,Asn326Ser,Ile356Thr,Arg371Ile	Phe313Ser,Ser258Leu
MP4106	2018-06-25	na	na	WW-0381	region26	Cluster3	no	P441L	Lys76Thr	CVIET	Ala220Ser,Gln271Glu,Asn326Ser,Ile356Thr,Arg371Ile	Phe313Ser,Ser258Leu
MP3941	2018-06-27	2016-03-13	after	PH-0336A	region19	Cluster3	no	P441L	Lys76Thr	CVIET	Ala220Ser,Gln271Glu,Asn326Ser,Ile356Thr,Arg371Ile	Phe313Ser,Ser258Leu
MP3939	2018-07-02	na	na	MT-11020A	region47	Cluster3	no	P441L	Lys76Thr	CVIET	Ala220Ser,Gln271Glu,Asn326Ser,Ile356Thr,Arg371Ile	Phe313Ser,Ser258Leu
MP4110	2018-07-06	na	na	MC-0393B	region24	Cluster3	no	P441L	Lys76Thr	CVIET	Ala220Ser,Gln271Glu,Asn326Ser,Ile356Thr,Arg371Ile	Phe313Ser,Ser258Leu
MP3793	2018-07-23	na	na	WW-0381	region26	Cluster3	no	P441L	Lys76Thr	CVIET	Gln271Glu,Asn326Ser,Ile356Thr,Arg371Ile	Phe313Ser,Ser258Leu
MP3803	2018-07-29	na	na	MP-0440	region37	Cluster3	no	P441L	Lys76Thr	CVIET	Ala220Ser,Gln271Glu,Asn326Ser,Ile356Thr,Arg371Ile	Phe313Ser,Ser258Leu
MP4186	2018-11-05	2016-09-03	after	WT-0314A	region14	Cluster3	no	P441L	Lys76Thr	CVIET	Ala220Ser,Gln271Glu,Asn326Ser,Ile356Thr,Arg371Ile	Phe313Ser,Ser258Leu
MP4393	2018-11-19	na	na	KK-0460	region37	Cluster3	YES-2018	P441L	Lys76Thr	CVIET	Ala220Ser,Gln271Glu,Asn326Ser,Ile356Thr,Arg371Ile	Phe313Ser,Ser258Leu
MP4413	2018-11-21	na	na	NB-11051A	region19	Cluster3	no	P441L	Lys76Thr	CVIET	Ala220Ser,Gln271Glu,Asn326Ser,Ile356Thr,Arg371Ile	Phe313Ser,Ser258Leu
MP4256	2018-12-10	na	na	MK-0426	region37	Cluster3	no	P441L	Lys76Thr	CVIET	Ala220Ser,Gln271Glu,Asn326Ser,Ile356Thr,Arg371Ile	Phe313Ser,Ser258Leu
MP4282	2018-12-10	na	na	NK-0425A	region35	Cluster3	no	P441L	Lys76Thr	CVIET	Ala220Ser,Gln271Glu,Asn326Ser,Ile356Thr,Arg371Ile	Phe313Ser,Ser258Leu
MP4724	2018-12-19	2016-03-13	after	PH-0336A	region19	Cluster3	no	P441L	Lys76Thr	CVIET	Ala220Ser,Gln271Glu,Asn326Ser,Ile356Thr,Arg371Ile	Phe313Ser,Ser258Leu
MP4253	2018-12-26	na	na	PP-0338A	region19	Cluster3	no	P441L	Lys76Thr	CVIET	Ala220Ser,Gln271Glu,Asn326Ser,Ile356Thr,Arg371Ile	Phe313Ser,Ser258Leu
MP4294	2019-01-03	na	na	PP-0338A	region19	Cluster3	no	P441L	Lys76Thr	CVIET	Ala220Ser,Gln271Glu,Asn326Ser,Ile356Thr,Arg371Ile	Phe313Ser,Ser258Leu
MP4336	2019-01-04	na	na	MK-0428	region37	Cluster3	no	P441L	Lys76Thr	CVIET	Ala220Ser,Gln271Glu,Asn326Ser,Ile356Thr,Arg371Ile	Phe313Ser,Ser258Leu
MP4368	2019-01-07	na	na	PP-0338A	region19	Cluster3	YES-2019	P441L	Lys76Thr	CVIET	Ala220Ser,Gln271Glu,Asn326Ser,Ile356Thr,Arg371Ile	Phe313Ser,Ser258Leu
MP4322	2019-01-08	na	na	MK-0428	region37	Cluster3	no	P441L	Lys76Thr	CVIET	Gln271Glu,Asn326Ser,Ile356Thr,Arg371Ile	Phe313Ser,Ser258Leu
MP4332	2019-01-09	na	na	MK-0428	region37	Cluster3	no	P441L	Lys76Thr	CVIET	Ala220Ser,Gln271Glu,Asn326Ser,Ile356Thr,Arg371Ile	Phe313Ser,Ser258Leu
MP4351	2019-01-10	na	na	MK-0428	region37	Cluster3	no	P441L	Lys76Thr	CVIET	Ala220Ser,Gln271Glu,Asn326Ser,Ile356Thr,Arg371Ile	Phe313Ser,Ser258Leu
MP4370	2019-01-12	na	na	LK-0462A	region37	Cluster3	no	P441L	Lys76Thr	CVIET	Ala220Ser,Gln271Glu,Asn326Ser,Ile356Thr,Arg371Ile	Phe313Ser,Ser258Leu
MP4243	2019-01-14	na	na	NB-11054A	region19	Cluster3	no	P441L	Lys76Thr	CVIET	Ala220Ser,Gln271Glu,Asn326Ser,Ile356Thr,Arg371Ile	Phe313Ser,Ser258Leu
MP4264	2019-01-24	na	na	PP-0338A	region19	Cluster3	no	P441L	Lys76Thr	CVIET	Ala220Ser,Gln271Glu,Asn326Ser,Ile356Thr,Arg371Ile	Phe313Ser,Ser258Leu
MP4474	2019-02-04	na	na	PP-0338A	region19	Cluster3	no	P441L	Lys76Thr	CVIET	Ala220Ser	Phe313Ser,Ser258Leu
MP4448	2019-02-14	2020-05-02	before	HH-0431	region37	Cluster3	no	P441L	Lys76Thr	CVIET	Ala220Ser,Gln271Glu,Asn326Ser,Ile356Thr,Arg371Ile	Phe313Ser,Ser258Leu
MP4732	2019-03-14	na	na	TR-0414	region35	Cluster3	no	P441L	Lys76Thr	CVIET	Ala220Ser,Gln271Glu,Asn326Ser,Ile356Thr,Arg371Ile	Phe313Ser,Ser258Leu
MP4484	2019-03-27	2020-05-02	before	HH-0431	region37	Cluster3	no	P441L	Lys76Thr	CVIET	Ala220Ser,Gln271Glu,Asn326Ser,Ile356Thr,Arg371Ile	Phe313Ser,Ser258Leu
MP4781	2019-10-28	na	na	CL-0285	region32	Cluster3	no	P441L	Lys76Thr	CVIET	Ala220Ser,Gln271Glu,Asn326Ser,Ile356Thr,Arg371Ile	Phe313Ser,Ser258Leu
MP4770	2019-11-01	na	na	ML-0363B	region30	Cluster3	no	P441L	Lys76Thr	CVIET	Ala220Ser,Gln271Glu,Asn326Ser,Ile356Thr,Arg371Ile	Phe313Ser,Ser258Leu
MP4810	2019-12-07	na	na	CL-0285	region32	Cluster3	no	P441L	Lys76Thr	CVIET	Ala220Ser,Gln271Glu,Asn326Ser,Ile356Thr,Arg371Ile	Phe313Ser,Ser258Leu
MP0026	2016-06-18	na	na	MN-268C	region25	Cluster4	no	G449A	Lys76Thr	CVIET	Ala220Ser,Gln271Glu,Asn326Ser,Ile356Thr,Arg371Ile	Lys541Asn,Phe313Ser
METF.HRP.6	2016-06-25	na	na	MK-363C	region30	Cluster4	no	G449A	Lys76Thr	CVIET	Ala220Ser,Gln271Glu,Asn326Ser,Ile356Thr,Arg371Ile	Lys541Asn,Phe313Ser
MP0154	2016-07-13	2016-03-14	after	PL-0327A	region30	Cluster4	YES-2016	G449A	Lys76Thr	CVIET	Ala220Ser,Gln271Glu,Asn326Ser,Ile356Thr,Arg371Ile	Lys541Asn,Phe313Ser
MP0373	2016-09-08	na	na	MH-0298A	region23	Cluster4	no	G449A	Lys76Thr	CVIET	Ala220Ser,Gln271Glu,Asn326Ser,Ile356Thr,Arg371Ile	Lys541Asn,Phe313Ser
MP0521	2016-11-21	na	na	KP-0344B	region28	Cluster4	no	G449A	na	na	Asn326Ser,Ile356Thr,Arg371Ile	Lys541Asn,Phe313Ser
MP0691	2017-01-13	na	na	KP-0344A	region28	Cluster4	no	G449A	Lys76Thr	CVIET	Ala220Ser,Gln271Glu,Asn326Ser,Arg371Ile	Lys541Asn,Phe313Ser
MP0694	2017-01-14	na	na	HB-0340A	region28	Cluster4	no	G449A	Lys76Thr	CVIET	Ala220Ser,Gln271Glu,Asn326Ser,Ile356Thr,Arg371Ile	Lys541Asn,Phe313Ser
MP0743	2017-01-14	na	na	HB-0340A	region28	Cluster4	no	G449A	Lys76Thr	CVIET	Ala220Ser,Gln271Glu,Asn326Ser,Ile356Thr,Arg371Ile	Lys541Asn,Phe313Ser
MP0777	2017-01-19	2015-09-07	after	BP-0321A	region23	Cluster4	no	G449A	Lys76Thr	CVIET	Ala220Ser,Gln271Glu,Asn326Ser,Ile356Thr,Arg371Ile	Lys541Asn,Phe313Ser
MP0833	2017-01-20	na	na	KP-0344A	region28	Cluster4	no	G449A	Lys76Thr	CVIET	Ala220Ser,Gln271Glu,Asn326Ser,Ile356Thr,Arg371Ile	Lys541Asn,Phe313Ser
MP0855	2017-02-13	na	na	MK-11047	region17	Cluster4	no	G449A	Lys76Thr	CVIET	Ala220Ser,Gln271Glu,Asn326Ser,Ile356Thr,Arg371Ile	Lys541Asn,Phe313Ser
MP1145	2017-05-03	na	na	KL-0268A	region25	Cluster4	no	G449A	Lys76Thr	CVIET	Ala220Ser,Gln271Glu,Asn326Ser,Ile356Thr,Arg371Ile	Lys541Asn,Phe313Ser
MP1274	2017-06-05	na	na	KL-0268A	region25	Cluster4	no	G449A	Lys76Thr	CVIET	Ala220Ser,Gln271Glu,Asn326Ser,Ile356Thr,Arg371Ile	Lys541Asn,Phe313Ser
MP1287	2017-06-14	na	na	MK-11003	region25	Cluster4	no	G449A	Lys76Thr	CVIET	Ala220Ser,Gln271Glu,Asn326Ser,Ile356Thr,Arg371Ile	Lys541Asn,Phe313Ser
MP1431	2017-06-20	na	na	MH-0298A	region23	Cluster4	no	G449A	Lys76Thr	CVIET	Ala220Ser,Gln271Glu,Asn326Ser,Ile356Thr,Arg371Ile	Lys541Asn,Phe313Ser
MP1354	2017-06-22	na	na	KL-0268A	region25	Cluster4	no	G449A	Lys76Thr	CVIET	Ala220Ser,Gln271Glu,Asn326Ser,Ile356Thr,Arg371Ile	Lys541Asn,Phe313Ser
MP1628	2017-06-26	na	na	KL-0268A	region25	Cluster4	no	G449A	Lys76Thr	CVIET	Ala220Ser,Gln271Glu,Asn326Ser,Ile356Thr,Arg371Ile	Lys541Asn,Phe313Ser
MP1689	2017-06-26	na	na	MK-0238	region27	Cluster4	no	G449A.wt.mix	Lys76Thr	CVIET	Ala220Ser,Gln271Glu,Asn326Ser,Ile356Thr,Arg371Ile	Lys541Asn,Phe313Ser
MP1663	2017-07-04	na	na	KL-0268A	region25	Cluster4	no	G449A	Lys76Thr	CVIET	Ala220Ser,Gln271Glu,A/G,Ile356Thr,Arg371Ile	Lys541Asn,Phe313Ser
MP1629	2017-07-19	na	na	MN-268C	region25	Cluster4	no	G449A	Lys76Thr	CVIET	Ala220Ser,Gln271Glu,Asn326Ser,Ile356Thr,Arg371Ile	Lys541Asn,Phe313Ser
MP2134	2017-11-14	na	na	MK-11003	region25	Cluster4	no	G449A	na	na	Ala220Ser,Gln271Glu,Asn326Ser,Ile356Thr,Arg371Ile	Lys541Asn
MP2059	2017-11-24	na	na	KL-0268A	region25	Cluster4	no	G449A	Lys76Thr	CVIET	Ala220Ser,Gln271Glu,Asn326Ser,Ile356Thr,Arg371Ile	Lys541Asn,Phe313Ser
MP2337	2017-11-28	na	na	LT-0133A	region9	Cluster4	no	G449A	Lys76Thr	CVIET	Ala220Ser,Gln271Glu,Asn326Ser,Ile356Thr,Arg371Ile	Lys541Asn,Phe313Ser
MP2330	2017-12-01	na	na	KL-0268A	region25	Cluster4	YES-2017	G449A	Lys76Thr	CVIET	Ala220Ser,Gln271Glu,Asn326Ser,Ile356Thr,Arg371Ile	Lys541Asn,Phe313Ser
MP2352	2017-12-01	na	na	KL-0268A	region25	Cluster4	no	G449A	Lys76Thr	CVIET	Ala220Ser,Gln271Glu,Asn326Ser,Ile356Thr,Arg371Ile	Lys541Asn,Phe313Ser
MP2255	2017-12-04	na	na	HB-0272A	region25	Cluster4	no	G449A	Lys76Thr	CVIET	Ala220Ser,Gln271Glu,Asn326Ser,Ile356Thr,Arg371Ile	Lys541Asn,Phe313Ser
MP2316	2017-12-04	na	na	KL-0268B	region25	Cluster4	no	G449A	Lys76Thr	CVIET	Ala220Ser,Gln271Glu,Asn326Ser,Ile356Thr,Arg371Ile	Lys541Asn,Phe313Ser
MP2323	2017-12-04	na	na	OT-0268D	region25	Cluster4	no	G449A.wt.mix	Lys76Thr	CVIET	Ala220Ser,Gln271Glu,Asn326Ser,Ile356Thr,Arg371Ile	Lys541Asn,Phe313Ser
MP2286	2017-12-05	na	na	KL-0268A	region25	Cluster4	no	G449A	Lys76Thr	CVIET	Ala220Ser,Gln271Glu,Asn326Ser,Ile356Thr,Arg371Ile	Lys541Asn,Phe313Ser
MP2356	2017-12-06	na	na	OT-0268D	region25	Cluster4	no	G449A	Lys76Thr	CVIET	Ala220Ser,Gln271Glu,Asn326Ser,Ile356Thr,Arg371Ile	Lys541Asn,Phe313Ser
MP2317	2017-12-07	na	na	KL-0268A	region25	Cluster4	no	G449A	Lys76Thr	CVIET	Ala220Ser,Gln271Glu,Asn326Ser,Ile356Thr,Arg371Ile	Lys541Asn,Phe313Ser
MP2183	2017-12-08	na	na	MK-11003	region25	Cluster4	no	G449A	Lys76Thr	CVIET	Ala220Ser,Gln271Glu,Asn326Ser,Ile356Thr,Arg371Ile	Lys541Asn,Phe313Ser
MP2261	2017-12-08	na	na	KL-0268A	region25	Cluster4	no	G449A	Lys76Thr	CVIET	Ala220Ser,Gln271Glu,Asn326Ser,Ile356Thr,Arg371Ile	Lys541Asn,Phe313Ser
MP2284	2017-12-08	na	na	KL-0268A	region25	Cluster4	no	G449A	Lys76Thr	CVIET	Ala220Ser,Gln271Glu,Asn326Ser,Ile356Thr,Arg371Ile	Lys541Asn,Phe313Ser
MP2346	2017-12-10	na	na	OT-0268D	region25	Cluster4	no	G449A	Lys76Thr	CVIET	Ala220Ser,Gln271Glu,Asn326Ser,Ile356Thr,Arg371Ile	Lys541Asn,Phe313Ser
MP2161	2017-12-11	2015-09-12	after	HT-0323	region30	Cluster4	no	G449A	Lys76Thr	CVIET	Ala220Ser,Gln271Glu,Asn326Ser,Ile356Thr,Arg371Ile	Lys541Asn,Phe313Ser
MP2168	2017-12-11	na	na	KL-0268A	region25	Cluster4	no	G449A	Lys76Thr	CVIET	Ala220Ser,Gln271Glu,Asn326Ser,Ile356Thr,Arg371Ile	Lys541Asn,Phe313Ser
MP2188	2017-12-11	na	na	KL-0268A	region25	Cluster4	no	G449A	Lys76Thr	CVIET	Ala220Ser,Gln271Glu,Asn326Ser,Ile356Thr,Arg371Ile	Lys541Asn,Phe313Ser
MP2447	2017-12-12	na	na	MT-11020A	region47	Cluster4	no	G449A	Lys76Thr	CVIET	Ala220Ser,Gln271Glu,Asn326Ser,Ile356Thr,Arg371Ile	Lys541Asn,Phe313Ser
MP2726	2017-12-12	na	na	ML-0380A	region24	Cluster4	no	G449A	Lys76Thr	CVIET	Ala220Ser,Gln271Glu,Asn326Ser,Ile356Thr,Arg371Ile	Lys541Asn,Phe313Ser
MP2186	2017-12-13	na	na	KL-0268E	region25	Cluster4	no	G449A	Lys76Thr	CVIET	Ala220Ser,Gln271Glu,Asn326Ser,Ile356Thr,Arg371Ile	Lys541Asn,Phe313Ser
MP2230	2017-12-13	na	na	MN-268C	region25	Cluster4	no	G449A	Lys76Thr	CVIET	Ala220Ser,Gln271Glu,Asn326Ser,Ile356Thr,Arg371Ile	Lys541Asn,Phe313Ser
MP2270	2017-12-14	na	na	HB-11007	region25	Cluster4	no	G449A	Lys76Thr	CVIET	Ala220Ser,Gln271Glu,Asn326Ser,Ile356Thr,Arg371Ile	Lys541Asn,Phe313Ser
MP2290	2017-12-15	na	na	KL-0268A	region25	Cluster4	no	G449A	Lys76Thr	CVIET	Ala220Ser,Gln271Glu,Asn326Ser,Ile356Thr,Arg371Ile	Lys541Asn,Phe313Ser
MP2292	2017-12-15	na	na	KL-0268A	region25	Cluster4	no	G449A	Lys76Thr	CVIET	Ala220Ser,Gln271Glu,Asn326Ser,Ile356Thr,Arg371Ile	Lys541Asn,Phe313Ser
MP2332	2017-12-15	2015-08-09	after	PD-0372	region35	Cluster4	no	G449A	Lys76Thr	CVIET	Ala220Ser,Gln271Glu,Asn326Ser,Ile356Thr,Arg371Ile	Lys541Asn,Phe313Ser
MP2353	2017-12-15	na	na	MK-11003	region25	Cluster4	no	G449A	Lys76Thr	CVIET	Ala220Ser,Gln271Glu,Asn326Ser,Ile356Thr,Arg371Ile	Lys541Asn,Phe313Ser
MP2521	2017-12-18	na	na	KL-0268A	region25	Cluster4	no	G449A	Lys76Thr	CVIET	Ala220Ser,Gln271Glu,Asn326Ser,Ile356Thr,Arg371Ile	Lys541Asn,Phe313Ser
MP2529	2017-12-18	na	na	MN-268C	region25	Cluster4	no	G449A	Lys76Thr	CVIET	Ala220Ser,Gln271Glu,Asn326Ser,Ile356Thr,Arg371Ile	Lys541Asn,Phe313Ser
MP2505	2017-12-19	na	na	KL-0268A	region25	Cluster4	no	G449A	Lys76Thr	CVIET	Ala220Ser,Gln271Glu,Asn326Ser,Ile356Thr,Arg371Ile	Lys541Asn,Phe313Ser
MP2525	2017-12-19	na	na	HB-11007	region25	Cluster4	no	G449A	Lys76Thr	CVIET	Ala220Ser,Gln271Glu,Asn326Ser,Ile356Thr,Arg371Ile	Lys541Asn,Phe313Ser
MP2609	2017-12-20	na	na	MK-11003	region25	Cluster4	no	G449A	Lys76Thr	CVIET	Ala220Ser,Gln271Glu,Asn326Ser,Ile356Thr,Arg371Ile	Lys541Asn,Phe313Ser
MP2666	2017-12-20	na	na	KP-0344B	region28	Cluster4	no	G449A	Lys76Thr	CVIET	Ala220Ser,Gln271Glu,Asn326Ser,Ile356Thr,Arg371Ile	Lys541Asn,Phe313Ser
MP2486	2017-12-21	na	na	KL-0268A	region25	Cluster4	no	G449A	Lys76Thr	CVIET	Ala220Ser,Gln271Glu,Asn326Ser,Ile356Thr,Arg371Ile	Lys541Asn,Phe313Ser
MP2605	2017-12-22	2015-09-12	after	HT-0323	region30	Cluster4	no	G449A.wt.mix	Lys76Thr	CVIET	Ala220Ser,Gln271Glu,Asn326Ser,Ile356Thr,Arg371Ile	Lys541Asn,Phe313Ser
MP2482	2017-12-25	na	na	KL-0268A	region25	Cluster4	no	G449A	na	na	Ala220Ser,Gln271Glu,Asn326Ser,Ile356Thr,Arg371Ile	Phe313Ser
MP2664	2017-12-25	na	na	KP-0344B	region28	Cluster4	no	G449A	Lys76Thr	CVIET	Ala220Ser,Gln271Glu,Asn326Ser,Ile356Thr,Arg371Ile	Lys541Asn,Phe313Ser
MP2671	2017-12-26	2017-06-30	after	MK-363C	region30	Cluster4	no	G449A	Lys76Thr	CVIET	Ala220Ser,Gln271Glu,Asn326Ser,Ile356Thr,Arg371Ile	Lys541Asn,Phe313Ser
MP2694	2017-12-26	na	na	HB-0269A	region25	Cluster4	no	G449A	Lys76Thr	CVIET	Ala220Ser,Gln271Glu,Asn326Ser,Ile356Thr,Arg371Ile	Lys541Asn,Phe313Ser
MP2506	2017-12-27	na	na	KL-0268A	region25	Cluster4	no	G449A	Lys76Thr	CVIET	Ala220Ser,Gln271Glu,Asn326Ser,Ile356Thr,Arg371Ile	Lys541Asn,Phe313Ser
MP2653	2018-01-02	na	na	KL-0268A	region25	Cluster4	no	G449A.wt.mix	Lys76Thr	CVIET	Ala220Ser,Gln271Glu,Asn326Ser,Ile356Thr,Arg371Ile	Lys541Asn,Phe313Ser
MP2651	2018-01-19	na	na	KP-0344B	region28	Cluster4	no	G449A	Lys76Thr	CVIET	Ala220Ser,Gln271Glu,Asn326Ser,Ile356Thr,Arg371Ile	Lys541Asn,Phe313Ser
MP2775	2018-01-23	na	na	MK-11014	region32	Cluster4	no	G449A	Lys76Thr	CVIET	Ala220Ser,Gln271Glu,Asn326Ser,Ile356Thr,Arg371Ile	Lys541Asn,Phe313Ser
MP2991	2018-01-26	na	na	MN-268C	region25	Cluster4	no	G449A	Lys76Thr	CVIET	Ala220Ser,Gln271Glu,Asn326Ser,Ile356Thr,Arg371Ile	Lys541Asn,Phe313Ser
MP2755	2018-01-28	2015-02-11	after	HM-0292	region32	Cluster4	no	G449A	Lys76Thr	CVIET	Ala220Ser,Gln271Glu,Asn326Ser,Ile356Thr,Arg371Ile	Lys541Asn,Phe313Ser
MP2997	2018-01-29	na	na	OT-0268D	region25	Cluster4	no	G449A	Lys76Thr	CVIET	Ala220Ser,Gln271Glu,Asn326Ser,Ile356Thr,Arg371Ile	Lys541Asn,Phe313Ser
MP3013	2018-01-29	na	na	KL-0268A	region25	Cluster4	no	G449A	Lys76Thr	CVIET	Ala220Ser,Gln271Glu,Asn326Ser,Ile356Thr,Arg371Ile	Lys541Asn,Phe313Ser
MP2907	2018-01-30	2016-03-14	after	PL-0327A	region30	Cluster4	no	G449A	Lys76Thr	CVIET	Ala220Ser,Gln271Glu,Asn326Ser,Ile356Thr,Arg371Ile	Lys541Asn,Phe313Ser
MP2914	2018-01-31	na	na	KL-0268A	region25	Cluster4	no	G449A	Lys76Thr	CVIET	Ala220Ser,Gln271Glu,Asn326Ser,Ile356Thr,Arg371Ile	Lys541Asn,Phe313Ser
MP3019	2018-01-31	2017-06-30	after	MK-363C	region30	Cluster4	no	G449A	Lys76Thr	CVIET	Ala220Ser,Gln271Glu,Asn326Ser,Ile356Thr,Arg371Ile	Lys541Asn,Phe313Ser
MP2892	2018-02-05	na	na	HB-0272A	region25	Cluster4	no	G449A	Lys76Thr	CVIET	Gln271Glu	Lys541Asn,Phe313Ser
MP2912	2018-02-05	2017-06-30	after	MK-363E	region30	Cluster4	no	G449A	Lys76Thr	CVIET	Ala220Ser,Gln271Glu,Asn326Ser,Ile356Thr,Arg371Ile	Lys541Asn,Phe313Ser
MP2942	2018-02-05	2017-06-30	after	MK-363E	region30	Cluster4	no	G449A	Lys76Thr	CVIET	Ala220Ser,Gln271Glu,Asn326Ser,Ile356Thr,Arg371Ile	Lys541Asn,Phe313Ser
MP2948	2018-02-07	na	na	KD-0249A	region25	Cluster4	no	G449A	Lys76Thr	CVIET	Ala220Ser,Gln271Glu,Asn326Ser,Ile356Thr,Arg371Ile	Lys541Asn,Phe313Ser
MP2762	2018-02-12	na	na	KL-0268B	region25	Cluster4	no	G449A	Lys76Thr	CVIET	Ala220Ser,Gln271Glu,Asn326Ser,Ile356Thr,Arg371Ile	Lys541Asn,Phe313Ser
MP2857	2018-02-12	na	na	OT-0268D	region25	Cluster4	no	G449A	Lys76Thr	CVIET	Ala220Ser,Gln271Glu,Asn326Ser,Ile356Thr,Arg371Ile	Lys541Asn,Phe313Ser
MP2966	2018-02-13	na	na	KP-0344B	region28	Cluster4	no	G449A	Lys76Thr	CVIET	Ala220Ser,Gln271Glu,Asn326Ser,Ile356Thr,Arg371Ile	Lys541Asn,Phe313Ser
MP2944	2018-02-14	na	na	KL-0268E	region25	Cluster4	no	G449A	Lys76Thr	CVIET	Ala220Ser,Gln271Glu,Asn326Ser,Ile356Thr,Arg371Ile	Lys541Asn,Phe313Ser
MP2817	2018-02-15	na	na	TR-11006	region25	Cluster4	YES-2018	G449A	Lys76Thr	CVIET	Ala220Ser,Gln271Glu,Asn326Ser,Ile356Thr,Arg371Ile	Lys541Asn,Phe313Ser
MP2939	2018-02-16	2016-03-14	after	PL-0327A	region30	Cluster4	no	G449A	Lys76Thr	CVIET	Ala220Ser,Gln271Glu,Asn326Ser,Ile356Thr,Arg371Ile	Lys541Asn,Phe313Ser
MP2861	2018-02-19	na	na	TR-11006	region25	Cluster4	no	G449A	Lys76Thr	CVIET	Ala220Ser,Gln271Glu,Asn326Ser,Ile356Thr,Arg371Ile	Lys541Asn,Phe313Ser
MP2920	2018-02-19	na	na	MK-11003	region25	Cluster4	no	G449A	Lys76Thr	CVIET	Ala220Ser,Gln271Glu,Asn326Ser,Ile356Thr,Arg371Ile	Lys541Asn,Phe313Ser
MP2969	2018-02-22	na	na	KL-0268A	region25	Cluster4	no	G449A	Lys76Thr	CVIET	Ala220Ser,Gln271Glu,Asn326Ser,Ile356Thr,Arg371Ile	Lys541Asn,Phe313Ser
MP3011	2018-02-24	na	na	TR-11006	region25	Cluster4	no	G449A	Lys76Thr	CVIET	Ala220Ser,Gln271Glu,Asn326Ser,Ile356Thr,Arg371Ile	Lys541Asn,Phe313Ser
MP3167	2018-04-09	na	na	KL-0268A	region25	Cluster4	no	G449A.wt.mix	Lys76Thr	CVIET	Ala220Ser,Gln271Glu,Asn326Ser,Ile356Thr,Arg371Ile	Lys541Asn,Phe313Ser
MP3330	2018-05-04	na	na	KD-0249A	region25	Cluster4	no	G449A	Lys76Thr	CVIET	Ala220Ser,Gln271Glu,Ile356Thr,Arg371Ile	Phe313Ser
MP3300	2018-05-14	na	na	TR-11006	region25	Cluster4	no	G449A	Lys76Thr	CVIET	Ala220Ser,Gln271Glu,Asn326Ser,Ile356Thr,Arg371Ile	Lys541Asn,Phe313Ser
MP3519	2018-05-28	na	na	TR-11006	region25	Cluster4	no	G449A	Lys76Thr	CVIET	Ala220Ser,Gln271Glu,Asn326Ser,Arg371Ile	Lys541Asn,Phe313Ser
MP3548	2018-05-28	na	na	KL-0268A	region25	Cluster4	no	G449A.wt.mix	Lys76Thr	CVIET	Ala220Ser,Gln271Glu,Asn326Ser,Ile356Thr	Lys541Asn,Phe313Ser
MP3539	2018-06-01	na	na	KD-0249A	region25	Cluster4	no	G449A	Lys76Thr	CVIET	Ala220Ser,Gln271Glu,Asn326Ser,Ile356Thr,Arg371Ile	Lys541Asn,Phe313Ser
MP3459	2018-06-07	na	na	KD-0249A	region25	Cluster4	no	G449A	Lys76Thr	CVIET	Ala220Ser,Gln271Glu,Asn326Ser,Ile356Thr,Arg371Ile	Lys541Asn,Phe313Ser
MP3916	2018-06-25	na	na	TR-11006	region25	Cluster4	no	G449A	Lys76Thr	CVIET	Ala220Ser,Gln271Glu,Asn326Ser,Ile356Thr,Arg371Ile	Lys541Asn,Phe313Ser
MP3993	2018-06-25	na	na	DL-262A	region25	Cluster4	no	G449A	Lys76Thr	CVIET	Ala220Ser,Gln271Glu,Asn326Ser,Ile356Thr,Arg371Ile	Lys541Asn,Phe313Ser
MP3912	2018-06-26	na	na	KL-0268A	region25	Cluster4	no	G449A	Lys76Thr	CVIET	Ala220Ser,Gln271Glu,Asn326Ser,Ile356Thr,Arg371Ile	Lys541Asn,Phe313Ser
MP3747	2018-08-31	na	na	AR-0267A	region15	Cluster4	no	G449A	Lys76Thr	CVIET	Ala220Ser,Gln271Glu,Asn326Ser,Ile356Thr,Arg371Ile	Lys541Asn,Phe313Ser
MP3756	2018-09-08	na	na	MK-11003	region25	Cluster4	no	G449A	Lys76Thr	CVIET	Ala220Ser,Gln271Glu,Asn326Ser,Ile356Thr,Arg371Ile	Lys541Asn,Phe313Ser
MP4394	2018-11-20	2015-09-07	after	BP-0321A	region23	Cluster4	no	G449A	Lys76Thr	CVIET	Ala220Ser,Gln271Glu,Asn326Ser,Ile356Thr,Arg371Ile	Lys541Asn,Phe313Ser
MP2888	NA	na	na	KP-0344B	region28	Cluster4	no	G449A	Lys76Thr	CVIET	Ala220Ser,Gln271Glu,Asn326Ser,Ile356Thr,Arg371Ile	Lys541Asn,Phe313Ser
MP0057	2016-04-07	2020-05-02	before	LH-0266A	region13	Cluster5	no	P441L	Lys76Thr	CVIET	Ala220Ser,Gln271Glu,Asn326Ser,Ile356Thr,Arg371Ile	Gly308Glu,Ser258Leu
MP0247	2016-06-15	2020-05-02	before	LH-0266A	region13	Cluster5	no	P441L	Lys76Thr	CVIET	Gln271Glu,Asn326Ser,Ile356Thr,Arg371Ile	Gly308Glu,Ser258Leu
MP0020	2016-06-18	na	na	DB-0145A	region10	Cluster5	no	P441L	Lys76Thr	CVIET	Ala220Ser,Gln271Glu,Asn326Ser,Ile356Thr,Arg371Ile	Gly308Glu,Ser258Leu
MP0025	2016-06-18	na	na	DB-0145A	region10	Cluster5	no	P441L	Lys76Thr	CVIET	Ala220Ser,Gln271Glu,Ile356Thr,Arg371Ile	Gly308Glu,Ser258Leu
MP0278	2016-06-18	na	na	HK-0208A	region12	Cluster5	no	P441L	Lys76Thr	CVIET	Ala220Ser,Gln271Glu,Asn326Ser,Ile356Thr,Arg371Ile	Gly308Glu,Ser258Leu
MP0129	2016-06-21	na	na	MT-207A	region12	Cluster5	no	P441L	Lys76Thr	CVIET	Ala220Ser,Gln271Glu,Asn326Ser,Ile356Thr,Arg371Ile	Gly308Glu,Ser258Leu
MP0170	2016-06-21	na	na	KN-0217A	region15	Cluster5	no	P441L	Lys76Thr	CVIET	Ala220Ser,Gln271Glu,Asn326Ser,Ile356Thr,Arg371Ile	Gly308Glu,Ser258Leu
MP0191	2016-06-21	na	na	HL-0221A	region15	Cluster5	no	P441L	Lys76Thr	CVIET	Ala220Ser,Gln271Glu,Asn326Ser,Ile356Thr,Arg371Ile	Gly308Glu,Ser258Leu
MP0188	2016-06-22	na	na	HL-0221A	region15	Cluster5	YES-2016	P441L	Lys76Thr	CVIET	Ala220Ser,Gln271Glu,Asn326Ser,Ile356Thr,Arg371Ile	Gly308Glu,Ser258Leu
MP0190	2016-06-24	na	na	DP-0227A	region15	Cluster5	no	P441L	Lys76Thr	CVIET	Ala220Ser,Gln271Glu,Asn326Ser,Ile356Thr,Arg371Ile	Gly308Glu,Ser258Leu
MP0210	2016-06-28	2016-09-02	before	MG-0261A	region11	Cluster5	no	P441L	Lys76Thr	CVIET	Ala220Ser,Gln271Glu,Asn326Ser,Ile356Thr,Arg371Ile	Gly308Glu,Ser258Leu
MP0066	2016-07-14	2016-09-02	before	MG-0261A	region11	Cluster5	no	P441L	Lys76Thr	CVIET	Ala220Ser,Gln271Glu,Asn326Ser,Ile356Thr,Arg371Ile	Gly308Glu,Ser258Leu
MP0119	2016-07-16	2016-09-02	before	MG-0261A	region11	Cluster5	no	P441L	Lys76Thr	CVIET	Ala220Ser,Gln271Glu,Asn326Ser,Ile356Thr,Arg371Ile	Gly308Glu,Ser258Leu
MP0322	2016-08-09	na	na	HL-0221A	region15	Cluster5	no	P441L	Lys76Thr	CVIET	Gln271Glu,Asn326Ser,Ile356Thr,Arg371Ile	Gly308Glu,Ser258Leu
MP0309	2016-08-18	na	na	LN-163B	region10	Cluster5	no	P441L	Lys76Thr	CVIET	Ala220Ser,Gln271Glu,Asn326Ser,Ile356Thr,Arg371Ile	Gly308Glu,Ser258Leu
MP0633	2016-12-21	na	na	MW-0176	region12	Cluster5	no	P441L	Lys76Thr	CVIET	Gln271Glu,Asn326Ser,Ile356Thr,Arg371Ile	Gly308Glu,Ser258Leu
MP0560	2016-12-28	na	na	DB-0145B	region10	Cluster5	no	P441L	Lys76Thr	CVIET	Gln271Glu,Asn326Ser,Ile356Thr,Arg371Ile	Gly308Glu,Ser258Leu
MP0573	2017-01-04	na	na	DB-0145B	region10	Cluster5	YES-2017	P441L	Lys76Thr	CVIET	Ala220Ser,Gln271Glu,Asn326Ser,Ile356Thr,Arg371Ile	Gly308Glu,Ser258Leu
MP0602	2017-01-05	2015-09-12	after	LN-0163A	region10	Cluster5	no	P441L	Lys76Thr	CVIET	Ala220Ser,Gln271Glu,Asn326Ser,Ile356Thr,Arg371Ile	Gly308Glu,Ser258Leu
MP0587	2017-01-08	na	na	WM-0144	region10	Cluster5	no	P441L	Lys76Thr	CVIET	Ala220Ser,Gln271Glu,Asn326Ser,Ile356Thr,Arg371Ile	Gly308Glu,Ser258Leu
METF.HRP.14	2017-01-13	na	na	NL-0220	region11	Cluster5	no	P441L	Lys76Thr	CVIET	Ala220Ser,Gln271Glu,Asn326Ser,Ile356Thr,Arg371Ile	Gly308Glu,Ser258Leu
MP0971	2017-01-27	na	na	NH-0402A	region24	Cluster5	no	P441L	Lys76Thr	CVIET	Ala220Ser,Gln271Glu,Asn326Ser,Ile356Thr,Arg371Ile	Gly308Glu,Ser258Leu
MP0876	2017-02-07	na	na	CK-11052A	region14	Cluster5	no	P441L	Lys76Thr	CVIET	Ala220Ser,Gln271Glu,Asn326Ser,Ile356Thr,Arg371Ile	Gly308Glu,Ser258Leu
MP0732	2017-02-09	na	na	TK-183A	region12	Cluster5	no	P441L	Lys76Thr	CVIET	Ala220Ser,Gln271Glu,Asn326Ser,Ile356Thr,Arg371Ile	Gly308Glu,Ser258Leu
MP0768	2017-02-09	na	na	WM-0416B	region24	Cluster5	no	P441L	Lys76Thr	CVIET	Ala220Ser,Gln271Glu,Asn326Ser,Ile356Thr,Arg371Ile	Gly308Glu,Ser258Leu
MP0780	2017-02-13	na	na	DL-0187B	region12	Cluster5	no	P441L	Lys76Thr	CVIET	Ala220Ser,Gln271Glu,Asn326Ser,Ile356Thr,Arg371Ile	Gly308Glu,Ser258Leu
MP0859	2017-02-14	2020-05-02	before	LH-0266B	region13	Cluster5	no	P441L	Lys76Thr	CVIET	Ala220Ser,Gln271Glu,Ile356Thr,Arg371Ile	Gly308Glu,Ser258Leu
MP0756	2017-02-24	2015-08-09	after	DL-0187A	region12	Cluster5	no	P441L	Lys76Thr	CVIET	Ala220Ser,Gln271Glu,Asn326Ser,Ile356Thr,Arg371Ile	Gly308Glu,Ser258Leu
MP0951	2017-03-09	na	na	KK-11032	region1	Cluster5	no	P441L	Lys76Thr	CVIET	Ala220Ser,Gln271Glu,Asn326Ser,Ile356Thr,Arg371Ile	Gly308Glu,Ser258Leu
MP0956	2017-03-09	na	na	CK-11052A	region14	Cluster5	no	P441L	Lys76Thr	CVIET	Ala220Ser,Gln271Glu,Asn326Ser,Ile356Thr,Arg371Ile	Gly308Glu,Ser258Leu
MP0953	2017-03-14	na	na	TM-0308	region14	Cluster5	no	P441L	Lys76Thr	CVIET	Ala220Ser,Gln271Glu,Asn326Ser,Ile356Thr,Arg371Ile	Gly308Glu,Ser258Leu
MP0975	2017-03-15	na	na	CK-11052A	region14	Cluster5	no	P441L	Lys76Thr	CVIET	Asn326Ser,Ile356Thr,Arg371Ile	Gly308Glu,Ser258Leu
MP0947	2017-03-16	na	na	PP-11050A	region14	Cluster5	no	P441L	Lys76Thr	CVIET	Ala220Ser,Gln271Glu,Asn326Ser,Ile356Thr,Arg371Ile	Gly308Glu,Ser258Leu
MP0959	2017-03-22	na	na	PP-11050A	region14	Cluster5	no	P441L	Lys76Thr	CVIET	Ala220Ser,Gln271Glu,Asn326Ser,Ile356Thr,Arg371Ile	Gly308Glu,Ser258Leu
MP1182	2017-05-09	na	na	TM-0308	region14	Cluster5	no	P441L	Lys76Thr	CVIET	Ala220Ser,Gln271Glu,Asn326Ser,Ile356Thr,Arg371Ile	Gly308Glu,Ser258Leu
MP1149	2017-05-15	na	na	TM-0308	region14	Cluster5	no	P441L	Lys76Thr	CVIET	Ala220Ser,Gln271Glu,Asn326Ser,Ile356Thr,Arg371Ile	Ser258Leu
MP1191	2017-05-15	na	na	TM-0308	region14	Cluster5	no	P441L	Lys76Thr	CVIET	Ala220Ser,Gln271Glu,Asn326Ser,Ile356Thr,Arg371Ile	Gly308Glu,Ser258Leu
MP1195	2017-05-15	na	na	CK-11052A	region14	Cluster5	no	P441L	Lys76Thr	CVIET	Ala220Ser,Gln271Glu,Asn326Ser,Ile356Thr,Arg371Ile	Gly308Glu,Ser258Leu
MP1199	2017-05-15	na	na	TM-0308	region14	Cluster5	no	P441L	Lys76Thr	CVIET	Ala220Ser,Gln271Glu,Asn326Ser,Ile356Thr,Arg371Ile	Gly308Glu,Ser258Leu
MP1244	2017-05-15	na	na	TM-0308	region14	Cluster5	no	P441L	Lys76Thr	CVIET	Ala220Ser,Gln271Glu,Ile356Thr,Arg371Ile	Gly308Glu,Ser258Leu
MP1144	2017-05-16	na	na	KK-11032	region1	Cluster5	no	P441L	Lys76Thr	CVIET	Ala220Ser,Gln271Glu,Asn326Ser,Ile356Thr,Arg371Ile	Gly308Glu,Ser258Leu
MP1521	2017-05-21	na	na	MK-0265	region32	Cluster5	no	P441L	Lys76Thr	CVIET	Ala220Ser,Gln271Glu,Asn326Ser,Ile356Thr,Arg371Ile	Gly308Glu,Ser258Leu
MP1524	2017-05-22	2016-09-03	after	WT-0314A	region14	Cluster5	no	P441L	Lys76Thr	CVIET	Ala220Ser,Gln271Glu,Asn326Ser,Ile356Thr,Arg371Ile	Gly308Glu,Ser258Leu
MP1403	2017-06-05	2015-08-11	after	HW-0184	region22	Cluster5	no	P441L	Lys76Thr	CVIET	Ala220Ser,Gln271Glu,Asn326Ser,Ile356Thr,Arg371Ile	Gly308Glu,Ser258Leu
MP1268	2017-06-07	na	na	PP-11050A	region14	Cluster5	no	P441L	Lys76Thr	CVIET	Ala220Ser,Ile356Thr	Gly308Glu,Ser258Leu
MP1943	2017-06-08	2016-08-31	after	PL-0366	region26	Cluster5	no	P441L	Lys76Thr	CVIET	Ala220Ser,Gln271Glu,Asn326Ser,Ile356Thr,Arg371Ile	Gly308Glu,Ser258Leu
MP1266	2017-06-12	na	na	PP-11050A	region14	Cluster5	no	P441L	Lys76Thr	CVIET	Ala220Ser,Gln271Glu,Asn326Ser,Ile356Thr,Arg371Ile	Gly308Glu,Ser258Leu
MP1319	2017-06-21	2016-09-03	after	WT-0314A	region14	Cluster5	no	P441L	Lys76Thr	CVIET	Ala220Ser,Gln271Glu,Asn326Ser,Ile356Thr,Arg371Ile	Gly308Glu,Ser258Leu
MP1409	2017-06-23	2016-03-18	after	KW-0301A	region14	Cluster5	no	P441L	Lys76Thr	CVIET	Ala220Ser,Gln271Glu,Asn326Ser,Ile356Thr,Arg371Ile	Gly308Glu,Ser258Leu
MP1715	2017-06-27	na	na	MK-0265	region32	Cluster5	no	P441L	Lys76Thr	CVIET	Ala220Ser,Gln271Glu,Asn326Ser,Ile356Thr,Arg371Ile	Gly308Glu,Ser258Leu
MP1692	2017-07-03	na	na	CK-11052A	region14	Cluster5	no	P441L.wt.mix	Lys76Thr	CVIET	Ile356Thr	Gly308Glu,Ser258Leu
MP1703	2017-07-06	2016-08-31	after	PL-0366	region26	Cluster5	no	P441L	Lys76Thr	CVIET	Ala220Ser,Gln271Glu,Ile356Thr,Arg371Ile	Gly308Glu,Ser258Leu
MP1917	2017-09-19	na	na	MK-0265	region32	Cluster5	no	P441L	Lys76Thr	CVIET	Ala220Ser,Gln271Glu,Asn326Ser,Ile356Thr,Arg371Ile	Gly308Glu,Ser258Leu
MP1828	2017-10-03	na	na	MG-0261B	region11	Cluster5	no	P441L	Lys76Thr	CVIET	Ala220Ser,Gln271Glu,Asn326Ser,Ile356Thr,Arg371Ile	Gly308Glu,Ser258Leu
MP1978	2017-10-23	na	na	MK-0265	region32	Cluster5	no	P441L	Lys76Thr	CVIET	Ala220Ser,Gln271Glu,Asn326Ser,Ile356Thr,Arg371Ile	Gly308Glu,Ser258Leu
MP2039	2017-10-23	na	na	PP-11050A	region14	Cluster5	no	P441L	Lys76Thr	CVIET	Ala220Ser,Gln271Glu,Asn326Ser,Ile356Thr,Arg371Ile	Gly308Glu,Ser258Leu
MP2038	2017-11-07	na	na	MK-0265	region32	Cluster5	no	P441L	Lys76Thr	CVIET	Ala220Ser,Gln271Glu,Asn326Ser,Ile356Thr,Arg371Ile	Gly308Glu,Ser258Leu
MP2187	2017-11-27	na	na	MK-0265	region32	Cluster5	no	P441L	Lys76Thr	CVIET	Ala220Ser,Gln271Glu,Asn326Ser,Ile356Thr,Arg371Ile	Gly308Glu,Ser258Leu
MP2702	2017-12-11	2016-03-18	after	KW-0301A	region14	Cluster5	no	P441L	Lys76Thr	CVIET	Ala220Ser,Gln271Glu,Asn326Ser,Ile356Thr,Arg371Ile	Gly308Glu,Ser258Leu
MP2722	2018-01-01	na	na	MK-0265	region32	Cluster5	no	P441L	Lys76Thr	CVIET	Ala220Ser,Gln271Glu,Asn326Ser,Arg371Ile	Gly308Glu,Ser258Leu
MP2732	2018-01-09	na	na	KW-11056A	region14	Cluster5	no	P441L	Lys76Thr	CVIET	Ala220Ser,Gln271Glu,Asn326Ser,Ile356Thr,Arg371Ile	Gly308Glu,Ser258Leu
MP2781	2018-01-24	2016-03-18	after	KW-0301A	region14	Cluster5	no	P441L	Lys76Thr	CVIET	Ala220Ser,Gln271Glu,Asn326Ser,Ile356Thr,Arg371Ile	Gly308Glu,Ser258Leu
MP2820	2018-01-24	na	na	MK-0265	region32	Cluster5	no	P441L	Lys76Thr	CVIET	Ala220Ser,Gln271Glu,Asn326Ser,Ile356Thr,Arg371Ile	Gly308Glu,Ser258Leu
MP2827	2018-01-25	na	na	TO-11005	region6	Cluster5	YES-2018	P441L	Lys76Thr	CVIET	Ala220Ser,Gln271Glu,Asn326Ser,Ile356Thr,Arg371Ile	Gly308Glu,Ser258Leu
MP2918	2018-01-29	na	na	MK-0265	region32	Cluster5	no	P441L	Lys76Thr	CVIET	Ala220Ser,Gln271Glu,Asn326Ser,Ile356Thr,Arg371Ile	Gly308Glu,Ser258Leu
MP2949	2018-02-03	na	na	MK-0265	region32	Cluster5	no	P441L	Lys76Thr	CVIET	Ala220Ser,Gln271Glu,Asn326Ser,Ile356Thr,Arg371Ile	Gly308Glu,Ser258Leu
MP2927	2018-02-06	na	na	MK-0265	region32	Cluster5	no	P441L	Lys76Thr	CVIET	Ala220Ser,Gln271Glu,Asn326Ser,Ile356Thr,Arg371Ile	Gly308Glu,Ser258Leu
MP2777	2018-02-14	na	na	MK-0265	region32	Cluster5	no	P441L	Lys76Thr	CVIET	Ala220Ser,Gln271Glu,Asn326Ser,Ile356Thr,Arg371Ile	na
MP3075	2018-04-09	na	na	WL-0104A	region7	Cluster5	no	P441L	Lys76Thr	CVIET	Ala220Ser	Gly308Glu,Ser258Leu
MP1360	2017-06-11	na	na	PB-0275	region15	Cluster6	no	WT	Lys76Thr	CVIET	Ala220Ser,Gln271Glu,Asn326Ser,Ile356Thr,Arg371Ile	Phe313Ser
MP1377	2017-07-26	2020-05-02	before	LH-0266B	region13	Cluster6	no	WT	Lys76Thr	CVIET	Ala220Ser,Gln271Glu,Asn326Ser,Ile356Thr,Arg371Ile	Lys541Asn,Phe313Ser
MP2364	2017-09-05	na	na	DP-0227A	region15	Cluster6	no	WT	Lys76Thr	CVIET	Ala220Ser,Gln271Glu,Asn326Ser,Ile356Thr,Arg371Ile	Lys541Asn,Phe313Ser
MP2363	2017-09-11	na	na	DP-0227A	region15	Cluster6	no	WT	Lys76Thr	CVIET	Ala220Ser,Gln271Glu,Asn326Ser,Ile356Thr,Arg371Ile	Lys541Asn,Phe313Ser
MP1902	2017-09-20	na	na	NN-0291A	region17	Cluster6	no	WT	Lys76Thr	CVIET	Ala220Ser,Gln271Glu,Asn326Ser,Ile356Thr,Arg371Ile	Lys541Asn,Phe313Ser
MP1831	2017-09-22	na	na	MK-11047	region17	Cluster6	no	WT	Lys76Thr	CVIET	Ala220Ser,Gln271Glu,Asn326Ser,Ile356Thr,Arg371Ile	Lys541Asn,Phe313Ser
MP1900	2017-09-22	na	na	DP-0227A	region15	Cluster6	no	WT	Lys76Thr	CVIET	Ala220Ser,Gln271Glu,Asn326Ser,Ile356Thr,Arg371Ile	Lys541Asn,Phe313Ser
MP1853	2017-09-25	na	na	TM-298C	region23	Cluster6	no	NA	Lys76Thr	CVIET	Ala220Ser,Gln271Glu,Asn326Ser,Ile356Thr,Arg371Ile	Lys541Asn,Phe313Ser
MP1856	2017-09-26	na	na	TG-250A	region15	Cluster6	no	WT	Lys76Thr	CVIET	Ala220Ser,Gln271Glu,Asn326Ser,Ile356Thr,Arg371Ile	Lys541Asn,Phe313Ser
MP1901	2017-09-26	na	na	DP-0227A	region15	Cluster6	no	WT	Lys76Thr	CVIET	Ala220Ser,Gln271Glu,Asn326Ser,Ile356Thr,Arg371Ile	Lys541Asn,Phe313Ser
MP1862	2017-09-27	na	na	DP-0227A	region15	Cluster6	no	NA	Lys76Thr	CVIET	Ala220Ser,Gln271Glu,Asn326Ser,Ile356Thr,Arg371Ile	Lys541Asn,Phe313Ser
MP1855	2017-09-28	na	na	DP-0227A	region15	Cluster6	no	WT	Lys76Thr	CVIET	Ala220Ser,Gln271Glu,Asn326Ser,Ile356Thr,Arg371Ile	Lys541Asn,Phe313Ser
MP1839	2017-09-29	na	na	NN-0291A	region17	Cluster6	no	WT	Lys76Thr	CVIET	Ala220Ser,Gln271Glu,Asn326Ser,Ile356Thr,Arg371Ile	Lys541Asn,Phe313Ser
MP1840	2017-09-29	na	na	MK-11047	region17	Cluster6	no	WT	Lys76Thr	CVIET	Ala220Ser,Gln271Glu,Asn326Ser,Ile356Thr,Arg371Ile	Lys541Asn,Phe313Ser
MP2031	2017-11-08	na	na	DB-0145B	region10	Cluster6	no	WT	Lys76Thr	CVIET	Ala220Ser,Gln271Glu,Asn326Ser,Ile356Thr,Arg371Ile	Lys541Asn,Phe313Ser
MP2055	2017-11-08	na	na	HL-0221A	region15	Cluster6	no	WT	Lys76Thr	CVIET	Ala220Ser,Gln271Glu,Asn326Ser,Ile356Thr,Arg371Ile	Phe313Ser
MP2077	2017-11-13	na	na	KN-0293A	region17	Cluster6	no	WT	Lys76Thr	CVIET	Ala220Ser,Gln271Glu,Asn326Ser,Ile356Thr,Arg371Ile	Lys541Asn,Phe313Ser
MP1999	2017-11-21	2016-08-31	after	PL-0366	region26	Cluster6	no	WT	Lys76Thr	CVIET	Ala220Ser,Gln271Glu,Asn326Ser,Ile356Thr,Arg371Ile	Lys541Asn,Phe313Ser
MP2029	2017-11-21	na	na	HL-0221A	region15	Cluster6	no	WT	Lys76Thr	CVIET	Ala220Ser,Gln271Glu,Asn326Ser,Ile356Thr,Arg371Ile	Lys541Asn,Phe313Ser
MP2002	2017-11-22	na	na	HK-0277A	region17	Cluster6	no	WT	Lys76Thr	CVIET	Ala220Ser,Gln271Glu,Asn326Ser,Ile356Thr,Arg371Ile	Lys541Asn,Phe313Ser
MP2001	2017-11-23	na	na	DP-0227A	region15	Cluster6	no	WT	Lys76Thr	CVIET	Ala220Ser,Gln271Glu,Asn326Ser,Ile356Thr,Arg371Ile	Lys541Asn,Phe313Ser
MP2007	2017-11-24	na	na	DP-0227A	region15	Cluster6	no	WT	Lys76Thr	CVIET	Ala220Ser,Gln271Glu,Asn326Ser,Ile356Thr,Arg371Ile	Lys541Asn,Phe313Ser
MP2006	2017-11-25	na	na	DP-0227A	region15	Cluster6	no	WT	Lys76Thr	CVIET	Ala220Ser,Gln271Glu,Asn326Ser,Ile356Thr,Arg371Ile	Lys541Asn,Phe313Ser
MP2297	2017-11-27	na	na	DP-0227A	region15	Cluster6	no	WT	Lys76Thr	CVIET	Gln271Glu,Asn326Ser,Arg371Ile	Lys541Asn,Phe313Ser
MP2216	2017-11-29	na	na	HL-0221A	region15	Cluster6	no	WT	Lys76Thr	CVIET	Ala220Ser,Gln271Glu,Asn326Ser,Ile356Thr,Arg371Ile	Lys541Asn,Phe313Ser
MP2295	2017-12-02	na	na	DP-0227A	region15	Cluster6	no	WT	Lys76Thr	CVIET	Ala220Ser,Gln271Glu,Asn326Ser,Ile356Thr,Arg371Ile	na
MP2293	2017-12-05	na	na	NB-11054A	region19	Cluster6	no	WT	Lys76Thr	CVIET	Ala220Ser,Gln271Glu,Asn326Ser,Ile356Thr,Arg371Ile	Lys541Asn,Phe313Ser
MP2189	2017-12-08	2020-05-02	before	LH-0266B	region13	Cluster6	no	WT	Lys76Thr	CVIET	Ala220Ser,Gln271Glu,Asn326Ser,Ile356Thr,Arg371Ile	Lys541Asn,Phe313Ser
MP2429	2017-12-12	2020-05-02	before	LH-0266B	region13	Cluster6	no	WT	Lys76Thr	CVIET	Ala220Ser,Gln271Glu,Asn326Ser,Ile356Thr,Arg371Ile	Lys541Asn,Phe313Ser
MP2520	2017-12-12	na	na	DP-0227A	region15	Cluster6	no	WT	Lys76Thr	CVIET	Ala220Ser,Gln271Glu,Asn326Ser,Ile356Thr,Arg371Ile	Lys541Asn,Phe313Ser
MP2698	2017-12-12	na	na	DP-0227A	region15	Cluster6	no	WT	Lys76Thr	CVIET	Gln271Glu,Asn326Ser,Ile356Thr,Arg371Ile	Lys541Asn,Phe313Ser
MP2580	2017-12-14	2020-05-02	before	LH-0266B	region13	Cluster6	no	WT	Lys76Thr	CVIET	Ala220Ser,Gln271Glu,Asn326Ser,Ile356Thr,Arg371Ile	Lys541Asn,Phe313Ser
MP2423	2017-12-19	2020-05-02	before	LH-0266A	region13	Cluster6	no	WT	Lys76Thr	CVIET	Ala220Ser,Gln271Glu,Asn326Ser,Ile356Thr,Arg371Ile	Lys541Asn,Phe313Ser
MP2463	2017-12-19	2020-05-02	before	LH-0266A	region13	Cluster6	no	WT	Lys76Thr	CVIET	Ala220Ser,Gln271Glu,Asn326Ser,Ile356Thr,Arg371Ile	Lys541Asn,Phe313Ser
MP2646	2017-12-20	na	na	PP-0240	region15	Cluster6	no	WT	Lys76Thr	CVIET	Ala220Ser,Gln271Glu,Asn326Ser,Ile356Thr,Arg371Ile	Lys541Asn,Phe313Ser
MP2397	2017-12-25	2016-03-14	after	MK-0288A	region13	Cluster6	YES-2017	WT	Lys76Thr	CVIET	Ala220Ser,Gln271Glu,Asn326Ser,Ile356Thr,Arg371Ile	Lys541Asn,Phe313Ser
MP2405	2017-12-28	2020-05-02	before	LH-0266B	region13	Cluster6	no	WT	Lys76Thr	CVIET	Ala220Ser,Gln271Glu,Asn326Ser,Ile356Thr,Arg371Ile	Lys541Asn,Phe313Ser
MP2508	2017-12-30	na	na	HB-11007	region25	Cluster6	no	WT	Lys76Thr	CVIET	Ala220Ser,Gln271Glu,Asn326Ser,Ile356Thr,Arg371Ile	Lys541Asn,Phe313Ser
MP2442	2018-01-01	2016-03-18	after	DH-0315A	region21	Cluster6	no	WT	Lys76Thr	CVIET	Ala220Ser,Gln271Glu,Asn326Ser,Ile356Thr,Arg371Ile	Phe313Ser
MP2474	2018-01-09	na	na	DP-0227A	region15	Cluster6	no	WT	Lys76Thr	CVIET	Ala220Ser,Gln271Glu,Asn326Ser,Ile356Thr,Arg371Ile	Lys541Asn,Phe313Ser
MP2454	2018-01-11	na	na	NB-11054A	region19	Cluster6	no	WT	Lys76Thr	CVIET	Ala220Ser,Gln271Glu,Asn326Ser,Ile356Thr,Arg371Ile	Lys541Asn,Phe313Ser
MP2430	2018-01-12	na	na	PN-11048	region21	Cluster6	no	WT	Lys76Thr	CVIET	Ala220Ser,Gln271Glu,Asn326Ser,Ile356Thr,Arg371Ile	Lys541Asn,Phe313Ser
MP2421	2018-01-15	na	na	HK-0277A	region17	Cluster6	no	WT	Lys76Thr	CVIET	Ala220Ser,Gln271Glu,Asn326Ser,Ile356Thr,Arg371Ile	Lys541Asn,Phe313Ser
MP2439	2018-01-15	na	na	HK-0277A	region17	Cluster6	no	WT	Lys76Thr	CVIET	Ala220Ser,Gln271Glu,Asn326Ser,Ile356Thr,Arg371Ile	Lys541Asn,Phe313Ser
MP2470	2018-01-16	na	na	TG-250A	region15	Cluster6	no	WT	Lys76Thr	CVIET	Ala220Ser,Gln271Glu,Asn326Ser,Ile356Thr,Arg371Ile	Lys541Asn,Phe313Ser
MP2402	2018-01-17	na	na	DL-262B	region14	Cluster6	no	WT	Lys76Thr	CVIET	Ala220Ser,Gln271Glu,Asn326Ser,Ile356Thr,Arg371Ile	Lys541Asn,Phe313Ser
MP2424	2018-01-17	na	na	NN-0287A	region17	Cluster6	no	WT	Lys76Thr	CVIET	Ala220Ser,Gln271Glu,Asn326Ser,Ile356Thr,Arg371Ile	Lys541Asn,Phe313Ser
MP2727	2018-01-19	2016-09-03	after	WT-0314A	region14	Cluster6	no	WT	Lys76Thr	CVIET	Ala220Ser,Gln271Glu,Asn326Ser,Ile356Thr,Arg371Ile	Lys541Asn,Phe313Ser
MP2786	2018-01-22	na	na	TG-250A	region15	Cluster6	no	WT	Lys76Thr	CVIET	Ala220Ser,Gln271Glu,Asn326Ser,Ile356Thr,Arg371Ile	Lys541Asn,Phe313Ser
MP2790	2018-01-22	na	na	TG-250A	region15	Cluster6	no	WT	Lys76Thr	CVIET	Ala220Ser,Gln271Glu,Asn326Ser,Ile356Thr,Arg371Ile	Lys541Asn,Phe313Ser
MP2875	2018-01-22	2016-09-03	after	WT-0314A	region14	Cluster6	no	WT	Lys76Thr	CVIET	Ala220Ser,Gln271Glu,Asn326Ser,Ile356Thr,Arg371Ile	Lys541Asn,Phe313Ser
MP2883	2018-01-22	na	na	PD-11057A	region14	Cluster6	no	NA	Lys76Thr	CVIET	Ala220Ser	Lys541Asn,Phe313Ser
MP2838	2018-01-25	na	na	NB-11054A	region19	Cluster6	no	WT	Lys76Thr	CVIET	Ala220Ser,Gln271Glu,Asn326Ser,Ile356Thr,Arg371Ile	Lys541Asn,Phe313Ser
MP2906	2018-01-25	na	na	MC-0393B	region24	Cluster6	no	WT	Lys76Thr	CVIET	Ala220Ser,Gln271Glu,Asn326Ser,Ile356Thr,Arg371Ile	Lys541Asn,Phe313Ser
MP2908	2018-01-25	na	na	NB-11051A	region19	Cluster6	no	NA	Lys76Thr	CVIET	Ala220Ser,Gln271Glu,Asn326Ser,Ile356Thr,Arg371Ile	Lys541Asn,Phe313Ser
MP3006	2018-01-25	na	na	HL-0221A	region15	Cluster6	no	WT	Lys76Thr	CVIET	Ala220Ser,Gln271Glu,Asn326Ser,Ile356Thr,Arg371Ile	Lys541Asn,Phe313Ser
MP2849	2018-01-30	na	na	AR-0267A	region15	Cluster6	no	WT	Lys76Thr	CVIET	Ala220Ser,Gln271Glu,Asn326Ser,Ile356Thr,Arg371Ile	Lys541Asn,Phe313Ser
MP3001	2018-02-01	na	na	DB-0239A	region15	Cluster6	no	WT	Lys76Thr	CVIET	Ala220Ser,Gln271Glu,Asn326Ser,Ile356Thr,Arg371Ile	Lys541Asn,Phe313Ser
MP2793	2018-02-06	na	na	NB-11054A	region19	Cluster6	no	WT	Lys76Thr	CVIET	Ala220Ser,Gln271Glu,Asn326Ser,Ile356Thr,Arg371Ile	Lys541Asn,Phe313Ser
MP2848	2018-02-12	na	na	NB-11054A	region19	Cluster6	YES-2018	WT	Lys76Thr	CVIET	Ala220Ser,Gln271Glu,Asn326Ser,Ile356Thr,Arg371Ile	Lys541Asn,Phe313Ser
MP3029	2018-02-12	na	na	TG-250A	region15	Cluster6	no	WT	Lys76Thr	CVIET	Ala220Ser,Gln271Glu,Asn326Ser,Ile356Thr,Arg371Ile	Lys541Asn,Phe313Ser
MP3018	2018-02-14	na	na	TG-250A	region15	Cluster6	no	WT	Lys76Thr	CVIET	Ala220Ser,Gln271Glu,Asn326Ser,Ile356Thr,Arg371Ile	Lys541Asn,Phe313Ser
MP2854	2018-02-19	na	na	KN-0293A	region17	Cluster6	no	WT	Lys76Thr	CVIET	Ala220Ser,Gln271Glu,Asn326Ser,Ile356Thr,Arg371Ile	Lys541Asn,Phe313Ser
MP2774	2018-02-22	na	na	AR-0264	region15	Cluster6	no	WT	Lys76Thr	CVIET	Ala220Ser,Gln271Glu,Asn326Ser,Ile356Thr,Arg371Ile	Lys541Asn,Phe313Ser
MP3089	2018-03-12	na	na	MK-11047	region17	Cluster6	no	WT	Lys76Thr	CVIET	Ala220Ser,Gln271Glu,Asn326Ser,Ile356Thr,Arg371Ile	Lys541Asn,Phe313Ser
MP3178	2018-04-09	2016-03-13	after	KK-0206	region22	Cluster6	no	WT	Lys76Thr	CVIET	Ala220Ser,Gln271Glu,Asn326Ser,Ile356Thr,Arg371Ile	Lys541Asn,Phe313Ser
MP3656	2018-05-21	na	na	DB-0239A	region15	Cluster6	no	WT	Lys76Thr	CVIET	Ala220Ser,Gln271Glu,Asn326Ser,Ile356Thr,Arg371Ile	Lys541Asn,Phe313Ser
MP3518	2018-05-23	na	na	PB-0275	region15	Cluster6	no	WT	Lys76Thr	CVIET	Ala220Ser,Gln271Glu,Asn326Ser,Arg371Ile	Lys541Asn,Phe313Ser
MP4229	2018-12-05	2016-03-13	after	KK-0206	region22	Cluster6	no	WT	Lys76Thr	CVIET	Ala220Ser,Gln271Glu,Asn326Ser,Ile356Thr,Arg371Ile	Lys541Asn,Phe313Ser
MP0147	2016-02-07	na	na	KB-0148	region10	Cluster7	no	WT	Lys76Thr	CVIET	Ala220Ser,Gln271Glu,Asn326Ser,Ile356Thr,Arg371Ile	Lys541Asn,Phe313Ser
MP0045	2016-04-05	2015-08-09	after	DL-0187A	region12	Cluster7	no	WT	Lys76Thr	CVIET	Ala220Ser,Gln271Glu,Asn326Ser,Ile356Thr,Arg371Ile	Lys541Asn,Phe313Ser
MP0046	2016-04-24	na	na	DB-0145A	region10	Cluster7	no	WT	Lys76Thr	CVIET	Ala220Ser,Gln271Glu,Asn326Ser,Ile356Thr,Arg371Ile	Lys541Asn,Phe313Ser
MP0113	2016-05-07	na	na	HK-0277A	region17	Cluster7	no	WT	Lys76Thr	CVIET	Ala220Ser,Gln271Glu,Asn326Ser,Ile356Thr,Arg371Ile	Lys541Asn,Phe313Ser
MP0058	2016-06-07	na	na	PL-0175	region12	Cluster7	no	WT	Lys76Thr	CVIET	Ala220Ser,Gln271Glu,Asn326Ser,Ile356Thr,Arg371Ile	Lys541Asn,Phe313Ser
MP0011	2016-06-15	2015-08-09	after	DL-0187A	region12	Cluster7	no	WT	Lys76Thr	CVIET	Ala220Ser,Gln271Glu,Asn326Ser,Ile356Thr,Arg371Ile	Lys541Asn,Phe313Ser
MP0128	2016-06-15	na	na	MT-207A	region12	Cluster7	no	WT	Lys76Thr	CVIET	Ala220Ser,Gln271Glu,Asn326Ser,Ile356Thr,Arg371Ile	Lys541Asn,Phe313Ser
MP0018	2016-06-16	na	na	MW-0176	region12	Cluster7	no	WT	Lys76Thr	CVIET	Ala220Ser,Gln271Glu,Asn326Ser,Ile356Thr,Arg371Ile	Lys541Asn,Phe313Ser
MP0010	2016-06-17	2015-08-07	after	TK-151A	region10	Cluster7	no	WT	Lys76Thr	CVIET	Ala220Ser,Gln271Glu,Asn326Ser,Ile356Thr	Lys541Asn,Phe313Ser
MP0056	2016-06-20	na	na	MW-0176	region12	Cluster7	YES-2016	WT	Lys76Thr	CVIET	Ala220Ser,Gln271Glu,Asn326Ser,Ile356Thr,Arg371Ile	Lys541Asn,Phe313Ser
MP0166	2016-06-20	na	na	HL-11001	region10	Cluster7	no	WT	Lys76Thr	CVIET	Ala220Ser,Gln271Glu,Asn326Ser,Ile356Thr,Arg371Ile	Lys541Asn,Phe313Ser
MP0199	2016-06-20	na	na	HL-11001	region10	Cluster7	no	WT	Lys76Thr	CVIET	Ala220Ser,Gln271Glu,Asn326Ser,Ile356Thr,Arg371Ile	Lys541Asn,Phe313Ser
MP0110	2016-06-21	na	na	HL-11001	region10	Cluster7	no	WT	Lys76Thr	CVIET	Ala220Ser,Gln271Glu,Asn326Ser,Ile356Thr,Arg371Ile	Lys541Asn,Phe313Ser
MP0121	2016-06-22	na	na	MW-0176	region12	Cluster7	no	WT	Lys76Thr	CVIET	Ala220Ser,Gln271Glu,Asn326Ser,Ile356Thr	Lys541Asn,Phe313Ser
MP0086	2016-07-07	2020-05-02	before	LH-0266B	region13	Cluster7	no	WT	Lys76Thr	CVIET	Ala220Ser,Gln271Glu,Asn326Ser,Ile356Thr,Arg371Ile	Lys541Asn,Phe313Ser
MP0165	2016-07-13	na	na	PK-0159	region10	Cluster7	no	WT	Lys76Thr	CVIET	Ala220Ser,Gln271Glu,Asn326Ser,Ile356Thr,Arg371Ile	Lys541Asn,Phe313Ser
MP0205	2016-07-19	2015-08-09	after	DL-0187A	region12	Cluster7	no	WT	Lys76Thr	CVIET	Ala220Ser,Gln271Glu,Asn326Ser,Ile356Thr,Arg371Ile	Lys541Asn,Phe313Ser
MP0423	2016-09-15	na	na	KH-0213A	region15	Cluster7	no	WT	na	na	Ala220Ser,Gln271Glu,Asn326Ser,Ile356Thr,Arg371Ile	Lys541Asn,Phe313Ser
MP0491	2016-11-05	2015-02-14	after	BD-0273	region32	Cluster7	no	WT	Lys76Thr	CVIET	Ala220Ser,Gln271Glu,Asn326Ser,Ile356Thr,Arg371Ile	Lys541Asn,Phe313Ser
MP0772	2017-01-15	na	na	PN-0196	region12	Cluster7	no	WT	Lys76Thr	CVIET	Ala220Ser,Gln271Glu,Asn326Ser,Ile356Thr,Arg371Ile	Lys541Asn,Phe313Ser
MP0692	2017-01-19	2015-08-09	after	DL-0187A	region12	Cluster7	no	WT	Lys76Thr	CVIET	Ala220Ser,Gln271Glu,Asn326Ser,Ile356Thr,Arg371Ile	Lys541Asn,Phe313Ser
MP0844	2017-01-19	2020-05-02	before	LH-0266B	region13	Cluster7	no	WT	Lys76Thr	CVIET	Ala220Ser,Gln271Glu,Asn326Ser,Ile356Thr,Arg371Ile	Lys541Asn,Phe313Ser
MP0785	2017-01-23	2020-05-02	before	LH-0266B	region13	Cluster7	no	WT	Lys76Thr	CVIET	Asn326Ser,Ile356Thr	Lys541Asn,Phe313Ser
MP0788	2017-01-25	na	na	DL-0187B	region12	Cluster7	no	WT	Lys76Thr	CVIET	Ala220Ser,Gln271Glu,Asn326Ser,Ile356Thr,Arg371Ile	Lys541Asn,Phe313Ser
MP1259	2017-06-13	na	na	KK-0254A	region13	Cluster7	no	WT	Lys76Thr	CVIET	Ala220Ser,Gln271Glu,Asn326Ser,Arg371Ile	Lys541Asn,Phe313Ser
MP1410	2017-06-13	na	na	HB-0269A	region25	Cluster7	no	WT	Lys76Thr	CVIET	Ala220Ser,Gln271Glu,Asn326Ser,Ile356Thr,Arg371Ile	Lys541Asn,Phe313Ser
MP1622	2017-07-11	na	na	LF-0284	region32	Cluster7	no	WT	Lys76Thr	CVIET	Ala220Ser,Gln271Glu,Asn326Ser,Ile356Thr,Arg371Ile	Lys541Asn,Phe313Ser
MP1775	2017-09-09	na	na	KN-0217A	region15	Cluster7	YES-2017	WT	Lys76Thr	CVIET	Ala220Ser,Gln271Glu,Asn326Ser,Ile356Thr,Arg371Ile	Lys541Asn,Phe313Ser
MP2738	2017-12-26	na	na	LK-0122	region7	Cluster7	no	WT	Lys76Thr	CVIET	Ala220Ser,Gln271Glu,Asn326Ser,Ile356Thr,Arg371Ile	Lys541Asn,Phe313Ser
MP3218	2018-04-02	na	na	TK-183A	region12	Cluster7	no	WT	Lys76Thr	CVIET	Ala220Ser,Gln271Glu,Asn326Ser,Ile356Thr,Arg371Ile	Lys541Asn,Phe313Ser
MP3234	2018-04-10	na	na	TK-183A	region12	Cluster7	no	WT	Lys76Thr	CVIET	Ala220Ser,Gln271Glu,Asn326Ser,Ile356Thr,Arg371Ile	Lys541Asn,Phe313Ser
MP3202	2018-04-12	na	na	TK-183A	region12	Cluster7	no	WT	Lys76Thr	CVIET	Ala220Ser,Gln271Glu,Asn326Ser,Ile356Thr,Arg371Ile	Lys541Asn,Phe313Ser
MP4701	2018-04-23	na	na	OL-0156	region10	Cluster7	no	WT	Lys76Thr	CVIET	Ala220Ser,Gln271Glu,Asn326Ser,Ile356Thr,Arg371Ile	Phe313Ser
MP3340	2018-05-04	na	na	DB-0145B	region10	Cluster7	no	WT	Lys76Thr	CVIET	Ala220Ser,Gln271Glu,Asn326Ser,Ile356Thr,Arg371Ile	Lys541Asn,Phe313Ser
MP3391	2018-05-07	na	na	DB-0145A	region10	Cluster7	no	WT	Lys76Thr	CVIET	Ala220Ser,Gln271Glu,Asn326Ser,Ile356Thr,Arg371Ile	Lys541Asn,Phe313Ser
MP3328	2018-05-09	na	na	LN-163B	region10	Cluster7	no	WT	Lys76Thr	CVIET	Ala220Ser,Gln271Glu,Asn326Ser,Ile356Thr,Arg371Ile	Lys541Asn,Phe313Ser
MP3614	2018-05-21	na	na	DB-0145B	region10	Cluster7	no	WT	Lys76Thr	CVIET	Ala220Ser,Gln271Glu,Asn326Ser,Ile356Thr,Arg371Ile	Lys541Asn,Phe313Ser
MP3559	2018-05-25	na	na	PK-0048	region2	Cluster7	no	WT	Lys76Thr	CVIET	Ala220Ser,Gln271Glu,Asn326Ser,Ile356Thr,Arg371Ile	Phe313Ser
MP3591	2018-05-28	na	na	DB-0145B	region10	Cluster7	YES-2018	WT	Lys76Thr	CVIET	Ala220Ser,Gln271Glu,Asn326Ser,Ile356Thr,Arg371Ile	Lys541Asn,Phe313Ser
MP3616	2018-06-04	na	na	LP-214A	region12	Cluster7	no	WT	Lys76Thr	CVIET	Ala220Ser,Asn326Ser,Ile356Thr	Lys541Asn,Phe313Ser
MP3618	2018-06-13	na	na	LP-214A	region12	Cluster7	no	WT	Lys76Thr	CVIET	Ala220Ser,Gln271Glu,Asn326Ser,Ile356Thr,Arg371Ile	Lys541Asn,Phe313Ser
MP3634	2018-06-16	na	na	TK-183A	region12	Cluster7	no	WT	Lys76Thr	CVIET	Ala220Ser,Gln271Glu,Asn326Ser,Ile356Thr,Arg371Ile	Lys541Asn,Phe313Ser
MP3943	2018-06-19	na	na	WM-201A	region12	Cluster7	no	WT	Lys76Thr	CVIET	Ala220Ser,Gln271Glu,Asn326Ser,Ile356Thr,Arg371Ile	Lys541Asn,Phe313Ser
MP4100	2018-06-28	na	na	DP-0227A	region15	Cluster7	no	WT	Lys76Thr	CVIET	Ala220Ser,Gln271Glu,Asn326Ser,Ile356Thr,Arg371Ile	Lys541Asn,Phe313Ser
MP4316	2018-11-13	na	na	TK-183A	region12	Cluster7	no	NA	Lys76Thr	CVIET	Ala220Ser,Arg371Ile	Phe313Ser
MP4320	2018-12-13	na	na	DL-0187B	region12	Cluster7	no	WT	Lys76Thr	CVIET	Ala220Ser,Gln271Glu,Asn326Ser,Ile356Thr,Arg371Ile	Lys541Asn,Phe313Ser
MP4381	2018-12-21	2015-08-09	after	DL-0187A	region12	Cluster7	no	WT	Lys76Thr	CVIET	Ala220Ser,Gln271Glu,Asn326Ser,Ile356Thr,Arg371Ile	Lys541Asn,Phe313Ser
MP4293	2018-12-23	2015-08-09	after	DL-0187A	region12	Cluster7	no	WT	Lys76Thr	CVIET	Ala220Ser,Gln271Glu,Asn326Ser,Ile356Thr,Arg371Ile	Lys541Asn,Phe313Ser
MP4300	2018-12-23	na	na	DL-0187B	region12	Cluster7	no	WT	Lys76Thr	CVIET	Ala220Ser,Gln271Glu,Asn326Ser,Ile356Thr,Arg371Ile	Lys541Asn,Phe313Ser
MP4214	2018-12-26	2015-08-09	after	DL-0187A	region12	Cluster7	no	WT	Lys76Thr	CVIET	Ala220Ser,Gln271Glu,Asn326Ser,Arg371Ile	Lys541Asn,Phe313Ser
MP4790	2019-12-16	na	na	TK-183A	region12	Cluster7	YES-2019	WT	Lys76Thr	CVIET	Ala220Ser,Gln271Glu,Asn326Ser,Ile356Thr,Arg371Ile	Lys541Asn,Phe313Ser
MS0043	2016-06-22	2017-07-04	before	TP-0339	region33	Cluster8	YES-2016	WT	Lys76Thr	CVIET	Gln271Glu,Asn326Ser,Arg371Ile	Ser258Leu
MP0767	2017-02-24	na	na	AR-0267A	region15	Cluster8	no	WT	Lys76Thr	CVIET	Ala220Ser,Gln271Glu,Asn326Ser,Ile356Thr,Arg371Ile	Ser258Leu
MP1823	2017-04-25	na	na	NC-0882	region44	Cluster8	no	NA	Lys76Thr	CVIET	Ala220Ser,Asn326Ser,Ile356Thr,Arg371Ile	Ser258Leu
MP1724	2017-07-11	na	na	HS-0364	region31	Cluster8	no	WT	Lys76Thr	CVIET	Ala220Ser,Gln271Glu,Asn326Ser,Ile356Thr,Arg371Ile	Ser258Leu
MP2016	2017-11-10	na	na	LK-0331	region33	Cluster8	no	WT	Lys76Thr	CVIET	Ala220Ser,Gln271Glu,Asn326Ser,Ile356Thr,Arg371Ile	Ser258Leu
MP2050	2017-11-15	2017-06-24	after	MM-0363A	region33	Cluster8	no	WT	Lys76Thr	CVIET	Ala220Ser,Asn326Ser,Ile356Thr,Arg371Ile	Ser258Leu
MP2051	2017-11-21	2017-06-24	after	MM-0363A	region33	Cluster8	no	WT	Lys76Thr	CVIET	Ala220Ser,Gln271Glu,Asn326Ser,Ile356Thr,Arg371Ile	Ser258Leu
MP2245	2017-11-28	na	na	LK-0331	region33	Cluster8	no	WT	Lys76Thr	CVIET	Ala220Ser,Gln271Glu,Asn326Ser,Ile356Thr,Arg371Ile	Ser258Leu
MP2160	2017-12-05	2017-06-24	after	MM-0363A	region33	Cluster8	YES-2017	WT	Lys76Thr	CVIET	Ala220Ser,Gln271Glu,Asn326Ser,Ile356Thr,Arg371Ile	Ser258Leu
MP2302	2017-12-06	2017-06-24	after	MM-0363A	region33	Cluster8	no	WT	Lys76Thr	CVIET	Ala220Ser,Gln271Glu,Asn326Ser,Ile356Thr,Arg371Ile	Ser258Leu
MP2200	2017-12-11	2017-07-04	after	TP-0339	region33	Cluster8	no	WT	Lys76Thr	CVIET	Ala220Ser,Gln271Glu,Asn326Ser,Ile356Thr,Arg371Ile	Ser258Leu
MP2321	2017-12-15	na	na	HT-0378B	region31	Cluster8	no	WT	Lys76Thr	CVIET	Ala220Ser,Gln271Glu,Asn326Ser,Ile356Thr,Arg371Ile	Ser258Leu
MP2667	2017-12-23	na	na	ET-11063	region29	Cluster8	no	WT	Lys76Thr	CVIET	Ala220Ser,Gln271Glu,Asn326Ser,Ile356Thr,Arg371Ile	Ser258Leu
MP2493	2017-12-25	2017-07-03	after	HG-0369	region35	Cluster8	no	WT	Lys76Thr	CVIET	Ala220Ser,Gln271Glu,Asn326Ser,Ile356Thr,Arg371Ile	Ser258Leu
MP2519	2017-12-26	na	na	LK-0331	region33	Cluster8	no	WT	Lys76Thr	CVIET	Ala220Ser,Gln271Glu,Ile356Thr,Arg371Ile	Ser258Leu
MP2537	2017-12-26	na	na	LK-0331	region33	Cluster8	no	WT	Lys76Thr	CVIET	Ala220Ser,Gln271Glu,Asn326Ser,Ile356Thr,Arg371Ile	Ser258Leu
MP2540	2017-12-26	2017-07-04	after	TP-0339	region33	Cluster8	no	WT	Lys76Thr	CVIET	Ala220Ser,Gln271Glu,Asn326Ser,Ile356Thr,Arg371Ile	Ser258Leu
MP2553	2017-12-28	2017-06-24	after	MM-0363A	region33	Cluster8	no	WT	Lys76Thr	CVIET	Ala220Ser,Gln271Glu,Asn326Ser,Ile356Thr,Arg371Ile	Ser258Leu
MP2552	2017-12-29	2017-06-24	after	MM-0363A	region33	Cluster8	no	WT	Lys76Thr	CVIET	Ala220Ser,Gln271Glu,Asn326Ser,Ile356Thr,Arg371Ile	Ser258Leu
MP2600	2018-01-08	2017-07-04	after	TP-0339	region33	Cluster8	no	WT	Lys76Thr	CVIET	Ala220Ser,Gln271Glu,Asn326Ser,Ile356Thr,Arg371Ile	Ser258Leu
MP2658	2018-01-15	2017-07-04	after	NT-0361	region33	Cluster8	no	WT	Lys76Thr	CVIET	Ala220Ser,Gln271Glu,Asn326Ser,Ile356Thr,Arg371Ile	Ser258Leu
MP2657	2018-01-16	2017-07-04	after	NT-0361	region33	Cluster8	no	WT	Lys76Thr	CVIET	Ala220Ser,Gln271Glu,Asn326Ser,Ile356Thr,Arg371Ile	Ser258Leu
MP2979	2018-01-24	2017-06-24	after	MM-0363A	region33	Cluster8	no	WT	Lys76Thr	CVIET	Ala220Ser,Gln271Glu,Asn326Ser,Ile356Thr,Arg371Ile	Ser258Leu
MP2876	2018-01-27	2017-07-03	after	HG-0369	region35	Cluster8	no	WT	Lys76Thr	CVIET	Ala220Ser,Gln271Glu,Asn326Ser,Ile356Thr,Arg371Ile	Ser258Leu
MP2940	2018-01-31	2017-07-04	after	NT-0361	region33	Cluster8	no	WT	Lys76Thr	CVIET	Ala220Ser,Gln271Glu,Asn326Ser,Ile356Thr,Arg371Ile	Ser258Leu
MP2903	2018-02-05	na	na	MK-11003	region25	Cluster8	no	WT	Lys76Thr	CVIET	Ala220Ser,Gln271Glu,Asn326Ser,Ile356Thr,Arg371Ile	Ser258Leu
MP2842	2018-02-06	na	na	MK-11003	region25	Cluster8	YES-2018	WT	Lys76Thr	CVIET	Ala220Ser,Gln271Glu,Asn326Ser,Ile356Thr,Arg371Ile	Ser258Leu
MP2900	2018-02-06	na	na	KL-0268E	region25	Cluster8	no	WT	Lys76Thr	CVIET	Ala220Ser,Gln271Glu,Asn326Ser,Ile356Thr,Arg371Ile	Ser258Leu
MP3016	2018-02-07	2017-07-04	after	NT-0361	region33	Cluster8	no	WT	Lys76Thr	CVIET	Ala220Ser,Gln271Glu,Asn326Ser,Ile356Thr,Arg371Ile	Ser258Leu
MP2935	2018-02-08	na	na	MK-11003	region25	Cluster8	no	WT	Lys76Thr	CVIET	Ala220Ser,Gln271Glu,Asn326Ser,Ile356Thr,Arg371Ile	Ser258Leu
MP2813	2018-02-12	na	na	MK-11003	region25	Cluster8	no	WT	Lys76Thr	CVIET	Ala220Ser,Gln271Glu,Asn326Ser,Ile356Thr,Arg371Ile	Ser258Leu
MP2952	2018-02-12	na	na	MK-11003	region25	Cluster8	no	WT	Lys76Thr	CVIET	Ala220Ser,Gln271Glu,Asn326Ser,Ile356Thr,Arg371Ile	Ser258Leu
MP2930	2018-02-14	na	na	MK-11003	region25	Cluster8	no	WT	Lys76Thr	CVIET	Ala220Ser,Gln271Glu,Asn326Ser,Ile356Thr,Arg371Ile	Ser258Leu
MP3083	2018-03-08	na	na	PL-11008A	region23	Cluster8	no	NA	Lys76Thr	CVIET	Ala220Ser,Gln271Glu,Asn326Ser,Ile356Thr,Arg371Ile	Ser258Leu
MP3096	2018-03-19	2017-06-24	after	MM-0363A	region33	Cluster8	no	WT	Lys76Thr	CVIET	Ala220Ser,Gln271Glu,Asn326Ser,Ile356Thr,Arg371Ile	Ser258Leu
MP3212	2018-03-26	2017-06-30	after	MK-363C	region30	Cluster8	no	WT	Lys76Thr	CVIET	Ala220Ser,Gln271Glu,Asn326Ser,Ile356Thr,Arg371Ile	Ser258Leu
MP3117	2018-04-04	2017-07-11	after	WM-0367	region35	Cluster8	no	WT	na	na	Gln271Glu,Asn326Ser,Ile356Thr,Arg371Ile	Ser258Leu
MP3180	2018-04-06	na	na	MM-11004	region30	Cluster8	no	WT	Lys76Thr	CVIET	Ala220Ser,Gln271Glu,Asn326Ser,Ile356Thr,Arg371Ile	Ser258Leu
MP3069	2018-04-09	2017-06-30	after	MK-363E	region30	Cluster8	no	WT	Lys76Thr	CVIET	Ala220Ser,Gln271Glu,Asn326Ser,Ile356Thr,Arg371Ile	Ser258Leu
MP3489	2018-05-21	na	na	HT-0378B	region31	Cluster8	no	WT	Lys76Thr	CVIET	Ala220Ser,Gln271Glu,Asn326Ser,Ile356Thr,Arg371Ile	Ser258Leu
MP3490	2018-05-23	na	na	HT-0378B	region31	Cluster8	no	WT	Lys76Thr	CVIET	Ala220Ser,Gln271Glu,Asn326Ser,Ile356Thr,Arg371Ile	Ser258Leu
MP3484	2018-06-01	2017-07-04	after	NT-0361	region33	Cluster8	no	NA	Lys76Thr	CVIET	Ala220Ser,Gln271Glu,Asn326Ser,Ile356Thr,Arg371Ile	Ser258Leu
MP3605	2018-06-02	2017-07-04	after	TP-0339	region33	Cluster8	no	WT	Lys76Thr	CVIET	Ala220Ser,Gln271Glu,Asn326Ser,Ile356Thr,Arg371Ile	Ser258Leu
MP4354	2018-12-27	na	na	LK-0331	region33	Cluster8	no	WT	Lys76Thr	CVIET	Ala220Ser,Gln271Glu,Asn326Ser,Ile356Thr,Arg371Ile	Ser258Leu
MP0411	2016-09-12	na	na	MP-0440	region37	Cluster9	YES-2016	WT	Lys76Thr	CVIET	Ala220Ser,Gln271Glu,Asn326Ser,Ile356Thr,Arg371Ile	Lys541Asn,Phe313Ser
MP0391	2016-09-13	na	na	MP-0440	region37	Cluster9	no	NA	Lys76Thr	CVIET	Ala220Ser,Gln271Glu,Asn326Ser,Ile356Thr,Arg371Ile	Lys541Asn,Phe313Ser
MP0412	2016-09-13	na	na	MP-0440	region37	Cluster9	no	WT	Lys76Thr	CVIET	Ala220Ser,Gln271Glu,Arg371Ile	Lys541Asn,Phe313Ser
MP2499	2017-01-02	2020-05-02	before	HH-0431	region37	Cluster9	no	WT	Lys76Thr	CVIET	Ala220Ser,Gln271Glu,Asn326Ser,Ile356Thr,Arg371Ile	Lys541Asn,Phe313Ser
MP1386	2017-06-11	na	na	MP-0440	region37	Cluster9	no	WT	Lys76Thr	CVIET	Ala220Ser,Gln271Glu,Asn326Ser,Ile356Thr,Arg371Ile	Lys541Asn,Phe313Ser
MP1594	2017-07-06	na	na	PT-0445	region38	Cluster9	no	WT	Lys76Thr	CVIET	Ala220Ser,Gln271Glu,Asn326Ser,Ile356Thr,Arg371Ile	Lys541Asn,Phe313Ser
MP1616	2017-07-10	na	na	BB-0316	region32	Cluster9	no	WT	Lys76Thr	CVIET	Ala220Ser,Gln271Glu,Asn326Ser,Ile356Thr,Arg371Ile	Lys541Asn,Phe313Ser
MP1894	2017-10-06	na	na	BB-0316	region32	Cluster9	no	WT	Lys76Thr	CVIET	Ala220Ser,Gln271Glu,Asn326Ser,Ile356Thr,Arg371Ile	Lys541Asn,Phe313Ser
MP1992	2017-10-26	na	na	ML-0458A	region38	Cluster9	no	WT	Lys76Thr	CVIET	Ala220Ser,Gln271Glu,Asn326Ser,Ile356Thr,Arg371Ile	Lys541Asn,Phe313Ser
MP2266	2017-11-27	na	na	KT-0433	region38	Cluster9	no	WT	Lys76Thr	CVIET	Ala220Ser,Gln271Glu,Asn326Ser,Ile356Thr,Arg371Ile	Lys541Asn,Phe313Ser
MP2229	2017-11-28	na	na	KT-0433	region38	Cluster9	YES-2017	WT	Lys76Thr	CVIET	Ala220Ser,Gln271Glu,Asn326Ser,Ile356Thr,Arg371Ile	Lys541Asn,Phe313Ser
MP2313	2017-12-02	na	na	MK-0428	region37	Cluster9	no	WT	Lys76Thr	CVIET	Ala220Ser,Gln271Glu,Asn326Ser,Ile356Thr,Arg371Ile	Lys541Asn,Phe313Ser
MP2483	2017-12-19	na	na	MP-0440	region37	Cluster9	no	WT	Lys76Thr	CVIET	Ala220Ser,Gln271Glu,Asn326Ser,Ile356Thr,Arg371Ile	Lys541Asn,Phe313Ser
MP2387	2017-12-21	na	na	BB-0316	region32	Cluster9	no	WT	Lys76Thr	CVIET	Ala220Ser,Gln271Glu,Asn326Ser,Ile356Thr,Arg371Ile	Lys541Asn,Phe313Ser
MP2473	2017-12-27	na	na	PT-0445	region38	Cluster9	no	WT	Lys76Thr	CVIET	Ala220Ser,Gln271Glu,Asn326Ser,Ile356Thr,Arg371Ile	Lys541Asn,Phe313Ser
MP2489	2017-12-28	na	na	ML-0458A	region38	Cluster9	no	WT	Lys76Thr	CVIET	Ala220Ser,Gln271Glu,Asn326Ser,Ile356Thr,Arg371Ile	Lys541Asn,Phe313Ser
MP2490	2018-01-01	na	na	LK-0462A	region37	Cluster9	no	NA	na	na	Ala220Ser,Arg371Ile	Lys541Asn,Phe313Ser
MP2458	2018-01-16	na	na	ML-0458B	region38	Cluster9	no	WT	Lys76Thr	CVIET	Ala220Ser,Gln271Glu,Asn326Ser,Ile356Thr,Arg371Ile	Lys541Asn,Phe313Ser
MP2485	2018-01-19	na	na	ML-0458A	region38	Cluster9	YES-2018	WT	Lys76Thr	CVIET	Ala220Ser,Gln271Glu,Asn326Ser,Ile356Thr,Arg371Ile	Lys541Asn,Phe313Ser
MP2758	2018-01-31	na	na	PT-0445	region38	Cluster9	no	WT	Lys76Thr	CVIET	Ala220Ser,Gln271Glu,Asn326Ser,Ile356Thr,Arg371Ile	Lys541Asn,Phe313Ser
MP3205	2018-02-04	na	na	MT-12140	region39	Cluster9	no	WT	Lys76Thr	CVIET	Ala220Ser,Gln271Glu,Asn326Ser,Ile356Thr,Arg371Ile	Lys541Asn,Phe313Ser
MP2769	2018-02-05	na	na	KT-0433	region38	Cluster9	no	WT	Lys76Thr	CVIET	Ala220Ser,Gln271Glu,Asn326Ser,Ile356Thr,Arg371Ile	Lys541Asn,Phe313Ser
MP3132	2018-03-19	na	na	KW-0473	region40	Cluster9	no	WT	Lys76Thr	CVIET	Ala220Ser,Gln271Glu,Ile356Thr,Arg371Ile	Lys541Asn,Phe313Ser
MP3136	2018-03-21	na	na	KW-0473	region40	Cluster9	no	WT	Lys76Thr	CVIET	Ala220Ser,Gln271Glu,Asn326Ser,Ile356Thr,Arg371Ile	Lys541Asn,Phe313Ser
MP3937	2018-05-29	na	na	TP-11301	region36	Cluster9	no	NA	na	na	Gln271Glu,Asn326Ser,Ile356Thr,Arg371Ile	Lys541Asn,Phe313Ser
MP3901	2018-06-04	na	na	TP-11301	region36	Cluster9	no	WT	Lys76Thr	CVIET	Ala220Ser,Gln271Glu,Asn326Ser,Ile356Thr,Arg371Ile	Lys541Asn,Phe313Ser
MP4001	2018-06-09	na	na	LK-0236	region27	Cluster9	no	WT	Lys76Thr	CVIET	Ala220Ser,Gln271Glu,Asn326Ser,Ile356Thr,Arg371Ile	Lys541Asn,Phe313Ser
MP4067	2018-06-10	2017-07-04	after	NT-0361	region33	Cluster9	no	WT	Lys76Thr	CVIET	Ala220Ser,Gln271Glu,Asn326Ser,Ile356Thr,Arg371Ile	Lys541Asn,Phe313Ser
MP3637	2018-06-15	na	na	TG-0294	region32	Cluster9	no	WT	Lys76Thr	CVIET	Ala220Ser,Gln271Glu,Asn326Ser,Ile356Thr,Arg371Ile	Lys541Asn,Phe313Ser
MP3645	2018-06-15	na	na	MK-11014	region32	Cluster9	no	WT	Lys76Thr	CVIET	Ala220Ser,Gln271Glu,Ile356Thr,Arg371Ile	Lys541Asn,Phe313Ser
MP4069	2018-06-16	na	na	LK-0236	region27	Cluster9	no	WT	Lys76Thr	CVIET	Ala220Ser,Gln271Glu,Asn326Ser,Ile356Thr,Arg371Ile	Lys541Asn,Phe313Ser
MP3989	2018-06-19	na	na	KT-0433	region38	Cluster9	no	WT	Lys76Thr	CVIET	Ala220Ser,Gln271Glu,Asn326Ser,Ile356Thr,Arg371Ile	Lys541Asn,Phe313Ser
MP4041	2018-06-20	na	na	KT-0433	region38	Cluster9	no	WT	Lys76Thr	CVIET	Ala220Ser,Gln271Glu,Asn326Ser,Ile356Thr,Arg371Ile	Lys541Asn,Phe313Ser
MP4070	2018-06-20	na	na	LK-0236	region27	Cluster9	no	WT	Lys76Thr	CVIET	Ala220Ser,Gln271Glu,Asn326Ser,Ile356Thr	Lys541Asn,Phe313Ser
MP3693	2018-06-26	na	na	BT-0435	region38	Cluster9	no	WT	Lys76Thr	CVIET	Ala220Ser,Gln271Glu,Asn326Ser,Ile356Thr,Arg371Ile	Lys541Asn,Phe313Ser
MP3958	2018-06-27	na	na	ML-0458A	region38	Cluster9	no	WT	Lys76Thr	CVIET	Ala220Ser,Gln271Glu,Asn326Ser,Ile356Thr,Arg371Ile	Lys541Asn,Phe313Ser
MP3800	2018-07-12	na	na	NB-11303	region36	Cluster9	no	WT	Lys76Thr	CVIET	Ala220Ser,Gln271Glu,Asn326Ser,Ile356Thr,Arg371Ile	Lys541Asn,Phe313Ser
MP3794	2018-08-06	na	na	MK-11003	region25	Cluster9	no	WT	Lys76Thr	CVIET	Ala220Ser,Gln271Glu,Asn326Ser,Ile356Thr,Arg371Ile	Lys541Asn,Phe313Ser
MP4422	2018-12-18	na	na	BB-0316	region32	Cluster9	no	WT	Lys76Thr	CVIET	Ala220Ser,Gln271Glu,Asn326Ser,Ile356Thr,Arg371Ile	Lys541Asn,Phe313Ser
MP2496	2018-12-22	na	na	ML-0458A	region38	Cluster9	no	WT	Lys76Thr	CVIET	Ala220Ser,Gln271Glu,Asn326Ser,Ile356Thr,Arg371Ile	Lys541Asn,Phe313Ser
MP4773	2019-10-07	na	na	TP-11301	region36	Cluster9	YES-2019	WT	Lys76Thr	CVIET	Ala220Ser,Gln271Glu,Asn326Ser,Ile356Thr,Arg371Ile	Lys541Asn,Phe313Ser
MP4939	2020-06-23	na	na	KT-0433	region38	Cluster9	no	WT	Lys76Thr	CVIET	Ile356Thr,Arg371Ile	Lys541Asn,Phe313Ser
MP5004	2020-07-20	na	na	KT-0433	region38	Cluster9	YES-2020	WT	Lys76Thr	CVIET	Ala220Ser,Gln271Glu,Asn326Ser,Ile356Thr,Arg371Ile	Lys541Asn,Phe313Ser
MP0425	2016-09-30	na	na	NL-0368	region31	Cluster10	YES-2016	WT	Lys76Thr	CVIET	Ala220Ser,Gln271Glu,Asn326Ser,Ile356Thr,Arg371Ile	Lys541Asn,Phe313Ser
MP0483	2016-11-15	na	na	KP-0344B	region28	Cluster10	no	WT	Lys76Thr	CVIET	Ala220Ser,Gln271Glu,Asn326Ser,Ile356Thr,Arg371Ile	Lys541Asn,Phe313Ser
MP1712	2017-07-24	na	na	PH-0356B	region31	Cluster10	no	WT	Lys76Thr	CVIET	Ala220Ser,Gln271Glu,Asn326Ser,Ile356Thr,Arg371Ile	Lys541Asn,Phe313Ser
MP1649	2017-07-29	na	na	HB-11007	region25	Cluster10	no	WT	Lys76Thr	CVIET	Ala220Ser,Gln271Glu,Ile356Thr,Arg371Ile	Lys541Asn,Phe313Ser
MP1115	2017-08-11	na	na	PH-0356B	region31	Cluster10	no	WT	Lys76Thr	CVIET	Ala220Ser,Gln271Glu,Asn326Ser,Ile356Thr,Arg371Ile	Lys541Asn,Phe313Ser
MP1847	2017-10-05	na	na	PH-0356A	region31	Cluster10	no	WT	Lys76Thr	CVIET	Ala220Ser,Gln271Glu,Asn326Ser,Ile356Thr,Arg371Ile	Lys541Asn,Phe313Ser
MP2104	2017-10-27	na	na	NL-0368	region31	Cluster10	no	WT	Lys76Thr	CVIET	Ala220Ser,Gln271Glu,Asn326Ser,Ile356Thr,Arg371Ile	Lys541Asn,Phe313Ser
MP2123	2017-11-06	na	na	PS-11064A	region30	Cluster10	no	WT	Lys76Thr	CVIET	Ala220Ser,Gln271Glu,Asn326Ser,Ile356Thr,Arg371Ile	Lys541Asn,Phe313Ser
MP2126	2017-11-13	na	na	PS-11064A	region30	Cluster10	no	WT	Lys76Thr	CVIET	Ala220Ser,Gln271Glu,Asn326Ser,Ile356Thr,Arg371Ile	Lys541Asn,Phe313Ser
MP2125	2017-11-17	na	na	PS-11064A	region30	Cluster10	no	WT	Lys76Thr	CVIET	Ala220Ser,Gln271Glu,Asn326Ser,Ile356Thr,Arg371Ile	Lys541Asn,Phe313Ser
MP2130	2017-11-17	na	na	HS-0364	region31	Cluster10	no	WT	Lys76Thr	CVIET	Ala220Ser,Gln271Glu,Asn326Ser,Ile356Thr,Arg371Ile	Lys541Asn,Phe313Ser
MP2127	2017-11-19	na	na	PS-11064A	region30	Cluster10	no	WT	Lys76Thr	CVIET	Ala220Ser,Gln271Glu,Asn326Ser,Ile356Thr,Arg371Ile	Lys541Asn,Phe313Ser
MP2109	2017-11-20	na	na	HB-0340A	region28	Cluster10	no	WT	Lys76Thr	CVIET	Ala220Ser,Gln271Glu,Asn326Ser,Ile356Thr,Arg371Ile	Lys541Asn,Phe313Ser
MP2115	2017-11-20	na	na	PS-11064A	region30	Cluster10	no	WT	Lys76Thr	CVIET	Ala220Ser,Gln271Glu,Asn326Ser,Ile356Thr,Arg371Ile	Lys541Asn,Phe313Ser
MP2118	2017-11-22	na	na	PS-11064A	region30	Cluster10	YES-2017	WT	Lys76Thr	CVIET	Ala220Ser,Gln271Glu,Asn326Ser,Ile356Thr,Arg371Ile	Lys541Asn,Phe313Ser
MP2372	2017-11-29	na	na	PS-11064A	region30	Cluster10	no	WT	Lys76Thr	CVIET	Ala220Ser,Gln271Glu,Asn326Ser,Ile356Thr,Arg371Ile	Lys541Asn,Phe313Ser
MP2234	2017-12-02	na	na	MM-11004	region30	Cluster10	no	WT	Lys76Thr	CVIET	Ala220Ser,Gln271Glu,Asn326Ser,Ile356Thr,Arg371Ile	Lys541Asn,Phe313Ser
MP2367	2017-12-03	na	na	PS-11064A	region30	Cluster10	no	WT	Lys76Thr	CVIET	Ala220Ser,Gln271Glu,Asn326Ser,Ile356Thr,Arg371Ile	Lys541Asn,Phe313Ser
MP2197	2017-12-07	na	na	MM-11004	region30	Cluster10	no	WT	Lys76Thr	CVIET	Ala220Ser,Gln271Glu,Asn326Ser,Ile356Thr,Arg371Ile	Lys541Asn,Phe313Ser
MP2374	2017-12-08	na	na	PS-11064A	region30	Cluster10	no	WT	Lys76Thr	CVIET	Ala220Ser,Gln271Glu,Asn326Ser,Ile356Thr,Arg371Ile	Lys541Asn,Phe313Ser
MP2253	2017-12-14	2017-06-24	after	MM-0363A	region33	Cluster10	no	WT	Lys76Thr	CVIET	Ala220Ser,Gln271Glu,Asn326Ser,Ile356Thr,Arg371Ile	Lys541Asn,Phe313Ser
MP2376	2017-12-16	na	na	PS-11064A	region30	Cluster10	no	WT	Lys76Thr	CVIET	Ala220Ser,Gln271Glu,Asn326Ser,Ile356Thr,Arg371Ile	Lys541Asn,Phe313Ser
MP2638	2017-12-18	na	na	PS-11064A	region30	Cluster10	no	WT	Lys76Thr	CVIET	Ala220Ser,Gln271Glu,Asn326Ser,Ile356Thr,Arg371Ile	Lys541Asn,Phe313Ser
MP2641	2017-12-25	na	na	PS-11064A	region30	Cluster10	no	WT	Lys76Thr	CVIET	Ala220Ser,Gln271Glu,Asn326Ser,Ile356Thr,Arg371Ile	Lys541Asn,Phe313Ser
MP2695	2017-12-25	2017-07-04	after	TM-0363F	region30	Cluster10	no	WT	Lys76Thr	CVIET	Ala220Ser,Gln271Glu,Asn326Ser,Ile356Thr,Arg371Ile	Lys541Asn,Phe313Ser
MP2582	2017-12-26	na	na	PS-11064A	region30	Cluster10	no	WT	Lys76Thr	CVIET	Ala220Ser,Gln271Glu,Asn326Ser,Ile356Thr,Arg371Ile	Lys541Asn,Phe313Ser
MP2583	2017-12-27	na	na	PS-11064A	region30	Cluster10	no	WT	Lys76Thr	CVIET	Ala220Ser,Gln271Glu,Asn326Ser,Ile356Thr,Arg371Ile	Lys541Asn,Phe313Ser
MP2643	2018-01-15	na	na	KP-0344B	region28	Cluster10	no	WT	Lys76Thr	CVIET	Ala220Ser,Gln271Glu,Asn326Ser,Ile356Thr,Arg371Ile	Lys541Asn,Phe313Ser
MP2650	2018-01-17	na	na	PH-0356B	region31	Cluster10	no	WT	Lys76Thr	CVIET	Ala220Ser,Gln271Glu,Asn326Ser,Ile356Thr,Arg371Ile	Lys541Asn,Phe313Ser
MP2913	2018-01-24	na	na	PS-11064A	region30	Cluster10	no	WT	Lys76Thr	CVIET	Ala220Ser,Gln271Glu,Asn326Ser,Ile356Thr,Arg371Ile	Lys541Asn,Phe313Ser
MP2882	2018-01-25	2016-08-31	after	PL-0366	region26	Cluster10	no	WT	Lys76Thr	CVIET	Ala220Ser,Gln271Glu,Asn326Ser,Ile356Thr,Arg371Ile	Lys541Asn,Phe313Ser
MP2929	2018-01-27	2017-07-12	after	HD-0363D	region30	Cluster10	no	WT	Lys76Thr	CVIET	Ala220Ser,Gln271Glu,Asn326Ser,Ile356Thr,Arg371Ile	Lys541Asn,Phe313Ser
MP2985	2018-02-01	na	na	PS-11064A	region30	Cluster10	no	WT	Lys76Thr	CVIET	Ala220Ser,Gln271Glu,Asn326Ser,Ile356Thr,Arg371Ile	Lys541Asn,Phe313Ser
MP2893	2018-02-12	2017-07-04	after	TP-0339	region33	Cluster10	no	WT	Lys76Thr	CVIET	Ala220Ser,Gln271Glu,Asn326Ser,Ile356Thr	Lys541Asn,Phe313Ser
MP2891	2018-02-13	na	na	PS-11064A	region30	Cluster10	YES-2018	WT	Lys76Thr	CVIET	Ala220Ser,Gln271Glu,Asn326Ser,Ile356Thr,Arg371Ile	Lys541Asn,Phe313Ser
MP3752	2018-08-23	na	na	LK-0331	region33	Cluster10	no	WT	Lys76Thr	CVIET	Ala220Ser,Gln271Glu,Asn326Ser,Ile356Thr,Arg371Ile	Lys541Asn,Phe313Ser
MP4142	2018-09-27	na	na	HB-11007	region25	Cluster10	no	WT	Lys76Thr	CVIET	Ala220Ser,Gln271Glu,Asn326Ser,Ile356Thr,Arg371Ile	Lys541Asn,Phe313Ser
MP4304	2019-01-06	na	na	PS-11064A	region30	Cluster10	no	WT	Lys76Thr	CVIET	Ala220Ser,Gln271Glu,Asn326Ser,Ile356Thr,Arg371Ile	Lys541Asn,Phe313Ser
MP4804	2019-12-11	na	na	WK-0343	region33	Cluster10	YES-2019	WT	Lys76Thr	CVIET	Ala220Ser,Gln271Glu,Asn326Ser,Ile356Thr,Arg371Ile	Lys541Asn,Phe313Ser
MP1123	2017-08-07	na	na	LK-0331	region33	Cluster11	no	WT	Lys76Thr	CVIET	Ala220Ser,Gln271Glu,Asn326Ser,Ile356Thr,Arg371Ile	Lys541Asn,Phe313Ser
MP2018	2017-11-10	na	na	LK-0331	region33	Cluster11	YES-2017	WT	Lys76Thr	CVIET	Ala220Ser,Gln271Glu,Asn326Ser,Ile356Thr,Arg371Ile	Lys541Asn,Phe313Ser
MP2210	2017-12-11	na	na	LK-0331	region33	Cluster11	no	WT	Lys76Thr	CVIET	Ala220Ser,Gln271Glu,Asn326Ser,Ile356Thr,Arg371Ile	Lys541Asn,Phe313Ser
MP2285	2017-12-12	2017-07-04	after	TP-0339	region33	Cluster11	no	WT	Lys76Thr	CVIET	Ala220Ser,Gln271Glu,Asn326Ser,Ile356Thr,Arg371Ile	Lys541Asn,Phe313Ser
MP2172	2017-12-14	na	na	MM-0181	region32	Cluster11	no	WT	Lys76Thr	CVIET	Ala220Ser,Gln271Glu,Asn326Ser,Ile356Thr,Arg371Ile	Lys541Asn,Phe313Ser
MP2527	2017-12-18	2017-07-04	after	TP-0339	region33	Cluster11	no	WT	Lys76Thr	CVIET	Ala220Ser,Gln271Glu,Asn326Ser,Ile356Thr,Arg371Ile	Lys541Asn,Phe313Ser
MP2565	2017-12-19	2017-07-04	after	TP-0339	region33	Cluster11	no	WT	Lys76Thr	CVIET	Gln271Glu,Ile356Thr,Arg371Ile	Lys541Asn,Phe313Ser
MP2511	2017-12-21	na	na	LK-0331	region33	Cluster11	no	WT	Lys76Thr	CVIET	Ala220Ser,Gln271Glu,Asn326Ser,Ile356Thr,Arg371Ile	Lys541Asn,Phe313Ser
MP2518	2017-12-25	2017-06-30	after	MK-363E	region30	Cluster11	no	WT	Lys76Thr	CVIET	Ala220Ser,Gln271Glu,Asn326Ser,Ile356Thr,Arg371Ile	Lys541Asn,Phe313Ser
MP2626	2018-01-08	2017-06-30	after	MK-363E	region30	Cluster11	no	WT	Lys76Thr	CVIET	Ala220Ser,Gln271Glu,Asn326Ser,Ile356Thr,Arg371Ile	Lys541Asn,Phe313Ser
MP3024	2018-02-02	na	na	ML-0363B	region30	Cluster11	no	WT	Lys76Thr	CVIET	Ala220Ser,Gln271Glu,Asn326Ser,Ile356Thr,Arg371Ile	Lys541Asn,Phe313Ser
MP2868	2018-02-14	2017-07-04	after	TP-0339	region33	Cluster11	no	WT	Lys76Thr	CVIET	Ala220Ser,Gln271Glu,Asn326Ser,Ile356Thr,Arg371Ile	Lys541Asn,Phe313Ser
MP2814	2018-02-19	2017-06-30	after	MK-363E	region30	Cluster11	no	WT	Lys76Thr	CVIET	Ala220Ser,Gln271Glu,Asn326Ser,Ile356Thr,Arg371Ile	Lys541Asn,Phe313Ser
MP2771	2018-02-21	2017-07-04	after	TP-0339	region33	Cluster11	no	WT	Lys76Thr	CVIET	Ala220Ser,Gln271Glu,Asn326Ser,Ile356Thr,Arg371Ile	Lys541Asn,Phe313Ser
MP3203	2018-02-27	na	na	HB-0211	region18	Cluster11	no	WT	Lys76Thr	CVIET	Ala220Ser,Gln271Glu,Asn326Ser,Ile356Thr,Arg371Ile	Lys541Asn,Phe313Ser
MP3216	2018-03-01	na	na	HB-0211	region18	Cluster11	no	WT	Lys76Thr	CVIET	Ala220Ser,Gln271Glu,Asn326Ser,Ile356Thr,Arg371Ile	Phe313Ser
MP3064	2018-03-05	na	na	HB-0211	region18	Cluster11	no	WT	Lys76Thr	CVIET	Ala220Ser,Gln271Glu,Asn326Ser,Ile356Thr,Arg371Ile	Lys541Asn,Phe313Ser
MP3201	2018-03-26	na	na	ML-0363B	region30	Cluster11	no	WT	Lys76Thr	CVIET	Ala220Ser,Asn326Ser,Ile356Thr,Arg371Ile	Lys541Asn,Phe313Ser
MP3131	2018-04-04	na	na	ML-0363B	region30	Cluster11	no	WT	Lys76Thr	CVIET	Ala220Ser,Gln271Glu,Asn326Ser,Ile356Thr,Arg371Ile	Lys541Asn,Phe313Ser
MP3209	2018-04-09	na	na	ML-0363B	region30	Cluster11	no	WT	Lys76Thr	CVIET	Ala220Ser,Arg371Ile	Lys541Asn,Phe313Ser
MP3252	2018-05-18	2017-07-04	after	TP-0339	region33	Cluster11	no	WT	Lys76Thr	CVIET	Ala220Ser,Gln271Glu,Asn326Ser,Ile356Thr,Arg371Ile	Lys541Asn,Phe313Ser
MP3587	2018-05-25	na	na	CL-0335	region36	Cluster11	YES-2018	WT	Lys76Thr	CVIET	Ala220Ser,Gln271Glu,Asn326Ser,Ile356Thr,Arg371Ile	Lys541Asn,Phe313Ser
MP3667	2018-06-16	2016-04-13	after	TK-0376	region34	Cluster11	no	WT	Lys76Thr	CVIET	Ala220Ser,Asn326Ser,Ile356Thr,Arg371Ile	Lys541Asn,Phe313Ser
MP4042	2018-06-20	2017-07-04	after	TP-0339	region33	Cluster11	no	WT	Lys76Thr	CVIET	Ala220Ser,Gln271Glu,Asn326Ser,Ile356Thr,Arg371Ile	Lys541Asn,Phe313Ser
MP4060	2018-06-22	na	na	HS-0364	region31	Cluster11	no	WT	Lys76Thr	CVIET	Ala220Ser,Gln271Glu,Asn326Ser,Ile356Thr,Arg371Ile	Lys541Asn,Phe313Ser
MP4025	2018-06-26	2017-07-04	after	TP-0339	region33	Cluster11	no	WT	Lys76Thr	CVIET	Ala220Ser,Gln271Glu,Asn326Ser,Ile356Thr,Arg371Ile	Lys541Asn,Phe313Ser
MP3787	2018-07-16	na	na	PG-0424A	region34	Cluster11	no	WT	Lys76Thr	CVIET	Ala220Ser,Gln271Glu,Asn326Ser,Ile356Thr,Arg371Ile	Lys541Asn,Phe313Ser
MP3759	2018-09-15	na	na	BW-0382	region34	Cluster11	no	WT	na	na	Ala220Ser,Gln271Glu,Asn326Ser,Ile356Thr,Arg371Ile	Phe313Ser
MP4151	2018-10-09	2017-07-11	after	WM-0367	region35	Cluster11	no	WT	na	na	Ala220Ser,Gln271Glu,Asn326Ser,Ile356Thr,Arg371Ile	Lys541Asn,Phe313Ser
MP4140	2018-10-11	na	na	KL-11013	region35	Cluster11	no	WT	Lys76Thr	CVIET	Ala220Ser,Gln271Glu,Asn326Ser,Ile356Thr,Arg371Ile	Lys541Asn,Phe313Ser
MP4412	2018-12-03	2017-07-04	after	TP-0339	region33	Cluster11	no	WT	Lys76Thr	CVIET	Ala220Ser,Gln271Glu,Asn326Ser,Ile356Thr,Arg371Ile	Lys541Asn,Phe313Ser
METF.HRP.49	2018-12-19	na	na	TP-0339	region33	Cluster11	no	WT	Lys76Thr	CVIET	Ala220Ser,Gln271Glu,Asn326Ser,Ile356Thr,Arg371Ile	Phe313Ser
MP4690	2019-07-09	na	na	HB-0320A	region21	Cluster11	no	WT	Lys76Thr	CVIET	Ala220Ser,Gln271Glu,Asn326Ser,Ile356Thr,Arg371Ile	Lys541Asn,Phe313Ser
MP4774	2019-12-30	na	na	LK-0331	region33	Cluster11	YES-2019	WT	Lys76Thr	CVIET	Ala220Ser,Gln271Glu,Asn326Ser,Ile356Thr,Arg371Ile	Lys541Asn,Phe313Ser
MP4777	2020-01-08	na	na	LK-0331	region33	Cluster11	YES-2020	WT	Lys76Thr	CVIET	Ala220Ser,Gln271Glu,Asn326Ser,Ile356Thr,Arg371Ile	Lys541Asn,Phe313Ser
MP0594	2016-01-02	na	na	KP-0344B	region28	Cluster12	YES-2016	P441L	Lys76Thr	CVIET	Ala220Ser,Gln271Glu,Asn326Ser,Ile356Thr,Arg371Ile	Lys541Asn,Phe313Ser
MP0569	2016-12-21	na	na	HS-0364	region31	Cluster12	no	P441L	Lys76Thr	CVIET	Arg371Ile	Lys541Asn,Phe313Ser
MP1171	2017-05-15	2017-06-30	before	MK-363C	region30	Cluster12	no	P441L	Lys76Thr	CVIET	Ala220Ser,Gln271Glu,Asn326Ser,Ile356Thr,Arg371Ile	Lys541Asn,Phe313Ser
MP1356	2017-05-30	2017-07-12	before	HD-0363D	region30	Cluster12	no	P441L	Lys76Thr	CVIET	Ala220Ser,Gln271Glu,Asn326Ser,Ile356Thr,Arg371Ile	Lys541Asn,Phe313Ser
MP1391	2017-06-06	2017-07-12	before	HD-0363D	region30	Cluster12	no	P441L	Lys76Thr	CVIET	Ala220Ser,Gln271Glu,Asn326Ser,Ile356Thr,Arg371Ile	Lys541Asn,Phe313Ser
MP1298	2017-06-20	na	na	KL-0394	region35	Cluster12	no	P441L	Lys76Thr	CVIET	Ala220Ser,Gln271Glu,Asn326Ser,Arg371Ile	Lys541Asn,Phe313Ser
MP1311	2017-06-21	na	na	MH-0298A	region23	Cluster12	no	P441L	Lys76Thr	CVIET	Ala220Ser,Gln271Glu,Asn326Ser,Ile356Thr,Arg371Ile	Lys541Asn,Phe313Ser
MP1434	2017-06-21	na	na	KL-0394	region35	Cluster12	no	P441L	Lys76Thr	CVIET	Ala220Ser,Gln271Glu,Asn326Ser,Ile356Thr,Arg371Ile	Lys541Asn,Phe313Ser
MP1352	2017-06-25	2016-04-13	after	TK-0376	region34	Cluster12	no	P441L	Lys76Thr	CVIET	Ala220Ser,Gln271Glu,Asn326Ser,Ile356Thr,Arg371Ile	Lys541Asn,Phe313Ser
MP1662	2017-06-26	na	na	KL-0394	region35	Cluster12	no	P441L	Lys76Thr	CVIET	Ala220Ser,Gln271Glu,Asn326Ser,Ile356Thr,Arg371Ile	na
MP1708	2017-06-29	na	na	PH-0356B	region31	Cluster12	no	P441L	Lys76Thr	CVIET	Ala220Ser,Gln271Glu,Asn326Ser,Ile356Thr,Arg371Ile	Lys541Asn,Phe313Ser
MP1740	2017-07-03	na	na	NK-0425A	region35	Cluster12	no	P441L	Lys76Thr	CVIET	Ala220Ser,Gln271Glu,Asn326Ser,Ile356Thr,Arg371Ile	Lys541Asn,Phe313Ser
MP2136	2017-08-16	na	na	BK-0405A	region34	Cluster12	no	P441L	Lys76Thr	CVIET	Ala220Ser,Gln271Glu,Asn326Ser,Ile356Thr,Arg371Ile	Lys541Asn,Phe313Ser
MP2137	2017-08-20	na	na	HT-0378A	region31	Cluster12	no	P441L	Lys76Thr	CVIET	Ala220Ser,Gln271Glu,Asn326Ser,Ile356Thr,Arg371Ile	Lys541Asn,Phe313Ser
MP2122	2017-11-09	na	na	KP-0344A	region28	Cluster12	no	P441L	Lys76Thr	CVIET	Ala220Ser,Gln271Glu,Asn326Ser,Ile356Thr,Arg371Ile	Lys541Asn,Phe313Ser
MP2116	2017-11-20	na	na	KP-0344A	region28	Cluster12	YES-2017	P441L	Lys76Thr	CVIET	Ala220Ser,Gln271Glu,Asn326Ser,Ile356Thr,Arg371Ile	Lys541Asn,Phe313Ser
MP2128	2017-11-20	na	na	KP-0344A	region28	Cluster12	no	P441L	Lys76Thr	CVIET	Ala220Ser,Gln271Glu,Asn326Ser,Ile356Thr,Arg371Ile	Lys541Asn
MP2099	2017-11-21	na	na	HS-0364	region31	Cluster12	no	P441L	Lys76Thr	CVIET	Ala220Ser,Gln271Glu,Asn326Ser,Ile356Thr,Arg371Ile	Lys541Asn,Phe313Ser
MP2299	2017-12-13	na	na	KP-0344B	region28	Cluster12	no	P441L	Lys76Thr	CVIET	Ala220Ser,Gln271Glu,Asn326Ser,Ile356Thr,Arg371Ile	Lys541Asn,Phe313Ser
MP2636	2017-12-20	na	na	PH-0356B	region31	Cluster12	no	P441L	Lys76Thr	CVIET	Ala220Ser,Gln271Glu,Asn326Ser,Ile356Thr,Arg371Ile	Lys541Asn,Phe313Ser
MP2672	2018-01-06	na	na	HB-0340A	region28	Cluster12	YES-2018	P441L	Lys76Thr	CVIET	Ala220Ser,Gln271Glu,Asn326Ser,Ile356Thr,Arg371Ile	Lys541Asn,Phe313Ser
MP2656	2018-01-16	na	na	TK-0306	region23	Cluster12	no	WT	Lys76Thr	CVIET	Ala220Ser,Gln271Glu,Asn326Ser,Ile356Thr,Arg371Ile	Lys541Asn,Phe313Ser
MP2835	2018-01-29	na	na	PN-11048	region21	Cluster12	no	P441L	Lys76Thr	CVIET	Ala220Ser,Gln271Glu,Asn326Ser,Ile356Thr,Arg371Ile	Lys541Asn,Phe313Ser
MP2945	2018-02-10	na	na	KP-0344A	region28	Cluster12	no	P441L	Lys76Thr	CVIET	Ala220Ser,Gln271Glu,Asn326Ser,Ile356Thr,Arg371Ile	Lys541Asn,Phe313Ser
MP3887	2018-07-03	na	na	KP-0344B	region28	Cluster12	no	P441L	Lys76Thr	CVIET	Arg371Ile	Lys541Asn,Phe313Ser
MP4415	2018-11-26	na	na	KP-0344A	region28	Cluster12	no	P441L	Lys76Thr	CVIET	Ala220Ser,Gln271Glu,Asn326Ser,Ile356Thr,Arg371Ile	Lys541Asn,Phe313Ser
MP4346	2018-12-03	na	na	KP-0344A	region28	Cluster12	no	P441L	Lys76Thr	CVIET	Ala220Ser,Gln271Glu,Asn326Ser,Ile356Thr,Arg371Ile	Lys541Asn,Phe313Ser
MP4418	2018-12-03	na	na	NL-0368	region31	Cluster12	no	P441L	Lys76Thr	CVIET	Ala220Ser,Gln271Glu,Asn326Ser,Ile356Thr,Arg371Ile	Lys541Asn,Phe313Ser
MP4340	2018-12-05	na	na	HB-0340A	region28	Cluster12	no	P441L	Lys76Thr	CVIET	Ala220Ser,Gln271Glu,Asn326Ser,Ile356Thr,Arg371Ile	Phe313Ser
MP4303	2018-12-18	na	na	HT-0378B	region31	Cluster12	no	P441L	Lys76Thr	CVIET	Ala220Ser,Gln271Glu,Asn326Ser,Ile356Thr,Arg371Ile	Lys541Asn,Phe313Ser
MP4224	2018-12-24	2017-06-30	after	MK-363C	region30	Cluster12	no	NA	Lys76Thr	CVIET	Gln271Glu	Lys541Asn,Phe313Ser
MP4265	2018-12-24	na	na	KP-0344B	region28	Cluster12	no	P441L	Lys76Thr	CVIET	Ala220Ser,Gln271Glu,Ile356Thr,Arg371Ile	Lys541Asn,Phe313Ser
MP4292	2019-01-10	na	na	KP-0344A	region28	Cluster12	YES-2019	P441L	Lys76Thr	CVIET	Ala220Ser,Gln271Glu,Asn326Ser,Ile356Thr,Arg371Ile	Lys541Asn,Phe313Ser
MP4466	2019-01-28	na	na	KP-0344A	region28	Cluster12	no	P441L	na	na	Gln271Glu,Asn326Ser	Lys541Asn,Phe313Ser
MP4927	2020-06-08	2015-09-12	after	HT-0323	region30	Cluster12	YES-2020	P441L	Lys76Thr	CVIET	Ala220Ser,Gln271Glu,Asn326Ser,Ile356Thr,Arg371Ile	Lys541Asn,Phe313Ser
MP0211	2016-06-20	na	na	BT-0353A	region28	Cluster13	YES-2016	F446I	Lys76Thr	CVIET	Ala220Ser,Gln271Glu,Asn326Ser,Ile356Thr,Arg371Ile	Gly308Glu,Ser258Leu
MP0751	2017-02-07	na	na	BT-0353B	region28	Cluster13	no	F446I	Lys76Thr	CVIET	Ala220Ser,Gln271Glu,Asn326Ser,Ile356Thr,Arg371Ile	Gly308Glu,Ser258Leu
MP0976	2017-03-16	na	na	BT-0353B	region28	Cluster13	no	F446I	Lys76Thr	CVIET	Ala220Ser	Gly308Glu,Ser258Leu
MP1549	2017-06-06	na	na	HP-11009	region28	Cluster13	no	F446I	Lys76Thr	CVIET	Ala220Ser,Gln271Glu,Asn326Ser,Ile356Thr,Arg371Ile	Gly308Glu,Ser258Leu
MP1551	2017-06-06	na	na	KP-0344A	region28	Cluster13	no	F446I	Lys76Thr	CVIET	Ala220Ser,Gln271Glu,Asn326Ser,Ile356Thr,Arg371Ile	Gly308Glu,Ser258Leu
MP1332	2017-06-14	na	na	KL-0394	region35	Cluster13	no	F446I	Lys76Thr	CVIET	Ala220Ser,Gln271Glu,Asn326Ser,Ile356Thr,Arg371Ile	Gly308Glu,Ser258Leu
MP1509	2017-06-14	2017-06-24	before	MM-0363A	region33	Cluster13	no	F446I	Lys76Thr	CVIET	Ala220Ser,Gln271Glu,Asn326Ser,Ile356Thr,Arg371Ile	Gly308Glu,Ser258Leu
MP1369	2017-06-17	2016-04-13	after	TK-0376	region34	Cluster13	no	F446I	Lys76Thr	CVIET	Ala220Ser,Gln271Glu,Asn326Ser,Ile356Thr,Arg371Ile	Gly308Glu,Ser258Leu
MP1952	2017-06-19	na	na	KP-11065	region8	Cluster13	no	F446I	Lys76Thr	CVIET	Ala220Ser,Gln271Glu,Asn326Ser,Ile356Thr,Arg371Ile	Gly308Glu,Ser258Leu
MP1584	2017-06-21	2017-06-24	before	MM-0363A	region33	Cluster13	no	F446I	Lys76Thr	CVIET	Ala220Ser,Gln271Glu,Asn326Ser,Ile356Thr,Arg371Ile	Gly308Glu,Ser258Leu
MP1669	2017-07-03	na	na	PH-0356B	region31	Cluster13	no	F446I	Lys76Thr	CVIET	Ala220Ser,Gln271Glu,Asn326Ser,Ile356Thr,Arg371Ile	Gly308Glu,Ser258Leu
MP1671	2017-07-25	na	na	PT-0395	region35	Cluster13	no	F446I	Lys76Thr	CVIET	Ala220Ser,Gln271Glu,Asn326Ser,Ile356Thr,Arg371Ile	Gly308Glu,Ser258Leu
MP1095	2017-08-07	na	na	BT-0353B	region28	Cluster13	YES-2017	F446I	Lys76Thr	CVIET	Ala220Ser,Gln271Glu,Asn326Ser,Ile356Thr,Arg371Ile	Gly308Glu,Ser258Leu
MP1136	2017-08-07	na	na	PH-0356A	region31	Cluster13	no	F446I	Lys76Thr	CVIET	Ala220Ser,Gln271Glu,Asn326Ser,Ile356Thr,Arg371Ile	Gly308Glu,Ser258Leu
MP1087	2017-08-16	na	na	PH-0356B	region31	Cluster13	no	F446I	Lys76Thr	CVIET	Ala220Ser,Gln271Glu,Asn326Ser,Ile356Thr,Arg371Ile	Gly308Glu,Ser258Leu
MP1799	2017-09-19	2017-07-11	after	WM-0367	region35	Cluster13	no	F446I	na	na	Arg371Ile	Gly308Glu,Ser258Leu
MP2052	2017-11-11	na	na	HS-0364	region31	Cluster13	no	F446I	Lys76Thr	CVIET	Ala220Ser,Gln271Glu,Asn326Ser,Ile356Thr,Arg371Ile	Gly308Glu,Ser258Leu
MP3015	2018-02-10	na	na	KL-0394	region35	Cluster13	YES-2018	F446I	Lys76Thr	CVIET	Ala220Ser,Gln271Glu,Asn326Ser,Ile356Thr,Arg371Ile	Gly308Glu,Ser258Leu
MP4443	2019-02-18	na	na	BT-0353B	region28	Cluster13	no	F446I	Lys76Thr	CVIET		Gly308Glu,Ser258Leu
MP4447	2019-02-18	na	na	BT-0353B	region28	Cluster13	no	F446I	Lys76Thr	CVIET	Ala220Ser,Gln271Glu,Asn326Ser,Ile356Thr,Arg371Ile	Gly308Glu,Ser258Leu
MP4719	2019-02-26	na	na	BT-0353A	region28	Cluster13	no	F446I	Lys76Thr	CVIET	Ala220Ser,Gln271Glu,Asn326Ser,Ile356Thr,Arg371Ile	Gly308Glu,Ser258Leu
MP4456	2019-02-28	na	na	BT-0353B	region28	Cluster13	no	F446I	Lys76Thr	CVIET	Ala220Ser,Gln271Glu,Asn326Ser,Ile356Thr,Arg371Ile	Gly308Glu,Ser258Leu
MP4512	2019-04-15	na	na	BT-0353B	region28	Cluster13	no	F446I	Lys76Thr	CVIET	Ala220Ser,Gln271Glu,Asn326Ser,Ile356Thr,Arg371Ile	Gly308Glu,Ser258Leu
MP4516	2019-04-16	na	na	BT-0353A	region28	Cluster13	no	F446I	Lys76Thr	CVIET	Ala220Ser,Gln271Glu,Asn326Ser,Ile356Thr,Arg371Ile	Gly308Glu,Ser258Leu
MP4515	2019-04-20	na	na	BT-0353A	region28	Cluster13	no	F446I	Lys76Thr	CVIET	Ala220Ser,Gln271Glu,Asn326Ser,Ile356Thr,Arg371Ile	Gly308Glu,Ser258Leu
MP4517	2019-04-21	na	na	BT-0353A	region28	Cluster13	no	F446I	Lys76Thr	CVIET	Ala220Ser,Gln271Glu,Asn326Ser,Ile356Thr,Arg371Ile	Gly308Glu,Ser258Leu
MP4492	2019-04-26	na	na	BT-0353B	region28	Cluster13	no	F446I.wt.mix	Lys76Thr	CVIET	Ala220Ser,Gln271Glu,Asn326Ser,Ile356Thr,Arg371Ile	Ser258Leu
MP4525	2019-05-04	na	na	BT-0353B	region28	Cluster13	no	F446I	Lys76Thr	CVIET	Ala220Ser,Gln271Glu,Asn326Ser,Ile356Thr,Arg371Ile	Gly308Glu,Ser258Leu
MP4532	2019-05-06	na	na	BT-0353A	region28	Cluster13	no	F446I	Lys76Thr	CVIET	Ala220Ser,Gln271Glu,Asn326Ser,Ile356Thr,Arg371Ile	Gly308Glu,Ser258Leu
MP4608	2019-06-12	na	na	BT-0353B	region28	Cluster13	no	F446I	Lys76Thr	CVIET	Ala220Ser,Gln271Glu,Asn326Ser,Ile356Thr,Arg371Ile	Gly308Glu,Ser258Leu
MP4617	2019-06-17	na	na	BT-0353B	region28	Cluster13	no	F446I	Lys76Thr	CVIET	Ala220Ser,Gln271Glu,Asn326Ser,Ile356Thr,Arg371Ile	Gly308Glu,Ser258Leu
MP4598	2019-06-18	na	na	BT-0353B	region28	Cluster13	YES-2019	F446I	Lys76Thr	CVIET	Ala220Ser,Gln271Glu,Asn326Ser,Ile356Thr,Arg371Ile	Gly308Glu,Ser258Leu
MP4687	2019-06-28	na	na	BT-0353B	region28	Cluster13	no	F446I	Lys76Thr	CVIET	Ala220Ser,Gln271Glu,Asn326Ser,Ile356Thr,Arg371Ile	Gly308Glu,Ser258Leu
MP4683	2019-07-05	na	na	BT-0353B	region28	Cluster13	no	F446I	Lys76Thr	CVIET	Ala220Ser,Gln271Glu,Asn326Ser,Ile356Thr,Arg371Ile	Ser258Leu
METF.HRP.52	2016-06-22	na	na	TP-0339	region33	Cluster14	no	M562I	Lys76Thr	CVIET	Ala220Ser,Gln271Glu,Asn326Ser,Ile356Thr,Arg371Ile	Ser258Leu
METF.HRP.58	2016-06-22	na	na	TP-0339	region33	Cluster14	no	M562I	Lys76Thr	CVIET	Ala220Ser,Gln271Glu,Asn326Ser,Ile356Thr,Arg371Ile	Ser258Leu
MS0039	2016-06-22	2017-07-04	before	TP-0339	region33	Cluster14	no	M562I	Lys76Thr	CVIET	Ala220Ser,Gln271Glu,Ile356Thr,Arg371Ile	Ser258Leu
MS0040	2016-06-22	2017-07-04	before	TP-0339	region33	Cluster14	no	M562I	Lys76Thr	CVIET	Ala220Ser,Gln271Glu,Asn326Ser,Ile356Thr,Arg371Ile	Ser258Leu
MS0042	2016-06-22	2017-07-04	before	TP-0339	region33	Cluster14	no	M562I	Lys76Thr	CVIET	Ala220Ser,Gln271Glu,Asn326Ser,Ile356Thr,Arg371Ile	Ser258Leu
MS0044	2016-06-22	2017-07-04	before	TP-0339	region33	Cluster14	no	M562I	Lys76Thr	CVIET	Ala220Ser,Gln271Glu,Asn326Ser,Ile356Thr,Arg371Ile	Ser258Leu
MS0046	2016-06-22	2017-07-04	before	TP-0339	region33	Cluster14	no	M562I	Lys76Thr	CVIET	Ala220Ser,Gln271Glu,A/G,Ile356Thr,Arg371Ile	Ser258Leu
MS0050	2016-06-22	2017-07-04	before	TP-0339	region33	Cluster14	no	M562I	Lys76Thr	CVIET	Ala220Ser,Gln271Glu,Asn326Ser,Ile356Thr,Arg371Ile	Ser258Leu
MS0059	2016-06-22	2017-07-04	before	TP-0339	region33	Cluster14	no	M562I	Lys76Thr	CVIET	Ala220Ser,Gln271Glu,Asn326Ser,Ile356Thr,Arg371Ile	Ser258Leu
MS0063	2016-06-22	2017-07-04	before	TP-0339	region33	Cluster14	no	M562I	Lys76Thr	CVIET	Ala220Ser,Asn326Ser,Ile356Thr	Ser258Leu
MS0065	2016-06-22	2017-07-04	before	TP-0339	region33	Cluster14	no	M562I	Lys76Thr	CVIET	Ala220Ser,Gln271Glu,Asn326Ser,Ile356Thr,Arg371Ile	Ser258Leu
MS0067	2016-06-22	2017-07-04	before	TP-0339	region33	Cluster14	no	M562I	Lys76Thr	CVIET	Ala220Ser,Gln271Glu,Ile356Thr,Arg371Ile	Ser258Leu
MS0068	2016-06-22	2017-07-04	before	TP-0339	region33	Cluster14	no	M562I	Lys76Thr	CVIET	Ala220Ser,Gln271Glu,Asn326Ser,Ile356Thr,Arg371Ile	Ser258Leu
MP0377	2016-09-10	na	na	HS-0364	region31	Cluster14	no	M562I	Lys76Thr	CVIET	Ala220Ser,Gln271Glu,Asn326Ser,Ile356Thr,Arg371Ile	Ser258Leu
MP0400	2016-09-29	na	na	HS-0364	region31	Cluster14	YES-2016	M562I	Lys76Thr	CVIET	Ala220Ser,Gln271Glu,Asn326Ser,Ile356Thr,Arg371Ile	Ser258Leu
MP1567	2017-05-10	2017-07-04	before	TP-0339	region33	Cluster14	no	M562I	Lys76Thr	CVIET	Ala220Ser,Gln271Glu,Asn326Ser,Ile356Thr,Arg371Ile	Ser258Leu
MP1572	2017-05-21	2017-07-04	before	TP-0339	region33	Cluster14	no	M562I	Lys76Thr	CVIET	Ala220Ser,Gln271Glu,Asn326Ser,Ile356Thr,Arg371Ile	Ser258Leu
MP1558	2017-05-22	2017-07-04	before	TP-0339	region33	Cluster14	no	M562I	Lys76Thr	CVIET	Ala220Ser,Gln271Glu,Ile356Thr,Arg371Ile	Ser258Leu
MP1559	2017-05-25	2017-07-04	before	TP-0339	region33	Cluster14	no	M562I	Lys76Thr	CVIET	Ala220Ser,Gln271Glu,Asn326Ser,Ile356Thr,Arg371Ile	Ser258Leu
MP1444	2017-06-02	2017-07-04	before	TP-0339	region33	Cluster14	no	M562I.G449A	na	na		Ser258Leu
MP1604	2017-07-10	2017-07-04	after	TP-0339	region33	Cluster14	no	M562I	Lys76Thr	CVIET	Ala220Ser,Gln271Glu,Asn326Ser,Ile356Thr,Arg371Ile	Ser258Leu
MP1630	2017-07-13	2017-06-24	after	MM-0363A	region33	Cluster14	YES-2017	M562I	Lys76Thr	CVIET	Ala220Ser,Gln271Glu,Asn326Ser,Ile356Thr,Arg371Ile	Ser258Leu
MP3644	2018-06-15	na	na	MK-11014	region32	Cluster14	no	M562I	na	na	Ala220Ser,Gln271Glu,Ile356Thr	Ser258Leu
MP3948	2018-06-18	na	na	MK-11014	region32	Cluster14	no	M562I	na	na	Ala220Ser	Ser258Leu
MP3950	2018-06-18	na	na	MK-11014	region32	Cluster14	YES-2018	M562I	Lys76Thr	CVIET	Ala220Ser,Gln271Glu,Asn326Ser,Ile356Thr,Arg371Ile	Ser258Leu
MP4016	2018-06-18	2015-02-05	after	BW-0228	region27	Cluster14	no	M562I	Lys76Thr	CVIET	Ala220Ser,Asn326Ser,Ile356Thr,Arg371Ile	Ser258Leu
MP4380	2019-01-16	na	na	MM-0181	region32	Cluster14	no	M562I	Lys76Thr	CVIET	Ala220Ser,Gln271Glu,Asn326Ser,Ile356Thr,Arg371Ile	Ser258Leu
MP4298	2019-01-25	na	na	MM-0181	region32	Cluster14	no	M562I	Lys76Thr	CVIET	Ala220Ser,Gln271Glu,Asn326Ser,Ile356Thr,Arg371Ile	Ser258Leu
MP4805	2019-12-02	2015-09-12	after	HT-0323	region30	Cluster14	no	M562I	Lys76Thr	CVIET	Ala220Ser,Gln271Glu,Asn326Ser,Ile356Thr,Arg371Ile	Ser258Leu
MP4801	2019-12-03	na	na	MH-0298A	region23	Cluster14	YES-2019	M562I	Lys76Thr	CVIET	Ala220Ser,Gln271Glu,Asn326Ser,Ile356Thr,Arg371Ile	Ser258Leu
MP4803	2019-12-04	na	na	MH-0298A	region23	Cluster14	no	M562I	Lys76Thr	CVIET	Ala220Ser,Gln271Glu,Asn326Ser,Ile356Thr,Arg371Ile	Ser258Leu
MP4811	2019-12-05	na	na	KL-0268E	region25	Cluster14	no	M562I	Lys76Thr	CVIET	Ala220Ser,Gln271Glu,Asn326Ser,Ile356Thr,Arg371Ile	Ser258Leu
MP4808	2019-12-06	2015-09-12	after	HT-0323	region30	Cluster14	no	M562I	Lys76Thr	CVIET	Ala220Ser,Gln271Glu,Asn326Ser,Ile356Thr,Arg371Ile	Ser258Leu
MP1120	2017-08-17	na	na	BB-0316	region32	Cluster15	no	WT	Lys76Thr	CVIET	Ala220Ser,Asn326Ser,Ile356Thr,Arg371Ile	Phe313Ser
MP2120	2017-11-23	na	na	PS-11064A	region30	Cluster15	YES-2017	WT	Lys76Thr	CVIET	Ala220Ser,Gln271Glu,Asn326Ser,Ile356Thr,Arg371Ile	Lys541Asn,Phe313Ser
MP2267	2017-12-11	na	na	LK-0331	region33	Cluster15	no	WT	Lys76Thr	CVIET	Ala220Ser,Gln271Glu,Asn326Ser,Ile356Thr,Arg371Ile	Lys541Asn,Phe313Ser
MP2566	2017-12-18	na	na	LK-0331	region33	Cluster15	no	WT	Lys76Thr	CVIET	Ala220Ser,Gln271Glu,Asn326Ser,Ile356Thr,Arg371Ile	Lys541Asn,Phe313Ser
MP2541	2017-12-25	na	na	LK-0331	region33	Cluster15	no	WT	Lys76Thr	CVIET	Ala220Ser,Gln271Glu,Asn326Ser,Ile356Thr,Arg371Ile	Lys541Asn,Phe313Ser
MP2544	2017-12-25	na	na	LK-0331	region33	Cluster15	no	WT	Lys76Thr	CVIET	Ala220Ser,Gln271Glu,Asn326Ser,Ile356Thr,Arg371Ile	Lys541Asn,Phe313Ser
MP2561	2017-12-28	2017-07-04	after	TP-0339	region33	Cluster15	no	WT	Lys76Thr	CVIET	Ala220Ser,Gln271Glu,Asn326Ser,Ile356Thr,Arg371Ile	Lys541Asn,Phe313Ser
MP3169	2018-03-20	2017-07-04	after	TP-0339	region33	Cluster15	no	WT	Lys76Thr	CVIET	Ala220Ser,Gln271Glu,Asn326Ser,Ile356Thr,Arg371Ile	Lys541Asn,Phe313Ser
MP3125	2018-04-15	na	na	OL-0156	region10	Cluster15	no	WT	Lys76Thr	CVIET	Ala220Ser,Gln271Glu,Asn326Ser,Ile356Thr,Arg371Ile	Lys541Asn,Phe313Ser
MP3204	2018-04-15	na	na	OL-0156	region10	Cluster15	no	WT	Lys76Thr	CVIET	Ala220Ser,Gln271Glu,Asn326Ser,Ile356Thr,Arg371Ile	Lys541Asn,Phe313Ser
MP3411	2018-04-16	na	na	TG-0294	region32	Cluster15	no	WT	Lys76Thr	CVIET	Ala220Ser,Gln271Glu,Asn326Ser,Ile356Thr,Arg371Ile	Lys541Asn,Phe313Ser
MP3419	2018-04-18	na	na	TG-0294	region32	Cluster15	no	WT	Lys76Thr	CVIET	Ala220Ser,Gln271Glu,Asn326Ser,Ile356Thr,Arg371Ile	Lys541Asn,Phe313Ser
MP4006	2018-05-28	na	na	LK-0236	region27	Cluster15	no	WT	Lys76Thr	CVIET	Ala220Ser,Gln271Glu,Asn326Ser,Ile356Thr,Arg371Ile	Lys541Asn,Phe313Ser
MP3503	2018-05-31	na	na	MN-268C	region25	Cluster15	no	WT	Lys76Thr	CVIET	Ala220Ser,Gln271Glu,Asn326Ser,Ile356Thr,Arg371Ile	Lys541Asn,Phe313Ser
MP3746	2018-06-09	na	na	PL-0661	na	Cluster15	no	WT	Lys76Thr	CVIET	Ala220Ser,Gln271Glu,Asn326Ser,Ile356Thr,Arg371Ile	Lys541Asn,Phe313Ser
MP3501	2018-06-11	na	na	MK-11003	region25	Cluster15	no	WT	Lys76Thr	CVIET	Ala220Ser,Gln271Glu,Asn326Ser,Ile356Thr,Arg371Ile	Lys541Asn,Phe313Ser
MP3542	2018-06-12	na	na	OT-0268D	region25	Cluster15	no	WT	Lys76Thr	CVIET	Ala220Ser,Gln271Glu,Asn326Ser,Ile356Thr,Arg371Ile	Lys541Asn,Phe313Ser
MP3866	2018-06-19	2016-03-14	after	PL-0327A	region30	Cluster15	no	WT	Lys76Thr	CVIET	Ala220Ser,Gln271Glu,Asn326Ser,Ile356Thr,Arg371Ile	Lys541Asn,Phe313Ser
MP4073	2018-06-20	na	na	LK-0331	region33	Cluster15	no	WT	Lys76Thr	CVIET	Ala220Ser,Gln271Glu,Asn326Ser,Ile356Thr,Arg371Ile	Lys541Asn,Phe313Ser
MP3880	2018-06-23	na	na	MN-268C	region25	Cluster15	no	WT	Lys76Thr	CVIET	Ala220Ser,Gln271Glu,Asn326Ser,Ile356Thr,Arg371Ile	Lys541Asn,Phe313Ser
MP4051	2018-06-25	na	na	MN-268C	region25	Cluster15	YES-2018	WT	Lys76Thr	CVIET	Ala220Ser,Gln271Glu,Asn326Ser,Ile356Thr,Arg371Ile	Lys541Asn,Phe313Ser
MP4093	2018-06-25	2016-03-14	after	PL-0327A	region30	Cluster15	no	WT	Lys76Thr	CVIET	Ala220Ser,Gln271Glu,Asn326Ser,Ile356Thr,Arg371Ile	Lys541Asn,Phe313Ser
MP4097	2018-06-25	na	na	MN-268C	region25	Cluster15	no	WT	Lys76Thr	CVIET	Ala220Ser,Gln271Glu,Asn326Ser,Ile356Thr,Arg371Ile	Lys541Asn,Phe313Ser
MP4096	2018-06-26	na	na	MN-268C	region25	Cluster15	no	WT	Lys76Thr	CVIET	Ala220Ser,Gln271Glu,Asn326Ser,Ile356Thr,Arg371Ile	Lys541Asn,Phe313Ser
MP4050	2018-06-27	na	na	MN-268C	region25	Cluster15	no	WT	Lys76Thr	CVIET	Ala220Ser,Gln271Glu,Asn326Ser,Ile356Thr,Arg371Ile	Lys541Asn,Phe313Ser
MP4058	2018-06-27	2017-07-04	after	TP-0339	region33	Cluster15	no	NA	Lys76Thr	CVIET	Ala220Ser,Gln271Glu,Asn326Ser,Ile356Thr,Arg371Ile	Lys541Asn,Phe313Ser
MP4257	2018-12-17	2017-06-24	after	MM-0363A	region33	Cluster15	no	WT	Lys76Thr	CVIET	Ala220Ser,Gln271Glu,Arg371Ile	Lys541Asn,Phe313Ser
MP4328	2018-12-17	na	na	LK-0331	region33	Cluster15	no	WT	Lys76Thr	CVIET	Gln271Glu,Asn326Ser,Ile356Thr,Arg371Ile	Lys541Asn,Phe313Ser
MP4746	2019-03-14	na	na	WK-0343	region33	Cluster15	YES-2019	WT	Lys76Thr	CVIET	Ala220Ser,Gln271Glu,Asn326Ser,Arg371Ile	Lys541Asn,Phe313Ser
MP0214	2016-04-07	na	na	PP-11050A	region14	Cluster16	no	WT	Lys76Thr	CVIET	Ala220Ser,Gln271Glu,Asn326Ser,Ile356Thr,Arg371Ile	Lys541Asn,Phe313Ser
MP0240	2016-06-13	2020-05-02	before	LH-0266A	region13	Cluster16	no	WT	Lys76Thr	CVIET	Ala220Ser,Gln271Glu,Asn326Ser,Ile356Thr,Arg371Ile	Lys541Asn,Phe313Ser
MP0243	2016-06-14	2020-05-02	before	LH-0266A	region13	Cluster16	YES-2016	WT	Lys76Thr	CVIET	Ala220Ser,Gln271Glu,Asn326Ser,Ile356Thr,Arg371Ile	Lys541Asn,Phe313Ser
MP0244	2016-06-14	2020-05-02	before	LH-0266A	region13	Cluster16	no	WT	Lys76Thr	CVIET	Ala220Ser,Gln271Glu,Asn326Ser,Ile356Thr,Arg371Ile	Lys541Asn,Phe313Ser
MP0245	2016-06-14	2020-05-02	before	LH-0266A	region13	Cluster16	no	WT	Lys76Thr	CVIET	Ala220Ser,Gln271Glu,Asn326Ser,Ile356Thr,Arg371Ile	Lys541Asn,Phe313Ser
MP0248	2016-06-15	2020-05-02	before	LH-0266A	region13	Cluster16	no	WT	Lys76Thr	CVIET	Ala220Ser,Gln271Glu,Asn326Ser,Ile356Thr,Arg371Ile	Lys541Asn,Phe313Ser
MP0249	2016-06-15	2020-05-02	before	LH-0266A	region13	Cluster16	no	WT	Lys76Thr	CVIET	Ala220Ser,Gln271Glu,Asn326Ser,Ile356Thr,Arg371Ile	Lys541Asn,Phe313Ser
MP0251	2016-06-17	2020-05-02	before	LH-0266A	region13	Cluster16	no	WT	Lys76Thr	CVIET	Ala220Ser,Gln271Glu,Asn326Ser,Ile356Thr,Arg371Ile	Lys541Asn,Phe313Ser
MP0252	2016-06-17	2020-05-02	before	LH-0266A	region13	Cluster16	no	WT	Lys76Thr	CVIET	Ala220Ser,Gln271Glu,Asn326Ser,Ile356Thr,Arg371Ile	Lys541Asn,Phe313Ser
MP0253	2016-06-18	2020-05-02	before	LH-0266A	region13	Cluster16	no	WT	Lys76Thr	CVIET	Ala220Ser,Gln271Glu,Asn326Ser,Ile356Thr,Arg371Ile	Lys541Asn,Phe313Ser
MP0254	2016-06-19	2020-05-02	before	LH-0266A	region13	Cluster16	no	WT	Lys76Thr	CVIET	Ala220Ser,Gln271Glu,Asn326Ser,Ile356Thr,Arg371Ile	Lys541Asn,Phe313Ser
MP0136	2016-06-20	2020-05-02	before	LH-0266B	region13	Cluster16	no	WT	Lys76Thr	CVIET	Ala220Ser,Gln271Glu,Asn326Ser,Ile356Thr,Arg371Ile	Lys541Asn,Phe313Ser
MP0087	2016-06-23	2020-05-02	before	LH-0266B	region13	Cluster16	no	WT	Lys76Thr	CVIET	Ala220Ser,Gln271Glu,Asn326Ser,Ile356Thr,Arg371Ile	Lys541Asn,Phe313Ser
MP0144	2016-06-23	na	na	KK-0254A	region13	Cluster16	no	WT	Lys76Thr	CVIET	Ala220Ser,Gln271Glu,Asn326Ser,Ile356Thr,Arg371Ile	Lys541Asn,Phe313Ser
MP0089	2016-06-27	2020-05-02	before	LH-0266B	region13	Cluster16	no	WT	Lys76Thr	CVIET	Ala220Ser,Gln271Glu,Asn326Ser,Ile356Thr,Arg371Ile	Lys541Asn,Phe313Ser
MP0440	2016-09-12	na	na	KK-0254A	region13	Cluster16	no	WT	Lys76Thr	CVIET	Ala220Ser,Gln271Glu,Asn326Ser,Ile356Thr,Arg371Ile	Lys541Asn,Phe313Ser
MP0442	2016-09-20	na	na	KK-0254A	region13	Cluster16	no	WT	Lys76Thr	CVIET	Ala220Ser,Gln271Glu,Asn326Ser,Arg371Ile	Lys541Asn,Phe313Ser
MP0439	2016-09-21	na	na	KK-0254A	region13	Cluster16	no	WT	Lys76Thr	CVIET	Ala220Ser,Gln271Glu,Asn326Ser,Ile356Thr,Arg371Ile	Lys541Asn,Phe313Ser
METF.HRP.4	2016-12-10	na	na	HB-0320A	region21	Cluster16	no	WT	Lys76Thr	CVIET	Ala220Ser,Gln271Glu,Asn326Ser,Ile356Thr,Arg371Ile	Lys541Asn,Phe313Ser
MP0608	2016-12-19	na	na	KL-11013	region35	Cluster16	no	WT	Lys76Thr	CVIET	Ala220Ser,Gln271Glu,Asn326Ser,Ile356Thr,Arg371Ile	Lys541Asn,Phe313Ser
MP0529	2016-12-29	2020-05-02	before	LH-0266B	region13	Cluster16	no	WT	Lys76Thr	CVIET	Ala220Ser,Gln271Glu,Asn326Ser,Ile356Thr,Arg371Ile	Lys541Asn,Phe313Ser
MP0843	2017-01-10	na	na	WM-0416B	region24	Cluster16	no	WT	Lys76Thr	CVIET	Ala220Ser,Gln271Glu,Asn326Ser,Ile356Thr,Arg371Ile	Lys541Asn,Phe313Ser
MP0858	2017-01-31	na	na	WT-11053A	region14	Cluster16	no	WT	Lys76Thr	CVIET	Ala220Ser,Gln271Glu,Asn326Ser,Ile356Thr,Arg371Ile	Lys541Asn,Phe313Ser
MP0957	2017-02-28	na	na	KK-0254A	region13	Cluster16	no	WT	Lys76Thr	CVIET	Ala220Ser,Gln271Glu,Asn326Ser,Ile356Thr,Arg371Ile	Lys541Asn,Phe313Ser
METF.HRP.2	2017-03-20	na	na	PH-0336A	region19	Cluster16	YES-2017	WT	Lys76Thr	CVIET	Ala220Ser,Gln271Glu,Asn326Ser,Ile356Thr,Arg371Ile	Lys541Asn,Phe313Ser
MS0150	2017-03-20	2016-03-13	after	PH-0336A	region19	Cluster16	no	WT	Lys76Thr	CVIET	Ala220Ser,Gln271Glu,Asn326Ser,Ile356Thr,Arg371Ile	Lys541Asn,Phe313Ser
MP0196	2016-07-19	na	na	MT-0432	region16	Cluster17	YES-2016	WT	Lys76Thr	CVIET	Ala220Ser,Gln271Glu,Asn326Ser,Ile356Thr,Arg371Ile	Lys541Asn,Phe313Ser
MP0376	2016-09-10	na	na	HS-0364	region31	Cluster17	no	WT	Lys76Thr	CVIET	Ala220Ser,Gln271Glu,Asn326Ser,Ile356Thr,Arg371Ile	Lys541Asn,Phe313Ser
MP0404	2016-09-14	na	na	NP-0400A	region34	Cluster17	no	WT	Lys76Thr	CVIET	Gln271Glu,Asn326Ser,Ile356Thr,Arg371Ile	Lys541Asn,Phe313Ser
MP0466	2016-10-24	na	na	KL-11013	region35	Cluster17	no	WT	Lys76Thr	CVIET	Ala220Ser,Gln271Glu,Asn326Ser,Ile356Thr,Arg371Ile	Lys541Asn,Phe313Ser
MP1186	2017-05-22	na	na	PK-0406A	region24	Cluster17	no	WT	Lys76Thr	CVIET	Ala220Ser,Gln271Glu,Asn326Ser,Ile356Thr,Arg371Ile	Lys541Asn,Phe313Ser
MP1944	2017-06-06	na	na	MC-0392A	region24	Cluster17	no	WT	Lys76Thr	CVIET	Ala220Ser,Gln271Glu,Asn326Ser,Ile356Thr,Arg371Ile	Lys541Asn,Phe313Ser
MP1416	2017-06-15	na	na	HS-0364	region31	Cluster17	no	WT	Lys76Thr	CVIET	Ala220Ser,Gln271Glu,Asn326Ser,Ile356Thr,Arg371Ile	Lys541Asn,Phe313Ser
MP1624	2017-06-30	na	na	HS-0364	region31	Cluster17	no	WT	Lys76Thr	CVIET	Ala220Ser,Gln271Glu,Asn326Ser,Ile356Thr,Arg371Ile	Lys541Asn,Phe313Ser
MP1062	2017-07-04	na	na	NA	na	Cluster17	no	WT	Lys76Thr	CVIET	Ala220Ser,Gln271Glu,Asn326Ser,Ile356Thr,Arg371Ile	Lys541Asn,Phe313Ser
MP1726	2017-07-17	na	na	HS-0364	region31	Cluster17	no	WT	Lys76Thr	CVIET	Ala220Ser,Gln271Glu,Asn326Ser,Ile356Thr,Arg371Ile	Lys541Asn,Phe313Ser
MP1844	2017-09-23	na	na	HT-0378A	region31	Cluster17	no	WT	Lys76Thr	CVIET	Ala220Ser,Gln271Glu,Asn326Ser,Ile356Thr,Arg371Ile	Lys541Asn,Phe313Ser
MP1848	2017-10-07	na	na	HS-0364	region31	Cluster17	no	WT	Lys76Thr	CVIET	Ala220Ser,Gln271Glu,Asn326Ser,Ile356Thr,Arg371Ile	Lys541Asn,Phe313Ser
MP2269	2017-11-27	na	na	MC-0393B	region24	Cluster17	no	NA	Lys76Thr	CVIET	Ala220Ser,Gln271Glu,Asn326Ser,Ile356Thr,Arg371Ile	Lys541Asn,Phe313Ser
MP2312	2017-11-28	na	na	HB-0340A	region28	Cluster17	no	WT	Lys76Thr	CVIET	Ala220Ser,Gln271Glu,Asn326Ser,Ile356Thr,Arg371Ile	Lys541Asn,Phe313Ser
MP2335	2017-12-04	na	na	HB-0340A	region28	Cluster17	no	WT	Lys76Thr	CVIET	Ala220Ser,Gln271Glu,Asn326Ser,Ile356Thr,Arg371Ile	Lys541Asn,Phe313Ser
MP2195	2017-12-15	2017-06-24	after	MM-0363A	region33	Cluster17	YES-2017	WT	Lys76Thr	CVIET	Ala220Ser,Gln271Glu,Asn326Ser,Ile356Thr,Arg371Ile	Lys541Asn,Phe313Ser
MP2665	2017-12-18	na	na	HS-0364	region31	Cluster17	no	WT	Lys76Thr	CVIET	Ala220Ser,Gln271Glu,Asn326Ser,Ile356Thr,Arg371Ile	Lys541Asn,Phe313Ser
MP3225	2018-04-14	2017-07-11	after	WM-0367	region35	Cluster17	no	WT	Lys76Thr	CVIET	Ala220Ser,Asn326Ser,Ile356Thr	Lys541Asn,Phe313Ser
MP3364	2018-05-15	2017-06-24	after	MM-0363A	region33	Cluster17	no	WT	Lys76Thr	CVIET	Ala220Ser,Gln271Glu,Asn326Ser,Ile356Thr,Arg371Ile	Lys541Asn,Phe313Ser
MP3491	2018-05-21	2017-07-04	after	NT-0361	region33	Cluster17	no	NA	Lys76Thr	CVIET	Ala220Ser,Gln271Glu,Asn326Ser,Ile356Thr,Arg371Ile	Lys541Asn,Phe313Ser
MP3730	2018-05-23	2017-07-04	after	NT-0361	region33	Cluster17	no	WT	Lys76Thr	CVIET	Ala220Ser,Gln271Glu,Asn326Ser,Ile356Thr,Arg371Ile	Lys541Asn,Phe313Ser
MP3486	2018-06-04	na	na	MM-11004	region30	Cluster17	no	WT	Lys76Thr	CVIET	Ala220Ser,Gln271Glu,Asn326Ser,Ile356Thr,Arg371Ile	Lys541Asn,Phe313Ser
MP3512	2018-06-04	2017-06-24	after	MM-0363A	region33	Cluster17	no	WT	Lys76Thr	CVIET	Ala220Ser,Gln271Glu,Asn326Ser,Ile356Thr,Arg371Ile	Lys541Asn,Phe313Ser
MP4032	2018-07-10	2017-06-24	after	MM-0363A	region33	Cluster17	YES-2018	WT	Lys76Thr	CVIET	Ala220Ser,Gln271Glu,Asn326Ser,Ile356Thr,Arg371Ile	Lys541Asn,Phe313Ser
MP4015	2018-07-12	2017-07-04	after	NT-0361	region33	Cluster17	no	WT	Lys76Thr	CVIET	Ala220Ser,Gln271Glu,Asn326Ser,Ile356Thr,Arg371Ile	Lys541Asn,Phe313Ser
MP4044	2018-07-14	2017-06-24	after	MM-0363A	region33	Cluster17	no	WT	Lys76Thr	CVIET	Ala220Ser,Gln271Glu,Asn326Ser,Ile356Thr,Arg371Ile	Lys541Asn,Phe313Ser
MP1384	2017-06-19	na	na	KT-0278	region32	Cluster18	no	WT	Lys76Thr	CVIET	Ala220Ser,Gln271Glu,Asn326Ser,Ile356Thr,Arg371Ile	Ser258Leu
MP1586	2017-06-19	2017-06-24	before	MM-0363A	region33	Cluster18	no	WT	Lys76Thr	CVIET	Ala220Ser,Gln271Glu,Asn326Ser,Ile356Thr,Arg371Ile	Ser258Leu
MP1970	2017-11-02	2017-07-11	after	WM-0367	region35	Cluster18	no	WT	Lys76Thr	CVIET	Ala220Ser,Gln271Glu,Asn326Ser,Ile356Thr,Arg371Ile	Ser258Leu
MP1968	2017-11-14	2017-07-11	after	WM-0367	region35	Cluster18	no	WT	Lys76Thr	CVIET	Ala220Ser,Gln271Glu,Asn326Ser,Ile356Thr,Arg371Ile	Ser258Leu
MP2415	2017-12-25	2017-07-11	after	WM-0367	region35	Cluster18	no	WT	Lys76Thr	CVIET	Ala220Ser,Gln271Glu,Asn326Ser,Ile356Thr,Arg371Ile	Ser258Leu
MP2407	2017-12-26	2017-07-03	after	HG-0369	region35	Cluster18	no	WT	Lys76Thr	CVIET	Ala220Ser,Gln271Glu,Asn326Ser,Ile356Thr,Arg371Ile	Ser258Leu
MP2379	2017-12-28	2017-07-11	after	WM-0367	region35	Cluster18	YES-2017	WT	Lys76Thr	CVIET	Ala220Ser,Gln271Glu,Asn326Ser,Ile356Thr,Arg371Ile	Ser258Leu
MP2413	2017-12-28	2017-07-11	after	WM-0367	region35	Cluster18	no	WT	Lys76Thr	CVIET	Ala220Ser,Gln271Glu,Asn326Ser,Ile356Thr,Arg371Ile	Ser258Leu
MP2425	2017-12-28	2017-07-11	after	WM-0367	region35	Cluster18	no	WT	Lys76Thr	CVIET	Ala220Ser,Gln271Glu,Asn326Ser,Ile356Thr,Arg371Ile	Ser258Leu
MP2459	2017-12-28	2017-07-11	after	WM-0367	region35	Cluster18	no	NA	Lys76Thr	CVIET	Ala220Ser,Gln271Glu,Asn326Ser,Ile356Thr,Arg371Ile	Ser258Leu
MP2575	2018-01-08	2017-07-04	after	NT-0361	region33	Cluster18	no	WT	Lys76Thr	CVIET	Ala220Ser,Gln271Glu,Asn326Ser,Ile356Thr,Arg371Ile	Ser258Leu
MP2448	2018-01-17	2017-07-11	after	WM-0367	region35	Cluster18	no	WT	Lys76Thr	CVIET	Ala220Ser,Gln271Glu,Asn326Ser,Ile356Thr,Arg371Ile	Ser258Leu
MP2829	2018-01-29	2017-07-11	after	WM-0367	region35	Cluster18	no	WT	Lys76Thr	CVIET	Ala220Ser,Gln271Glu,Asn326Ser,Ile356Thr,Arg371Ile	Ser258Leu
MP2972	2018-01-31	2017-07-04	after	NT-0361	region33	Cluster18	no	WT	Lys76Thr	CVIET	Ala220Ser,Gln271Glu,Asn326Ser,Ile356Thr,Arg371Ile	Ser258Leu
MP2990	2018-01-31	2017-06-24	after	MM-0363A	region33	Cluster18	no	WT	Lys76Thr	CVIET	Ala220Ser,Gln271Glu,Asn326Ser,Ile356Thr,Arg371Ile	Ser258Leu
MP2925	2018-02-07	na	na	KL-11013	region35	Cluster18	no	WT	Lys76Thr	CVIET	Ala220Ser,Gln271Glu,Asn326Ser,Ile356Thr,Arg371Ile	Ser258Leu
MP2894	2018-02-08	2017-07-03	after	HG-0369	region35	Cluster18	no	WT	Lys76Thr	CVIET	Ala220Ser,Gln271Glu,Asn326Ser,Ile356Thr,Arg371Ile	Ser258Leu
MP2812	2018-02-16	2016-04-13	after	TK-0376	region34	Cluster18	no	WT	Lys76Thr	CVIET	Ala220Ser,Ile356Thr	Ser258Leu
MP3074	2018-03-13	2016-04-13	after	TK-0376	region34	Cluster18	no	NA	Lys76Thr	CVIET	Ala220Ser,Gln271Glu,Ile356Thr,Arg371Ile	na
MP3613	2018-05-26	na	na	DB-0145B	region10	Cluster18	no	WT	Lys76Thr	CVIET	Ala220Ser,Gln271Glu,Asn326Ser,Ile356Thr,Arg371Ile	Ser258Leu
MP3525	2018-06-14	na	na	MM-11004	region30	Cluster18	no	WT	Lys76Thr	CVIET	Ala220Ser,Gln271Glu,Asn326Ser,Ile356Thr,Arg371Ile	Ser258Leu
MP4018	2018-06-27	2017-06-24	after	MM-0363A	region33	Cluster18	no	NA	Lys76Thr	CVIET	Ala220Ser,Gln271Glu,Asn326Ser	Ser258Leu
MP4059	2018-06-27	2017-06-24	after	MM-0363A	region33	Cluster18	no	WT	Lys76Thr	CVIET	Ala220Ser,Gln271Glu,Asn326Ser,Ile356Thr,Arg371Ile	Ser258Leu
MP4386	2018-12-07	2015-09-12	after	LN-0163A	region10	Cluster18	YES-2018	WT	Lys76Thr	CVIET	Ala220Ser,Gln271Glu,Asn326Ser,Ile356Thr,Arg371Ile	Ser258Leu
MP4514	2019-04-25	na	na	DB-0145B	region10	Cluster18	YES-2019	WT	Lys76Thr	CVIET	Ala220Ser,Gln271Glu,Asn326Ser,Ile356Thr,Arg371Ile	Ser258Leu
MP0231	2016-01-07	na	na	DB-0145B	region10	Cluster19	no	M476I.wt.mix	Lys76Thr	CVIET	Ala220Ser,Gln271Glu,Asn326Ser,Ile356Thr,Arg371Ile	Lys541Asn,Phe313Ser
MP0209	2016-06-20	na	na	HB-0340A	region28	Cluster19	YES-2016	M476I	Lys76Thr	CVIET	Ala220Ser,Gln271Glu,Asn326Ser,Ile356Thr,Arg371Ile	Lys541Asn,Phe313Ser
MP0221	2016-06-30	2016-09-03	before	WT-0314A	region14	Cluster19	no	M476I	Lys76Thr	CVIET	Ala220Ser,Gln271Glu,Asn326Ser,Ile356Thr,Arg371Ile	Lys541Asn,Phe313Ser
MP0103	2016-07-15	na	na	NB-11054A	region19	Cluster19	no	M476I	Lys76Thr	CVIET	Ala220Ser,Gln271Glu,Asn326Ser,Ile356Thr,Arg371Ile	Lys541Asn,Phe313Ser
MP0081	2016-07-20	na	na	NB-11054A	region19	Cluster19	no	M476I	Lys76Thr	CVIET	Ala220Ser,Gln271Glu,Asn326Ser,Ile356Thr,Arg371Ile	Lys541Asn,Phe313Ser
MP0095	2016-07-20	2020-05-02	before	LH-0266B	region13	Cluster19	no	M476I	Lys76Thr	CVIET	Ala220Ser,Gln271Glu,Asn326Ser,Ile356Thr,Arg371Ile	Lys541Asn,Phe313Ser
MP0115	2016-10-07	na	na	WT-11053A	region14	Cluster19	no	M476I	Lys76Thr	CVIET	Ala220Ser,Gln271Glu,Asn326Ser,Ile356Thr,Arg371Ile	Lys541Asn,Phe313Ser
MP1036	2016-11-03	na	na	PP-11050A	region14	Cluster19	no	M476I	Lys76Thr	CVIET	Ala220Ser,Gln271Glu,Asn326Ser,Ile356Thr,Arg371Ile	Lys541Asn,Phe313Ser
MP0469	2016-11-17	na	na	TM-0308	region14	Cluster19	no	M476I	Lys76Thr	CVIET	Ala220Ser,Gln271Glu,A/G,Ile356Thr,Arg371Ile	Lys541Asn,Phe313Ser
MP0590	2017-01-03	na	na	KT-0346B	region19	Cluster19	no	M476I	Lys76Thr	CVIET	Ala220Ser,Gln271Glu,Asn326Ser,Ile356Thr,Arg371Ile	Lys541Asn,Phe313Ser
MP0752	2017-01-10	na	na	PP-11050A	region14	Cluster19	no	M476I	Lys76Thr	CVIET	Ala220Ser,Gln271Glu,Asn326Ser,Ile356Thr,Arg371Ile	Phe313Ser
MP0822	2017-01-25	na	na	TM-0308	region14	Cluster19	no	M476I	Lys76Thr	CVIET	Ala220Ser,Gln271Glu,Asn326Ser,Ile356Thr,Arg371Ile	Lys541Asn,Phe313Ser
MP0762	2017-01-30	na	na	PP-11050A	region14	Cluster19	no	M476I	Lys76Thr	CVIET	Ala220Ser,Gln271Glu,Asn326Ser,Ile356Thr,Arg371Ile	Lys541Asn,Phe313Ser
MP0939	2017-02-27	na	na	PP-11050A	region14	Cluster19	no	M476I	Lys76Thr	CVIET	Ala220Ser,Gln271Glu,Asn326Ser,Arg371Ile	Lys541Asn,Phe313Ser
MP0960	2017-02-27	na	na	CK-11052A	region14	Cluster19	no	M476I	Lys76Thr	CVIET	Ala220Ser,Gln271Glu,Asn326Ser,Ile356Thr,Arg371Ile	Lys541Asn,Phe313Ser
MP0973	2017-03-07	na	na	PP-11050A	region14	Cluster19	no	M476I.wt.mix	Lys76Thr	CVIET	Ala220Ser,Gln271Glu,Asn326Ser,Ile356Thr,Arg371Ile	Lys541Asn,Phe313Ser
MP1239	2017-05-14	na	na	CK-11052A	region14	Cluster19	no	M476I	Lys76Thr	CVIET	Ala220Ser,Gln271Glu,Asn326Ser,Ile356Thr,Arg371Ile	Lys541Asn,Phe313Ser
MP1881	2017-10-17	na	na	ML-0380A	region24	Cluster19	no	M476I	Lys76Thr	CVIET	Ala220Ser,Gln271Glu,Asn326Ser,Ile356Thr,Arg371Ile	Lys541Asn,Phe313Ser
MP1912	2017-10-17	na	na	ML-0380A	region24	Cluster19	YES-2017	M476I	Lys76Thr	CVIET	Ala220Ser,Gln271Glu,Asn326Ser,Ile356Thr,Arg371Ile	Lys541Asn,Phe313Ser
MP2198	2017-12-04	na	na	DK-11049A	region47	Cluster19	no	M476I	Lys76Thr	CVIET	Ala220Ser,Gln271Glu,Asn326Ser,Ile356Thr,Arg371Ile	Lys541Asn,Phe313Ser
MP2851	2018-01-25	na	na	CK-11052A	region14	Cluster19	no	M476I	Lys76Thr	CVIET	Ala220Ser,Gln271Glu,Asn326Ser,Ile356Thr,Arg371Ile	Lys541Asn,Phe313Ser
MP2847	2018-02-05	2016-03-19	after	MH-0348A	region47	Cluster19	YES-2018	M476I	Lys76Thr	CVIET	Ala220Ser,Gln271Glu,Asn326Ser,Ile356Thr,Arg371Ile	Lys541Asn,Phe313Ser
MP3409	2018-04-23	2016-03-19	after	MH-0348A	region47	Cluster19	no	M476I	Lys76Thr	CVIET	Ala220Ser,Gln271Glu,Asn326Ser,Ile356Thr,Arg371Ile	Lys541Asn,Phe313Ser
MP3620	2018-05-28	na	na	WK-231B	region11	Cluster19	no	M476I	Lys76Thr	CVIET	Ala220Ser,Gln271Glu,Asn326Ser,Ile356Thr,Arg371Ile	Lys541Asn,Phe313Ser
MP4092	2018-06-20	2016-10-10	after	PP-11700A	region16	Cluster19	no	M476I	Lys76Thr	CVIET	Ala220Ser,Gln271Glu,Asn326Ser,Ile356Thr,Arg371Ile	Lys541Asn,Phe313Ser
MP4737	2019-03-11	na	na	MT-0342A	region21	Cluster20	no	P441L	Lys76Thr	CVIET	Ala220Ser,Gln271Glu,Asn326Ser,Ile356Thr,Arg371Ile	Lys541Asn,Phe313Ser
MP4738	2019-03-13	na	na	MT-0342A	region21	Cluster20	no	P441L	Lys76Thr	CVIET	Ala220Ser,Gln271Glu,Asn326Ser,Ile356Thr,Arg371Ile	Lys541Asn,Phe313Ser
MP4597	2019-06-05	na	na	MT-0342A	region21	Cluster20	no	P441L	Lys76Thr	CVIET	Ala220Ser,Gln271Glu,Asn326Ser,Ile356Thr,Arg371Ile	Lys541Asn,Phe313Ser
MP4602	2019-06-06	na	na	MT-0342A	region21	Cluster20	no	P441L	Lys76Thr	CVIET	Ala220Ser,Gln271Glu,Asn326Ser,Ile356Thr,Arg371Ile	Lys541Asn,Phe313Ser
MP4606	2019-06-06	na	na	NW-0325A	region21	Cluster20	no	P441L	Lys76Thr	CVIET	Ala220Ser,Gln271Glu,Asn326Ser,Ile356Thr,Arg371Ile	Lys541Asn,Phe313Ser
MP4558	2019-06-10	2016-03-18	after	DH-0315A	region21	Cluster20	no	NA	Lys76Thr	CVIET	Ala220Ser,Gln271Glu,Asn326Ser,Arg371Ile	Phe313Ser
MP4577	2019-06-10	na	na	WW-0381	region26	Cluster20	no	P441L	Lys76Thr	CVIET	Ala220Ser,Gln271Glu,Asn326Ser,Ile356Thr,Arg371Ile	Lys541Asn,Phe313Ser
MP4584	2019-06-10	na	na	MT-0342A	region21	Cluster20	no	P441L	Lys76Thr	CVIET	Ala220Ser,Gln271Glu,Asn326Ser,Ile356Thr,Arg371Ile	Lys541Asn,Phe313Ser
MP4568	2019-06-11	na	na	MT-0342A	region21	Cluster20	no	NA	Lys76Thr	CVIET	Ala220Ser,Asn326Ser,Arg371Ile	Lys541Asn,Phe313Ser
MP4559	2019-06-13	na	na	NW-0325A	region21	Cluster20	no	P441L	Lys76Thr	CVIET	Ala220Ser,Gln271Glu,Asn326Ser,Ile356Thr,Arg371Ile	Lys541Asn,Phe313Ser
MP4583	2019-06-13	na	na	KH-0346A	region19	Cluster20	no	P441L	Lys76Thr	CVIET	Ala220Ser,Gln271Glu,Asn326Ser,Ile356Thr,Arg371Ile	Lys541Asn,Phe313Ser
MP4593	2019-06-13	2016-08-31	after	PL-0366	region26	Cluster20	no	P441L	Lys76Thr	CVIET	Ala220Ser,Gln271Glu,Asn326Ser,Ile356Thr,Arg371Ile	Lys541Asn,Phe313Ser
MP4594	2019-06-15	2016-08-31	after	PL-0366	region26	Cluster20	no	P441L	Lys76Thr	CVIET	Ala220Ser,Gln271Glu,Asn326Ser,Ile356Thr,Arg371Ile	Lys541Asn,Phe313Ser
MP4563	2019-06-18	na	na	NW-0325A	region21	Cluster20	no	P441L	Lys76Thr	CVIET	Ala220Ser,Gln271Glu,Asn326Ser,Ile356Thr,Arg371Ile	Lys541Asn,Phe313Ser
MP4636	2019-06-19	2016-03-18	after	DH-0315A	region21	Cluster20	no	P441L	Lys76Thr	CVIET	Ala220Ser,Gln271Glu,Asn326Ser,Ile356Thr,Arg371Ile	Lys541Asn,Phe313Ser
MP4604	2019-06-21	na	na	KH-0346A	region19	Cluster20	no	P441L	Lys76Thr	CVIET	Ala220Ser,Gln271Glu,Asn326Ser,Ile356Thr,Arg371Ile	Lys541Asn,Phe313Ser
MP4676	2019-06-25	2016-03-18	after	DH-0315A	region21	Cluster20	no	P441L	Lys76Thr	CVIET	Ala220Ser,Gln271Glu,Asn326Ser,Ile356Thr,Arg371Ile	Lys541Asn,Phe313Ser
MP4665	2019-06-27	na	na	CK-298B	region15	Cluster20	no	P441L	Lys76Thr	CVIET	Ala220Ser,Gln271Glu,Asn326Ser,Ile356Thr,Arg371Ile	Lys541Asn,Phe313Ser
MP4685	2019-07-02	na	na	HN-0337A	region21	Cluster20	YES-2019	P441L	Lys76Thr	CVIET	Ala220Ser,Gln271Glu,Asn326Ser,Ile356Thr,Arg371Ile	Lys541Asn,Phe313Ser
MP4667	2019-07-04	na	na	MT-0342A	region21	Cluster20	no	P441L	Lys76Thr	CVIET	Ala220Ser,Gln271Glu,Asn326Ser,Ile356Thr,Arg371Ile	Lys541Asn,Phe313Ser
MP4655	2019-07-08	na	na	CK-298B	region15	Cluster20	no	P441L	Lys76Thr	CVIET	Ala220Ser,Gln271Glu,Asn326Ser,Ile356Thr,Arg371Ile	Lys541Asn,Phe313Ser
MP4684	2019-07-08	na	na	MT-0342A	region21	Cluster20	no	P441L	Lys76Thr	CVIET	Ala220Ser,Gln271Glu,Asn326Ser,Ile356Thr,Arg371Ile	Lys541Asn,Phe313Ser
MP4686	2019-07-13	na	na	MT-0342A	region21	Cluster20	no	P441L	Lys76Thr	CVIET	Ala220Ser,Gln271Glu,Asn326Ser,Ile356Thr,Arg371Ile	Lys541Asn,Phe313Ser
MP1890	2017-09-19	na	na	WW-0381	region26	Cluster21	no	WT	Lys76Thr	CVIET	Ala220Ser,Gln271Glu,Asn326Ser,Ile356Thr,Arg371Ile	Lys541Asn,Phe313Ser
MP2231	2017-12-05	na	na	WW-0381	region26	Cluster21	no	WT	Lys76Thr	CVIET	Ala220Ser,Gln271Glu,Asn326Ser,Ile356Thr,Arg371Ile	Lys541Asn,Phe313Ser
MP2207	2017-12-06	na	na	WW-0381	region26	Cluster21	no	WT	Lys76Thr	CVIET	Ala220Ser,Gln271Glu,Asn326Ser,Ile356Thr,Arg371Ile	Lys541Asn,Phe313Ser
MP3407	2017-12-11	na	na	HN-0337A	region21	Cluster21	no	WT	Lys76Thr	CVIET	Ala220Ser,Gln271Glu,Arg371Ile	Lys541Asn,Phe313Ser
MP3404	2017-12-12	na	na	HN-0337A	region21	Cluster21	no	WT	Lys76Thr	CVIET	Ala220Ser,Gln271Glu,Asn326Ser,Ile356Thr,Arg371Ile	Lys541Asn,Phe313Ser
MP2729	2017-12-13	na	na	BN-0373A	region26	Cluster21	YES-2017	WT	Lys76Thr	CVIET	Ala220Ser,Gln271Glu,Asn326Ser,Ile356Thr,Arg371Ile	Lys541Asn,Phe313Ser
MP2745	2017-12-18	na	na	KK-0349A	region19	Cluster21	no	WT	Lys76Thr	CVIET	Ala220Ser,Gln271Glu,Asn326Ser,Ile356Thr,Arg371Ile	Lys541Asn,Phe313Ser
MP2720	2017-12-19	na	na	MT-0342A	region21	Cluster21	no	WT	Lys76Thr	CVIET	Ala220Ser,Gln271Glu,Asn326Ser,Ile356Thr,Arg371Ile	Lys541Asn,Phe313Ser
MP2381	2017-12-22	2016-08-31	after	PL-0366	region26	Cluster21	no	WT	Lys76Thr	CVIET	Ala220Ser,Gln271Glu,Asn326Ser,Ile356Thr,Arg371Ile	Lys541Asn,Phe313Ser
MP2676	2017-12-23	na	na	HB-0340A	region28	Cluster21	no	NA	Lys76Thr	CVIET	Ala220Ser,Asn326Ser,Ile356Thr,Arg371Ile	Lys541Asn,Phe313Ser
MP2728	2017-12-25	2016-08-31	after	PL-0366	region26	Cluster21	no	WT	Lys76Thr	CVIET	Ala220Ser,Gln271Glu,Asn326Ser,Ile356Thr,Arg371Ile	Lys541Asn,Phe313Ser
MP2788	2018-02-03	na	na	MT-0342A	region21	Cluster21	no	WT	Lys76Thr	CVIET	Ala220Ser,Gln271Glu,Asn326Ser,Ile356Thr,Arg371Ile	Lys541Asn,Phe313Ser
MP2853	2018-02-13	na	na	MT-0342A	region21	Cluster21	YES-2018	WT	Lys76Thr	CVIET	Ala220Ser,Gln271Glu,Asn326Ser,Ile356Thr,Arg371Ile	Lys541Asn,Phe313Ser
MP2873	2018-02-13	na	na	PN-11048	region21	Cluster21	no	WT	Lys76Thr	CVIET	Ala220Ser,Gln271Glu,Asn326Ser,Ile356Thr,Arg371Ile	Lys541Asn,Phe313Ser
MP3235	2018-02-13	na	na	HB-0320A	region21	Cluster21	no	NA	Lys76Thr	CVIET	Ala220Ser,Gln271Glu,Asn326Ser,Ile356Thr,Arg371Ile	Lys541Asn,Phe313Ser
MP3219	2018-02-17	2016-08-31	after	PL-0366	region26	Cluster21	no	WT	Lys76Thr	CVIET	Ala220Ser,Gln271Glu,Asn326Ser,Ile356Thr,Arg371Ile	Lys541Asn,Phe313Ser
MP3056	2018-02-26	2016-08-31	after	PL-0366	region26	Cluster21	no	WT	Lys76Thr	CVIET	Ala220Ser,Gln271Glu,Asn326Ser,Ile356Thr,Arg371Ile	Lys541Asn,Phe313Ser
MP3206	2018-03-12	na	na	MT-0342A	region21	Cluster21	no	WT	Lys76Thr	CVIET	Gln271Glu,Ile356Thr,Arg371Ile	Phe313Ser
MP4072	2018-06-25	2020-05-02	before	LH-0266B	region13	Cluster21	no	WT	Lys76Thr	CVIET	Ala220Ser,Gln271Glu,Asn326Ser,Ile356Thr,Arg371Ile	Lys541Asn,Phe313Ser
MP4080	2018-07-11	na	na	WW-0381	region26	Cluster21	no	WT	Lys76Thr	CVIET	Ala220Ser,Gln271Glu,Asn326Ser,Ile356Thr,Arg371Ile	Lys541Asn,Phe313Ser
MP4105	2018-07-17	na	na	WW-0381	region26	Cluster21	no	WT	Lys76Thr	CVIET	Ala220Ser,Gln271Glu,Ile356Thr,Arg371Ile	Lys541Asn,Phe313Ser
MP1417	2017-06-05	2016-03-18	after	DH-0315A	region21	Cluster22	YES-2017	WT	Lys76Thr	CVIET	Ala220Ser,Gln271Glu,Asn326Ser,Ile356Thr,Arg371Ile	Phe313Ser,Ser258Leu
MP1257	2017-06-24	na	na	LK-0319A	region21	Cluster22	no	WT	Lys76Thr	CVIET	Gln271Glu	Phe313Ser,Ser258Leu
MP1657	2017-06-29	na	na	LK-0319A	region21	Cluster22	no	WT	Lys76Thr	CVIET	Ala220Ser,Gln271Glu,Asn326Ser,Ile356Thr,Arg371Ile	Phe313Ser,Ser258Leu
MP1735	2017-07-17	na	na	PP-0338A	region19	Cluster22	no	WT	Lys76Thr	CVIET	Ala220Ser,Gln271Glu,Asn326Ser,Ile356Thr,Arg371Ile	Phe313Ser,Ser258Leu
MP1071	2017-08-25	2016-03-14	after	HR-0318A	region21	Cluster22	no	WT	Lys76Thr	CVIET	Ala220Ser,Gln271Glu,Asn326Ser,Ile356Thr,Arg371Ile	Phe313Ser,Ser258Leu
MP2711	2017-12-25	na	na	HB-0320A	region21	Cluster22	no	WT	Lys76Thr	CVIET	Ala220Ser,Gln271Glu,Asn326Ser,Ile356Thr,Arg371Ile	Phe313Ser,Ser258Leu
MP2860	2018-01-22	2016-03-14	after	HR-0318A	region21	Cluster22	YES-2018	WT	Lys76Thr	CVIET	Ala220Ser,Gln271Glu,Asn326Ser,Ile356Thr,Arg371Ile	Phe313Ser,Ser258Leu
MP2943	2018-01-24	2016-03-14	after	HR-0318A	region21	Cluster22	no	WT	Lys76Thr	CVIET	Ala220Ser,Gln271Glu,Asn326Ser,Ile356Thr,Arg371Ile	Phe313Ser,Ser258Leu
MP2911	2018-02-01	2016-03-18	after	DH-0315A	region21	Cluster22	no	WT	Lys76Thr	CVIET	Ala220Ser,Gln271Glu,Asn326Ser,Ile356Thr,Arg371Ile	Phe313Ser,Ser258Leu
MP2855	2018-02-05	2016-03-14	after	HR-0318A	region21	Cluster22	no	WT	Lys76Thr	CVIET	Ala220Ser,Gln271Glu,Asn326Ser,Ile356Thr	Phe313Ser,Ser258Leu
MP2789	2018-02-13	na	na	NW-0325A	region21	Cluster22	no	NA	Lys76Thr	CVIET	Ala220Ser,Gln271Glu,Asn326Ser,Ile356Thr,Arg371Ile	Phe313Ser,Ser258Leu
MP4103	2018-07-18	na	na	LK-0319A	region21	Cluster22	no	WT	Lys76Thr	CVIET	Ala220Ser,Gln271Glu,Asn326Ser,Ile356Thr,Arg371Ile	Phe313Ser,Ser258Leu
MP4607	2019-06-03	na	na	HB-0320A	region21	Cluster22	no	WT	Lys76Thr	CVIET	Ala220Ser,Gln271Glu,Asn326Ser,Ile356Thr,Arg371Ile	Phe313Ser,Ser258Leu
MP4569	2019-06-05	na	na	HB-0320A	region21	Cluster22	no	WT	Lys76Thr	CVIET	Ala220Ser,Gln271Glu,Asn326Ser,Ile356Thr,Arg371Ile	Phe313Ser,Ser258Leu
MP4648	2019-06-17	2016-03-18	after	DH-0315A	region21	Cluster22	no	WT	Lys76Thr	CVIET	Ala220Ser,Gln271Glu,Asn326Ser,Ile356Thr,Arg371Ile	Phe313Ser,Ser258Leu
MP4620	2019-06-18	na	na	LK-0319A	region21	Cluster22	no	WT	Lys76Thr	CVIET	Ala220Ser,Gln271Glu,Asn326Ser,Ile356Thr,Arg371Ile	Phe313Ser,Ser258Leu
MP4557	2019-06-21	na	na	NW-0325A	region21	Cluster22	no	WT	Lys76Thr	CVIET	Gln271Glu,Asn326Ser,Ile356Thr,Arg371Ile	Phe313Ser,Ser258Leu
MP4677	2019-06-26	2016-03-18	after	DH-0315A	region21	Cluster22	no	WT	Lys76Thr	CVIET	Ala220Ser,Gln271Glu,Asn326Ser,Ile356Thr,Arg371Ile	Phe313Ser,Ser258Leu
MP4674	2019-06-27	2016-03-18	after	DH-0315A	region21	Cluster22	no	WT	Lys76Thr	CVIET	Ala220Ser,Gln271Glu,Asn326Ser,Ile356Thr,Arg371Ile	Phe313Ser,Ser258Leu
MP4691	2019-07-15	na	na	HB-0320A	region21	Cluster22	YES-2019	WT	Lys76Thr	CVIET	Ala220Ser,Gln271Glu,Asn326Ser,Ile356Thr,Arg371Ile	Phe313Ser,Ser258Leu
MP4154	2018-10-08	2017-07-03	after	HG-0369	region35	Cluster23	no	WT	Lys76Thr	CVIET	Ala220Ser,Gln271Glu,Asn326Ser,Ile356Thr,Arg371Ile	Gly308Glu,Ser258Leu
MP4195	2018-10-25	na	na	PS-11064A	region30	Cluster23	no	NA	Lys76Thr	CVIET	Ala220Ser,Gln271Glu,Ile356Thr,Arg371Ile	Gly308Glu,Ser258Leu
MP4375	2018-11-29	na	na	KP-0344B	region28	Cluster23	no	WT	Lys76Thr	CVIET	Ala220Ser,Gln271Glu,Asn326Ser,Ile356Thr,Arg371Ile	Gly308Glu,Ser258Leu
MP4395	2018-11-29	na	na	PS-11064A	region30	Cluster23	no	WT	Lys76Thr	CVIET	Ala220Ser,Gln271Glu,Asn326Ser,Ile356Thr,Arg371Ile	Gly308Glu,Ser258Leu
MP4337	2018-11-30	na	na	PH-0356B	region31	Cluster23	no	WT	Lys76Thr	CVIET	Ala220Ser,Gln271Glu,Asn326Ser,Ile356Thr,Arg371Ile	Gly308Glu,Ser258Leu
MP4330	2018-12-05	na	na	KP-0344B	region28	Cluster23	no	WT	Lys76Thr	CVIET	Ala220Ser,Gln271Glu,Asn326Ser,Ile356Thr,Arg371Ile	Gly308Glu,Ser258Leu
MP4365	2018-12-18	na	na	PS-11064A	region30	Cluster23	no	WT	Lys76Thr	CVIET	Ala220Ser,Gln271Glu,Asn326Ser,Ile356Thr,Arg371Ile	Gly308Glu,Ser258Leu
MP4378	2018-12-18	na	na	PS-11064A	region30	Cluster23	YES-2018	WT	Lys76Thr	CVIET	Ala220Ser,Gln271Glu,Asn326Ser,Ile356Thr,Arg371Ile	Gly308Glu,Ser258Leu
MP4225	2018-12-24	na	na	PS-11064A	region30	Cluster23	no	WT	Lys76Thr	CVIET	Ala220Ser,Gln271Glu,Asn326Ser,Ile356Thr,Arg371Ile	Gly308Glu,Ser258Leu
MP4266	2018-12-26	na	na	PS-11064A	region30	Cluster23	no	WT	Lys76Thr	CVIET	Ala220Ser,Gln271Glu,Asn326Ser,Ile356Thr,Arg371Ile	Gly308Glu,Ser258Leu
MP4235	2019-01-02	na	na	PS-11064A	region30	Cluster23	no	WT	Lys76Thr	CVIET	Ala220Ser,Gln271Glu,Asn326Ser,Ile356Thr,Arg371Ile	Gly308Glu,Ser258Leu
MP4236	2019-01-02	na	na	PS-11064A	region30	Cluster23	no	WT	Lys76Thr	CVIET	Ala220Ser,Gln271Glu,Asn326Ser,Ile356Thr,Arg371Ile	Gly308Glu,Ser258Leu
MP4373	2019-01-10	na	na	PS-11064A	region30	Cluster23	YES-2019	WT	Lys76Thr	CVIET	Ala220Ser,Gln271Glu,Asn326Ser,Ile356Thr,Arg371Ile	Gly308Glu,Ser258Leu
MP4222	2019-01-24	na	na	PH-0356A	region31	Cluster23	no	WT	Lys76Thr	CVIET	Ala220Ser,Gln271Glu,Asn326Ser,Ile356Thr,Arg371Ile	Gly308Glu,Ser258Leu
MP4531	2019-04-30	na	na	PG-0424A	region34	Cluster23	no	WT	Lys76Thr	CVIET	Asn326Ser,Ile356Thr,Arg371Ile	Gly308Glu,Ser258Leu
MP4522	2019-05-17	na	na	MC-0393B	region24	Cluster23	no	WT	Lys76Thr	CVIET	Ala220Ser,Gln271Glu,Asn326Ser,Ile356Thr,Arg371Ile	Gly308Glu,Ser258Leu
MP4538	2019-05-19	na	na	KL-0394	region35	Cluster23	no	NA	Lys76Thr	CVIET	Ala220Ser,Gln271Glu,Asn326Ser,Ile356Thr,Arg371Ile	Gly308Glu,Ser258Leu
MP4760	2019-09-23	na	na	KP-0344B	region28	Cluster23	no	WT	Lys76Thr	CVIET	Ala220Ser,Gln271Glu,Asn326Ser,Ile356Thr,Arg371Ile	Gly308Glu,Ser258Leu
MP4806	2019-12-04	2017-07-04	after	LK-0350	region33	Cluster23	no	WT	Lys76Thr	CVIET	Ala220Ser,Gln271Glu,Asn326Ser,Ile356Thr,Arg371Ile	Gly308Glu,Ser258Leu
MP1566	2017-05-05	2017-07-04	before	TP-0339	region33	Cluster24	no	F446I	Lys76Thr	CVIET	Ala220Ser,Gln271Glu,Asn326Ser,Ile356Thr,Arg371Ile	Lys541Asn,Phe313Ser
MP1575	2017-05-17	2017-07-04	before	TP-0339	region33	Cluster24	no	F446I	Lys76Thr	CVIET	Ala220Ser,Gln271Glu,Asn326Ser,Ile356Thr,Arg371Ile	Lys541Asn,Phe313Ser
MP1389	2017-06-05	na	na	KL-11013	region35	Cluster24	no	F446I	Lys76Thr	CVIET	Ala220Ser,Gln271Glu,Ile356Thr,Arg371Ile	Lys541Asn,Phe313Ser
MP1532	2017-06-07	2017-06-24	before	MM-0363A	region33	Cluster24	no	F446I	Lys76Thr	CVIET	Ala220Ser,Gln271Glu,Ile356Thr,Arg371Ile	Phe313Ser
MP1256	2017-06-13	2017-06-24	before	MM-0363A	region33	Cluster24	no	F446I	Lys76Thr	CVIET	Ala220Ser,Gln271Glu,Asn326Ser,Ile356Thr,Arg371Ile	Lys541Asn,Phe313Ser
MP1641	2017-07-08	2017-07-11	before	WM-0367	region35	Cluster24	no	F446I	Lys76Thr	CVIET	Ala220Ser,Gln271Glu,Asn326Ser,Ile356Thr,Arg371Ile	Lys541Asn,Phe313Ser
MP1125	2017-08-12	na	na	NK-0403	region35	Cluster24	no	F446I	Lys76Thr	CVIET	Ala220Ser,Gln271Glu,Asn326Ser,Ile356Thr,Arg371Ile	Lys541Asn,Phe313Ser
MP2024	2017-10-01	na	na	KL-11013	region35	Cluster24	YES-2017	F446I	Lys76Thr	CVIET	Ala220Ser,Gln271Glu,Asn326Ser,Ile356Thr,Arg371Ile	Lys541Asn,Phe313Ser
MP2012	2017-11-02	na	na	KL-0268E	region25	Cluster24	no	F446I	Lys76Thr	CVIET	Ala220Ser,Gln271Glu,Asn326Ser,Ile356Thr,Arg371Ile	Lys541Asn,Phe313Ser
MP2008	2017-11-08	na	na	MK-11003	region25	Cluster24	no	F446I	Lys76Thr	CVIET	Ala220Ser,Gln271Glu,Asn326Ser,Ile356Thr,Arg371Ile	Lys541Asn,Phe313Ser
MP3392	2017-12-19	na	na	MK-11014	region32	Cluster24	no	F446I	Lys76Thr	CVIET	Ala220Ser,Gln271Glu,Asn326Ser,Ile356Thr,Arg371Ile	Lys541Asn,Phe313Ser
MP2481	2017-12-30	na	na	MK-11003	region25	Cluster24	no	F446I	Lys76Thr	CVIET	Ala220Ser,Gln271Glu,Asn326Ser,Ile356Thr,Arg371Ile	Lys541Asn,Phe313Ser
MP2539	2018-01-03	na	na	MK-11003	region25	Cluster24	no	F446I	Lys76Thr	CVIET	Ala220Ser,Gln271Glu,Asn326Ser,Ile356Thr,Arg371Ile	Lys541Asn,Phe313Ser
MP2989	2018-01-25	na	na	MK-11003	region25	Cluster24	no	F446I	Lys76Thr	CVIET	Ala220Ser,Gln271Glu,Asn326Ser,Ile356Thr,Arg371Ile	Lys541Asn,Phe313Ser
MP2866	2018-01-27	2017-07-11	after	WM-0367	region35	Cluster24	YES-2018	F446I	Lys76Thr	CVIET	Ala220Ser,Gln271Glu,Asn326Ser,Ile356Thr,Arg371Ile	Lys541Asn,Phe313Ser
MP3812	2018-08-20	na	na	KL-11013	region35	Cluster24	no	F446I	Lys76Thr	CVIET	Ala220Ser,Gln271Glu,Asn326Ser,Ile356Thr,Arg371Ile	Phe313Ser
MP1979	2017-11-06	na	na	BB-0316	region32	Cluster25	no	C580Y	Lys76Thr	CVIET	Ala220Ser,Gln271Glu,Asn326Ser,Ile356Thr,Arg371Ile	Gly308Glu,Ser258Leu
MP1983	2017-11-07	na	na	BB-0316	region32	Cluster25	YES-2017	C580Y	Lys76Thr	CVIET	Ala220Ser,Gln271Glu,Asn326Ser,Ile356Thr,Arg371Ile	Gly308Glu,Ser258Leu
MP3744	2018-06-11	na	na	NT-12007	region39	Cluster25	no	C580Y	Lys76Thr	CVIET	Ala220Ser,Gln271Glu,Asn326Ser,Ile356Thr,Arg371Ile	Gly308Glu,Ser258Leu
MP3714	2018-06-19	na	na	HL-12004	region39	Cluster25	YES-2018	C580Y	Lys76Thr	CVIET	Ala220Ser,Gln271Glu,Asn326Ser,Ile356Thr,Arg371Ile	Gly308Glu,Ser258Leu
MP3702	2018-06-20	na	na	HL-12004	region39	Cluster25	no	C580Y	Lys76Thr	CVIET	Ala220Ser,Gln271Glu,Asn326Ser,Ile356Thr,Arg371Ile	Gly308Glu,Ser258Leu
MP3738	2018-06-22	na	na	MT-12140	region39	Cluster25	no	C580Y	Lys76Thr	CVIET	Ala220Ser,Gln271Glu,Asn326Ser,Ile356Thr,Arg371Ile	Gly308Glu,Ser258Leu
MP3710	2018-06-23	na	na	HL-12004	region39	Cluster25	no	C580Y	Lys76Thr	CVIET	Ala220Ser,Gln271Glu,Asn326Ser,Ile356Thr,Arg371Ile	Gly308Glu,Ser258Leu
MP3928	2018-06-23	2015-02-11	after	HM-0292	region32	Cluster25	no	C580Y	Lys76Thr	CVIET	Ala220Ser,Gln271Glu,Asn326Ser,Ile356Thr,Arg371Ile	Gly308Glu,Ser258Leu
MP3857	2018-07-02	na	na	HL-12004	region39	Cluster25	no	C580Y	na	na	Ala220Ser,Gln271Glu,Asn326Ser,Ile356Thr,	na
MP3843	2018-07-03	na	na	HL-12004	region39	Cluster25	no	C580Y	Lys76Thr	CVIET	Ala220Ser,Gln271Glu,Asn326Ser,Ile356Thr,Arg371Ile	Gly308Glu,Ser258Leu
MP3848	2018-07-10	na	na	MT-12140	region39	Cluster25	no	C580Y.wt.mix	Lys76Thr	CVIET	Ala220Ser,Gln271Glu,Asn326Ser,Ile356Thr,Arg371Ile	Gly308Glu,Ser258Leu
MP3772	2018-08-08	na	na	HL-12004	region39	Cluster25	no	C580Y.wt.mix	Lys76Thr	CVIET	Ala220Ser,Gln271Glu,Asn326Ser,Ile356Thr,Arg371Ile	Gly308Glu,Ser258Leu
MP3775	2018-08-08	na	na	HL-12004	region39	Cluster25	no	C580Y	Lys76Thr	CVIET	Ala220Ser,Gln271Glu,Asn326Ser,Ile356Thr,Arg371Ile	Gly308Glu,Ser258Leu
MP4209	2018-11-13	na	na	NT-12007	region39	Cluster25	no	C580Y	Lys76Thr	CVIET	Ala220Ser,Gln271Glu,Asn326Ser,Ile356Thr,Arg371Ile	Gly308Glu,Ser258Leu
MP4212	2018-11-14	na	na	NT-12007	region39	Cluster25	no	C580Y	Lys76Thr	CVIET	Ala220Ser,Gln271Glu,Asn326Ser,Ile356Thr,Arg371Ile	Gly308Glu,Ser258Leu
MP4446	2019-02-04	na	na	KT-0433	region38	Cluster25	YES-2019	C580Y	Lys76Thr	CVIET	Ala220Ser,Gln271Glu,Asn326Ser,Ile356Thr,Arg371Ile	Gly308Glu,Ser258Leu
METF.HRP.56	2016-06-23	na	na	HD-0363D	region30	Cluster26	no	WT	Lys76Thr	CVIET	Ala220Ser,Gln271Glu,Asn326Ser,Ile356Thr,Arg371Ile	Lys541Asn,Phe313Ser
MS0011	2016-06-23	2017-07-12	before	HD-0363D	region30	Cluster26	no	WT	Lys76Thr	CVIET	Ala220Ser,Gln271Glu,Ile356Thr	Lys541Asn,Phe313Ser
MP0296	2016-08-12	2016-03-14	after	PL-0327A	region30	Cluster26	no	WT	Lys76Thr	CVIET	Ala220Ser,Gln271Glu,Asn326Ser,Ile356Thr,Arg371Ile	Lys541Asn,Phe313Ser
MP0424	2016-10-03	2016-03-14	after	PL-0327A	region30	Cluster26	YES-2016	WT	na	na	Ile356Thr	Lys541Asn,Phe313Ser
MP1192	2017-05-03	2016-03-14	after	PL-0327A	region30	Cluster26	no	WT	Lys76Thr	CVIET	Ala220Ser,Gln271Glu,Asn326Ser,Ile356Thr,Arg371Ile	Lys541Asn,Phe313Ser
MP1142	2017-05-08	2016-03-14	after	PL-0327A	region30	Cluster26	no	WT	Lys76Thr	CVIET	Ala220Ser,Gln271Glu,Asn326Ser,Ile356Thr,Arg371Ile	Lys541Asn,Phe313Ser
MP1359	2017-06-08	2016-03-14	after	PL-0327A	region30	Cluster26	no	WT	Lys76Thr	CVIET	Ala220Ser,Gln271Glu,Asn326Ser,Ile356Thr,Arg371Ile	Lys541Asn,Phe313Ser
MP1322	2017-06-17	2016-03-14	after	PL-0327A	region30	Cluster26	YES-2017	WT	Lys76Thr	CVIET	Ala220Ser,Gln271Glu,Asn326Ser,Ile356Thr,Arg371Ile	Lys541Asn,Phe313Ser
MP1440	2017-06-20	2016-03-14	after	PL-0327A	region30	Cluster26	no	WT	na	na	Gln271Glu,Asn326Ser,Ile356Thr	Lys541Asn,Phe313Ser
MP1438	2017-06-22	2016-03-14	after	PL-0327A	region30	Cluster26	no	WT	Lys76Thr	CVIET	Ala220Ser,Gln271Glu,Asn326Ser,Ile356Thr,Arg371Ile	Phe313Ser
MP1582	2017-06-29	2016-03-14	after	PL-0327A	region30	Cluster26	no	WT	Lys76Thr	CVIET	Ala220Ser,Arg371Ile	Lys541Asn,Phe313Ser
MP1794	2017-08-22	2016-03-14	after	PL-0327A	region30	Cluster26	no	WT	Lys76Thr	CVIET	Ala220Ser,Gln271Glu,Asn326Ser,Ile356Thr	Lys541Asn,Phe313Ser
MP2963	2018-01-26	2016-03-14	after	PL-0327A	region30	Cluster26	YES-2018	WT	Lys76Thr	CVIET	Ala220Ser,Gln271Glu,Asn326Ser,Ile356Thr,Arg371Ile	Lys541Asn,Phe313Ser
MP3113	2018-04-02	2016-03-14	after	PL-0327A	region30	Cluster26	no	WT	Lys76Thr	CVIET	Ala220Ser,Gln271Glu,Asn326Ser,Ile356Thr,Arg371Ile	Lys541Asn,Phe313Ser
MP3510	2018-06-14	na	na	MN-268C	region25	Cluster26	no	WT	Lys76Thr	CVIET	Ala220Ser,Gln271Glu,Asn326Ser,Ile356Thr,Arg371Ile	Lys541Asn,Phe313Ser
MP3082	2018-06-09	na	na	KW-0473	region40	Cluster27	no	G533S	Lys76Thr	CVIET	Gln271Glu	Lys541Asn,Phe313Ser
MP3197	2018-06-09	na	na	KW-0473	region40	Cluster27	no	G533S.wt.mix	Lys76Thr	CVIET	Ala220Ser,Gln271Glu,Asn326Ser,Ile356Thr,Arg371Ile	Lys541Asn,Phe313Ser
MP3239	2018-06-17	na	na	KW-0473	region40	Cluster27	no	G533S	Lys76Thr	CVIET	Ala220Ser,Gln271Glu,Asn326Ser,Ile356Thr,Arg371Ile	Lys541Asn,Phe313Ser
MP3240	2018-06-17	na	na	KW-0473	region40	Cluster27	no	G533S	Lys76Thr	CVIET	Ala220Ser,Asn326Ser,Ile356Thr,Arg371Ile	Lys541Asn,Phe313Ser
MP3241	2018-06-17	na	na	KW-0473	region40	Cluster27	no	G533S.wt.mix	Lys76Thr	CVIET	Ala220Ser,Asn326Ser,Ile356Thr,Arg371Ile	Lys541Asn,Phe313Ser
MP3242	2018-06-17	na	na	KW-0473	region40	Cluster27	no	NA	Lys76Thr	CVIET	Ala220Ser,Gln271Glu,Asn326Ser,Ile356Thr,Arg371Ile	Lys541Asn,Phe313Ser
MP3844	2018-07-03	na	na	KW-0473	region40	Cluster27	no	G533S	Lys76Thr	CVIET	Ala220Ser,Gln271Glu,Asn326Ser,Ile356Thr,Arg371Ile	Lys541Asn,Phe313Ser
MP3855	2018-07-12	na	na	KW-0473	region40	Cluster27	no	G533S	Lys76Thr	CVIET	Ala220Ser,Gln271Glu,Asn326Ser,Ile356Thr,Arg371Ile	Lys541Asn,Phe313Ser
MP3830	2018-08-05	na	na	KW-0473	region40	Cluster27	YES-2018	G533S	Lys76Thr	CVIET	Ala220Ser,Gln271Glu,Asn326Ser,Ile356Thr,Arg371Ile	Lys541Asn,Phe313Ser
MP3770	2018-09-19	na	na	HK-0525	region41	Cluster27	no	G533S	Lys76Thr	CVIET	Ala220Ser,Gln271Glu,Asn326Ser,Ile356Thr,Arg371Ile	Lys541Asn,Phe313Ser
MP4153	2018-10-10	na	na	MT-0802	region40	Cluster27	no	G533S	Lys76Thr	CVIET	Ala220Ser,Gln271Glu,Asn326Ser,Ile356Thr,Arg371Ile	Lys541Asn,Phe313Ser
MP4244	2019-01-24	na	na	KW-0473	region40	Cluster27	no	G533S	Lys76Thr	CVIET	Ala220Ser,Gln271Glu,Asn326Ser,Ile356Thr,Arg371Ile	Lys541Asn,Phe313Ser
MP4709	2019-05-14	na	na	NT-12059	region42	Cluster27	YES-2019	G533S	Lys76Thr	CVIET	Ala220Ser,Gln271Glu,Asn326Ser,Ile356Thr,Arg371Ile	Lys541Asn,Phe313Ser
MP4710	2019-06-18	na	na	SP-0513	region41	Cluster27	no	G533S	Lys76Thr	CVIET	Ala220Ser,Gln271Glu,Asn326Ser,Ile356Thr,Arg371Ile	Lys541Asn,Phe313Ser
MP1849	2017-10-04	na	na	HS-0364	region31	Cluster28	no	F446I	Lys76Thr	CVIET	Ala220Ser,Gln271Glu,Asn326Ser,Ile356Thr,Arg371Ile	Lys541Asn,Phe313Ser
MP2365	2017-12-13	2017-07-11	after	WM-0367	region35	Cluster28	YES-2017	F446I	Lys76Thr	CVIET	Ala220Ser,Gln271Glu,Asn326Ser,Ile356Thr,Arg371Ile	Lys541Asn,Phe313Ser
MP2388	2017-12-18	2017-07-11	after	WM-0367	region35	Cluster28	no	F446I.wt.mix	Lys76Thr	CVIET	Ala220Ser,Gln271Glu,Asn326Ser,Ile356Thr,Arg371Ile	Lys541Asn,Phe313Ser
MP2551	2017-12-26	2017-06-24	after	MM-0363A	region33	Cluster28	no	F446I	Lys76Thr	CVIET	Ala220Ser,Gln271Glu,Asn326Ser,Ile356Thr,Arg371Ile	Lys541Asn,Phe313Ser
MP2634	2017-12-29	na	na	KL-11013	region35	Cluster28	no	F446I	Lys76Thr	CVIET	Ala220Ser,Gln271Glu,Asn326Ser,Ile356Thr,Arg371Ile	Lys541Asn,Phe313Ser
MP2441	2018-01-05	2017-07-03	after	HG-0369	region35	Cluster28	no	F446I	Lys76Thr	CVIET	Ala220Ser,Gln271Glu,Asn326Ser,Ile356Thr,Arg371Ile	Lys541Asn,Phe313Ser
MP2453	2018-01-06	2017-07-03	after	HG-0369	region35	Cluster28	no	F446I	Lys76Thr	CVIET	Ala220Ser,Gln271Glu,Asn326Ser,Ile356Thr,Arg371Ile	Lys541Asn,Phe313Ser
MP2864	2018-01-24	na	na	KL-11013	region35	Cluster28	no	F446I.wt.mix	Lys76Thr	CVIET	Arg371Ile	Lys541Asn,Phe313Ser
MP3299	2018-05-01	2017-06-24	after	MM-0363A	region33	Cluster28	no	F446I	Lys76Thr	CVIET	Ala220Ser,Gln271Glu,Asn326Ser,Ile356Thr,Arg371Ile	Lys541Asn,Phe313Ser
MP3546	2018-06-14	2017-06-24	after	MM-0363A	region33	Cluster28	no	F446I	Lys76Thr	CVIET	Ala220Ser,Asn326Ser,Ile356Thr,Arg371Ile	Lys541Asn,Phe313Ser
MP4065	2018-06-21	na	na	PL-0379	region34	Cluster28	no	F446I	Lys76Thr	CVIET	Ala220Ser,Gln271Glu,Asn326Ser,Ile356Thr,Arg371Ile	Lys541Asn,Phe313Ser
MP3911	2018-07-02	2017-07-03	after	HG-0369	region35	Cluster28	YES-2018	F446I	Lys76Thr	CVIET	Ala220Ser,Gln271Glu,Asn326Ser,Ile356Thr,Arg371Ile	Phe313Ser
MP3826	2018-07-27	2017-06-24	after	MM-0363A	region33	Cluster28	no	F446I	Lys76Thr	CVIET	Ala220Ser,Gln271Glu,Asn326Ser,Ile356Thr,Arg371Ile	Lys541Asn,Phe313Ser
MP0008	2016-06-15	2015-02-18	after	KT-0219	region27	Cluster29	no	C580Y	Lys76Thr	CVIET	Ala220Ser,Gln271Glu,Asn326Ser,Ile356Thr,Arg371Ile	Phe313Ser,Ser258Leu
METF.HRP.17	2016-06-16	na	na	LF-0284	region32	Cluster29	YES-2016	C580Y	Lys76Thr	CVIET	Ala220Ser,Gln271Glu,Asn326Ser,Ile356Thr,Arg371Ile	Phe313Ser,Ser258Leu
MP0353	2016-11-26	na	na	LT-0133B	region9	Cluster29	no	C580Y	Lys76Thr	CVIET	Ala220Ser,Gln271Glu,Asn326Ser,Ile356Thr,Arg371Ile	Phe313Ser,Ser258Leu
MP1574	2017-05-03	2017-07-04	before	TP-0339	region33	Cluster29	YES-2017	C580Y	Lys76Thr	CVIET	Ala220Ser,Gln271Glu,Asn326Ser,Ile356Thr,Arg371Ile	Phe313Ser,Ser258Leu
MP3400	2017-12-23	na	na	LF-0284	region32	Cluster29	no	C580Y	Lys76Thr	CVIET	Ala220Ser,Gln271Glu,Asn326Ser,Ile356Thr,Arg371Ile	Phe313Ser,Ser258Leu
MP3401	2017-12-23	na	na	LF-0284	region32	Cluster29	no	NA	Lys76Thr	CVIET	Ala220Ser,Asn326Ser,Ile356Thr,Arg371Ile	Phe313Ser,Ser258Leu
MP3396	2018-01-11	na	na	LF-0284	region32	Cluster29	no	C580Y	Lys76Thr	CVIET	Ala220Ser,Gln271Glu,Asn326Ser,Ile356Thr,Arg371Ile	Phe313Ser,Ser258Leu
MP3159	2018-02-26	na	na	BB-0316	region32	Cluster29	no	C580Y	Lys76Thr	CVIET	Ala220Ser,Gln271Glu,Asn326Ser,Ile356Thr,Arg371Ile	Phe313Ser,Ser258Leu
MP3347	2018-04-17	na	na	BB-0316	region32	Cluster29	no	C580Y	Lys76Thr	CVIET	Ala220Ser,Gln271Glu,Asn326Ser,Ile356Thr,Arg371Ile	Phe313Ser,Ser258Leu
MP3264	2018-04-18	na	na	BB-0316	region32	Cluster29	YES-2018	C580Y	Lys76Thr	CVIET	Ala220Ser,Gln271Glu,Asn326Ser,Ile356Thr,Arg371Ile	Phe313Ser,Ser258Leu
MP3274	2018-04-18	na	na	BB-0316	region32	Cluster29	no	C580Y.wt.mix	Lys76Thr	CVIET	Ala220Ser,Gln271Glu,Asn326Ser,Ile356Thr,Arg371Ile	Phe313Ser,Ser258Leu
MP3362	2018-05-04	na	na	BB-0316	region32	Cluster29	no	C580Y	Lys76Thr	CVIET	Ala220Ser,Asn326Ser,Ile356Thr,Arg371Ile	Phe313Ser,Ser258Leu
MP3629	2018-06-05	na	na	BB-0316	region32	Cluster29	no	C580Y	na	na		Phe313Ser
MP0264	2016-02-15	2017-07-12	before	TG-0357	region33	Cluster30	no	WT	Lys76Thr	CVIET	Ala220Ser,Gln271Glu,Asn326Ser,Ile356Thr,Arg371Ile	Lys541Asn,Phe313Ser
MP0345	2016-08-15	na	na	MN-0377	region35	Cluster30	no	WT	Lys76Thr	CVIET	Ala220Ser,Gln271Glu,Asn326Ser,Ile356Thr,Arg371Ile	Lys541Asn,Phe313Ser
MP0472	2016-11-18	na	na	KL-11013	region35	Cluster30	no	WT	Lys76Thr	CVIET	Ala220Ser,Gln271Glu,Asn326Ser,Ile356Thr,Arg371Ile	Lys541Asn,Phe313Ser
MP0473	2016-11-18	na	na	KL-11013	region35	Cluster30	YES-2016	WT	Lys76Thr	CVIET	Ala220Ser,Gln271Glu,Asn326Ser,Ile356Thr,Arg371Ile	Lys541Asn,Phe313Ser
MS0127	2016-11-21	2017-07-04	before	NT-0361	region33	Cluster30	no	WT	Lys76Thr	CVIET	Ala220Ser,Gln271Glu,Asn326Ser,Ile356Thr,Arg371Ile	Lys541Asn,Phe313Ser
MS0131	2016-11-21	2017-07-04	before	NT-0361	region33	Cluster30	no	WT	Lys76Thr	CVIET	Ala220Ser,Gln271Glu,Asn326Ser,Ile356Thr,Arg371Ile	Lys541Asn,Phe313Ser
MS0133	2016-11-21	2017-07-04	before	NT-0361	region33	Cluster30	no	WT	Lys76Thr	CVIET	Ala220Ser,Gln271Glu,Asn326Ser,Ile356Thr,Arg371Ile	Lys541Asn,Phe313Ser
MP0961	2017-03-22	2017-07-11	before	WM-0367	region35	Cluster30	no	WT	Lys76Thr	CVIET	Ala220Ser,Gln271Glu,Asn326Ser,Ile356Thr,Arg371Ile	Lys541Asn,Phe313Ser
MP1187	2017-05-06	2017-06-24	before	MM-0363A	region33	Cluster30	no	WT	Lys76Thr	CVIET	Ala220Ser,Gln271Glu,Asn326Ser,Ile356Thr,Arg371Ile	Lys541Asn,Phe313Ser
MP1328	2017-05-30	2017-06-24	before	MM-0363A	region33	Cluster30	no	WT	Lys76Thr	CVIET	Ala220Ser,Gln271Glu,Asn326Ser,Ile356Thr,Arg371Ile	Lys541Asn,Phe313Ser
MP1345	2017-06-02	2017-07-04	before	NT-0361	region33	Cluster30	YES-2017	WT	Lys76Thr	CVIET	Ala220Ser,Gln271Glu,Asn326Ser,Ile356Thr,Arg371Ile	Lys541Asn,Phe313Ser
MP1329	2017-06-15	2015-08-09	after	PD-0372	region35	Cluster30	no	WT	Lys76Thr	CVIET	Ala220Ser,Gln271Glu,Asn326Ser,Ile356Thr,Arg371Ile	Phe313Ser
MP2119	2017-11-13	na	na	HL-0365A	region28	Cluster30	no	WT	Lys76Thr	CVIET	Ala220Ser,Gln271Glu,Asn326Ser,Ile356Thr,Arg371Ile	Lys541Asn,Phe313Ser
MP2500	2017-12-20	na	na	LK-0331	region33	Cluster31	YES-2017	WT	Lys76Thr	CVIET	Ala220Ser,Gln271Glu,Asn326Ser,Ile356Thr,Arg371Ile	Ser258Leu
MP2660	2018-01-19	na	na	MM-11004	region30	Cluster31	no	WT	Lys76Thr	CVIET	Ala220Ser,Gln271Glu,Asn326Ser,Ile356Thr,Arg371Ile	Ser258Leu
MP3210	2018-04-09	na	na	ML-0363B	region30	Cluster31	no	WT	Lys76Thr	CVIET	Ala220Ser,Gln271Glu,Asn326Ser,Ile356Thr,Arg371Ile	Ser258Leu
MP3506	2018-05-21	2017-06-30	after	MK-363E	region30	Cluster31	no	WT	Lys76Thr	CVIET	Ala220Ser,Gln271Glu,Asn326Ser,Ile356Thr,Arg371Ile	na
MP3493	2018-05-30	na	na	LK-0331	region33	Cluster31	no	WT	Lys76Thr	CVIET	Ala220Ser,Gln271Glu,Asn326Ser,Ile356Thr,Arg371Ile	Ser258Leu
MP3668	2018-05-31	na	na	LE-0475	region37	Cluster31	YES-2018	WT	Lys76Thr	CVIET	Ala220Ser,Gln271Glu,Asn326Ser,Ile356Thr,Arg371Ile	Ser258Leu
MP3650	2018-06-11	na	na	LK-0462A	region37	Cluster31	no	WT	Lys76Thr	CVIET	Ala220Ser,Gln271Glu,Asn326Ser,Ile356Thr,Arg371Ile	Ser258Leu
MP3737	2018-06-12	na	na	ML-0363B	region30	Cluster31	no	WT	Lys76Thr	CVIET	Ala220Ser,Gln271Glu,Asn326Ser,Ile356Thr,Arg371Ile	Ser258Leu
MP3713	2018-06-13	na	na	ML-0363B	region30	Cluster31	no	NA	Lys76Thr	CVIET	Ala220Ser,Gln271Glu,Asn326Ser,Ile356Thr	Ser258Leu
MP3825	2018-07-23	na	na	LK-0331	region33	Cluster31	no	NA	Lys76Thr	CVIET	Ala220Ser,Gln271Glu,Asn326Ser,Arg371Ile	Ser258Leu
MP4475	2019-04-01	2017-06-30	after	MK-363C	region30	Cluster31	no	WT	Lys76Thr	CVIET	Ala220Ser,Gln271Glu,Asn326Ser,Ile356Thr,Arg371Ile	Ser258Leu
MP4533	2019-05-11	na	na	MK-11003	region25	Cluster31	YES-2019	WT	Lys76Thr	CVIET	Ala220Ser,Gln271Glu,Asn326Ser,Ile356Thr,Arg371Ile	Ser258Leu
MP3355	2018-04-20	na	na	TK-0080A	region6	Cluster32	no	NA	Lys76Thr	CVIET	Ala220Ser,Gln271Glu,Asn326Ser,Ile356Thr,Arg371Ile	Ser258Leu
MP3500	2018-05-28	na	na	TK-0080A	region6	Cluster32	YES-2018	WT	Lys76Thr	CVIET	Ala220Ser,Gln271Glu,Asn326Ser,Ile356Thr,Arg371Ile	Ser258Leu
MP4247	2018-11-24	na	na	TM-0083A	region6	Cluster32	no	WT	na	na	Asn326Ser,Ile356Thr,Arg371Ile	Ser258Leu
MP4248	2018-12-18	na	na	KP-0344A	region28	Cluster32	no	WT	na	na	Gln271Glu,Asn326Ser,Ile356Thr,Arg371Ile	Ser258Leu
MP4670	2019-06-25	2015-02-10	after	HP-0203	region18	Cluster32	no	WT	Lys76Thr	CVIET	Ala220Ser,Gln271Glu,Asn326Ser,Ile356Thr,Arg371Ile	Ser258Leu
MP4735	2019-08-29	na	na	KB-11025	region3	Cluster32	no	WT	Lys76Thr	CVIET	Ala220Ser,Gln271Glu,Asn326Ser,Ile356Thr,Arg371Ile	Ser258Leu
MP4780	2019-10-14	na	na	KK-0037	region3	Cluster32	YES-2019	WT	Lys76Thr	CVIET	Ala220Ser,Gln271Glu,Asn326Ser,Ile356Thr,Arg371Ile	Ser258Leu
MP4758	2019-10-16	na	na	KK-0037	region3	Cluster32	no	WT	Lys76Thr	CVIET	Ala220Ser,Gln271Glu,Asn326Ser,Ile356Thr,Arg371Ile	Ser258Leu
MP4787	2019-11-18	na	na	ML-11806	na	Cluster32	no	WT	Lys76Thr	CVIET	Ala220Ser,Gln271Glu,Asn326Ser,Ile356Thr,Arg371Ile	Ser258Leu
MP4838	2020-05-28	na	na	ML-11806	na	Cluster32	no	WT	Lys76Thr	CVIET	Ala220Ser,Gln271Glu,Asn326Ser,Ile356Thr,Arg371Ile	Ser258Leu
MP4984	2020-07-06	na	na	TD-0021	region3	Cluster32	YES-2020	WT	Lys76Thr	CVIET	Ala220Ser,Gln271Glu,Asn326Ser,Ile356Thr,Arg371Ile	Ser258Leu
MP4993	2020-07-10	na	na	KK-0037	region3	Cluster32	no	WT	Lys76Thr	CVIET	Ala220Ser,Gln271Glu,Asn326Ser,Ile356Thr,Arg371Ile	Ser258Leu
MP2107	2017-11-02	na	na	HB-0340A	region28	Cluster33	no	G449A	Lys76Thr	CVIET	Ala220Ser,Gln271Glu,Asn326Ser,Ile356Thr,Arg371Ile	Lys541Asn,Phe313Ser
MP2334	2017-12-03	na	na	HB-0340A	region28	Cluster33	YES-2017	G449A	Lys76Thr	CVIET	Ala220Ser,Gln271Glu,Asn326Ser,Ile356Thr,Arg371Ile	Lys541Asn,Phe313Ser
MP2964	2018-01-24	na	na	KP-0344A	region28	Cluster33	no	G449A	Lys76Thr	CVIET	Ala220Ser,Gln271Glu,Asn326Ser,Ile356Thr,Arg371Ile	Lys541Asn,Phe313Ser
MP2887	2018-02-14	na	na	KP-0344B	region28	Cluster33	YES-2018	G449A	Lys76Thr	CVIET	Ala220Ser,Gln271Glu,Asn326Ser,Ile356Thr,Arg371Ile	Lys541Asn,Phe313Ser
MP4383	2018-12-03	na	na	KP-0344B	region28	Cluster33	no	G449A	Lys76Thr	CVIET	Ala220Ser,Gln271Glu,Ile356Thr,Arg371Ile	Lys541Asn,Phe313Ser
MP4279	2018-12-07	2015-09-12	after	HT-0323	region30	Cluster33	no	G449A	Lys76Thr	CVIET	Ala220Ser,Gln271Glu,Asn326Ser,Ile356Thr,Arg371Ile	Lys541Asn,Phe313Ser
MP4349	2018-12-08	2015-09-12	after	HT-0323	region30	Cluster33	no	G449A	Lys76Thr	CVIET	Ala220Ser,Gln271Glu,Asn326Ser,Ile356Thr,Arg371Ile	Lys541Asn,Phe313Ser
MP4286	2019-01-02	na	na	KP-0344B	region28	Cluster33	no	G449A	Lys76Thr	CVIET	Ala220Ser,Gln271Glu,Asn326Ser,Ile356Thr,Arg371Ile	Lys541Asn,Phe313Ser
MP4255	2019-01-07	2015-09-12	after	HT-0323	region30	Cluster33	no	G449A	Lys76Thr	CVIET	Ala220Ser,Gln271Glu,Asn326Ser,Ile356Thr,Arg371Ile	Lys541Asn,Phe313Ser
MP4464	2019-02-11	na	na	KP-0344B	region28	Cluster33	no	G449A	Lys76Thr	CVIET	Ala220Ser,Gln271Glu,Asn326Ser,Ile356Thr,Arg371Ile	Lys541Asn,Phe313Ser
MP4461	2019-02-13	2015-09-12	after	HT-0323	region30	Cluster33	no	G449A	Lys76Thr	CVIET	Ala220Ser,Gln271Glu,Asn326Ser,Ile356Thr,Arg371Ile	Lys541Asn,Phe313Ser
MP4449	2019-02-18	2015-09-12	after	HT-0323	region30	Cluster33	YES-2019	G449A	Lys76Thr	CVIET	Ala220Ser,Gln271Glu,Asn326Ser,Ile356Thr,Arg371Ile	Lys541Asn,Phe313Ser
MP2731	2017-12-30	2017-07-12	after	HD-0363D	region30	Cluster34	YES-2017	E252Q	Lys76Thr	CVIET	Ala220Ser,Gln271Glu,Asn326Ser,Ile356Thr,Arg371Ile	Phe313Ser,Ser258Leu
MP2739	2018-02-28	2017-07-12	after	HD-0363D	region30	Cluster34	no	E252Q	Lys76Thr	CVIET	Ala220Ser,Gln271Glu,Asn326Ser,Ile356Thr,Arg371Ile	Phe313Ser,Ser258Leu
MP3839	2018-08-17	na	na	KL-11013	region35	Cluster34	no	E252Q	Lys76Thr	CVIET	Ala220Ser,Gln271Glu,Asn326Ser,Ile356Thr,Arg371Ile	Phe313Ser,Ser258Leu
MP3811	2018-08-19	na	na	KL-11013	region35	Cluster34	no	E252Q	Lys76Thr	CVIET	Ala220Ser,Gln271Glu,Asn326Ser,Ile356Thr,Arg371Ile	Phe313Ser,Ser258Leu
MP4159	2018-11-13	2017-07-04	after	LK-0350	region33	Cluster34	no	E252Q	Lys76Thr	CVIET	Ala220Ser,Gln271Glu,Asn326Ser,Ile356Thr,Arg371Ile	Phe313Ser,Ser258Leu
MP4396	2018-11-29	na	na	HS-0364	region31	Cluster34	no	E252Q	Lys76Thr	CVIET	Ala220Ser,Gln271Glu,Asn326Ser,Ile356Thr,Arg371Ile	Phe313Ser,Ser258Leu
MP4419	2018-12-13	2017-06-30	after	MK-363C	region30	Cluster34	no	E252Q	Lys76Thr	CVIET	Ala220Ser,Gln271Glu,Asn326Ser,Ile356Thr,Arg371Ile	Phe313Ser,Ser258Leu
MP4259	2018-12-15	2017-07-04	after	TM-0363F	region30	Cluster34	no	E252Q	Lys76Thr	CVIET	Ala220Ser,Gln271Glu,Asn326Ser,Ile356Thr,Arg371Ile	Phe313Ser,Ser258Leu
MP4318	2018-12-18	2017-07-04	after	LK-0350	region33	Cluster34	no	E252Q	Lys76Thr	CVIET	Ala220Ser,Gln271Glu,Asn326Ser,Ile356Thr,Arg371Ile	Phe313Ser,Ser258Leu
MP4326	2018-12-18	2017-07-04	after	LK-0350	region33	Cluster34	no	E252Q	Lys76Thr	CVIET	Ala220Ser,Gln271Glu,Asn326Ser,Ile356Thr,Arg371Ile	Phe313Ser,Ser258Leu
MP4399	2018-12-24	na	na	DL-262A	region25	Cluster34	no	E252Q	Lys76Thr	CVIET	Ala220Ser,Gln271Glu,Asn326Ser,Ile356Thr,Arg371Ile	Phe313Ser,Ser258Leu
MP4352	2018-12-27	2017-06-30	after	MK-363C	region30	Cluster34	YES-2018	E252Q	Lys76Thr	CVIET	Ala220Ser,Gln271Glu,Asn326Ser,Ile356Thr,Arg371Ile	Phe313Ser,Ser258Leu
MP1666	2017-07-14	na	na	PH-0356A	region31	Cluster35	no	F446I	Lys76Thr	CVIET	Ala220Ser,Gln271Glu,Asn326Ser,Ile356Thr,Arg371Ile	Lys541Asn,Phe313Ser
MP2061	2017-10-23	na	na	MN-268C	region25	Cluster35	YES-2017	F446I	Lys76Thr	CVIET	Ala220Ser,Gln271Glu,Asn326Ser,Ile356Thr,Arg371Ile	Lys541Asn,Phe313Ser
MP2488	2017-12-25	na	na	MN-268C	region25	Cluster35	no	F446I	Lys76Thr	CVIET	Ala220Ser,Gln271Glu,Asn326Ser,Ile356Thr,Arg371Ile	Lys541Asn,Phe313Ser
MP2661	2018-01-02	na	na	KL-0268A	region25	Cluster35	no	F446I	Lys76Thr	CVIET	Ala220Ser,Gln271Glu,Asn326Ser,Ile356Thr,Arg371Ile	Lys541Asn,Phe313Ser
MP2970	2018-01-23	na	na	MN-268C	region25	Cluster35	no	F446I	Lys76Thr	CVIET	Ala220Ser,Gln271Glu,Asn326Ser,Ile356Thr,Arg371Ile	Lys541Asn,Phe313Ser
MP3473	2018-05-28	2017-07-12	after	HD-0363D	region30	Cluster35	no	F446I	Lys76Thr	CVIET	Ala220Ser,Gln271Glu,Asn326Ser,Ile356Thr,Arg371Ile	Lys541Asn,Phe313Ser
MP3606	2018-05-30	2017-07-12	after	HD-0363D	region30	Cluster35	no	F446I	Lys76Thr	CVIET	Ala220Ser,Gln271Glu,Asn326Ser,Ile356Thr,Arg371Ile	Lys541Asn,Phe313Ser
MP3526	2018-06-01	2017-07-12	after	HD-0363D	region30	Cluster35	YES-2018	F446I	Lys76Thr	CVIET	Ala220Ser,Gln271Glu,Asn326Ser,Ile356Thr,Arg371Ile	Lys541Asn,Phe313Ser
MP3990	2018-06-25	na	na	BT-0353B	region28	Cluster35	no	NA	Lys76Thr	CVIET	Ala220Ser,Gln271Glu,Arg371Ile	Lys541Asn
MP4444	2019-02-04	na	na	NN-0291A	region17	Cluster35	no	F446I	na	na	Ile356Thr	Lys541Asn,Phe313Ser
MP4476	2019-04-15	na	na	TM-298C	region23	Cluster35	YES-2019	F446I	na	na		Lys541Asn,Phe313Ser
MP2175	2017-12-07	na	na	LK-0331	region33	Cluster36	YES-2017	WT	Lys76Thr	CVIET	Ala220Ser,Gln271Glu,Asn326Ser,Ile356Thr,Arg371Ile	Ser258Leu
MP2476	2017-12-19	na	na	LK-0331	region33	Cluster36	no	WT	Lys76Thr	CVIET	Ala220Ser,Gln271Glu,Asn326Ser,Ile356Thr,Arg371Ile	Ser258Leu
MP2512	2017-12-20	na	na	LK-0331	region33	Cluster36	no	G718S	Lys76Thr	CVIET	Ala220Ser,Gln271Glu,Asn326Ser,Ile356Thr,Arg371Ile	Ser258Leu
MP2542	2017-12-25	na	na	LK-0331	region33	Cluster36	no	WT	Lys76Thr	CVIET	Ala220Ser,Gln271Glu,Asn326Ser,Ile356Thr,Arg371Ile	Ser258Leu
MP4066	2018-06-21	2017-06-24	after	MM-0363A	region33	Cluster36	no	WT	Lys76Thr	CVIET	Ala220Ser,Gln271Glu,Asn326Ser,Ile356Thr,Arg371Ile	Ser258Leu
MP3885	2018-06-22	na	na	MK-11003	region25	Cluster36	no	WT	Lys76Thr	CVIET	Ala220Ser,Gln271Glu,Asn326Ser,Ile356Thr,Arg371Ile	Ser258Leu
MP4035	2018-07-05	2017-07-04	after	TP-0339	region33	Cluster36	YES-2018	WT	Lys76Thr	CVIET	Ala220Ser,Gln271Glu,Asn326Ser,Ile356Thr,Arg371Ile	Ser258Leu
MP4033	2018-07-06	2017-07-04	after	TP-0339	region33	Cluster36	no	WT	Lys76Thr	CVIET	Ala220Ser,Gln271Glu,Asn326Ser,Ile356Thr,Arg371Ile	Ser258Leu
MP4028	2018-07-11	2017-07-04	after	TP-0339	region33	Cluster36	no	WT	Lys76Thr	CVIET	Ala220Ser,Gln271Glu,Asn326Ser,Ile356Thr,Arg371Ile	Ser258Leu
MP4254	2018-11-29	na	na	HS-0364	region31	Cluster36	no	WT	Lys76Thr	CVIET	Ala220Ser,Gln271Glu,Asn326Ser,Ile356Thr,Arg371Ile	Ser258Leu
MP4441	2019-02-15	na	na	LK-0331	region33	Cluster36	YES-2019	WT	Lys76Thr	CVIET	Ala220Ser,Gln271Glu,Asn326Ser,Ile356Thr,Arg371Ile	Ser258Leu
MP2288	2017-12-07	na	na	LK-0331	region33	Cluster37	no	F446I	Lys76Thr	CVIET	Ala220Ser,Gln271Glu,Asn326Ser,Ile356Thr,Arg371Ile	Lys541Asn,Phe313Ser
MP2193	2017-12-13	na	na	LK-0331	region33	Cluster37	YES-2017	F446I	Lys76Thr	CVIET	Ala220Ser,Gln271Glu,Asn326Ser,Ile356Thr,Arg371Ile	Lys541Asn,Phe313Ser
MP2543	2017-12-27	na	na	LK-0331	region33	Cluster37	no	WT	Lys76Thr	CVIET	Gln271Glu,Asn326Ser,Ile356Thr,Arg371Ile	Lys541Asn,Phe313Ser
MP2878	2018-01-27	2017-07-11	after	WM-0367	region35	Cluster37	no	F446I	Lys76Thr	CVIET	Ala220Ser,Gln271Glu,Asn326Ser,Ile356Thr,Arg371Ile	Lys541Asn,Phe313Ser
MP2915	2018-01-27	2017-07-11	after	WM-0367	region35	Cluster37	no	F446I	Lys76Thr	CVIET	Ala220Ser,Gln271Glu,Asn326Ser,Ile356Thr,Arg371Ile	Phe313Ser
MP3450	2018-05-22	na	na	PS-11064A	region30	Cluster37	no	F446I	Lys76Thr	CVIET	Ala220Ser,Gln271Glu,Asn326Ser,Ile356Thr,Arg371Ile	Lys541Asn,Phe313Ser
MP3495	2018-06-02	na	na	LK-0331	region33	Cluster37	no	F446I	Lys76Thr	CVIET	Ala220Ser,Gln271Glu,Asn326Ser,Ile356Thr,Arg371Ile	Lys541Asn,Phe313Ser
MP4397	2018-11-28	2015-02-13	after	MT-0305	region22	Cluster37	YES-2018	F446I	Lys76Thr	CVIET	Ala220Ser,Gln271Glu,Asn326Ser,Ile356Thr,Arg371Ile	Lys541Asn,Phe313Ser
MP4341	2018-12-29	na	na	LK-0331	region33	Cluster37	no	F446I	Lys76Thr	CVIET	Ala220Ser,Gln271Glu,Asn326Ser,Ile356Thr,Arg371Ile	Lys541Asn,Phe313Ser
MP4473	2019-02-04	na	na	LK-0331	region33	Cluster37	YES-2019	F446I	Lys76Thr	CVIET	Ala220Ser,Gln271Glu,Asn326Ser,Ile356Thr,Arg371Ile	Lys541Asn,Phe313Ser
MP4483	2019-04-20	na	na	KL-11013	region35	Cluster37	no	F446I	Lys76Thr	CVIET	Ala220Ser,Gln271Glu,Asn326Ser,Ile356Thr,Arg371Ile	Lys541Asn,Phe313Ser
MP0193	2016-06-28	na	na	MT-0342A	region21	Cluster38	YES-2016	WT	Lys76Thr	CVIET	Ala220Ser,Gln271Glu,Asn326Ser,Ile356Thr,Arg371Ile	Gly308Glu,Ser258Leu
MP0277	2016-07-25	2016-09-11	before	MW-0386A	region26	Cluster38	no	WT	Lys76Thr	CVIET	Ala220Ser,Gln271Glu,Asn326Ser,Ile356Thr,Arg371Ile	Gly308Glu,Ser258Leu
MP0781	2017-01-12	na	na	LK-0319A	region21	Cluster38	no	WT	Lys76Thr	CVIET	Ala220Ser,Gln271Glu,Asn326Ser,Ile356Thr,Arg371Ile	Gly308Glu,Ser258Leu
MP0789	2017-02-08	na	na	MK-11047	region17	Cluster38	YES-2017	WT	Lys76Thr	CVIET	Ala220Ser,Gln271Glu,Asn326Ser,Ile356Thr,Arg371Ile	Gly308Glu,Ser258Leu
MP0696	2017-02-14	na	na	MT-0342A	region21	Cluster38	no	WT	Lys76Thr	CVIET	Ala220Ser,Asn326Ser,Ile356Thr,Arg371Ile	Gly308Glu,Ser258Leu
MP0974	2017-03-08	na	na	HB-0320A	region21	Cluster38	no	WT	Lys76Thr	CVIET	Ala220Ser,Gln271Glu,Asn326Ser,Ile356Thr,Arg371Ile	Gly308Glu,Ser258Leu
MP0963	2017-03-12	na	na	HB-0320A	region21	Cluster38	no	WT	Lys76Thr	CVIET	Ala220Ser,Gln271Glu,Asn326Ser,Ile356Thr,Arg371Ile	Gly308Glu,Ser258Leu
METF.HRP.11	2017-03-23	na	na	HR-0318A	region21	Cluster38	no	WT	Lys76Thr	CVIET	Ala220Ser,Gln271Glu,Asn326Ser,Ile356Thr,Arg371Ile	Gly308Glu,Ser258Leu
MP1361	2017-06-12	na	na	HB-0320A	region21	Cluster38	no	NA	Lys76Thr	CVIET	Ala220Ser,Gln271Glu,Asn326Ser,Ile356Thr,Arg371Ile	Gly308Glu,Ser258Leu
MP1807	2017-09-05	na	na	HB-0320A	region21	Cluster38	no	WT	Lys76Thr	CVIET	Gln271Glu,Asn326Ser,Ile356Thr,Arg371Ile	Gly308Glu,Ser258Leu
MP0800	2017-02-16	na	na	TM-0308	region14	Cluster39	YES-2017	C580Y	Lys76Thr	CVIET	Ala220Ser,Gln271Glu,Asn326Ser,Ile356Thr,Arg371Ile	Ser258Leu
MP0952	2017-03-06	na	na	TM-0308	region14	Cluster39	no	C580Y	Lys76Thr	CVIET	Ala220Ser,Gln271Glu,Asn326Ser,Ile356Thr,Arg371Ile	Ser258Leu
MP0921	2017-03-20	na	na	TM-0308	region14	Cluster39	no	C580Y	Lys76Thr	CVIET	Ala220Ser,Gln271Glu,Asn326Ser,Ile356Thr,Arg371Ile	Ser258Leu
MP0936	2017-03-20	na	na	TM-0308	region14	Cluster39	no	C580Y	Lys76Thr	CVIET	Ala220Ser,Gln271Glu,Asn326Ser,Ile356Thr,Arg371Ile	Ser258Leu
MP0980	2017-04-22	na	na	NK_11800A	region11	Cluster39	no	C580Y	Lys76Thr	CVIET	Ala220Ser,Gln271Glu,Asn326Ser,Ile356Thr,Arg371Ile	Ser258Leu
MP1150	2017-05-15	na	na	TM-0308	region14	Cluster39	no	NA	Lys76Thr	CVIET	Ala220Ser,Gln271Glu,Ile356Thr,Arg371Ile	Ser258Leu
MP1184	2017-05-25	na	na	TM-0308	region14	Cluster39	no	C580Y	Lys76Thr	CVIET	Ala220Ser,Gln271Glu,Asn326Ser,Ile356Thr,Arg371Ile	Ser258Leu
MP1456	2017-05-30	na	na	CK-11052A	region14	Cluster39	no	C580Y	Lys76Thr	CVIET	Ala220Ser,Gln271Glu,Asn326Ser,Ile356Thr,Arg371Ile	Ser258Leu
MP1445	2017-06-12	na	na	TM-0308	region14	Cluster39	no	C580Y	Lys76Thr	CVIET	Ala220Ser,Gln271Glu,Asn326Ser,Ile356Thr,Arg371Ile	Ser258Leu
MP4794	2019-12-20	na	na	TM-0308	region14	Cluster39	YES-2019	C580Y	Lys76Thr	CVIET	Ala220Ser,Gln271Glu,Asn326Ser,Ile356Thr,Arg371Ile	Ser258Leu
MP0031	2016-02-05	na	na	KL-0268B	region25	Cluster40	no	F446I	Lys76Thr	CVIET	Ala220Ser,Gln271Glu,Asn326Ser,Ile356Thr,Arg371Ile	Lys541Asn,Phe313Ser
MP0037	2016-02-05	na	na	KL-0268B	region25	Cluster40	no	F446I	Lys76Thr	CVIET	Ala220Ser,Gln271Glu,Asn326Ser,Ile356Thr,Arg371Ile	Lys541Asn,Phe313Ser
MP0085	2016-02-07	na	na	HB-11007	region25	Cluster40	no	F446I	Lys76Thr	CVIET	Ala220Ser,Gln271Glu,Asn326Ser,Ile356Thr,Arg371Ile	Lys541Asn,Phe313Ser
MP0150	2016-02-07	na	na	HB-11007	region25	Cluster40	YES-2016	F446I	Lys76Thr	CVIET	Ala220Ser,Gln271Glu,Asn326Ser,Ile356Thr,Arg371Ile	Lys541Asn,Phe313Ser
MP0042	2016-04-05	na	na	HB-0269A	region25	Cluster40	no	F446I	Lys76Thr	CVIET	Ala220Ser,Gln271Glu,Asn326Ser,Ile356Thr,Arg371Ile	Lys541Asn,Phe313Ser
MP0034	2016-04-23	na	na	CK-298B	region15	Cluster40	no	F446I	Lys76Thr	CVIET	Ala220Ser,Gln271Glu,Asn326Ser,Ile356Thr,Arg371Ile	Lys541Asn,Phe313Ser
MP0028	2016-06-13	na	na	KL-0268B	region25	Cluster40	no	F446I	Lys76Thr	CVIET	Ala220Ser,Gln271Glu,Asn326Ser,Ile356Thr,Arg371Ile	Lys541Asn,Phe313Ser
MP0313	2016-08-02	na	na	HB-11007	region25	Cluster40	no	F446I	Lys76Thr	CVIET		Lys541Asn,Phe313Ser
MP0320	2016-08-10	na	na	PB-0275	region15	Cluster40	no	F446I.wt.mix	Lys76Thr	CVIET	Ala220Ser,Gln271Glu,Asn326Ser,Ile356Thr,Arg371Ile	Lys541Asn,Phe313Ser
MP0013	2016-12-06	na	na	KL-0268B	region25	Cluster40	no	F446I	Lys76Thr	CVIET	Ala220Ser,Gln271Glu,Asn326Ser,Ile356Thr,Arg371Ile	Lys541Asn,Phe313Ser
MP0140	2016-06-20	na	na	DB-0145B	region10	Cluster41	no	F446I	Lys76Thr	CVIET	Ala220Ser,Gln271Glu,Asn326Ser,Ile356Thr,Arg371Ile	Lys541Asn,Phe313Ser
MP0450	2016-10-29	na	na	TG-0294	region32	Cluster41	YES-2016	F446I	Lys76Thr	CVIET	Ala220Ser,Gln271Glu,Ile356Thr,Arg371Ile	Lys541Asn,Phe313Ser
MP1382	2017-06-06	na	na	MM-0181	region32	Cluster41	no	F446I	Lys76Thr	CVIET	Ala220Ser,Gln271Glu,Ile356Thr,Arg371Ile	Lys541Asn,Phe313Ser
MP2203	2017-12-02	na	na	MM-0181	region32	Cluster41	no	F446I	Lys76Thr	CVIET	Ala220Ser,Gln271Glu,Asn326Ser,Ile356Thr,Arg371Ile	Lys541Asn,Phe313Ser
MP2185	2017-12-06	na	na	LF-0284	region32	Cluster41	YES-2017	F446I	Lys76Thr	CVIET	Ala220Ser,Gln271Glu,Asn326Ser,Ile356Thr,Arg371Ile	Lys541Asn,Phe313Ser
MP2217	2017-12-06	na	na	LF-0284	region32	Cluster41	no	F446I	Lys76Thr	CVIET	Ala220Ser,Gln271Glu,Asn326Ser,Ile356Thr,Arg371Ile	Lys541Asn,Phe313Ser
MP3376	2018-01-28	na	na	MM-0181	region32	Cluster41	no	F446I	Lys76Thr	CVIET	Ala220Ser,Gln271Glu,Asn326Ser,Ile356Thr,Arg371Ile	Lys541Asn,Phe313Ser
MP3983	2018-06-18	2015-02-13	after	MT-0305	region22	Cluster41	YES-2018	F446I	Lys76Thr	CVIET	Ala220Ser,Gln271Glu,Asn326Ser,Ile356Thr,Arg371Ile	Lys541Asn,Phe313Ser
MP4189	2018-10-22	na	na	MM-0181	region32	Cluster41	no	F446I	Lys76Thr	CVIET	Ala220Ser,Gln271Glu,Asn326Ser,Ile356Thr,Arg371Ile	Lys541Asn,Phe313Ser
MP0410	2016-10-03	2017-07-04	before	NT-0361	region33	Cluster42	no	R561H	Lys76Thr	CVIET	Ala220Ser,Gln271Glu,Asn326Ser,Ile356Thr,Arg371Ile	Phe313Ser,Ser258Leu
METF.HRP.51	2016-11-21	na	na	NT-0361	region33	Cluster42	YES-2016	R561H	Lys76Thr	CVIET	Ala220Ser,Gln271Glu,Asn326Ser,Ile356Thr,Arg371Ile	Phe313Ser,Ser258Leu
MS0126	2016-11-21	2017-07-04	before	NT-0361	region33	Cluster42	no	R561H	Lys76Thr	CVIET	Ala220Ser,Gln271Glu,Asn326Ser,Ile356Thr,Arg371Ile	Phe313Ser,Ser258Leu
MP1011	2017-02-04	2017-07-03	before	HG-0369	region35	Cluster42	no	R561H.wt.mix	Lys76Thr	CVIET	Ile356Thr,Arg371Ile	Phe313Ser,Ser258Leu
MP0986	2017-04-24	na	na	KL-11013	region35	Cluster42	no	R561H	Lys76Thr	CVIET	Ala220Ser,Gln271Glu,Asn326Ser,Ile356Thr,Arg371Ile	Phe313Ser,Ser258Leu
MP1424	2017-05-30	2017-07-12	before	TG-0357	region33	Cluster42	no	R561H	Lys76Thr	CVIET	Ala220Ser,Gln271Glu,Asn326Ser,Ile356Thr,Arg371Ile	Phe313Ser,Ser258Leu
MP1052	2017-07-27	2017-06-30	after	MK-363C	region30	Cluster42	no	R561H	Lys76Thr	CVIET	Ala220Ser,Gln271Glu,Asn326Ser,Ile356Thr,Arg371Ile	Phe313Ser,Ser258Leu
MP1621	2017-07-27	2017-06-30	after	MK-363C	region30	Cluster42	YES-2017	R561H	Lys76Thr	CVIET	Ala220Ser,Gln271Glu,Asn326Ser,Ile356Thr,Arg371Ile	Phe313Ser,Ser258Leu
MP4628	2019-06-03	2017-07-04	after	TP-0339	region33	Cluster43	no	WT	Lys76Thr	CVIET	Ala220Ser,Gln271Glu,Asn326Ser,Ile356Thr,Arg371Ile	Gly308Glu,Ser258Leu
MP4625	2019-06-10	2017-06-24	after	MM-0363A	region33	Cluster43	YES-2019	WT	Lys76Thr	CVIET	Ala220Ser,Gln271Glu,Asn326Ser,Ile356Thr,Arg371Ile	Gly308Glu,Ser258Leu
MP4629	2019-06-10	2017-07-04	after	TP-0339	region33	Cluster43	no	WT	Lys76Thr	CVIET	Ala220Ser,Gln271Glu,Asn326Ser,Ile356Thr,Arg371Ile	Gly308Glu,Ser258Leu
MP4630	2019-06-14	2017-07-04	after	TP-0339	region33	Cluster43	no	WT	Lys76Thr	CVIET	Ala220Ser,Gln271Glu,Asn326Ser,Ile356Thr,Arg371Ile	Gly308Glu,Ser258Leu
MP4554	2019-06-18	2017-07-04	after	LK-0350	region33	Cluster43	no	WT	Lys76Thr	CVIET	Asn326Ser,Ile356Thr,Arg371Ile	Gly308Glu,Ser258Leu
MP4626	2019-06-21	2017-07-04	after	TP-0339	region33	Cluster43	no	WT	Lys76Thr	CVIET	Ala220Ser,Gln271Glu,Asn326Ser,Ile356Thr,Arg371Ile	Gly308Glu,Ser258Leu
MP4666	2019-06-21	2017-07-04	after	TP-0339	region33	Cluster43	no	WT	Lys76Thr	CVIET	Ala220Ser,Gln271Glu,Asn326Ser,Ile356Thr,Arg371Ile	Gly308Glu,Ser258Leu
MP4681	2019-06-25	2017-07-04	after	TP-0339	region33	Cluster43	no	WT	Lys76Thr	CVIET	Ala220Ser,Gln271Glu,Asn326Ser,Ile356Thr,Arg371Ile	Gly308Glu,Ser258Leu
MP2749	2018-01-15	2016-03-13	after	PH-0336A	region19	Cluster44	no	G449A	Lys76Thr	CVIET	Ala220Ser,Gln271Glu,Asn326Ser,Ile356Thr,Arg371Ile	Lys541Asn,Phe313Ser
MP2740	2018-01-18	2016-03-13	after	PH-0336A	region19	Cluster44	no	G449A	Lys76Thr	CVIET	Ala220Ser,Gln271Glu,Asn326Ser,Ile356Thr,Arg371Ile	Lys541Asn,Phe313Ser
MP2784	2018-01-22	na	na	PP-0338A	region19	Cluster44	no	G449A	Lys76Thr	CVIET	Ala220Ser,Gln271Glu,Asn326Ser,Ile356Thr,Arg371Ile	Lys541Asn,Phe313Ser
MP2909	2018-01-25	2016-03-13	after	PH-0336A	region19	Cluster44	no	G449A	Lys76Thr	CVIET	Ala220Ser,Gln271Glu,Asn326Ser,Ile356Thr,Arg371Ile	Lys541Asn,Phe313Ser
MP2933	2018-01-27	na	na	PP-0338A	region19	Cluster44	no	G449A.wt.mix	Lys76Thr	CVIET	Ala220Ser,Gln271Glu,Asn326Ser,Ile356Thr,Arg371Ile	Lys541Asn,Phe313Ser
MP2826	2018-01-29	2016-03-13	after	PH-0336A	region19	Cluster44	no	G449A	Lys76Thr	CVIET	Ala220Ser,Gln271Glu,Asn326Ser,Ile356Thr,Arg371Ile	Lys541Asn,Phe313Ser
MP2837	2018-01-29	2016-03-13	after	PH-0336A	region19	Cluster44	no	G449A	Lys76Thr	CVIET	Ala220Ser,Gln271Glu,Asn326Ser,Ile356Thr,Arg371Ile	Lys541Asn,Phe313Ser
MP2845	2018-01-29	2016-03-13	after	PH-0336A	region19	Cluster44	YES-2018	G449A	Lys76Thr	CVIET	Ala220Ser,Gln271Glu,Asn326Ser,Ile356Thr,Arg371Ile	Lys541Asn,Phe313Ser
MP1137	2017-05-01	na	na	MK-11003	region25	Cluster45	no	M476I.wt.mix	Lys76Thr	CVIET	Ala220Ser,Gln271Glu,Asn326Ser,Ile356Thr,Arg371Ile	Phe313Ser,Ser258Leu
MP1162	2017-05-15	na	na	KL-0268E	region25	Cluster45	YES-2017	M476I	Lys76Thr	CVIET	Ala220Ser,Gln271Glu,Asn326Ser,Ile356Thr,Arg371Ile	Phe313Ser,Ser258Leu
MP1385	2017-05-29	na	na	MK-11003	region25	Cluster45	no	M476I	Lys76Thr	CVIET	Ala220Ser,Gln271Glu,Asn326Ser,Ile356Thr,Arg371Ile	Phe313Ser,Ser258Leu
MP1357	2017-05-30	na	na	MK-11003	region25	Cluster45	no	M476I	Lys76Thr	CVIET	Ala220Ser,Gln271Glu,Asn326Ser,Ile356Thr,Arg371Ile	Phe313Ser,Ser258Leu
MP1325	2017-06-03	na	na	HB-11007	region25	Cluster45	no	M476I	Lys76Thr	CVIET	Ala220Ser,Gln271Glu,Asn326Ser,Ile356Thr,Arg371Ile	Phe313Ser,Ser258Leu
MP1376	2017-06-08	na	na	HB-0269A	region25	Cluster45	no	M476I	Lys76Thr	CVIET	Ala220Ser,Gln271Glu,Asn326Ser,Ile356Thr,Arg371Ile	Phe313Ser,Ser258Leu
MP1653	2017-06-27	na	na	MK-11003	region25	Cluster45	no	M476I	Lys76Thr	CVIET	Ala220Ser,Gln271Glu,Asn326Ser,Ile356Thr,Arg371Ile	Phe313Ser,Ser258Leu
MP1787	2017-09-09	na	na	HB-11007	region25	Cluster45	no	WT	Lys76Thr	CVIET	Ala220Ser,Gln271Glu,Asn326Ser,Ile356Thr,Arg371Ile	Phe313Ser,Ser258Leu
MP1974	2017-11-07	2015-08-09	after	PD-0372	region35	Cluster46	no	WT	Lys76Thr	CVIET	Ala220Ser,Gln271Glu,Asn326Ser,Ile356Thr,Arg371Ile	Lys541Asn,Phe313Ser
MP2301	2017-12-11	na	na	MN-0377	region35	Cluster46	no	WT	Lys76Thr	CVIET	Ala220Ser,Gln271Glu,Asn326Ser,Ile356Thr,Arg371Ile	na
MP2382	2017-12-15	na	na	KL-0394	region35	Cluster46	YES-2017	WT	Lys76Thr	CVIET	Ala220Ser,Gln271Glu,Asn326Ser,Ile356Thr,Arg371Ile	Lys541Asn,Phe313Ser
MP2419	2017-12-25	na	na	MN-0377	region35	Cluster46	no	WT	Lys76Thr	CVIET	Ala220Ser,Gln271Glu,Asn326Ser,Ile356Thr,Arg371Ile	Lys541Asn,Phe313Ser
MP3412	2018-04-27	na	na	KL-0394	region35	Cluster46	no	WT	Lys76Thr	CVIET	Ala220Ser,Gln271Glu,Asn326Ser,Ile356Thr,Arg371Ile	Lys541Asn,Phe313Ser
MP3978	2018-06-21	2015-08-09	after	PD-0372	region35	Cluster46	no	WT	Lys76Thr	CVIET	Ala220Ser,Gln271Glu,Asn326Ser,Ile356Thr,Arg371Ile	Lys541Asn,Phe313Ser
MP3964	2018-06-29	na	na	PT-0395	region35	Cluster46	no	WT	Lys76Thr	CVIET	Ala220Ser,Gln271Glu,Asn326Ser,Ile356Thr,Arg371Ile	Lys541Asn,Phe313Ser
MP3804	2018-08-06	na	na	MK-0428	region37	Cluster46	YES-2018	WT	Lys76Thr	CVIET	Ala220Ser,Gln271Glu,Asn326Ser,Ile356Thr,Arg371Ile	Lys541Asn,Phe313Ser
MP0123	2016-06-16	na	na	TG-250A	region15	Cluster47	YES-2016	F446I	Lys76Thr	CVIET	Ala220Ser,Gln271Glu,Asn326Ser,Ile356Thr,Arg371Ile	Lys541Asn,Phe313Ser
MP1988	2017-10-31	na	na	MT-0432	region16	Cluster47	YES-2017	F446I	Lys76Thr	CVIET	Ala220Ser,Gln271Glu,Asn326Ser,Ile356Thr,Arg371Ile	Lys541Asn,Phe313Ser
MP2772	2018-01-30	na	na	NH-0402A	region24	Cluster47	YES-2018	F446I	Lys76Thr	CVIET	Ala220Ser,Gln271Glu,Asn326Ser,Ile356Thr,Arg371Ile	Lys541Asn,Phe313Ser
MP3198	2018-04-02	na	na	MP-0412A	region24	Cluster47	no	F446I	Lys76Thr	CVIET	Ala220Ser,Gln271Glu,Asn326Ser,Ile356Thr,Arg371Ile	Lys541Asn,Phe313Ser
MP3174	2018-04-03	na	na	MP-0412A	region24	Cluster47	no	F446I	Lys76Thr	CVIET	Ala220Ser,Gln271Glu,Asn326Ser,Ile356Thr,Arg371Ile	Lys541Asn,Phe313Ser
MP3175	2018-04-04	na	na	MP-0412A	region24	Cluster47	no	F446I	Lys76Thr	CVIET	Ala220Ser,Gln271Glu,Asn326Ser,Ile356Thr,Arg371Ile	Lys541Asn,Phe313Ser
MP1371	2017-06-08	2016-03-20	after	PN-0199A	region22	Cluster48	no	WT	Lys76Thr	CVIET	Ala220Ser,Gln271Glu,Arg371Ile	Lys541Asn,Phe313Ser
MP1414	2017-06-12	na	na	KL-11013	region35	Cluster48	YES-2017	WT	Lys76Thr	CVIET	Ala220Ser,Gln271Glu,Asn326Ser,Ile356Thr,Arg371Ile	Lys541Asn,Phe313Ser
MP1061	2017-06-21	na	na	NA	na	Cluster48	no	WT	Lys76Thr	CVIET	Ala220Ser,Gln271Glu,Asn326Ser,Ile356Thr,Arg371Ile	Lys541Asn,Phe313Ser
MP1611	2017-07-12	2015-08-14	after	PT-0282	region32	Cluster48	no	WT	Lys76Thr	CVIET	Ala220Ser,Gln271Glu,Asn326Ser,Ile356Thr,Arg371Ile	Lys541Asn,Phe313Ser
MP1850	2017-10-04	na	na	HS-0364	region31	Cluster48	no	WT	Lys76Thr	CVIET	Ala220Ser,Gln271Glu,Asn326Ser,Ile356Thr,Arg371Ile	Lys541Asn,Phe313Ser
MP4048	2018-05-30	na	na	CL-0335	region36	Cluster48	no	WT	Lys76Thr	CVIET	Ala220Ser,Gln271Glu,Asn326Ser,Ile356Thr,Arg371Ile	Lys541Asn,Phe313Ser
MP0001	2016-04-18	na	na	KP-0818	region49	Cluster49	YES-2016	C469Y	Lys76Thr	CVIET	Ala220Ser,Gln271Glu,Asn326Ser,Ile356Thr,Arg371Ile	Lys541Asn,Phe313Ser
MP0004	2016-06-20	na	na	YT-0819	region49	Cluster49	no	C469Y	Lys76Thr	CVIET	Gln271Glu,Asn326Ser,Ile356Thr,Arg371Ile	Lys541Asn,Phe313Ser
MP0932	2017-03-06	na	na	KP-0818	region49	Cluster49	YES-2017	C469Y	Lys76Thr	CVIET	Ala220Ser,Gln271Glu,Asn326Ser,Ile356Thr,Arg371Ile	Lys541Asn,Phe313Ser
MP1056	2017-05-08	na	na	NA	na	Cluster49	no	C469Y	Lys76Thr	CVIET	Ala220Ser,Gln271Glu,Asn326Ser,Ile356Thr,Arg371Ile	Lys541Asn,Phe313Ser
MP1937	2017-06-06	na	na	KL-0845	region48	Cluster49	no	C469Y	Lys76Thr	CVIET	Ala220Ser,Gln271Glu,Asn326Ser,Ile356Thr,Arg371Ile	Lys541Asn,Phe313Ser
MP1938	2017-06-06	na	na	KL-0845	region48	Cluster49	no	C469Y	Lys76Thr	CVIET	Ala220Ser,Gln271Glu,Asn326Ser,Ile356Thr,Arg371Ile	Lys541Asn,Phe313Ser
MP0169	2016-06-20	na	na	DL-262A	region25	Cluster50	YES-2016	G449A	Lys76Thr	CVIET	Ala220Ser,Gln271Glu,Asn326Ser,Ile356Thr,Arg371Ile	Lys541Asn,Phe313Ser
MP0194	2016-06-21	na	na	TR-11006	region25	Cluster50	no	G449A	Lys76Thr	CVIET	Ala220Ser,Gln271Glu,Asn326Ser,Ile356Thr,Arg371Ile	Lys541Asn,Phe313Ser
MS0016	2016-06-23	2017-07-12	before	HD-0363D	region30	Cluster50	no	G449A	Lys76Thr	CVIET	Ala220Ser,Gln271Glu,Asn326Ser,Ile356Thr,Arg371Ile	Lys541Asn,Phe313Ser
MP0399	2016-09-23	na	na	HS-0364	region31	Cluster50	no	G449A	Lys76Thr	CVIET	Ala220Ser,Gln271Glu,Asn326Ser,Ile356Thr,Arg371Ile	Lys541Asn,Phe313Ser
MP1583	2017-07-11	na	na	MM-11004	region30	Cluster50	YES-2017	G449A	Lys76Thr	CVIET	Ala220Ser,Gln271Glu,Asn326Ser,Ile356Thr,Arg371Ile	Lys541Asn,Phe313Ser
MP0030	NA	na	na	KL-0268E	region25	Cluster50	no	G449A	Lys76Thr	CVIET	Ala220Ser,Gln271Glu,Asn326Ser,Ile356Thr,Arg371Ile	Lys541Asn,Phe313Ser
MP4183	2018-11-16	na	na	PS-11064A	region30	Cluster51	YES-2018	WT	Lys76Thr	CVIET	Ala220Ser,Gln271Glu,Asn326Ser,Ile356Thr,Arg371Ile	Gly308Glu,Ser258Leu
MP4317	2018-11-26	na	na	PS-11064A	region30	Cluster51	no	WT	Lys76Thr	CVIET	Ala220Ser,Gln271Glu,Asn326Ser,Ile356Thr,Arg371Ile	Gly308Glu,Ser258Leu
MP4623	2019-06-22	2015-09-12	after	HT-0323	region30	Cluster51	YES-2019	WT	Lys76Thr	CVIET	Ala220Ser,Gln271Glu,Asn326Ser,Ile356Thr,Arg371Ile	Gly308Glu,Ser258Leu
MP4651	2019-06-27	na	na	HS-0364	region31	Cluster51	no	WT	Lys76Thr	CVIET	Ala220Ser,Gln271Glu,Asn326Ser,Ile356Thr,Arg371Ile	Ser258Leu
MP4769	2019-10-23	na	na	PL-0374B	region34	Cluster51	no	WT	Lys76Thr	CVIET	Ala220Ser,Gln271Glu,Ile356Thr,Arg371Ile	Gly308Glu,Ser258Leu
MP0279	2016-06-09	na	na	KL-0767	region48	Cluster52	no	WT	na	na	Ile356Thr	Lys541Asn,Phe313Ser
MP0236	2016-06-10	na	na	KL-0767	region48	Cluster52	YES-2016	WT	Lys76Thr	CVIET	Ala220Ser,Gln271Glu,Asn326Ser,Ile356Thr,Arg371Ile	Lys541Asn,Phe313Ser
MP0237	2016-06-10	na	na	KL-0767	region48	Cluster52	no	WT	Lys76Thr	CVIET	Ala220Ser,Gln271Glu,Asn326Ser,Ile356Thr,Arg371Ile	Lys541Asn,Phe313Ser
MP1067	2017-05-24	na	na	KK-0824	region48	Cluster52	no	WT	Lys76Thr	CVIET	Ala220Ser,Gln271Glu,Asn326Ser,Ile356Thr,Arg371Ile	Phe313Ser
MP1063	2017-06-26	na	na	NA	na	Cluster52	YES-2017	WT	Lys76Thr	CVIET	Ala220Ser,Gln271Glu,Asn326Ser,Ile356Thr,Arg371Ile	Lys541Asn,Phe313Ser
METF.HRP.34	2016-06-18	na	na	HG-0369	region35	Cluster53	YES-2016	WT	Lys76Thr	CVIET	Ala220Ser,Gln271Glu,Asn326Ser,Ile356Thr,Arg371Ile	Lys541Asn,Phe313Ser
MS0117	2016-11-21	2017-07-11	before	WM-0367	region35	Cluster53	no	WT	Lys76Thr	CVIET	Ala220Ser,Gln271Glu,Asn326Ser,Ile356Thr,Arg371Ile	Lys541Asn,Phe313Ser
MP0849	2017-01-24	2017-07-11	before	WM-0367	region35	Cluster53	no	WT	Lys76Thr	CVIET	Ala220Ser,Gln271Glu,Asn326Ser,Ile356Thr,Arg371Ile	Lys541Asn,Phe313Ser
MP0746	2017-02-13	na	na	KL-11013	region35	Cluster53	no	WT	Lys76Thr	CVIET	Ala220Ser,Gln271Glu,Asn326Ser,Ile356Thr,Arg371Ile	Lys541Asn,Phe313Ser
MP1129	2017-08-05	na	na	MK-0426	region37	Cluster53	YES-2017	WT	Lys76Thr	CVIET	Ala220Ser,Gln271Glu,Asn326Ser,Ile356Thr,Arg371Ile	Lys541Asn,Phe313Ser
MP0686	2017-01-16	na	na	LK-0319A	region21	Cluster54	YES-2017	WT	Lys76Thr	CVIET	Ala220Ser	Lys541Asn,Phe313Ser
MP3622	2018-06-11	na	na	WW-0381	region26	Cluster54	no	WT	Lys76Thr	CVIET	Ala220Ser,Gln271Glu,Asn326Ser,Ile356Thr,Arg371Ile	Lys541Asn,Phe313Ser
MP3895	2018-06-18	na	na	KP-0344B	region28	Cluster54	no	WT	Lys76Thr	CVIET	Ala220Ser,Gln271Glu,Asn326Ser,Ile356Thr,Arg371Ile	Lys541Asn,Phe313Ser
MP3920	2018-06-18	na	na	KP-0344A	region28	Cluster54	no	WT	Lys76Thr	CVIET	Ala220Ser,Gln271Glu,Ile356Thr,Arg371Ile	Lys541Asn,Phe313Ser
MP3877	2018-06-19	na	na	KP-0344A	region28	Cluster54	YES-2018	WT	Lys76Thr	CVIET	Ala220Ser,Gln271Glu,Asn326Ser,Ile356Thr,Arg371Ile	Lys541Asn,Phe313Ser
MP0270	2016-01-26	na	na	OT-0268D	region25	Cluster55	no	F446I	Lys76Thr	CVIET	Ala220Ser,Gln271Glu,Asn326Ser,Ile356Thr,Arg371Ile	Lys541Asn,Phe313Ser
MP0189	2016-07-18	na	na	HB-0269A	region25	Cluster55	YES-2016	F446I	Lys76Thr	CVIET	Ala220Ser,Gln271Glu,Asn326Ser,Ile356Thr,Arg371Ile	Lys541Asn,Phe313Ser
MP0340	2016-08-16	na	na	TM-298C	region23	Cluster55	no	F446I	Lys76Thr	CVIET	Ala220Ser,Gln271Glu,Asn326Ser,Ile356Thr,Arg371Ile	Lys541Asn,Phe313Ser
MS0102	2016-11-20	2017-07-04	before	LK-0350	region33	Cluster55	no	F446I	Lys76Thr	CVIET	Ala220Ser,Gln271Glu,Asn326Ser,Ile356Thr,Arg371Ile	Lys541Asn,Phe313Ser
MS0110	2016-11-20	2017-07-04	before	LK-0350	region33	Cluster56	YES-2016	R561H	Lys76Thr	CVIET	Ala220Ser,Gln271Glu,Asn326Ser,Ile356Thr,Arg371Ile	Phe313Ser,Ser258Leu
MS0111	2016-11-20	2017-07-04	before	LK-0350	region33	Cluster56	no	R561H	Lys76Thr	CVIET	Gln271Glu,Asn326Ser,Ile356Thr	Phe313Ser,Ser258Leu
MP2513	2017-12-19	2017-06-24	after	MM-0363A	region33	Cluster56	YES-2017	R561H	Lys76Thr	CVIET	Ala220Ser,Gln271Glu,Asn326Ser,Ile356Thr,Arg371Ile	Phe313Ser,Ser258Leu
MP2968	2018-02-01	na	na	PS-11064A	region30	Cluster56	YES-2018	R561H	Lys76Thr	CVIET	Ala220Ser,Gln271Glu,Asn326Ser,Ile356Thr,Arg371Ile	Phe313Ser,Ser258Leu
MP4421	2018-12-14	na	na	BB-0316	region32	Cluster57	YES-2018	WT	Lys76Thr	CVIET	Ala220Ser,Gln271Glu,Asn326Ser,Ile356Thr,Arg371Ile	Lys541Asn,Phe313Ser
MP4509	2019-03-25	na	na	BB-0316	region32	Cluster57	no	WT	Lys76Thr	CVIET	Ala220Ser,Gln271Glu,Asn326Ser,Ile356Thr,Arg371Ile	Lys541Asn,Phe313Ser
MP4477	2019-04-01	na	na	LK-0236	region27	Cluster57	no	WT	Lys76Thr	CVIET	Ala220Ser,Gln271Glu,Asn326Ser,Ile356Thr,Arg371Ile	Lys541Asn,Phe313Ser
MP4493	2019-04-01	na	na	BB-0316	region32	Cluster57	YES-2019	WT	Lys76Thr	CVIET	Ala220Ser,Gln271Glu,Asn326Ser,Ile356Thr,Arg371Ile	Lys541Asn,Phe313Ser
MP1263	2017-06-12	na	na	MG-0261B	region11	Cluster58	no	WT	Lys76Thr	CVIET	Ala220Ser,Gln271Glu,Asn326Ser,Ile356Thr,Arg371Ile	Lys541Asn,Phe313Ser
MP1330	2017-06-13	na	na	MG-0261B	region11	Cluster58	YES-2017	WT	Lys76Thr	CVIET	Ala220Ser,Gln271Glu,Asn326Ser,Ile356Thr,Arg371Ile	Lys541Asn,Phe313Ser
MP1128	2017-08-01	na	na	DB-0145B	region10	Cluster58	no	WT	Lys76Thr	CVIET	Ala220Ser,Gln271Glu,Asn326Ser,Ile356Thr,Arg371Ile	Lys541Asn,Phe313Ser
MP1080	2017-08-21	2016-09-02	after	MG-0261A	region11	Cluster58	no	WT	Lys76Thr	CVIET	Ala220Ser,Gln271Glu,Asn326Ser,Ile356Thr,Arg371Ile	Lys541Asn,Phe313Ser
MP1690	2017-06-27	na	na	MN-268C	region25	Cluster59	no	WT	Lys76Thr	CVIET	Ala220Ser,Gln271Glu,Asn326Ser,Ile356Thr,Arg371Ile	Ser258Leu
MP1687	2017-07-06	na	na	HB-11007	region25	Cluster59	no	WT	Lys76Thr	CVIET	Ala220Ser,Gln271Glu,Asn326Ser,Ile356Thr,Arg371Ile	Ser258Leu
MP1614	2017-07-12	na	na	MN-268C	region25	Cluster59	no	NA	Lys76Thr	CVIET	Ala220Ser,Gln271Glu,Ile356Thr,Arg371Ile	Ser258Leu
MP1089	2017-08-15	na	na	KL-0268E	region25	Cluster59	YES-2017	WT	Lys76Thr	CVIET	Ala220Ser,Gln271Glu,Asn326Ser,Ile356Thr,Arg371Ile	Ser258Leu
MP0461	2016-11-15	2015-08-09	after	PD-0372	region35	Cluster60	YES-2016	WT	Lys76Thr	CVIET	Ala220Ser,Gln271Glu,Asn326Ser,Ile356Thr,Arg371Ile	Lys541Asn,Phe313Ser
MP0455	2016-11-16	2015-08-09	after	PD-0372	region35	Cluster60	no	WT	Lys76Thr	CVIET	Ala220Ser,Gln271Glu,Asn326Ser,Ile356Thr,Arg371Ile	Lys541Asn,Phe313Ser
MP1720	2017-07-10	2015-08-09	after	PD-0372	region35	Cluster60	YES-2017	WT	Lys76Thr	CVIET	Ala220Ser,Gln271Glu,Asn326Ser,Ile356Thr,Arg371Ile	Lys541Asn,Phe313Ser
MP1729	2017-07-15	2015-08-09	after	PD-0372	region35	Cluster60	no	WT	Lys76Thr	CVIET	Ala220Ser,Gln271Glu,Asn326Ser,Ile356Thr,Arg371Ile	Lys541Asn,Phe313Ser
MP0059	2016-07-30	na	na	KL-0394	region35	Cluster61	YES-2016	R561H	Lys76Thr	CVIET	Ala220Ser,Gln271Glu,Asn326Ser,Ile356Thr,Arg371Ile	Phe313Ser,Ser258Leu
MP0413	2016-09-16	na	na	MP-0440	region37	Cluster61	no	R561H	Lys76Thr	CVIET	Ala220Ser,Gln271Glu,Asn326Ser,Ile356Thr,Arg371Ile	Phe313Ser,Ser258Leu
MP1034	2016-11-20	na	na	MP-0440	region37	Cluster61	no	NA	Lys76Thr	CVIET	Ala220Ser,Gln271Glu,Asn326Ser,Ile356Thr,Arg371Ile	Phe313Ser,Ser258Leu
MP1039	2016-11-21	na	na	MP-0440	region37	Cluster61	no	R561H	Lys76Thr	CVIET	Ala220Ser,Gln271Glu,Asn326Ser,Ile356Thr,Arg371Ile	Phe313Ser,Ser258Leu
MP0063	2016-06-20	na	na	CK-11052A	region14	Cluster62	YES-2016	WT	Lys76Thr	CVIET	Ala220Ser,Gln271Glu,Asn326Ser,Ile356Thr,Arg371Ile	Lys541Asn,Phe313Ser
MP0468	2016-11-17	na	na	PP-11050A	region14	Cluster62	no	WT	Lys76Thr	CVIET	Ala220Ser,Gln271Glu,Asn326Ser,Ile356Thr,Arg371Ile	Lys541Asn,Phe313Ser
MP3163	2018-03-27	na	na	TM-0308	region14	Cluster62	YES-2018	WT	Lys76Thr	CVIET	Ala220Ser,Gln271Glu,Asn326Ser,Ile356Thr,Arg371Ile	Lys541Asn,Phe313Ser
MP3184	2018-03-27	na	na	DB-0145B	region10	Cluster62	no	WT	Lys76Thr	CVIET	Ala220Ser,Gln271Glu,Asn326Ser,Ile356Thr,Arg371Ile	Lys541Asn,Phe313Ser
MP4814	2020-03-21	2020-05-02	before	HH-0431	region37	Cluster63	no	WT	Lys76Thr	CVIET	Ala220Ser,Gln271Glu,Asn326Ser,Ile356Thr,Arg371Ile	Lys541Asn,Phe313Ser
MP4844	2020-05-19	na	na	MP-0440	region37	Cluster63	no	WT	Lys76Thr	CVIET	Ala220Ser,Gln271Glu,Asn326Ser,Ile356Thr,Arg371Ile	Lys541Asn,Phe313Ser
MP4840	2020-06-08	na	na	KL-11013	region35	Cluster63	YES-2020	WT	Lys76Thr	CVIET	Ala220Ser,Gln271Glu,Asn326Ser,Ile356Thr,Arg371Ile	Lys541Asn,Phe313Ser
MP4929	2020-06-08	na	na	KL-11013	region35	Cluster63	no	WT	Lys76Thr	CVIET	Ala220Ser,Gln271Glu,Asn326Ser,Ile356Thr,Arg371Ile	Lys541Asn,Phe313Ser
MP0130	2016-07-28	na	na	KP-0344A	region28	Cluster64	YES-2016	WT	Lys76Thr	CVIET	Ala220Ser,Gln271Glu,Asn326Ser,Ile356Thr,Arg371Ile	Lys541Asn,Phe313Ser
MP0350	2016-08-16	na	na	KP-0344B	region28	Cluster64	no	WT	Lys76Thr	CVIET	Ala220Ser,Gln271Glu,Asn326Ser,Ile356Thr,Arg371Ile	Lys541Asn,Phe313Ser
MP0337	2016-08-25	na	na	PH-0356A	region31	Cluster64	no	WT	Lys76Thr	CVIET	Ala220Ser,Gln271Glu,Asn326Ser,Ile356Thr,Arg371Ile	Lys541Asn,Phe313Ser
MP4278	2018-12-06	na	na	PS-11064A	region30	Cluster65	no	WT	Lys76Thr	CVIET	Ala220Ser,Gln271Glu,Asn326Ser,Ile356Thr,Arg371Ile	Gly308Glu,Ser258Leu
METF.HRP.13	2018-12-18	na	na	LK-0350	region33	Cluster65	YES-2018	WT	Lys76Thr	CVIET	Ala220Ser,Gln271Glu,Asn326Ser,Ile356Thr,Arg371Ile	Gly308Glu,Ser258Leu
MP4435	2019-02-04	2017-06-24	after	MM-0363A	region33	Cluster65	YES-2019	WT	Lys76Thr	CVIET	Gln271Glu,Asn326Ser,Ile356Thr,Arg371Ile	Gly308Glu,Ser258Leu
MP3222	2018-03-07	na	na	KH-0213A	region15	Cluster66	no	WT	Lys76Thr	CVIET	Ala220Ser,Gln271Glu,Asn326Ser,Ile356Thr,Arg371Ile	Lys541Asn,Phe313Ser
MP4202	2018-11-08	na	na	PN-0196	region12	Cluster66	YES-2018	WT	Lys76Thr	CVIET	Ala220Ser,Gln271Glu,Asn326Ser,Ile356Thr,Arg371Ile	Lys541Asn,Phe313Ser
MP4296	2018-12-20	na	na	PN-0196	region12	Cluster66	no	WT	Lys76Thr	CVIET	Ala220Ser,Gln271Glu,Asn326Ser,Ile356Thr,Arg371Ile	Lys541Asn,Phe313Ser
MP1640	2017-07-18	2015-08-09	after	PD-0372	region35	Cluster67	YES-2017	WT	Lys76Thr	CVIET	Ala220Ser,Gln271Glu,Asn326Ser,Ile356Thr,Arg371Ile	Ser258Leu
MP2977	2018-01-17	2017-06-30	after	MK-363E	region30	Cluster67	no	WT	Lys76Thr	CVIET	Ala220Ser,Gln271Glu,Asn326Ser,Ile356Thr,Arg371Ile	Ser258Leu
MP4372	2018-12-04	na	na	LK-0331	region33	Cluster67	YES-2018	WT	Lys76Thr	CVIET	Ala220Ser,Gln271Glu,Asn326Ser,Ile356Thr,Arg371Ile	Ser258Leu
MP0978	2017-03-20	na	na	BB-0316	region32	Cluster68	no	WT	Lys76Thr	CVIET	Ala220Ser,Gln271Glu,Asn326Ser,Ile356Thr,Arg371Ile	Phe313Ser,Ser258Leu
MP1271	2017-06-22	na	na	BB-0316	region32	Cluster68	YES-2017	WT	Lys76Thr	CVIET	Ala220Ser,Gln271Glu,Asn326Ser,Ile356Thr,Arg371Ile	Phe313Ser,Ser258Leu
MP1608	2017-07-03	na	na	BB-0316	region32	Cluster68	no	WT	Lys76Thr	CVIET	Ala220Ser,Gln271Glu,Ile356Thr,Arg371Ile	Phe313Ser,Ser258Leu
MP1020	2017-01-18	2015-08-09	after	PD-0372	region35	Cluster69	no	WT	na	na	Gln271Glu	Lys541Asn,Phe313Ser
MP1362	2017-06-14	na	na	MN-0377	region35	Cluster69	YES-2017	WT	Lys76Thr	CVIET	Ala220Ser,Gln271Glu,Asn326Ser,Ile356Thr,Arg371Ile	Lys541Asn,Phe313Ser
MP1365	2017-06-21	na	na	KL-11013	region35	Cluster69	no	WT	Lys76Thr	CVIET	Ala220Ser,Gln271Glu,Asn326Ser,Ile356Thr,Arg371Ile	Lys541Asn,Phe313Ser
MP1044	2017-01-07	na	na	KL-11013	region35	Cluster70	YES-2017	G449A	Lys76Thr	CVIET	Ala220Ser,Gln271Glu,Asn326Ser,Ile356Thr,Arg371Ile	Lys541Asn,Phe313Ser
MP3955	2018-06-28	na	na	LK-0462A	region37	Cluster70	YES-2018	G449A	Lys76Thr	CVIET	Ala220Ser,Gln271Glu,Asn326Ser,Ile356Thr,Arg371Ile	Lys541Asn,Phe313Ser
MP3913	2018-07-01	na	na	LK-0462A	region37	Cluster70	no	G449A	Lys76Thr	CVIET	Ala220Ser,Gln271Glu,Asn326Ser,Ile356Thr,Arg371Ile	Lys541Asn,Phe313Ser
MP0032	2016-05-17	na	na	DL-262A	region25	Cluster71	no	WT	Lys76Thr	CVIET	Ala220Ser,Gln271Glu,Asn326Ser,Ile356Thr,Arg371Ile	Lys541Asn,Phe313Ser
MP0012	2016-06-05	na	na	TR-11006	region25	Cluster71	YES-2016	WT	Lys76Thr	CVIET	Ala220Ser,Gln271Glu,Asn326Ser,Ile356Thr,Arg371Ile	Lys541Asn,Phe313Ser
MP0014	2016-06-06	na	na	TR-11006	region25	Cluster71	no	WT	Lys76Thr	CVIET	Ala220Ser,Gln271Glu,Asn326Ser,Ile356Thr,Arg371Ile	Lys541Asn,Phe313Ser
MP4551	2019-06-07	na	na	KP-08541	region44	Cluster72	no	C469Y	Lys76Thr	CVIET	Ala220Ser,Gln271Glu,Asn326Ser,Ile356Thr,Arg371IleSer420Leu	Lys541Asn,Phe313Ser
MP4550	2019-06-17	na	na	KU-12334	region43	Cluster72	no	C469Y	Lys76Thr	CVIET	Ala220Ser,Gln271Glu,Asn326Ser,Ile356Thr,Arg371IleSer420Leu	Lys541Asn,Phe313Ser
MP4711	2019-06-24	na	na	KP-0506	region40	Cluster72	YES-2019	C469Y	Lys76Thr	CVIET	Ala220Ser,Gln271Glu,Asn326Ser,Ile356Thr,Arg371Ile,Ser420Leu	Phe313Ser
MP1525	2017-06-19	2017-07-03	before	HG-0369	region35	Cluster73	no	F446I	Lys76Thr	CVIET	Ala220Ser,Gln271Glu,Asn326Ser,Ile356Thr,Arg371Ile	Lys541Asn,Phe313Ser
MP1727	2017-07-17	na	na	HT-0378A	region31	Cluster73	YES-2017	F446I	Lys76Thr	CVIET	Ala220Ser,Gln271Glu,Asn326Ser,Ile356Thr,Arg371Ile	Lys541Asn,Phe313Ser
MP2315	2017-12-04	na	na	ML-0363B	region30	Cluster73	no	F446I	Lys76Thr	CVIET	Ala220Ser,Gln271Glu,Asn326Ser,Ile356Thr,Arg371Ile	Lys541Asn,Phe313Ser
MP4791	2019-10-31	na	na	GY-0010A	region1	Cluster74	no	NA	Lys76Thr	CVIET	Ala220Ser,Gln271Glu,Asn326Ser,Ile356Thr,Arg371Ile	Ser258Leu
MP4768	2019-11-14	na	na	TK-0016A	region3	Cluster74	YES-2019	WT	Lys76Thr	CVIET	Ala220Ser,Gln271Glu,Asn326Ser,Ile356Thr,Arg371Ile	Ser258Leu
MP4785	2020-01-08	na	na	TD-0021	region3	Cluster74	YES-2020	WT	Lys76Thr	CVIET	Ala220Ser,Gln271Glu,Asn326Ser,Ile356Thr,Arg371Ile	Ser258Leu
METF.HRP.15	2015-12-21	na	na	TM-0429	region38	Cluster75	no	F446I	Lys76Thr	CVIET	Ala220Ser,Gln271Glu,Asn326Ser,Ile356Thr,Arg371Ile	Lys541Asn,Phe313Ser
MP1995	2017-11-24	na	na	ML-0458A	region38	Cluster75	YES-2017	F446I	Lys76Thr	CVIET	Ala220Ser,Gln271Glu,Asn326Ser,Ile356Thr,Arg371Ile	Lys541Asn,Phe313Ser
MP0054	2016-03-03	na	na	KL-0820	region49	Cluster76	no	C469Y	Lys76Thr	CVIET	Ala220Ser,Gln271Glu,Asn326Ser,Ile356Thr,Arg371Ile	Phe313Ser,Ser258Leu
MP0005	2016-04-24	na	na	KL-0820	region49	Cluster76	YES-2016	C469Y	Lys76Thr	CVIET	Ala220Ser,Gln271Glu,Asn326Ser,Ile356Thr,Arg371Ile	Phe313Ser,Ser258Leu
MP0758	2017-02-20	na	na	TM-298C	region23	Cluster77	YES-2017	WT	Lys76Thr	CVIET	Ala220Ser,Gln271Glu,Asn326Ser,Ile356Thr,Arg371Ile	Lys541Asn,Phe313Ser
MP0035	NA	na	na	KL-0268E	region25	Cluster77	no	WT	Lys76Thr	CVIET	Ala220Ser,Gln271Glu,Asn326Ser,Ile356Thr,Arg371Ile	Lys541Asn,Phe313Ser
MP0076	2016-07-25	na	na	MN-0377	region35	Cluster78	YES-2016	G449A	Lys76Thr	CVIET	Ala220Ser,Gln271Glu,Asn326Ser,Ile356Thr,Arg371Ile	Lys541Asn,Phe313Ser
MP0375	2016-09-05	2015-08-09	after	PD-0372	region35	Cluster78	no	G449A	Lys76Thr	CVIET	Ala220Ser,Gln271Glu,Asn326Ser	Lys541Asn,Phe313Ser
MP0124	2016-06-22	na	na	KW-0296A	region17	Cluster79	no	F446I	Lys76Thr	CVIET	Ala220Ser,Gln271Glu,Asn326Ser,Ile356Thr,Arg371Ile	Gly308Glu,Ser258Leu
MP0159	2016-07-16	2016-09-12	before	WT-0297	region13	Cluster79	YES-2016	F446I	Lys76Thr	CVIET	Ala220Ser,Gln271Glu,Asn326Ser,Ile356Thr,Arg371Ile	Gly308Glu,Ser258Leu
MP0167	2016-06-21	na	na	MH-0298A	region23	Cluster80	no	F446I	Lys76Thr	CVIET	Ala220Ser,Gln271Glu,Asn326Ser,Ile356Thr,Arg371Ile	Lys541Asn,Phe313Ser
MP0208	2016-06-25	na	na	NG-0359A	region28	Cluster80	YES-2016	F446I	Lys76Thr	CVIET	Ala220Ser,Gln271Glu,Asn326Ser,Ile356Thr,Arg371Ile	Lys541Asn,Phe313Ser
MP0263	2016-04-05	na	na	TR-11006	region25	Cluster81	YES-2016	WT	Lys76Thr	CVIET	Ala220Ser,Gln271Glu,Asn326Ser,Ile356Thr,Arg371Ile	Lys541Asn,Phe313Ser
MP0267	2016-04-05	na	na	TR-11006	region25	Cluster81	no	WT	Lys76Thr	CVIET	Ala220Ser,Gln271Glu,Asn326Ser,Ile356Thr,Arg371Ile	Lys541Asn,Phe313Ser
MP0558	2016-12-25	na	na	PH-0356A	region31	Cluster82	YES-2016	P441L	Lys76Thr	CVIET	Ala220Ser,Gln271Glu,Asn326Ser,Ile356Thr,Arg371Ile	Lys541Asn,Phe313Ser
MP0793	2017-01-20	na	na	PH-0356A	region31	Cluster82	YES-2017	P441L	Lys76Thr	CVIET	Ala220Ser,Gln271Glu,Asn326Ser,Ile356Thr,Arg371Ile	Lys541Asn,Phe313Ser
MP0559	2016-12-19	na	na	PP-0338A	region19	Cluster83	no	WT	Lys76Thr	CVIET	Gln271Glu,Asn326Ser,Ile356Thr,Arg371Ile	Lys541Asn,Phe313Ser
MP0670	2016-12-19	na	na	ML-0380A	region24	Cluster83	YES-2016	WT	Lys76Thr	CVIET	Ala220Ser,Gln271Glu,Asn326Ser,Ile356Thr,Arg371Ile	Lys541Asn,Phe313Ser
MP0562	2016-12-25	na	na	PT-0395	region35	Cluster84	YES-2016	WT	Lys76Thr	CVIET	Ile356Thr,Arg371Ile	Lys541Asn,Phe313Ser
MP1672	2017-07-24	na	na	PT-0395	region35	Cluster84	YES-2017	WT	Lys76Thr	CVIET	Ala220Ser,Gln271Glu,Asn326Ser,Ile356Thr,Arg371Ile	Lys541Asn,Phe313Ser
MP0852	2017-01-25	2017-07-11	before	WM-0367	region35	Cluster85	YES-2017	R561H	Lys76Thr	CVIET	Ala220Ser,Gln271Glu,Asn326Ser,Ile356Thr,Arg371Ile	Lys541Asn,Phe313Ser
MP1452	2017-06-16	2017-07-04	before	NT-0361	region33	Cluster85	no	R561H	Lys76Thr	CVIET	Ala220Ser,Gln271Glu,Asn326Ser,Ile356Thr,Arg371Ile	Lys541Asn,Phe313Ser
MP1564	2017-05-20	2017-07-04	before	TP-0339	region33	Cluster86	no	WT	Lys76Thr	CVIET	Ala220Ser,Gln271Glu,Asn326Ser,Ile356Thr,Arg371Ile	Ser258Leu
MP1623	2017-06-29	na	na	LK-0331	region33	Cluster86	YES-2017	WT	Lys76Thr	CVIET	Ala220Ser,Gln271Glu,Asn326Ser,Ile356Thr,Arg371Ile	Ser258Leu
MP2058	2017-10-23	2017-07-04	after	NT-0361	region33	Cluster87	YES-2017	F446I	Lys76Thr	CVIET	Ala220Ser,Gln271Glu,Asn326Ser,Ile356Thr,Arg371Ile	Ser258Leu
MP2795	2018-02-13	na	na	MG-0261B	region11	Cluster87	YES-2018	F446I	Lys76Thr	CVIET	Ala220Ser,Gln271Glu,Asn326Ser,Ile356Thr,Arg371Ile	Gly308Glu,Ser258Leu
MP2260	2017-11-29	na	na	MM-11004	region30	Cluster88	no	F446I	Lys76Thr	CVIET	Ala220Ser,Gln271Glu,Asn326Ser,Ile356Thr,Arg371Ile	Lys541Asn,Phe313Ser
MP2162	2017-12-06	na	na	MM-11004	region30	Cluster88	YES-2017	F446I	Lys76Thr	CVIET	Ala220Ser,Gln271Glu,Asn326Ser,Ile356Thr,Arg371Ile	Lys541Asn,Phe313Ser
MP2331	2017-12-06	na	na	HB-0340A	region28	Cluster89	no	G449A	Lys76Thr	CVIET	Ala220Ser,Gln271Glu,Asn326Ser,Ile356Thr,Arg371Ile	Gly308Glu,Ser258Leu
MP2314	2017-12-15	na	na	HB-0340A	region28	Cluster89	YES-2017	G449A	Lys76Thr	CVIET	Ala220Ser,Gln271Glu,Asn326Ser,Ile356Thr,Arg371Ile	Gly308Glu,Ser258Leu
MP2373	2017-11-03	na	na	PS-11064A	region30	Cluster90	YES-2017	P574L	Lys76Thr	CVIET	Ala220Ser,Gln271Glu,Asn326Ser,Ile356Thr,Arg371Ile	Lys541Asn,Phe313Ser
MP2961	2018-01-22	na	na	PH-0356B	region31	Cluster90	YES-2018	P574L	Lys76Thr	CVIET	Ala220Ser,Gln271Glu,Asn326Ser,Ile356Thr,Arg371Ile	Lys541Asn,Phe313Ser
MP3992	2018-07-09	na	na	PT-0395	region35	Cluster91	YES-2018	WT	Lys76Thr	CVIET	Ala220Ser,Gln271Glu,Asn326Ser,Ile356Thr,Arg371Ile	Lys541Asn,Phe313Ser
MP3980	2018-07-13	na	na	KP-0421A	region35	Cluster91	no	WT	Lys76Thr	CVIET	Ala220Ser,Gln271Glu,Asn326Ser,Ile356Thr,Arg371Ile	Lys541Asn,Phe313Ser
MP4297	2018-12-10	na	na	MK-0426	region37	Cluster92	YES-2018	F446I	Lys76Thr	CVIET	Ala220Ser,Gln271Glu,Asn326Ser,Ile356Thr,Arg371Ile	Lys541Asn,Phe313Ser
MP4932	2020-06-16	na	na	MP-0440	region37	Cluster92	YES-2020	NA	Lys76Thr	CVIET	Ala220Ser,Gln271Glu,Asn326Ser,Ile356Thr,Arg371Ile	Lys541Asn,Phe313Ser
MP4778	2019-12-17	na	na	TP-0166	region12	Cluster93	YES-2019	WT	Lys76Thr	CVIET	Cys72Ser,Ala220Ser,Asn326Asp,Ile356Leu	Ser258Leu
MP4771	2020-01-11	na	na	BT-0017A	region1	Cluster93	YES-2020	WT	Lys76Thr	CVIET	Cys72SerAla220Ser,Asn326Asp,Ile356Leu	Ser258Leu
MP0269	2016-02-04	2017-07-04	before	TM-0363F	region30	unique	YES-2016	WT	Lys76Thr	CVIET	Ala220Ser,Gln271Glu,Asn326Ser,Ile356Thr,Arg371Ile	Lys541Asn,Phe313Ser
MP0039	2016-02-05	na	na	MM-11004	region30	unique	YES-2016	WT	Lys76Thr	CVIET	Ala220Ser,Gln271Glu,Asn326Ser,Ile356Thr,Arg371Ile	Phe313Ser,Ser258Leu
MP0041	2016-03-05	na	na	TR-11006	region25	unique	YES-2016	WT	Lys76Thr	CVIET	Ala220Ser,Gln271Glu,Asn326Ser,Ile356Thr,Arg371Ile	Phe313Ser,Ser258Leu
MP0261	2016-03-11	na	na	MK-11003	region25	unique	YES-2016	WT	Lys76Thr	CVIET	Ala220Ser,Gln271Glu,Asn326Ser,Ile356Thr,Arg371Ile	Lys541Asn,Phe313Ser
MS0005	2016-06-20	na	na	KP-0344A	region28	unique	YES-2016	WT	Lys76Thr	CVIET	Ala220Ser,Gln271Glu,Ile356Thr,Arg371Ile	Lys541Asn,Phe313Ser
MP0200	2016-06-21	na	na	MN-268C	region25	unique	YES-2016	WT	Lys76Thr	CVIET	Ala220Ser,Gln271Glu,Asn326Ser,Ile356Thr,Arg371Ile	Phe313Ser,Ser258Leu
MS0024	2016-06-23	2017-07-12	before	HD-0363D	region30	unique	YES-2016	WT	Lys76Thr	CVIET	Ala220Ser,Gln271Glu,Asn326Ser,Ile356Thr,Arg371Ile	Lys541Asn,Phe313Ser
MP0141	2016-06-28	2016-08-31	before	PL-0366	region26	unique	YES-2016	P441L	Lys76Thr	CVIET	Ala220Ser,Gln271Glu,Asn326Ser,Ile356Thr,Arg371Ile	Lys541Asn,Phe313Ser
MP0157	2016-07-14	na	na	ML-0458A	region38	unique	YES-2016	E252Q	Lys76Thr	CVIET	Ala220Ser,Gln271Glu,Asn326Ser,Ile356Thr,Arg371Ile	Lys541Asn,Phe313Ser
MP0233	2016-07-15	na	na	HS-0364	region31	unique	YES-2016	G449A	Lys76Thr	CVIET	Ala220Ser,Gln271Glu,Asn326Ser,Ile356Thr,Arg371Ile	Lys541Asn,Phe313Ser
MP0291	2016-07-17	na	na	HP-0683	region45	unique	YES-2016	P441L	Lys76Thr	CVIET	Ala220Ser,Gln271Glu,Asn326Ser,Ile356Thr,Arg371Ile	Phe313Ser,Ser258Leu
MP0084	2016-07-21	na	na	MM-11004	region30	unique	YES-2016	WT	Lys76Thr	CVIET	Ala220Ser,Gln271Glu,Asn326Ser,Ile356Thr,Arg371Ile	Lys541Asn,Phe313Ser
MP0077	2016-08-07	na	na	MM-11004	region30	unique	YES-2016	WT	Lys76Thr	CVIET	Ala220Ser,Gln271Glu,Asn326Ser,Ile356Thr,Arg371Ile	Lys541Asn,Phe313Ser
MP0349	2016-08-19	na	na	NK_11800A	region11	unique	YES-2016	G533S	Lys76Thr	CVIET	Ala220Ser,Gln271Glu,Asn326Ser,Ile356Thr	Phe313Ser,Ser258Leu
MP0893	2016-08-22	2016-03-13	after	PH-0336A	region19	unique	YES-2016	WT	Lys76Thr	CVIET	Ala220Ser,Gln271Glu,Asn326Ser,Ile356Thr,Arg371Ile	Gly308Glu,Ser258Leu
MP0334	2016-08-23	na	na	KT-0433	region38	unique	YES-2016	C469F	Lys76Thr	CVIET	Ala220Ser,Gln271Glu,Asn326Ser,Ile356Thr,Arg371Ile	Phe313Ser,Ser258Leu
MP0361	2016-08-29	na	na	KL-11013	region35	unique	YES-2016	E252Q	Lys76Thr	CVIET	Gln271Glu,Ile356Thr,Arg371Ile	Phe313Ser,Ser258Leu
MP0363	2016-09-05	na	na	CK-11052A	region14	unique	YES-2016	WT	Lys76Thr	CVIET	Ala220Ser,Gln271Glu,Asn326Ser,Ile356Thr,Arg371Ile	Lys541Asn,Phe313Ser
MP0384	2016-10-06	na	na	MK-0265	region32	unique	YES-2016	G533S	Lys76Thr	CVIET	Ala220Ser,Gln271Glu,Asn326Ser,Ile356Thr,Arg371Ile	Phe313Ser,Ser258Leu
MP0094	2016-11-07	2020-05-02	before	LH-0266B	region13	unique	YES-2016	R561H	Lys76Thr	CVIET	Ala220Ser,Gln271Glu,Asn326Ser,Ile356Thr,Arg371Ile	Phe313Ser,Ser258Leu
MS0139	2016-11-21	2017-07-04	before	NT-0361	region33	unique	YES-2016	G449A	Lys76Thr	CVIET	Ala220Ser,Gln271Glu,Asn326Ser,Ile356Thr,Arg371Ile	Lys541Asn,Phe313Ser
MP0197	2016-12-07	na	na	KH-0346A	region19	unique	YES-2016	F446I	Lys76Thr	CVIET	Ala220Ser,Gln271Glu,Asn326Ser,Ile356Thr,Arg371Ile	Lys541Asn,Phe313Ser
MP0581	2017-01-07	na	na	MP-0440	region37	unique	YES-2017	WT	Lys76Thr	CVIET	Ala220Ser,Gln271Glu,Asn326Ser,Ile356Thr	Lys541Asn,Phe313Ser
MP0740	2017-02-01	na	na	PH-0356B	region31	unique	YES-2017	WT	Lys76Thr	CVIET	Ala220Ser,Gln271Glu,Asn326Ser,Ile356Thr,Arg371Ile	Lys541Asn,Phe313Ser
MP0930	2017-02-28	na	na	KP-0344A	region28	unique	YES-2017	K189T	Lys76Thr	CVIET	Ala220Ser,Gln271Glu,Asn326Ser,Ile356Thr,Arg371Ile	Phe313Ser,Ser258Leu
MP0942	2017-03-16	na	na	KL-11013	region35	unique	YES-2017	G449A	Lys76Thr	CVIET	Ala220Ser,Gln271Glu,Asn326Ser,Ile356Thr,Arg371Ile	Ser258Leu
MP1068	2017-05-07	na	na	TL-0797	na	unique	YES-2017	WT	Lys76Thr	CVIET	Ala220Ser,Gln271Glu,Asn326Ser,Ile356Thr,Arg371Ile	Lys541Asn,Phe313Ser
MP1561	2017-05-08	na	na	MH-0298A	region23	unique	YES-2017	WT	Lys76Thr	CVIET	Ala220Ser,Gln271Glu,Asn326Ser,Ile356Thr,Arg371Ile	Lys541Asn,Phe313Ser
MP1556	2017-05-29	na	na	PS-11064A	region30	unique	YES-2017	P441L	Lys76Thr	CVIET	Ala220Ser,Gln271Glu,Asn326Ser,Arg371Ile	Lys541Asn,Phe313Ser
MP1060	2017-05-30	na	na	NA	na	unique	YES-2017	F446I	Lys76Thr	CVIET	Ala220Ser,Gln271Glu,Ile356Thr,Arg371Ile	Lys541Asn,Phe313Ser
MP1940	2017-06-12	na	na	HP-0834	region48	unique	YES-2017	WT	Lys76Thr	CVIET	Ala220Ser,Gln271Glu,Asn326Ser,Ile356Thr,Arg371Ile	Lys541Asn,Phe313Ser
MP1304	2017-06-13	na	na	HB-0320A	region21	unique	YES-2017	WT	Lys76Thr	CVIET	Ala220Ser,Gln271Glu,Asn326Ser,Ile356Thr,Arg371Ile	Lys541Asn,Phe313Ser
MP1400	2017-06-14	2017-07-04	before	TP-0339	region33	unique	YES-2017	WT	Lys76Thr	CVIET	Ala220Ser,Gln271Glu,Asn326Ser,Ile356Thr,Arg371Ile	Ser258Leu
MP1273	2017-06-16	na	na	MK-11014	region32	unique	YES-2017	P441L	Lys76Thr	CVIET	Gln271Glu,Asn326Ser,Ile356Thr,Arg371Ile	Lys541Asn,Phe313Ser
MP1548	2017-06-18	na	na	HN-0337A	region21	unique	YES-2017	F446I	Lys76Thr	CVIET	Ala220Ser,Gln271Glu,Asn326Ser,Ile356Thr,Arg371Ile	Lys541Asn,Phe313Ser
MP1363	2017-06-20	na	na	BB-0316	region32	unique	YES-2017	P574L	Lys76Thr	CVIET	Ala220Ser,Gln271Glu,Asn326Ser,Ile356Thr,Arg371Ile	Phe313Ser,Ser258Leu
MP1643	2017-06-20	na	na	MM-11004	region30	unique	YES-2017	K189T	Lys76Thr	CVIET	Ala220Ser,Gln271Glu,Asn326Ser,Ile356Thr,Arg371Ile	Phe313Ser,Ser258Leu
MP1705	2017-06-22	na	na	LK-0331	region33	unique	YES-2017	WT	Lys76Thr	CVIET	Ala220Ser,Gln271Glu,Asn326Ser,Ile356Thr,Arg371Ile	Ser258Leu
MP1307	2017-06-23	2015-02-10	after	HP-0203	region18	unique	YES-2017	C580Y	Lys76Thr	CVIET	Ala220Ser,Gln271Glu,Asn326Ser,Ile356Thr,Arg371Ile	Ser258Leu
MP1638	2017-07-12	2017-07-12	before	HD-0363D	region30	unique	YES-2017	R561H	Lys76Thr	CVIET	Ala220Ser,Gln271Glu,Asn326Ser,Ile356Thr,Arg371Ile	na
MP1668	2017-07-14	na	na	HT-0378A	region31	unique	YES-2017	F446I	Lys76Thr	CVIET	Ala220Ser,Gln271Glu,Asn326Ser,Ile356Thr,Arg371Ile	Lys541Asn,Phe313Ser
MP1805	2017-09-04	na	na	LK-0331	region33	unique	YES-2017	WT	Lys76Thr	CVIET	Ala220Ser,Gln271Glu,Asn326Ser,Ile356Thr,Arg371Ile	Ser258Leu
MP1907	2017-10-19	na	na	HB-0340A	region28	unique	YES-2017	WT	Lys76Thr	CVIET	Ala220Ser,Gln271Glu,Asn326Ser,Ile356Thr,Arg371Ile	Gly308Glu,Ser258Leu
MP2105	2017-11-01	na	na	HT-0378A	region31	unique	YES-2017	NA	Lys76Thr	CVIET	Ala220Ser,Gln271Glu,Asn326Ser,Ile356Thr,Arg371Ile	Gly308Glu,Ser258Leu
MP2320	2017-11-29	na	na	HB-0340A	region28	unique	YES-2017	K189T	Lys76Thr	CVIET	Ala220Ser,Gln271Glu,Asn326Ser,Ile356Thr,Arg371Ile	Lys541Asn,Phe313Ser
MP2555	2017-12-11	na	na	CK-11052A	region14	unique	YES-2017	WT	Lys76Thr	CVIET	Ala220Ser,Gln271Glu,Asn326Ser,Arg371Ile	Lys541Asn,Phe313Ser
MP2753	2017-12-13	2016-10-10	after	PP-11700A	region16	unique	YES-2017	K189T	Lys76Thr	CVIET	Ala220Ser,Gln271Glu,Asn326Ser,Ile356Thr,Arg371Ile	Gly308Glu,Ser258Leu
MP2751	2017-12-15	na	na	AR-0267A	region15	unique	YES-2017	WT	Lys76Thr	CVIET	Ala220Ser,Gln271Glu,Ile356Thr	Lys541Asn,Phe313Ser
MP2607	2017-12-22	2015-09-12	after	HT-0323	region30	unique	YES-2017	G449A	Lys76Thr	CVIET	Ala220Ser,Gln271Glu,Asn326Ser,Ile356Thr,Arg371Ile	Lys541Asn,Phe313Ser
MP2697	2017-12-27	2017-06-30	after	MK-363C	region30	unique	YES-2017	WT	Lys76Thr	CVIET	Ala220Ser,Gln271Glu,Asn326Ser,Ile356Thr,Arg371Ile	Ser258Leu
MP2723	2017-12-28	na	na	LK-0331	region33	unique	YES-2017	F446I	Lys76Thr	CVIET	Ala220Ser,Gln271Glu,Ile356Thr,Arg371Ile	Lys541Asn,Phe313Ser
MP2548	2018-01-03	2017-07-04	after	TP-0339	region33	unique	YES-2018	NA	Lys76Thr	CVIET	Ala220Ser,Gln271Glu,Asn326Ser,Ile356Thr,Arg371Ile	Lys541Asn,Phe313Ser
MP2754	2018-02-04	na	na	KN-0293A	region17	unique	YES-2018	K189T	Lys76Thr	CVIET	Ala220Ser,Gln271Glu,Asn326Ser,Ile356Thr,Arg371Ile	Gly308Glu,Ser258Leu
MP2862	2018-02-13	na	na	MH-0298A	region23	unique	YES-2018	WT	Lys76Thr	CVIET	Ala220Ser,Gln271Glu,Asn326Ser,Ile356Thr,Arg371Ile	Ser258Leu
MP3149	2018-03-19	na	na	TM-298C	region23	unique	YES-2018	WT	Lys76Thr	CVIET	Ala220Ser,Gln271Glu,Asn326Ser,Ile356Thr,Arg371Ile	Lys541Asn,Phe313Ser
MP3233	2018-03-25	2017-06-30	after	MK-363C	region30	unique	YES-2018	NA	na	na	Ala220Ser,Asn326Ser,Arg371Ile	Gly308Glu,Ser258Leu
MP3138	2018-04-02	na	na	PK-0406A	region24	unique	YES-2018	K189T	Lys76Thr	CVIET	Ala220Ser,Gln271Glu	Gly308Glu,Ser258Leu
MP3390	2018-04-20	na	na	HT-0378A	region31	unique	YES-2018	NA	Lys76Thr	CVIET	Ala220Ser,Gln271Glu,Asn326Ser,Ile356Thr,Arg371Ile	Lys541Asn,Phe313Ser
MP4002	2018-06-04	na	na	LK-0236	region27	unique	YES-2018	NA	Lys76Thr	CVIET	Ala220Ser,Asn326Ser,Ile356Thr,Arg371Ile	Phe313Ser
MP3543	2018-06-12	2017-06-24	after	MM-0363A	region33	unique	YES-2018	F446I	Lys76Thr	CVIET	Ala220Ser,Gln271Glu,Asn326Ser,Ile356Thr,Arg371Ile	Gly308Glu,Ser258Leu
MP4089	2018-06-19	2016-10-10	after	PP-11700A	region16	unique	YES-2018	K189T	Lys76Thr	CVIET	Ala220Ser,Gln271Glu,Asn326Ser,Ile356Thr,Arg371Ile	Gly308Glu,Ser258Leu
MP3952	2018-06-24	na	na	TH-0304	region23	unique	YES-2018	A621V	Lys76Thr	CVIET	Ala220Ser,Gln271Glu,Asn326Ser,Ile356Thr,Arg371Ile	Lys541Asn,Phe313Ser
MP3870	2018-07-09	na	na	HS-0364	region31	unique	YES-2018	WT	Lys76Thr	CVIET	Ala220Ser,Gln271Glu,Asn326Ser,Ile356Thr,Arg371Ile	Gly308Glu,Ser258Leu
MP3809	2018-07-17	na	na	KP-0344B	region28	unique	YES-2018	WT	Lys76Thr	CVIET	Ala220Ser,Gln271Glu,Asn326Ser,Ile356Thr,Arg371Ile	Gly308Glu,Ser258Leu
MP3792	2018-07-24	2016-10-10	after	PP-11700A	region16	unique	YES-2018	K189T	Lys76Thr	CVIET	Ala220Ser,Gln271Glu,Asn326Ser,Ile356Thr,Arg371Ile	Gly308Glu,Ser258Leu
MP4402	2018-12-03	2017-07-04	after	LK-0350	region33	unique	YES-2018	F446I	Lys76Thr	CVIET	Ala220Ser,Gln271Glu,Asn326Ser,Ile356Thr,Arg371Ile	Gly308Glu,Ser258Leu
MP4239	2019-01-14	na	na	KH-11068	region8	unique	YES-2019	F446I	Lys76Thr	CVIET	Gln271Glu,Ile356Thr,Arg371Ile	Phe313Ser
MP4285	2019-01-21	na	na	HL-0221A	region15	unique	YES-2019	S459L	WT	WT_CVMNK		Lys541Asn,Phe313Ser
MP4662	2019-07-20	na	na	MK-0426	region37	unique	YES-2019	F446I	Lys76Thr	CVIET	Ala220Ser,Gln271Glu,Asn326Ser,Ile356Thr,Arg371Ile	Phe313Ser,Ser258Leu
MP4782	2019-12-30	na	na	TD-0021	region3	unique	YES-2019	WT	Lys76Thr	CVIET	Ala220Ser,Gln271Glu,Asn326Ser,Ile356Thr,Arg371Ile	Ser258Leu
MP4797	2020-04-04	2020-05-02	before	HH-0431	region37	unique	YES-2020	WT	Lys76Thr	CVIET	Ala220Ser,Gln271Glu,Asn326Ser,Ile356Thr,Arg371Ile	Lys541Asn,Phe313Ser
MP4798	2020-04-04	2020-05-02	before	HH-0431	region37	unique	YES-2020	C580Y	Lys76Thr	CVIET	Ala220Ser,Gln271Glu,Asn326Ser,Ile356Thr,Arg371Ile	Lys541Asn,Phe313Ser
MP4799	2020-04-04	2020-05-02	before	HH-0431	region37	unique	YES-2020	C580Y	Lys76Thr	CVIET	Ala220Ser,Gln271Glu,Asn326Ser,Ile356Thr,Arg371Ile	Lys541Asn,Phe313Ser

## Sheet: Table S1.c summarystatistics
Basic stats
	Total DBS	5014
	Not sequenced	2744
	Sequenced	2270
	Low coverage	343
	Included in analysis dataset	1927
	Contain one predominant genotype	1726
kelch13 allele frequency
	kelch13 allele	2016	2017	2018	2019	2020
	WT	44.7115	37.6812	41.0035	33.7838	19.697
	P441L	11.0577	19.9678	10.3806	26.3514	1.51515
	F446I	14.9038	14.8148	16.436	16.2162	1.51515
	R561H	6.25	10.306	15.0519	9.45946	74.2424
	G449A	6.25	9.66184	8.3045	3.37838	0
	C580Y	1.44231	2.0934	2.94118	1.35135	3.0303
	M562I	7.21154	0.966184	0.692042	4.72973	0
	M476I	3.84615	2.57649	0.865052	0	0
	E252Q	0.961538	0.161031	1.90311	0	0
	G533S	0.961538	0	1.38408	2.02703	0
	C469Y	1.92308	0.644122	0	2.02703	0
	K189T	0	0.644122	0.692042	0	0
	P574L	0	0.322061	0.17301	0	0
	A621V	0	0	0.17301	0	0
	C469F	0.480769	0	0	0	0
	G718S	0	0.161031	0	0	0
	S459L	0	0	0	0.675676	0
	No. of sample	208	621	578	148	66
	No. of k13 wild-type	93	234	237	50	13
	No. of k13 mutant	115	387	341	98	53
	wild-type %	44.7115	37.6812	41.0035	33.7838	19.697
	mutant %	55.2885	62.3188	58.9965	66.2162	80.303
	Chi-squared		2.9365	0.71792	3.8539	12.183
	p-value		0.0866	0.3968	0.04963	0.0004822
IBD cluster summary
IBD cluster (r ≥ 0.9)	kelch13	Sample No.	Proportion	Accumulated proportion	Family
Cluster1	R561H	229	0.132677	0.132677	family 3
Cluster2	F446I	125	0.0724218	0.205098	family 6
Cluster3	P441L	124	0.0718424	0.276941	na
Cluster4	G449A	98	0.0567787	0.33372	family 9
Cluster5	P441L	69	0.0399768	0.373696	na
Cluster6	WT	69	0.0399768	0.413673	na
Cluster7	WT	51	0.0295481	0.443221	family 4
Cluster8	WT	44	0.0254925	0.468714	family 9
Cluster9	WT	43	0.0249131	0.493627	na
Cluster10	WT	39	0.0225956	0.516222	family 2
Cluster11	WT	35	0.0202781	0.536501	family 9
Cluster12	P441L	35	0.0202781	0.556779	family 2
Cluster13	F446I	34	0.0196987	0.576477	family 1
Cluster14	M562I	33	0.0191194	0.595597	na
Cluster15	WT	29	0.0168019	0.612399	family 9
Cluster16	WT	26	0.0150637	0.627462	family 8
Cluster17	WT	26	0.0150637	0.642526	family 1
Cluster18	WT	25	0.0144844	0.65701	family 5
Cluster19	M476I	25	0.0144844	0.671495	na
Cluster20	P441L	23	0.0133256	0.68482	na
Cluster21	WT	21	0.0121669	0.696987	na
Cluster22	WT	20	0.0115875	0.708575	na
Cluster23	WT	19	0.0110081	0.719583	family 1
Cluster24	F446I	16	0.00926999	0.728853	family 9
Cluster25	C580Y	16	0.00926999	0.738123	na
Cluster26	WT	15	0.00869061	0.746813	na
Cluster27	G533S	14	0.00811124	0.754925	na
Cluster28	F446I	13	0.00753187	0.762457	na
Cluster29	C580Y	13	0.00753187	0.769988	family 7
Cluster30	WT	13	0.00753187	0.77752	family 3
Cluster31	WT	12	0.00695249	0.784473	family 9
Cluster32	WT	12	0.00695249	0.791425	family 5
Cluster33	G449A	12	0.00695249	0.798378	family 9
Cluster34	E252Q	12	0.00695249	0.80533	na
Cluster35	F446I	11	0.00637312	0.811703	family 6
Cluster36	G718S	11	0.00637312	0.818076	family 9
Cluster37	F446I	11	0.00637312	0.82445	family 9
Cluster38	WT	10	0.00579374	0.830243	na
Cluster39	C580Y	10	0.00579374	0.836037	na
Cluster40	F446I	10	0.00579374	0.841831	family 6
Cluster41	F446I	9	0.00521437	0.847045	family 6
Cluster42	R561H	8	0.00463499	0.85168	family 3
Cluster43	WT	8	0.00463499	0.856315	family 1
Cluster44	G449A	8	0.00463499	0.86095	family 9
Cluster45	M476I	8	0.00463499	0.865585	na
Cluster46	WT	8	0.00463499	0.87022	family 7
Cluster47	F446I	6	0.00347625	0.873696	na
Cluster48	WT	6	0.00347625	0.877173	na
Cluster49	C469Y	6	0.00347625	0.880649	na
Cluster50	G449A	6	0.00347625	0.884125	family 5
Cluster51	WT	5	0.00289687	0.887022	family 1
Cluster52	WT	5	0.00289687	0.889919	na
Cluster53	WT	5	0.00289687	0.892816	family 1
Cluster54	WT	5	0.00289687	0.895713	family 8
Cluster55	F446I	4	0.0023175	0.89803	family 6
Cluster56	R561H	4	0.0023175	0.900348	family 3
Cluster57	WT	4	0.0023175	0.902665	family 9
Cluster58	WT	4	0.0023175	0.904983	na
Cluster59	WT	4	0.0023175	0.9073	family 9
Cluster60	WT	4	0.0023175	0.909618	family 4
Cluster61	R561H	4	0.0023175	0.911935	family 3
Cluster62	WT	4	0.0023175	0.914253	na
Cluster63	WT	4	0.0023175	0.91657	family 7
Cluster64	WT	3	0.00173812	0.918308	family 8
Cluster65	WT	3	0.00173812	0.920046	family 1
Cluster66	WT	3	0.00173812	0.921784	family 6
Cluster67	WT	3	0.00173812	0.923523	family 9
Cluster68	WT	3	0.00173812	0.925261	family 3
Cluster69	WT	3	0.00173812	0.926999	family 4
Cluster70	G449A	3	0.00173812	0.928737	na
Cluster71	WT	3	0.00173812	0.930475	family 5
Cluster72	C469Y	3	0.00173812	0.932213	na
Cluster73	F446I	3	0.00173812	0.933951	family 6
Cluster74	WT	3	0.00173812	0.935689	family 5
Cluster75	F446I	2	0.00115875	0.936848	family 6
Cluster76	C469Y	2	0.00115875	0.938007	na
Cluster77	WT	2	0.00115875	0.939166	na
Cluster78	G449A	2	0.00115875	0.940324	family 5
Cluster79	F446I	2	0.00115875	0.941483	family 1
Cluster80	F446I	2	0.00115875	0.942642	na
Cluster81	WT	2	0.00115875	0.943801	family 6
Cluster82	P441L	2	0.00115875	0.944959	family 2
Cluster83	WT	2	0.00115875	0.946118	na
Cluster84	WT	2	0.00115875	0.947277	family 4
Cluster85	R561H	2	0.00115875	0.948436	family 3
Cluster86	WT	2	0.00115875	0.949594	family 9
Cluster87	F446I	2	0.00115875	0.950753	family 1
Cluster88	F446I	2	0.00115875	0.951912	family 9
Cluster89	G449A	2	0.00115875	0.953071	family 9
Cluster90	P574L	2	0.00115875	0.954229	na
Cluster91	WT	2	0.00115875	0.955388	na
Cluster92	F446I	2	0.00115875	0.956547	family 7
Cluster93	WT	2	0.00115875	0.957706	na
Unique	na	73	0.0422943	1	49 genomes in family

## Sheet: Table S2 Worldwide data
Sample ID	Dataset	kelch13	Collection year	Collection site	Location
CKAF5210	Cerqueira et al., 2017	NA	2014	Mae Ra Mat Hospital	SMRU
KAE6110	Cerqueira et al., 2017	G533A	2014	Mae Ra Mat Hospital	SMRU
PD1184-C	MalariaGEN pf6	G533A	2013	WPA	SMRU					Summary
DMA403	Cerqueira et al., 2017	R561H	2014	Maela	SMRU					Population	Location	Unique genome No.	Single-infected sample No.
NHP3068	Cerqueira et al., 2017	E252Q	2008	Maela	SMRU					west Southeast Asia	SMRU	589	814
OHP124	Cerqueira et al., 2017	WT	2002	Maela	SMRU					west Southeast Asia	Myanmar other than Kayin	123	184
PD0481-C	MalariaGEN pf6	R561H	2012	Mae Sot	SMRU					east Southeast Asia	Cambodia	398	731
PD0923-C	MalariaGEN pf6	WT	2010	MLA	SMRU					east Southeast Asia	Viet Nam	102	173
PD1306-C	MalariaGEN pf6	WT	2002	MLA	SMRU					east Southeast Asia	Laos	80	90
PD1357-C	MalariaGEN pf6	WT	2003	MLA	SMRU					central Africa	Congo DR	166	170
Lane8_NHP4177	Cerqueira et al., 2017	WT	2008	WPA	SMRU					east Africa	Tanzania	179	194
PD0936-C	MalariaGEN pf6	WT	2007	WPA	SMRU					east Africa	Madagascar	21	21
PD1020-C	MalariaGEN pf6	WT	2008	WPA	SMRU					east Africa	Kenya	60	60
PD1024-C	MalariaGEN pf6	WT	2008	WPA	SMRU					east Africa	Mozambique	1	1
PD1043-C	MalariaGEN pf6	WT	2008	WPA	SMRU					east Africa	Malawi	109	112
PD1050-C	MalariaGEN pf6	WT	2008	WPA	SMRU					east Africa	Ethiopia	16	21
PD1077-C	MalariaGEN pf6	WT	2008	WPA	SMRU					east Africa	Uganda	6	6
Sample_4141	Cerqueira et al., 2017	WT	2008	WPA	SMRU					west Africa	Ghana	397	401
NHP1527	Cerqueira et al., 2017	C580Y	2014	Mawker Thai	SMRU					west Africa	Mali	238	241
NHP3228	Cerqueira et al., 2017	P441L	2014	Maela	SMRU					west Africa	Benin	25	25
NHP401183	Cerqueira et al., 2017	C580Y	2014	Wang Pha	SMRU					west Africa	Gambia	123	145
NHP4187	Cerqueira et al., 2017	NA	2008	Wang Pha	SMRU					west Africa	Mauritania	46	51
NHP418798	Cerqueira et al., 2017	C580Y	2014	Wang Pha	SMRU					west Africa	Burkina Faso	17	18
NHP4796	Cerqueira et al., 2017	C580Y	2012	Wang Pha	SMRU					west Africa	Guinea	81	83
NHP4800	Cerqueira et al., 2017	C580Y	2012	Wang Pha	SMRU					west Africa	Nigeria	24	24
NHP4827	Cerqueira et al., 2017	C580Y	2012	Wang Pha	SMRU					west Africa	Senegal	58	69
NHP4946	Cerqueira et al., 2017	C580Y	2014	Wang Pha	SMRU					west Africa	Cameroon	125	129
NHP4947	Cerqueira et al., 2017	C580Y	2014	Wang Pha	SMRU					west Africa	Ivory Coast	45	47
NHP4949	Cerqueira et al., 2017	C580Y	2014	Wang Pha	SMRU
NHP4952	Cerqueira et al., 2017	C580Y	2014	Wang Pha	SMRU
OZC2S2006	Cerqueira et al., 2017	C580Y	2014	Wang Pha	SMRU							Single-infected sample No.	Unique genome No.
PD0015-02	MalariaGEN pf6	E252Q	2007	Mae Sot	SMRU					WSEA	Kayin	1726	166
PD0514-C	MalariaGEN pf6	A481V	2011	Mae Sot	SMRU						SMRU	814	589
PD0520-C	MalariaGEN pf6	C580Y	2012	Mae Sot	SMRU						Myanmar other than Kayin	184	123
PD0540-C	MalariaGEN pf6	C580Y	2012	Mae Sot	SMRU					ESEA	Cambodia	731	398
PD0545-C	MalariaGEN pf6	C580Y	2012	Mae Sot	SMRU						Viet Nam	173	102
PD0571-C	MalariaGEN pf6	C580Y	2012	Mae Sot	SMRU						Laos	90	80
PD0573-C	MalariaGEN pf6	C580Y	2012	Mae Sot	SMRU					Africa	central Africa	170	166
PD0798-C	MalariaGEN pf6	P441L	2011	MKT	SMRU						east Africa	415	392
PD0830-C	MalariaGEN pf6	P441L	2013	MKT	SMRU						west Africa	1233	1179
PD0870-C	MalariaGEN pf6	P441L	2013	PLU	SMRU
PD0929-C	MalariaGEN pf6	C580Y	2013	MLA	SMRU
PD0990-C	MalariaGEN pf6	P527H	2008	WPA	SMRU
PD1105-C	MalariaGEN pf6	WT	2008	WPA	SMRU
PD1134-C	MalariaGEN pf6	E252Q	2009	WPA	SMRU
PD1165-C	MalariaGEN pf6	C580Y	2012	WPA	SMRU
PD1174-C	MalariaGEN pf6	C580Y	2012	WPA	SMRU
PD1190-C	MalariaGEN pf6	C580Y	2013	WPA	SMRU
PD1195-C	MalariaGEN pf6	C580Y	2013	WPA	SMRU
PD1198-C	MalariaGEN pf6	C580Y	2013	WPA	SMRU
PD1199-C	MalariaGEN pf6	C580Y	2013	MLA	SMRU
PD1200-C	MalariaGEN pf6	C580Y	2013	WPA	SMRU
PD1203-C	MalariaGEN pf6	C580Y	2013	WPA	SMRU
PD1205-C	MalariaGEN pf6	C580Y	2013	WPA	SMRU
PD1206-C	MalariaGEN pf6	C580Y	2013	WPA	SMRU
PD1210-C	MalariaGEN pf6	C580Y	2013	WPA	SMRU
PD1212-C	MalariaGEN pf6	C580Y	2013	WPA	SMRU
PD1214-C	MalariaGEN pf6	C580Y	2013	WPA	SMRU
PD1215-C	MalariaGEN pf6	C580Y	2013	WPA	SMRU
PD1221-C	MalariaGEN pf6	C580Y	2013	WPA	SMRU
PD1222-C	MalariaGEN pf6	C580Y	2013	WPA	SMRU
PD1224-C	MalariaGEN pf6	C580Y	2013	WPA	SMRU
PD1225-C	MalariaGEN pf6	C580Y	2013	WPA	SMRU
PD1227-C	MalariaGEN pf6	C580Y	2013	WPA	SMRU
PD1229-C	MalariaGEN pf6	C580Y	2013	WPA	SMRU
PD1230-C	MalariaGEN pf6	C580Y	2013	WPA	SMRU
PD1231-C	MalariaGEN pf6	C580Y	2013	WPA	SMRU
PD1232-C	MalariaGEN pf6	C580Y	2013	WPA	SMRU
PD1233-C	MalariaGEN pf6	C580Y	2013	WPA	SMRU
PD1234-C	MalariaGEN pf6	C580Y	2013	WPA	SMRU
PD1240-C	MalariaGEN pf6	C580Y	2013	WPA	SMRU
PD1243-C	MalariaGEN pf6	C580Y	2013	WPA	SMRU
PD1244-C	MalariaGEN pf6	C580Y	2013	WPA	SMRU
PD1246-C	MalariaGEN pf6	C580Y	2013	WPA	SMRU
PD1251-C	MalariaGEN pf6	C580Y	2013	WPA	SMRU
RDM45	Cerqueira et al., 2017	C580Y	2014	Wang Pha	SMRU
RDM46	Cerqueira et al., 2017	C580Y	2014	Wang Pha	SMRU
RDM53	Cerqueira et al., 2017	C580Y	2014	Wang Pha	SMRU
RDM8	Cerqueira et al., 2017	E252Q	2014	Maela	SMRU
Sample_HR9M_NHP4333	Cerqueira et al., 2017	NA	2008	WPA	SMRU
Sample_NHP3116-2D	Cerqueira et al., 2017	WT	2010	MLA	SMRU
Sample_NHP3124	Cerqueira et al., 2017	WT	2010	MLA	SMRU
PD1213-C	MalariaGEN pf6	G449A	2013	WPA	SMRU
RDM5	Cerqueira et al., 2017	WT	2014	Maela	SMRU
PD0533-C	MalariaGEN pf6	WT	2012	Mae Sot	SMRU
PD0887-C	MalariaGEN pf6	P441L	2008	MLA	SMRU
PD0966-C	MalariaGEN pf6	WT	2008	WPA	SMRU
PD0982-C	MalariaGEN pf6	WT	2008	WPA	SMRU
PD1049-C	MalariaGEN pf6	P527H	2008	WPA	SMRU
PD1084-C	MalariaGEN pf6	WT	2008	WPA	SMRU
PD1091-C	MalariaGEN pf6	P441L	2008	WPA	SMRU
PD1096-C	MalariaGEN pf6	P441L	2008	WPA	SMRU
PD1130-C	MalariaGEN pf6	WT	2008	WPA	SMRU
PD1141-C	MalariaGEN pf6	WT	2009	WPA	SMRU
PD1155-C	MalariaGEN pf6	P441L	2011	WPA	SMRU
Sample_4072	Cerqueira et al., 2017	WT	2008	WPA	SMRU
Sample_NHP1334-6B	Cerqueira et al., 2017	WT	2011	MKT	SMRU
PD1217-C	MalariaGEN pf6	WT	2013	WPA	SMRU
PD1241-C	MalariaGEN pf6	WT	2013	WPA	SMRU
NHP4828	Cerqueira et al., 2017	WT	2012	Wang Pha	SMRU
PD0478-C	MalariaGEN pf6	P441L	2011	Mae Sot	SMRU
NHP3229	Cerqueira et al., 2017	NA	2014	Maela	SMRU
NHP4839	Cerqueira et al., 2017	NA	2012	Wang Pha	SMRU
PD0527-C	MalariaGEN pf6	WT	2012	Mae Sot	SMRU
PD0546-C	MalariaGEN pf6	WT	2012	Mae Sot	SMRU
PD0549-C	MalariaGEN pf6	WT	2012	Mae Sot	SMRU
PD0552-C	MalariaGEN pf6	P441L	2011	Mae Sot	SMRU
PD0556-C	MalariaGEN pf6	P441L	2012	Mae Sot	SMRU
PD0563-C	MalariaGEN pf6	P441L	2012	Mae Sot	SMRU
PD0564-C	MalariaGEN pf6	P441L	2012	Mae Sot	SMRU
PD0569-C	MalariaGEN pf6	WT	2012	Mae Sot	SMRU
PD0630-C	MalariaGEN pf6	E252Q	2011	Mae Sot	SMRU
PD0632-C	MalariaGEN pf6	E252Q	2012	Mae Sot	SMRU
PD0635-C	MalariaGEN pf6	WT	2012	Mae Sot	SMRU
PD0636-C	MalariaGEN pf6	WT	2012	Mae Sot	SMRU
PD0720-C	MalariaGEN pf6	P527H	2008	MKT	SMRU
PD0725-C	MalariaGEN pf6	P527H	2008	MKT	SMRU
PD0751-C	MalariaGEN pf6	P527H	2008	MKT	SMRU
PD0810-C	MalariaGEN pf6	P441L	2013	MKT	SMRU
PD0820-C	MalariaGEN pf6	P441L	2013	MKT	SMRU
PD0928-C	MalariaGEN pf6	P574L	2013	MLA	SMRU
PD1156-C	MalariaGEN pf6	WT	2011	WPA	SMRU
PD1188-C	MalariaGEN pf6	P574L	2013	WPA	SMRU
PD1228-C	MalariaGEN pf6	P574L	2013	WPA	SMRU
Sample_NHP1455-12C	Cerqueira et al., 2017	R561H	2012	MKT	SMRU
Sample_NHP1461-6C	Cerqueira et al., 2017	P441L	2012	MKT	SMRU
Sample_NHP4478	Cerqueira et al., 2017	E252Q	2009	WPA	SMRU
NHP4773	Cerqueira et al., 2017	WT	2012	Wang Pha	SMRU
PD1164-C	MalariaGEN pf6	C580Y	2011	WPA	SMRU
PD0476-C	MalariaGEN pf6	WT	2011	Mae Sot	SMRU
PD1169-C	MalariaGEN pf6	E252Q	2012	WPA	SMRU
PD1236-C	MalariaGEN pf6	C580Y	2013	WPA	SMRU
NHP1525	Cerqueira et al., 2017	C580Y	2014	Mawker Thai	SMRU
PD0477-C	MalariaGEN pf6	C580Y	2011	Mae Sot	SMRU
PD0497-C	MalariaGEN pf6	A675V	2012	Mae Sot	SMRU
RDM64	Cerqueira et al., 2017	C580Y	2014	Mae Kon Ken	SMRU
RDM79	Cerqueira et al., 2017	C580Y	2014	Mawker Thai	SMRU
PD0831-C	MalariaGEN pf6	WT	2013	MKT	SMRU
PD1114-C	MalariaGEN pf6	R515K	2008	WPA	SMRU
PD0839-C	MalariaGEN pf6	WT	2008	PLU	SMRU
PD0977-C	MalariaGEN pf6	WT	2008	WPA	SMRU
PD0985-C	MalariaGEN pf6	E252Q	2008	WPA	SMRU
PD1079-C	MalariaGEN pf6	WT	2008	WPA	SMRU
PD1140-C	MalariaGEN pf6	WT	2009	WPA	SMRU
PD1394-C	MalariaGEN pf6	E252Q	2003	MLA	SMRU
PD0134-C	MalariaGEN pf6	WT	2005	Mae Sot	SMRU
NHP2211	Cerqueira et al., 2017	C580Y	2014	Mae Kon Ken	SMRU
PD0084-C	MalariaGEN pf6	WT	2003	MKT	SMRU
NHP104671	Cerqueira et al., 2017	C580Y	2014	Mawker Thai	SMRU
NHP114856	Cerqueira et al., 2017	C580Y	2014	Mawker Thai	SMRU
NHP3207	Cerqueira et al., 2017	E252Q	2012	Maela	SMRU
NHP3230	Cerqueira et al., 2017	NA	2014	Maela	SMRU
NHP3231	Cerqueira et al., 2017	C580Y	2014	Maela	SMRU
NHP4778	Cerqueira et al., 2017	C580Y	2012	Wang Pha	SMRU
NHP4779	Cerqueira et al., 2017	C580Y	2012	Wang Pha	SMRU
NHP4782	Cerqueira et al., 2017	C580Y	2012	Wang Pha	SMRU
NHP4783	Cerqueira et al., 2017	C580Y	2012	Wang Pha	SMRU
NHP4788	Cerqueira et al., 2017	E252Q	2012	Wang Pha	SMRU
NHP4832	Cerqueira et al., 2017	C580Y	2012	Wang Pha	SMRU
NHP4834	Cerqueira et al., 2017	C580Y	2012	Wang Pha	SMRU
NHP4840	Cerqueira et al., 2017	C580Y	2012	Wang Pha	SMRU
PD0496-C	MalariaGEN pf6	C580Y	2012	Mae Sot	SMRU
PD0567-C	MalariaGEN pf6	WT	2012	Mae Sot	SMRU
PD0572-C	MalariaGEN pf6	C580Y	2012	Mae Sot	SMRU
PD0745-C	MalariaGEN pf6	WT	2008	MKT	SMRU
PD0791-C	MalariaGEN pf6	P527H	2010	MKT	SMRU
PD0803-C	MalariaGEN pf6	C580Y	2012	MKT	SMRU
PD0804-C	MalariaGEN pf6	C580Y	2012	MKT	SMRU
PD0809-C	MalariaGEN pf6	P441L	2013	MKT	SMRU
PD0816-C	MalariaGEN pf6	C580Y	2013	MKT	SMRU
PD0818-C	MalariaGEN pf6	C580Y	2013	MKT	SMRU
PD0827-C	MalariaGEN pf6	C580Y	2013	MKT	SMRU
PD0926-C	MalariaGEN pf6	E252Q	2013	MLA	SMRU
PD0927-C	MalariaGEN pf6	C580Y	2013	MLA	SMRU
PD1167-C	MalariaGEN pf6	C580Y	2012	WPA	SMRU
PD1202-C	MalariaGEN pf6	C580Y	2013	WPA	SMRU
RDM76	Cerqueira et al., 2017	C580Y	2014	Wang Pha	SMRU
RDM80	Cerqueira et al., 2017	C580Y	2014	Mawker Thai	SMRU
RDM81	Cerqueira et al., 2017	C580Y	2014	Mawker Thai	SMRU
RDM84	Cerqueira et al., 2017	C580Y	2014	Mawker Thai	SMRU
Sample_NHP1337-12C	Cerqueira et al., 2017	C580Y	2011	MKT	SMRU
NHP110557	Cerqueira et al., 2017	NA	2014	Mawker Thai	SMRU
NHP114662	Cerqueira et al., 2017	C580Y	2014	Mawker Thai	SMRU
NHP4775	Cerqueira et al., 2017	NA	2012	Wang Pha	SMRU
NHP4830	Cerqueira et al., 2017	E252Q	2012	Wang Pha	SMRU
NHP4843	Cerqueira et al., 2017	WT	2012	Wang Pha	SMRU
PD0487-C	MalariaGEN pf6	WT	2012	Mae Sot	SMRU
PD0511-C	MalariaGEN pf6	WT	2011	Mae Sot	SMRU
PD0525-C	MalariaGEN pf6	WT	2012	Mae Sot	SMRU
PD0530-C	MalariaGEN pf6	WT	2012	Mae Sot	SMRU
PD0539-C	MalariaGEN pf6	WT	2012	Mae Sot	SMRU
PD0558-C	MalariaGEN pf6	WT	2012	Mae Sot	SMRU
PD0570-C	MalariaGEN pf6	WT	2012	Mae Sot	SMRU
PD0872-C	MalariaGEN pf6	WT	2013	PLU	SMRU
PD0931-C	MalariaGEN pf6	WT	2013	MLA	SMRU
PD0932-C	MalariaGEN pf6	WT	2013	MLA	SMRU
PD1026-C	MalariaGEN pf6	WT	2008	WPA	SMRU
PD1118-C	MalariaGEN pf6	WT	2008	WPA	SMRU
PD1145-C	MalariaGEN pf6	WT	2009	WPA	SMRU
PD1160-C	MalariaGEN pf6	WT	2011	WPA	SMRU
PD1171-C	MalariaGEN pf6	WT	2012	WPA	SMRU
PD1172-C	MalariaGEN pf6	WT	2012	WPA	SMRU
PD1182-C	MalariaGEN pf6	WT	2013	WPA	SMRU
PD1194-C	MalariaGEN pf6	WT	2013	WPA	SMRU
RDM87	Cerqueira et al., 2017	NA	2014	Mawker Thai	SMRU
Sample_4129	Cerqueira et al., 2017	P441L	2008	WPA	SMRU
NHP3206	Cerqueira et al., 2017	NA	2012	Maela	SMRU
NHP4764	Cerqueira et al., 2017	A675V	2011	Wang Pha	SMRU
NHP4772	Cerqueira et al., 2017	E252Q	2012	Wang Pha	SMRU
PD0032-C	MalariaGEN pf6	WT	2005	Mae Sot	SMRU
PD0473-C	MalariaGEN pf6	C580Y	2011	Mae Sot	SMRU
PD0483-C	MalariaGEN pf6	E252Q	2012	Mae Sot	SMRU
PD0550-C	MalariaGEN pf6	WT	2011	Mae Sot	SMRU
PD0629-C	MalariaGEN pf6	C580Y	2011	Mae Sot	SMRU
PD0873-C	MalariaGEN pf6	C580Y	2013	PLU	SMRU
PD0874-C	MalariaGEN pf6	C580Y	2013	PLU	SMRU
PD0933-C	MalariaGEN pf6	C580Y	2013	MLA	SMRU
PD1042-C	MalariaGEN pf6	WT	2008	WPA	SMRU
PD1168-C	MalariaGEN pf6	WT	2012	WPA	SMRU
PD1173-C	MalariaGEN pf6	C580Y	2012	WPA	SMRU
PD1178-C	MalariaGEN pf6	C580Y	2012	WPA	SMRU
PD1187-C	MalariaGEN pf6	C580Y	2013	WPA	SMRU
PD1191-C	MalariaGEN pf6	C580Y	2013	WPA	SMRU
PD1204-C	MalariaGEN pf6	C580Y	2013	WPA	SMRU
PD1211-C	MalariaGEN pf6	C580Y	2013	WPA	SMRU
PD1223-C	MalariaGEN pf6	C580Y	2013	WPA	SMRU
PD1226-C	MalariaGEN pf6	C580Y	2013	WPA	SMRU
PD1247-C	MalariaGEN pf6	C580Y	2013	MKT	SMRU
PD1250-C	MalariaGEN pf6	C580Y	2013	WPA	SMRU
PD1512-C	MalariaGEN pf6	WT	2004	WPA	SMRU
Sample_NHP4670	Cerqueira et al., 2017	WT	2010	WPA	SMRU
NHP115639	Cerqueira et al., 2017	WT	2014	Mawker Thai	SMRU
NHP1528	Cerqueira et al., 2017	WT	2014	Mawker Thai	SMRU
NHP1523	Cerqueira et al., 2017	P553L	2014	Mawker Thai	SMRU
OZC2S3003	Cerqueira et al., 2017	P553L	2014	Mawker Thai	SMRU
PD0468-C	MalariaGEN pf6	P553L	NA	NA	SMRU
NHP1524	Cerqueira et al., 2017	C580Y	2014	Mawker Thai	SMRU
NHP2209	Cerqueira et al., 2017	C580Y	2014	Mae Kon Ken	SMRU
NHP2212	Cerqueira et al., 2017	C580Y	2014	Mae Kon Ken	SMRU
PD0731-C	MalariaGEN pf6	P527H	2008	MKT	SMRU
PD0829-C	MalariaGEN pf6	A481V	2013	MKT	SMRU
PD0878-C	MalariaGEN pf6	C580Y	2013	MKK	SMRU
PD0879-C	MalariaGEN pf6	C580Y	2013	PLU	SMRU
PD0956-C	MalariaGEN pf6	WT	2008	WPA	SMRU
PD0983-C	MalariaGEN pf6	WT	2008	WPA	SMRU
PD1127-C	MalariaGEN pf6	WT	2008	WPA	SMRU
PD1239-C	MalariaGEN pf6	C580Y	2013	WPA	SMRU
RDM43	Cerqueira et al., 2017	C580Y	2014	Wang Pha	SMRU
PD1162-C	MalariaGEN pf6	WT	2011	WPA	SMRU
PD1116-C	MalariaGEN pf6	WT	2008	WPA	SMRU
Sample_NHP4503-10C	Cerqueira et al., 2017	WT	2009	WPA	SMRU
NHP3015	Cerqueira et al., 2017	WT	2008	Maela	SMRU
PD0101-C	MalariaGEN pf6	WT	2005	Mae Sot	SMRU
PD0749-C	MalariaGEN pf6	WT	2008	MKT	SMRU
PD0758-C	MalariaGEN pf6	WT	2008	MKT	SMRU
Sample_4142	Cerqueira et al., 2017	WT	2008	WPA	SMRU
NHP3020	Cerqueira et al., 2017	WT	2008	Maela	SMRU
PD0488-C	MalariaGEN pf6	E252Q	2012	Mae Sot	SMRU
PD1078-C	MalariaGEN pf6	WT	2008	WPA	SMRU
NHP3046	Cerqueira et al., 2017	WT	2008	Maela	SMRU
PD0856-C	MalariaGEN pf6	WT	2008	PLU	SMRU
PD0994-C	MalariaGEN pf6	WT	2008	WPA	SMRU
PD1278-C	MalariaGEN pf6	WT	2001	MLA	SMRU
NHP3055	Cerqueira et al., 2017	E252Q	2008	Maela	SMRU
NHP3065	Cerqueira et al., 2017	WT	2008	Maela	SMRU
PD0806-C	MalariaGEN pf6	C580Y	2012	MKT	SMRU
PD0832-C	MalariaGEN pf6	R561H	2013	MKT	SMRU
PD0881-C	MalariaGEN pf6	WT	2007	MLA	SMRU
PD0889-C	MalariaGEN pf6	WT	2008	MLA	SMRU
PD0909-C	MalariaGEN pf6	WT	2008	MLA	SMRU
PD0951-C	MalariaGEN pf6	E252Q	2007	WPA	SMRU
PD1015-C	MalariaGEN pf6	E252Q	2008	WPA	SMRU
PD1100-C	MalariaGEN pf6	E252Q	2008	WPA	SMRU
PD1119-C	MalariaGEN pf6	WT	2008	WPA	SMRU
PD1153-C	MalariaGEN pf6	E252Q	2011	WPA	SMRU
Sample_LGMT_NHP4242	Cerqueira et al., 2017	A675V	2008	WPA	SMRU
PD0968-C	MalariaGEN pf6	WT	2008	WPA	SMRU
PD0969-C	MalariaGEN pf6	WT	2008	WPA	SMRU
NHP3066	Cerqueira et al., 2017	WT	2008	Maela	SMRU
PD0885-C	MalariaGEN pf6	WT	2007	MLA	SMRU
PD0939-C	MalariaGEN pf6	WT	2007	WPA	SMRU
PD0987-C	MalariaGEN pf6	WT	2008	WPA	SMRU
PD1021-C	MalariaGEN pf6	WT	2008	WPA	SMRU
PD1028-C	MalariaGEN pf6	WT	2008	WPA	SMRU
PD1086-C	MalariaGEN pf6	WT	2008	WPA	SMRU
Sample_NHP4151	Cerqueira et al., 2017	WT	2008	WPA	SMRU
Sample_NHP4373	Cerqueira et al., 2017	WT	2008	WPA	SMRU
PD1092-C	MalariaGEN pf6	WT	2008	WPA	SMRU
NHP4811	Cerqueira et al., 2017	R561H	2012	Wang Pha	SMRU
NHP4841	Cerqueira et al., 2017	E252Q	2012	Wang Pha	SMRU
PD0495-C	MalariaGEN pf6	R561H	2012	Mae Sot	SMRU
PD0562-C	MalariaGEN pf6	R561H	2012	Mae Sot	SMRU
PD0565-C	MalariaGEN pf6	R561H	2012	Mae Sot	SMRU
PD0799-C	MalariaGEN pf6	R561H	2012	MKT	SMRU
PD0819-C	MalariaGEN pf6	R561H	2013	MKT	SMRU
PD0822-C	MalariaGEN pf6	R561H	2013	MKT	SMRU
PD0826-C	MalariaGEN pf6	R561H	2013	MKT	SMRU
PD1109-C	MalariaGEN pf6	WT	2008	WPA	SMRU
Sample_3035	Cerqueira et al., 2017	NA	2008	MLA	SMRU
Sample_NHP1454-8F	Cerqueira et al., 2017	R561H	2012	MKT	SMRU
PD0459-Cx	MalariaGEN pf6	WT	2011	Mae Sot	SMRU
PD0532-C	MalariaGEN pf6	WT	2012	Mae Sot	SMRU
PD0717-C	MalariaGEN pf6	WT	2007	MKT	SMRU
PD0766-C	MalariaGEN pf6	WT	2008	MKT	SMRU
PD0777-C	MalariaGEN pf6	WT	2008	MKT	SMRU
NHP4315	Cerqueira et al., 2017	P441L	2008	Wang Pha	SMRU
PD0828-C	MalariaGEN pf6	R561H	2013	MKT	SMRU
PD0876-C	MalariaGEN pf6	R561H	2013	MKK	SMRU
PD0925-C	MalariaGEN pf6	WT	2012	MLA	SMRU
PD1095-C	MalariaGEN pf6	P441L	2008	WPA	SMRU
Sample_NHP1380-7A	Cerqueira et al., 2017	WT	2011	MKT	SMRU
PD0986-C	MalariaGEN pf6	WT	2008	WPA	SMRU
NHP4776	Cerqueira et al., 2017	C580Y	2012	Wang Pha	SMRU
PD0516-C	MalariaGEN pf6	C580Y	2012	Mae Sot	SMRU
NHP3232	Cerqueira et al., 2017	NA	2014	Maela	SMRU
NHP4251	Cerqueira et al., 2017	WT	2008	Wang Pha	SMRU
PD0535-C	MalariaGEN pf6	WT	2012	Mae Sot	SMRU
PD0559-C	MalariaGEN pf6	WT	2012	Mae Sot	SMRU
PD0814-C	MalariaGEN pf6	C580Y	2013	MKT	SMRU
PD0825-C	MalariaGEN pf6	C580Y	2013	MKT	SMRU
PD0980-C	MalariaGEN pf6	WT	2008	WPA	SMRU
PD1051-C	MalariaGEN pf6	WT	2008	WPA	SMRU
PD1161-C	MalariaGEN pf6	WT	2011	WPA	SMRU
Sample_NHP3160-8B	Cerqueira et al., 2017	NA	2011	MLA	SMRU
PD0547-C	MalariaGEN pf6	WT	2012	Mae Sot	SMRU
PD0782-C	MalariaGEN pf6	WT	2008	MKT	SMRU
PD0973-C	MalariaGEN pf6	WT	2008	WPA	SMRU
NHP4049	Cerqueira et al., 2017	WT	2008	Wang Pha	SMRU
NHP4224	Cerqueira et al., 2017	WT	2008	Wang Pha	SMRU
NHP4085	Cerqueira et al., 2017	WT	2008	Wang Pha	SMRU
PD0955-C	MalariaGEN pf6	WT	2008	WPA	SMRU
PD0995-C	MalariaGEN pf6	WT	2008	WPA	SMRU
PD1037-C	MalariaGEN pf6	WT	2008	WPA	SMRU
NHP4118	Cerqueira et al., 2017	WT	2008	Wang Pha	SMRU
PD0942-C	MalariaGEN pf6	WT	2007	WPA	SMRU
PD1039-C	MalariaGEN pf6	WT	2008	WPA	SMRU
PD1107-C	MalariaGEN pf6	WT	2008	WPA	SMRU
Sample_4106	Cerqueira et al., 2017	WT	2008	WPA	SMRU
NHP4162	Cerqueira et al., 2017	WT	2008	Wang Pha	SMRU
PD1075-C	MalariaGEN pf6	WT	2008	WPA	SMRU
NHP4781	Cerqueira et al., 2017	E252Q	2012	Wang Pha	SMRU
PD0518-C	MalariaGEN pf6	WT	2012	Mae Sot	SMRU
PD1419-C	MalariaGEN pf6	WT	2004	MLA	SMRU
NHP4232	Cerqueira et al., 2017	P574L	2008	Wang Pha	SMRU
PD1005-C	MalariaGEN pf6	P574L	2008	WPA	SMRU
PD1014-C	MalariaGEN pf6	P574L	2008	WPA	SMRU
PD1031-C	MalariaGEN pf6	P574L	2008	WPA	SMRU
PD1063-C	MalariaGEN pf6	P574L	2008	WPA	SMRU
PD1112-C	MalariaGEN pf6	P574L	2008	WPA	SMRU
Sample_3120	Cerqueira et al., 2017	P574L	2010	MLA	SMRU
Sample_4068	Cerqueira et al., 2017	P574L	2008	WPA	SMRU
Sample_4133	Cerqueira et al., 2017	P574L	2008	WPA	SMRU
Sample_4148	Cerqueira et al., 2017	P574L	2008	WPA	SMRU
NHP4234	Cerqueira et al., 2017	WT	2008	Wang Pha	SMRU
PD0971-C	MalariaGEN pf6	WT	2008	WPA	SMRU
Sample_NHP4097	Cerqueira et al., 2017	WT	2008	WPA	SMRU
NHP4302	Cerqueira et al., 2017	WT	2008	Wang Pha	SMRU
PD0886-C	MalariaGEN pf6	WT	2008	MLA	SMRU
PD0937-C	MalariaGEN pf6	WT	2007	WPA	SMRU
PD0954-C	MalariaGEN pf6	WT	2008	WPA	SMRU
PD1093-C	MalariaGEN pf6	WT	2008	WPA	SMRU
NHP4303	Cerqueira et al., 2017	A675V	2008	Wang Pha	SMRU
PD0512-C	MalariaGEN pf6	A675V	2011	Mae Sot	SMRU
PD1505-C	MalariaGEN pf6	WT	2004	WPA	SMRU
NHP4366	Cerqueira et al., 2017	WT	2008	Wang Pha	SMRU
PD0005-C	MalariaGEN pf6	WT	2005	Mae Sot	SMRU
PD0031-C	MalariaGEN pf6	WT	2005	Mae Sot	SMRU
PD0033-C	MalariaGEN pf6	WT	2005	Mae Sot	SMRU
PD0034-C	MalariaGEN pf6	WT	2008	Mae Sot	SMRU
PD0132-C	MalariaGEN pf6	WT	2005	Mae Sot	SMRU
PD0513-C	MalariaGEN pf6	A675V	2011	Mae Sot	SMRU
PD0548-C	MalariaGEN pf6	A675V	2012	Mae Sot	SMRU
PD0746-C	MalariaGEN pf6	A675V	2008	MKT	SMRU
PD0762-C	MalariaGEN pf6	WT	2008	MKT	SMRU
PD0772-C	MalariaGEN pf6	WT	2008	MKT	SMRU
PD0834-C	MalariaGEN pf6	WT	2007	PLU	SMRU
PD0841-C	MalariaGEN pf6	WT	2008	PLU	SMRU
PD0924-C	MalariaGEN pf6	A675V	2012	MLA	SMRU
PD1193-C	MalariaGEN pf6	A675V	2013	WPA	SMRU
PD1197-C	MalariaGEN pf6	A675V	2013	WPA	SMRU
PD1318-C	MalariaGEN pf6	WT	2002	MLA	SMRU
NHP4371	Cerqueira et al., 2017	A675V	2008	Wang Pha	SMRU
PD1052-C	MalariaGEN pf6	WT	2008	WPA	SMRU
Sample_NHP4078	Cerqueira et al., 2017	A675V	2008	WPA	SMRU
NHP4374	Cerqueira et al., 2017	NA	2008	Wang Pha	SMRU
PD0800-C	MalariaGEN pf6	R561H	2012	MKT	SMRU
PD0823-C	MalariaGEN pf6	R561H	2013	MKT	SMRU
PD0824-C	MalariaGEN pf6	R561H	2013	MKT	SMRU
NHP4748	Cerqueira et al., 2017	WT	2011	Wang Pha	SMRU
NHP4749	Cerqueira et al., 2017	P441L	2011	Wang Pha	SMRU
NHP4761	Cerqueira et al., 2017	E252Q	2011	Wang Pha	SMRU
PD0744-C	MalariaGEN pf6	E252Q	2008	MKT	SMRU
PD0767-C	MalariaGEN pf6	WT	2008	MKT	SMRU
PD0796-C	MalariaGEN pf6	WT	2010	MKT	SMRU
PD0462-C	MalariaGEN pf6	A675V	2011	Mae Sot	SMRU
[truncated: 3,415 more rows]

## Sheet: Table S3_PopSizeEstimates 
Location	Population	Year	Incidance (cases per 1000 people)	Single-genotype sample No.	Unique genome No.	Proportion of multiple-genotype infections	Genetic richness (RG)	Ne	JackKnife 95% CI_down	JackKnife 95% CI_up	Parametric 95% CI_down	Parametric 95% CI_up
[truncated: 62 more rows]
